# Supplementary material for: The 4E-BP Caf20p Mediates Both eIF4E-Dependent and Independent Repression of Translation
Source: PLoS Genet. 2015 May 14;11(5):e1005233. doi: 10.1371/journal.pgen.1005233 (PMC4431810; doi:10.1371/journal.pgen.1005233)
Supplement: S1 Dataset — Refer to the header sheet for details. (XLSX) [file pgen.1005233.s008.xlsx]

## Sheet: Cover sheet
Supplementary datasets 1 accompanying:
eIF4E-dependent and independent repression of translation by the 4E-BP Caf20p
Lydia M. Castelli, David Talavera, Christopher J. Kershaw, Sarah S. Mohammad-Qureshi, Joseph L. Costello, William Rowe, Paul F. G. Sims, Christopher M. Grant, Simon J. Hubbard, Mark P. Ashe, and Graham D. Pavitt
Dataset 1		Caf20p-TAP protein IP. Progenesis relative protein quantification of proteins associating with Caf20p-TAP
Dataset 2		Eap1p-TAP protein IP. Progenesis relative protein quantification of proteins associating with Eap1p-TAP
Dataset 3		WT VS caf20∆ proteome. Progenesis relative protein quantification of proteins changing in caf20∆ vs Wildtype
Dataset 4		WT VS eap1∆ proteome. Progenesis relative protein quantification of proteins changing in eap1∆ vs Wildtype
Dataset 5		WT VS caf20∆eap1∆ proteome. Progenesis relative protein quantification of proteins changing in caf20∆eap1∆ cells vs Wildtype
Dataset 6		WT VS caf20m2 proteome. Progenesis relative protein quantification of proteins changing in caf20m2 vs Wildtype
Dataset 7		illuminaRNA-Seq CAF20-FLAG RNA IP. EdgeR Generalized Linear Model (GLM) enrichment of mRNAs over total RNA for Caf20-FLAG IP RNA
Dataset 8		illuminaRNA-Seq CAF20m2-FLAG RNA IP .EdgeR Generalized Linear Model (GLM) enrichment of mRNAs over total RNA for Caf20-FLAG IP RNA
Dataset 9		Caf20p Core 4E-DEP mRNA targets
Dataset 10		Caf20p Core 4E-IND mRNA targets
Dataset 11		4E-IND 3'UTR Meme Motifs
Each sheet (tab) contains a separate Dataset

## Sheet: Dataset1. Caf20-TAP protein IP
Accession	Peptide.count	Peptides.used.for.quantitation	Confidence.score	Anova..p.	FDR	Max.fold.change	Highest.mean.condition	Lowest.mean.condition
YGR034W	12	2	295.53	7.23e-07	0.000279078	25.8828	Caf20	Control
YOL139C	19	16	1023.05	4.87e-06	0.000653627	71.0854	Caf20	Control
YPL106C	10	6	276.23	5.08e-06	0.000653627	6.25274	Caf20	Control
YER006W	2	1	65.28	7.17e-06	0.000677044	241.831	Caf20	Control
YIR020W-A	1	1	16.82	8.77e-06	0.000677044	185.899	Caf20	Control
YOR124C	2	1	28.58	1.49e-05	0.000952133	121.851	Caf20	Control
YKL006W	13	1	586.77	1.79e-05	0.000952133	11.9355	Caf20	Control
YMR019W	1	1	17.29	2e-05	0.000952133	189.311	Caf20	Control
YOR207C	5	3	94.03	2.22e-05	0.000952133	2.19166	Control	Caf20
YOR276W	7	7	248.24	5.01e-05	0.00175778	28.6662	Caf20	Control
YLR344W	12	2	298.86	5.45e-05	0.00175778	10.2435	Caf20	Control
YPR043W	7	6	295.15	5.9e-05	0.00175778	13.1615	Caf20	Control
YDL075W;YLR406C	8	8	228.57	5.92e-05	0.00175778	7.67847	Caf20	Control
YNL096C	9	5	289.03	9.75e-05	0.00238529	3.77615	Caf20	Control
YPL093W	6	5	72.26	0.000104453	0.00238529	8.80213	Caf20	Control
YCL059C	4	3	92.28	0.000112704	0.00238529	5.32684	Caf20	Control
YGL147C	15	4	554.24	0.000119057	0.00238529	12.0549	Caf20	Control
YGR085C	12	11	505.91	0.000123243	0.00238529	3.41095	Caf20	Control
YOL120C	13	9	534.03	0.000128272	0.00238529	6.55575	Caf20	Control
YBL087C	10	10	426.05	0.000132312	0.00238529	4.03333	Caf20	Control
YAR073W	6	1	243.42	0.000137277	0.00238529	4.20286	Control	Caf20
YPR181C	6	6	144.16	0.000139127	0.00238529	5.76515	Caf20	Control
YPL198W	21	1	785.78	0.000142129	0.00238529	7.53195	Caf20	Control
YDL213C	2	2	76.4	0.000167396	0.00269229	7.26736	Caf20	Control
YKL107W	1	1	29.61	0.000213634	0.00318076	18.4122	Control	Caf20
YBR121C	2	1	20.4	0.000214248	0.00318076	6.63957	Control	Caf20
YGL120C	4	4	118.06	0.000231186	0.0033051	4.40022	Caf20	Control
YGR054W	2	2	23.46	0.00025407	0.00350254	8.42233	Caf20	Control
YGR118W	7	6	311.6	0.000265818	0.00353813	20.0566	Caf20	Control
YIL069C	10	10	330.39	0.000288769	0.00357461	4.86492	Caf20	Control
YGR271C-A	4	3	75.74	0.000297342	0.00357461	10.517	Caf20	Control
YDL007W	2	2	41.17	0.000306738	0.00357461	4.80245	Control	Caf20
YLR325C	3	3	133.55	0.000311286	0.00357461	5.72286	Caf20	Control
YIL052C	5	3	177.77	0.000314862	0.00357461	10.1973	Caf20	Control
YOR151C	4	2	63.33	0.000350329	0.00386363	3.00862	Control	Caf20
YGL031C	9	2	433.86	0.000397125	0.00424191	16.9663	Caf20	Control
YGR178C	2	2	50.4	0.000415541	0.00424191	2.96937	Control	Caf20
YML024W	10	10	429.01	0.000417597	0.00424191	7.51967	Caf20	Control
YPL242C	2	2	26.44	0.000461598	0.00456864	2.02428	Control	Caf20
YOR096W	8	5	204.36	0.000513436	0.00484999	3.49197	Caf20	Control
YBR257W	2	2	24.06	0.000530911	0.00484999	7.36062	Control	Caf20
YNL178W	23	20	917	0.00054531	0.00484999	6.54647	Caf20	Control
YHL001W	13	1	574.31	0.000568676	0.00484999	61.7821	Caf20	Control
YNL248C	6	5	59.19	0.00056988	0.00484999	25.4727	Caf20	Control
YLR276C	2	1	33.52	0.000575775	0.00484999	32.5832	Caf20	Control
YLR003C	1	1	35.56	0.000587158	0.00484999	35.8023	Caf20	Control
YDL136W	7	7	400.63	0.000594809	0.00484999	6.26478	Caf20	Control
YHR052W	1	1	13.68	0.000603108	0.00484999	4.74618	Caf20	Control
YLR029C;YMR121C	13	11	455.81	0.000640867	0.00497652	5.39013	Caf20	Control
YBL092W	8	7	275.17	0.000648751	0.00497652	7.13731	Caf20	Control
YGL173C	22	18	728.24	0.000676011	0.00497652	3.91296	Caf20	Control
YPL249C-A	11	2	460.4	0.00067794	0.00497652	14.5522	Caf20	Control
YKL104C	8	8	294.73	0.000683304	0.00497652	3.70463	Caf20	Control
YKL054C	2	2	23.75	0.000705565	0.00504348	2.8955	Control	Caf20
YLR419W	6	4	76.23	0.000728099	0.00510993	2.20182	Control	Caf20
YNL016W	3	2	33.63	0.000776978	0.0053556	5.18257	Control	Caf20
YNL069C	15	10	430.06	0.000891242	0.00603543	5.43473	Caf20	Control
YLR180W	14	5	410.84	0.000918079	0.00606294	3.97836	Control	Caf20
YDL083C	9	9	329.3	0.000926719	0.00606294	6.1019	Caf20	Control
YAL036C	8	5	226.35	0.000943445	0.0060695	8.16539	Caf20	Control
YIL133C	13	8	378.56	0.00100032	0.00632989	4.70747	Caf20	Control
YJL074C	4	2	30.68	0.00115356	0.00686549	4.29498	Control	Caf20
YPL126W	1	1	41.54	0.00116546	0.00686549	42.3233	Caf20	Control
YLL045C	25	7	947.93	0.0011787	0.00686549	4.89195	Caf20	Control
YOL040C	5	5	168	0.00117874	0.00686549	5.27568	Caf20	Control
YMR033W	3	2	37.82	0.00119296	0.00686549	2.44135	Control	Caf20
YDR457W	3	2	32.02	0.00121516	0.00686549	2.5982	Control	Caf20
YDR496C	4	3	68.5	0.00122824	0.00686549	3.8743	Control	Caf20
YCL037C	6	5	348.08	0.00123859	0.00686549	10.0341	Caf20	Control
YLR340W	15	15	544.34	0.00124504	0.00686549	3.00594	Caf20	Control
YMR080C	10	8	226.57	0.00129549	0.00701352	3.89867	Caf20	Control
YGL135W	19	18	815.75	0.00130822	0.00701352	3.70647	Caf20	Control
YHR089C	3	2	75.22	0.00141035	0.00738692	4.44991	Caf20	Control
YOR182C	1	1	33.96	0.00141614	0.00738692	57.5319	Caf20	Control
YMR207C	2	1	86.99	0.00150987	0.00777078	5.73893	Control	Caf20
YBL072C	11	9	413.11	0.00153371	0.00778962	5.47621	Caf20	Control
YLR258W	1	1	25.27	0.00159214	0.00795816	34.9178	Caf20	Control
YHR020W	10	9	262.94	0.00160813	0.00795816	9.47114	Caf20	Control
YOL041C	5	5	149.25	0.00166854	0.00815263	5.55217	Caf20	Control
YOR133W	43	41	1441.34	0.0017078	0.00824015	2.55772	Caf20	Control
YLR216C	3	3	81.83	0.00172928	0.00824076	2.10931	Caf20	Control
YLR150W	9	8	304.5	0.00176563	0.0083114	2.89093	Caf20	Control
YMR242C	20	20	849.1	0.00182156	0.00847135	4.37276	Caf20	Control
YOR204W	14	11	417.4	0.00186502	0.00857022	4.30235	Caf20	Control
YBR189W;YPL081W	18	12	604.19	0.00189256	0.00859444	5.78109	Caf20	Control
YHR010W;YDR471W	9	8	325.86	0.00193219	0.00867238	4.75739	Caf20	Control
YER131W	3	2	59.23	0.00200345	0.00888886	7.80066	Caf20	Control
YPL131W	4	4	137.57	0.00212633	0.00926228	1.80315	Control	Caf20
YDL014W	15	12	440.3	0.0021356	0.00926228	3.5921	Caf20	Control
YLR448W	18	5	693.44	0.00221952	0.00951928	3.93305	Caf20	Control
YJR145C	21	19	741.43	0.00231506	0.00981995	7.16294	Caf20	Control
YLR422W	5	1	18.88	0.00239708	0.0100573	11.7411	Caf20	Control
YLR167W;YIL148W	9	9	312.6	0.00245387	0.0101391	4.2587	Caf20	Control
YIL033C	3	3	48.8	0.00246911	0.0101391	2.08161	Control	Caf20
YDL082W	14	1	412.79	0.00262976	0.0106851	9.14811	Caf20	Control
YGR027C	6	5	236.3	0.00267703	0.0107639	6.78997	Caf20	Control
YOR243C	4	2	51.44	0.00278897	0.0110144	6.95645	Caf20	Control
YGR186W	3	2	30.6	0.00282069	0.0110144	3.01947	Control	Caf20
YKL009W	2	2	23.71	0.00282494	0.0110144	2.22614	Caf20	Control
YMR032W	2	1	20.3	0.00296368	0.0114398	6.50778	Control	Caf20
YCR077C	1	1	56.36	0.00304999	0.0115104	5.97932	Control	Caf20
YJL052W	10	1	375.07	0.0030561	0.0115104	1.71821	Control	Caf20
YGL123W	10	9	436.26	0.00307142	0.0115104	6.42629	Caf20	Control
YOL127W	15	15	681.07	0.0032534	0.0120276	3.98007	Caf20	Control
YML026C	10	9	334.92	0.00327175	0.0120276	6.40521	Caf20	Control
YGL030W	12	11	508.51	0.00346438	0.0126156	3.27311	Caf20	Control
YNL112W	9	6	218.57	0.00353776	0.012686	2.51269	Caf20	Control
YMR142C	14	1	444.24	0.00354945	0.012686	4.3248	Caf20	Control
YGR264C	5	4	134.25	0.00360788	0.0127765	2.53688	Control	Caf20
YLR075W	15	15	487.94	0.00377353	0.0132417	7.0128	Caf20	Control
YDL229W	46	3	2249.33	0.00387118	0.0134619	1.69339	Caf20	Control
YDR130C	2	1	14.42	0.00398966	0.0137501	2.04682	Control	Caf20
YDR050C	1	1	23.5	0.00417239	0.0142526	1.99862	Control	Caf20
YJL190C	9	9	485.31	0.00433084	0.0146641	3.86261	Caf20	Control
YKL133C	2	1	16.8	0.00442625	0.0148568	4.59467	Caf20	Control
YLR384C	3	2	58.44	0.00448285	0.0149119	3.35851	Control	Caf20
YML073C	19	6	679.87	0.00453827	0.0149119	4.58324	Caf20	Control
YBR025C	3	3	59.21	0.00455855	0.0149119	3.63583	Caf20	Control
YLR185W	1	1	23.67	0.00471493	0.0152938	20.7292	Caf20	Control
YBR248C	2	2	21.85	0.00493045	0.0158596	1.77411	Control	Caf20
YLR248W	2	2	25.65	0.00502119	0.016018	3.99673	Caf20	Control
YNL071W	22	20	962.46	0.0053832	0.0168937	2.8206	Control	Caf20
YJR064W	3	3	43.62	0.00538323	0.0168937	1.6576	Control	Caf20
YEL031W	4	3	32.82	0.00547431	0.017041	2.02345	Control	Caf20
YOR369C	5	4	172.1	0.0058718	0.0181321	1.83502	Caf20	Control
YOR063W	23	19	891.99	0.00615108	0.0188438	5.37846	Caf20	Control
YER165W	27	25	919.81	0.00661554	0.0201071	1.88734	Caf20	Control
YGL076C	23	3	838.39	0.00674752	0.020348	6.51293	Caf20	Control
YOR234C	10	2	292.18	0.00690307	0.0206557	4.47521	Caf20	Control
YLR061W	4	3	140.21	0.00703885	0.0209	6.42886	Caf20	Control
YJR123W	6	6	256.63	0.00710824	0.0209449	3.14099	Caf20	Control
YPL043W	7	7	114.83	0.00726991	0.0211645	4.20485	Caf20	Control
YLR441C	28	5	825.45	0.00729243	0.0211645	5.22325	Caf20	Control
YDR172W	2	2	28.15	0.00737706	0.0211819	15.807	Caf20	Control
YLR222C	1	1	26.17	0.00740819	0.0211819	14.7598	Caf20	Control
YKL014C	8	3	49.01	0.00758765	0.0215216	3.53851	Control	Caf20
YOL039W	1	1	56.23	0.00763848	0.0215216	5.17064	Caf20	Control
YBL027W	11	10	499.2	0.0080968	0.0226476	6.22094	Caf20	Control
YDL040C	4	4	122.21	0.00818671	0.0227343	6.75561	Caf20	Control
YDR060W	2	2	44.68	0.00866855	0.0239004	5.97416	Control	Caf20
YKL035W	5	3	72.58	0.00885266	0.024235	2.30732	Caf20	Control
YMR083W	3	1	38.27	0.0094555	0.0252074	12.8951	Caf20	Control
YLR197W	11	9	327.86	0.00951252	0.0252074	4.13362	Caf20	Control
YMR012W	4	4	135.68	0.00954332	0.0252074	3.73896	Caf20	Control
YDR025W	9	8	293.17	0.00956752	0.0252074	3.5938	Caf20	Control
YHL034C	5	5	95.07	0.00961326	0.0252074	1.93578	Caf20	Control
YIL018W	13	13	404.14	0.00961576	0.0252074	4.56869	Caf20	Control
YPL061W	7	7	132.89	0.009665	0.0252074	2.43461	Caf20	Control
YHL033C	23	5	934.07	0.0103258	0.0267502	4.30486	Caf20	Control
YBL024W	2	1	63.02	0.0104332	0.0268482	17.4171	Caf20	Control
YGL103W	8	8	207.05	0.0109088	0.0278861	5.4346	Caf20	Control
YOR185C	4	4	81.58	0.0111112	0.0282167	11.5363	Caf20	Control
YCL011C	2	2	81.49	0.0115888	0.0292372	6.36606	Caf20	Control
YBR221C	21	21	1002.78	0.0129035	0.0323426	2.65651	Control	Caf20
YER178W	46	46	1534.55	0.0130753	0.0325618	2.72992	Control	Caf20
YNL175C	2	1	22.12	0.0134833	0.0333625	5.49816	Caf20	Control
YNL209W	46	3	2363.5	0.0136488	0.0335569	1.56137	Caf20	Control
YLR342W;YGR032W	12	11	292.97	0.0140317	0.034242	4.6305	Caf20	Control
YDR482C	1	1	14.98	0.0141714	0.034242	4.12488	Control	Caf20
YDR381W	7	7	265.84	0.0141936	0.034242	3.47201	Caf20	Control
YOR004W	2	2	35.99	0.0143984	0.0342421	8.61049	Caf20	Control
YPL020C	4	1	43.59	0.0144251	0.0342421	3.48738	Control	Caf20
YBR029C	1	1	21.54	0.0144598	0.0342421	3.3571	Caf20	Control
YGR148C	9	2	389.7	0.0150657	0.0354594	22.3547	Caf20	Control
YJL008C	5	5	183.89	0.0153046	0.0356147	4.74819	Caf20	Control
YER021W	3	2	141.85	0.0154064	0.0356147	5.51813	Caf20	Control
YPL090C	17	15	638.94	0.0154084	0.0356147	4.35337	Caf20	Control
YJR144W	12	11	311.88	0.0163284	0.0372011	4.9184	Control	Caf20
YPR074C	3	2	40.55	0.0163843	0.0372011	3.10754	Control	Caf20
YLR044C;YGR087C;YLR134W	19	19	744.61	0.0164164	0.0372011	2.5742	Caf20	Control
YOR198C	8	8	168.11	0.0165269	0.0372011	3.05242	Caf20	Control
YAR007C	14	14	448.63	0.0165767	0.0372011	4.16857	Control	Caf20
YGL245W	10	7	364.37	0.0179127	0.039967	5.15098	Caf20	Control
YJL033W	3	3	159.17	0.0181052	0.0399987	13.3383	Caf20	Control
YPL032C	2	2	39.31	0.0181341	0.0399987	6.7442	Caf20	Control
YPL143W	10	2	287.15	0.0188088	0.0412511	3.33685	Caf20	Control
YML063W	28	5	832.74	0.0193241	0.0421418	3.85362	Caf20	Control
YHR174W;YGR254W	13	13	434.49	0.0218363	0.0473529	1.81025	Control	Caf20
YKL180W	15	2	588.6	0.0220322	0.0475108	3.98606	Caf20	Control
YDL126C	14	12	393.44	0.0226685	0.0486113	1.83231	Caf20	Control
YLL024C;YBL075C;YER103W	36	9	1518.74	0.022995	0.0490392	1.41416	Caf20	Control
YGR204W	11	7	279.18	0.0232822	0.04907	3.45259	Caf20	Control
YOR341W	32	26	980.27	0.0233506	0.04907	1.52592	Control	Caf20
YAL035W	9	8	179.46	0.0233909	0.04907	1.47606	Control	Caf20
YLR432W;YAR075W	26	11	1170.35	0.0236579	0.0493619	2.13905	Caf20	Control
YBR031W	23	1	1106.79	0.0242719	0.0502716	3.36189	Caf20	Control
YLR058C	3	3	78.39	0.0244632	0.0502716	2.13061	Caf20	Control
YPR030W	3	2	44.97	0.0244846	0.0502716	1.57411	Control	Caf20
YLL034C	3	3	19.16	0.0249031	0.0507158	1.86192	Control	Caf20
YER086W	7	5	150.89	0.0250589	0.0507158	3.8238	Caf20	Control
YOL010W	2	2	71.6	0.0251335	0.0507158	2.24375	Caf20	Control
YER091C	6	5	202.54	0.0252265	0.0507158	2.75923	Caf20	Control
YIL078W	11	8	289.91	0.0262285	0.052414	5.65906	Caf20	Control
YOR212W	1	1	14.74	0.0263428	0.052414	3.64727	Control	Caf20
YLR153C	8	7	196.85	0.0265612	0.0525775	2.93742	Caf20	Control
YDR033W	3	3	63.39	0.0270586	0.0532888	3.89196	Caf20	Control
YHR074W	3	3	62.89	0.0273887	0.0536468	2.04762	Caf20	Control
YDL208W	4	4	52.31	0.0275183	0.0536468	2.44977	Caf20	Control
YDL130W	1	1	84.5	0.0279398	0.0541948	2.60143	Caf20	Control
YPL079W	11	1	346.79	0.0302516	0.0583856	9.76888	Caf20	Control
YIL109C	3	3	50.08	0.0308302	0.0592062	2.49413	Caf20	Control
YFL037W	5	5	174.67	0.0321361	0.0614085	3.27832	Caf20	Control
YOR086C	2	2	23.04	0.0325998	0.0619878	9.14803	Caf20	Control
YKL081W	4	3	67.36	0.0337318	0.0638258	4.40636	Caf20	Control
YBL039C	2	2	36.62	0.0339917	0.064004	10.9042	Caf20	Control
YKR081C	1	1	55.85	0.0343828	0.0644261	2.73688	Caf20	Control
YNR012W	1	1	14.8	0.0353101	0.065844	1.49434	Control	Caf20
YJL189W	1	1	14	0.0369059	0.0684889	9.12208	Caf20	Control
YDR432W	3	3	123.62	0.0371447	0.0686023	1.9925	Caf20	Control
YBR191W	11	1	347.12	0.0373423	0.0686387	9.55197	Caf20	Control
YGL008C;YPL036W	40	38	1713.28	0.0378778	0.069293	2.42466	Caf20	Control
YGL137W	10	8	182.52	0.0381544	0.0694698	4.27326	Caf20	Control
YML056C	20	6	951.51	0.0390517	0.0707697	2.28373	Caf20	Control
YDL051W	2	2	34.86	0.0401883	0.0724892	5.43664	Caf20	Control
YJL177W	14	1	501.99	0.0403794	0.0724951	3.42338	Caf20	Control
YJL034W	5	2	156	0.0407771	0.0728702	2.46793	Caf20	Control
YGL197W	6	1	46.51	0.0422206	0.075102	2.3041	Control	Caf20
YGR267C	1	1	46.73	0.0443111	0.0784592	2.14571	Caf20	Control
YBR127C	20	16	647.97	0.0458736	0.0808549	3.21922	Caf20	Control
YOL088C	1	1	43.27	0.0466058	0.0816632	2.20698	Caf20	Control
YEL046C	8	5	148.93	0.0467553	0.0816632	3.40145	Caf20	Control
YMR231W	1	1	46.96	0.049343	0.0857946	11.6849	Caf20	Control
YDR238C	7	5	158.59	0.0497815	0.0859265	4.5234	Caf20	Control
YCR042C	4	1	27.31	0.0498641	0.0859265	2.50076	Control	Caf20
YGR240C	21	19	748.43	0.0506221	0.0868451	2.26345	Caf20	Control
YCR028C-A	8	8	254.71	0.0513681	0.0877349	3.68519	Control	Caf20
YDR012W	23	1	1116.19	0.0528753	0.0899112	4.50225	Caf20	Control
YDL140C	9	5	97.83	0.0533215	0.0902723	3.10526	Control	Caf20
YIL075C	1	1	41.94	0.0545123	0.0917984	5.70708	Caf20	Control
YOR091W	1	1	33.17	0.0546985	0.0917984	3.62246	Caf20	Control
YNL088W	6	5	169.88	0.0562374	0.0939725	3.13996	Caf20	Control
YMR109W	2	1	45.32	0.0589978	0.0981602	20.2893	Caf20	Control
YHR193C	2	1	18.89	0.0616209	0.101982	2.26043	Control	Caf20
YLR259C	21	20	647.1	0.0620856	0.101982	1.5876	Control	Caf20
YFL018C	20	19	577.2	0.0620872	0.101982	1.90052	Control	Caf20
YDR212W	1	1	33.09	0.0632245	0.10341	7.54672	Caf20	Control
YGR159C	12	10	183.4	0.0639499	0.104155	8.30669	Control	Caf20
YNR016C	49	37	1700.06	0.0654696	0.106182	3.14514	Caf20	Control
YOL091W	2	1	15.93	0.0674847	0.108992	1.41766	Control	Caf20
YDR346C	2	2	45.78	0.0698025	0.112266	1.43359	Caf20	Control
YCR031C	12	12	383.47	0.0703437	0.112667	1.95307	Control	Caf20
YMR186W	32	4	1318.34	0.071221	0.113472	2.65142	Caf20	Control
YDL160C	1	1	44.06	0.0714347	0.113472	3.0992	Caf20	Control
YDR356W	8	6	127.71	0.0726399	0.114914	1.74946	Control	Caf20
YNL132W	9	7	174.64	0.0766561	0.120772	3.05429	Caf20	Control
YGL234W	4	3	150.79	0.0773411	0.121356	6.86651	Caf20	Control
YMR108W	3	2	72.07	0.0778457	0.121654	2.27335	Caf20	Control
YOR117W	2	1	18.79	0.0796656	0.123996	2.42598	Caf20	Control
YMR300C	2	1	27.48	0.0828111	0.128374	4.02121	Caf20	Control
YDR150W	4	2	45.6	0.0834311	0.128818	6.05258	Caf20	Control
YKR031C	3	2	42.11	0.0853425	0.130758	2.30806	Control	Caf20
YDR080W	1	1	53.65	0.0853656	0.130758	8.63027	Caf20	Control
YKR079C	2	1	41.53	0.0862023	0.131518	4.97702	Control	Caf20
YHL015W	11	11	418.81	0.0894161	0.135884	1.57419	Caf20	Control
YGR192C	23	5	815.56	0.0936687	0.141789	3.41535	Caf20	Control
YPL240C	29	1	1178.54	0.0964218	0.145386	4.80114	Caf20	Control
YOL077C	3	3	80.59	0.0983342	0.146976	2.05355	Caf20	Control
YNL064C	2	2	43.14	0.0985205	0.146976	2.1828	Caf20	Control
YGR094W	4	3	48.19	0.0986188	0.146976	12.1061	Caf20	Control
YML074C	4	3	104.32	0.103873	0.154212	20.7372	Control	Caf20
YDR099W	1	1	22.27	0.104373	0.154359	1.75622	Control	Caf20
YLL018C	8	8	276.7	0.107197	0.157491	7.02355	Caf20	Control
YGL207W	6	6	159.24	0.107306	0.157491	23.9899	Control	Caf20
YJL130C	61	53	1889.47	0.107851	0.157691	2.08623	Caf20	Control
YOR128C	3	3	67.37	0.110301	0.160593	1.54706	Caf20	Control
YDR023W	3	3	73.4	0.110668	0.160593	1.20111	Control	Caf20
YOR153W	3	2	70.34	0.113721	0.164405	7.51207	Caf20	Control
YMR049C	5	5	159.54	0.117792	0.169656	1.38577	Control	Caf20
YKR059W	5	5	137.85	0.119258	0.171129	1.95856	Caf20	Control
YKL179C	4	2	33.56	0.119781	0.171242	4.67938	Caf20	Control
YAL038W;YOR347C	44	43	1524.59	0.120564	0.171727	2.24959	Caf20	Control
YKL182W	42	42	1270.59	0.123817	0.175711	1.79531	Caf20	Control
YKR001C	25	25	754.99	0.128862	0.1822	1.7125	Control	Caf20
YNL110C	2	1	47.54	0.129437	0.182346	9.47988	Control	Caf20
YEL026W	1	1	18.1	0.139629	0.195988	6.94356	Control	Caf20
YLR148W	2	2	24.74	0.144349	0.20188	1.41151	Control	Caf20
YDL097C	1	1	35.16	0.145145	0.20226	1.91129	Caf20	Control
YDR341C	9	8	261.78	0.151405	0.210224	1.58703	Control	Caf20
YEL054C	8	8	423.52	0.159444	0.220593	1.38627	Caf20	Control
YFL039C	7	7	191.91	0.161152	0.221765	1.32481	Control	Caf20
YDR188W	1	1	37.87	0.16144	0.221765	2.94461	Caf20	Control
YBR218C	4	2	56.85	0.163163	0.223337	1.83172	Caf20	Control
YCL009C	1	1	15.13	0.179119	0.244311	2.22389	Caf20	Control
YDL171C	6	5	47.28	0.183667	0.249633	1.37976	Caf20	Control
YKL181W	1	1	46.06	0.185937	0.251831	2.33193	Caf20	Control
YCR012W	12	12	371.56	0.188735	0.254726	1.33309	Control	Caf20
YAL012W	5	3	140.16	0.195591	0.26306	2.37207	Caf20	Control
YPL231W	40	36	1223.93	0.196382	0.263207	1.77117	Caf20	Control
YOR310C	10	10	335.18	0.199358	0.266112	1.16447	Caf20	Control
YKR057W;YJL136C	4	4	117.39	0.199929	0.266112	1.5495	Control	Caf20
YMR205C	18	16	749.47	0.205584	0.270986	1.55141	Caf20	Control
YGL026C	2	2	68.72	0.205711	0.270986	2.12256	Caf20	Control
YML069W	2	2	39.14	0.205728	0.270986	120.893	Control	Caf20
YLR449W	3	2	72.98	0.206399	0.270986	1.16129	Caf20	Control
YOL086C;YMR303C	16	13	634.69	0.214623	0.280828	6.73668	Control	Caf20
YPR010C	24	21	689.05	0.218786	0.285309	1.64694	Caf20	Control
YCL034W	2	2	78.06	0.224366	0.2916	19.278	Control	Caf20
YDR251W	2	2	66.81	0.2265	0.293386	10.9847	Caf20	Control
YDR127W	8	7	175.46	0.233424	0.300526	1.72977	Caf20	Control
YLR355C	6	5	209.69	0.234169	0.300526	6.29318	Caf20	Control
YCL029C	2	1	21.53	0.234348	0.300526	2.60132	Caf20	Control
YNR053C	2	2	84.87	0.238115	0.303772	1.954	Caf20	Control
YNL161W	11	11	265.91	0.238453	0.303772	1.16631	Caf20	Control
YLR452C	2	1	20.37	0.242136	0.307408	2.57494	Control	Caf20
YLR048W;YGR214W	6	6	207.68	0.2429	0.307408	1.42641	Caf20	Control
YMR230W	3	2	34.11	0.244256	0.308114	1.36552	Caf20	Control
YBR011C	2	1	15.09	0.245726	0.308958	1.43311	Caf20	Control
YDR502C	10	1	209.21	0.25923	0.324879	1.94277	Caf20	Control
YML085C	2	2	51.82	0.264905	0.330916	2.22332	Caf20	Control
YLR249W;YNL014W	34	30	1076.65	0.26668	0.332059	3.42438	Caf20	Control
YBR010W	2	2	67.05	0.273361	0.339285	1.49114	Caf20	Control
YGR193C	9	9	229.17	0.290582	0.359501	1.62493	Control	Caf20
YKR089C	1	1	15.6	0.292301	0.360307	2.28125	Control	Caf20
YBR263W	4	3	103.63	0.293099	0.360307	3.31544	Caf20	Control
YGR218W	2	1	57.57	0.305841	0.374777	9.3278	Caf20	Control
YBL003C;YOL012C	2	2	68.58	0.313326	0.382733	1.37312	Caf20	Control
YBR084W	9	8	214.59	0.321668	0.391684	1.46662	Control	Caf20
YDL145C	9	9	254.07	0.324198	0.393523	1.19288	Control	Caf20
YLR009W	1	1	37.33	0.325843	0.39428	1.2911	Caf20	Control
YGL078C	2	2	122.56	0.332884	0.401541	1.50028	Caf20	Control
YLR324W	3	1	24.06	0.335023	0.402863	1.95357	Control	Caf20
YBL002W	8	7	220.86	0.336947	0.403917	1.26352	Caf20	Control
YDR120C	4	3	41.41	0.338698	0.40476	1.4767	Control	Caf20
YKL204W	18	17	704.8	0.33978	0.4048	1.16118	Control	Caf20
YHR021C	3	3	106.97	0.341013	0.405019	1.64924	Control	Caf20
YJR109C	5	2	113.51	0.348181	0.412263	1.61912	Caf20	Control
YBR009C	6	6	257.45	0.349777	0.412886	1.30624	Caf20	Control
YER025W	9	8	338.55	0.358894	0.422357	1.08978	Control	Caf20
YNL067W	12	1	420.23	0.368781	0.432673	1.51902	Caf20	Control
YMR116C	12	12	412.93	0.386648	0.452261	1.16091	Caf20	Control
YER036C	6	6	72.84	0.396431	0.461735	3.35275	Control	Caf20
YOR187W	3	3	146.62	0.39714	0.461735	1.15749	Control	Caf20
YOL121C	6	5	253.54	0.405036	0.467176	3.19066	Caf20	Control
YKL152C	4	3	112.49	0.407728	0.467176	1.1512	Caf20	Control
YMR229C	48	40	1207.13	0.408404	0.467176	1.19831	Control	Caf20
YOR167C	5	5	230.29	0.408454	0.467176	1.23918	Control	Caf20
YDR064W	12	12	367.54	0.408822	0.467176	1.31152	Control	Caf20
YLR027C	3	2	151.57	0.409081	0.467176	3.23142	Caf20	Control
YML032C	8	8	290.78	0.415346	0.472931	3.56284	Control	Caf20
YBR079C	4	2	150.73	0.419708	0.476492	1.43144	Control	Caf20
YLR175W	8	8	158.76	0.424077	0.480041	1.15083	Control	Caf20
YGR285C	2	2	61.22	0.427632	0.482649	1.00999	Caf20	Control
YDR190C	3	3	116.89	0.453565	0.510426	1.08023	Caf20	Control
YHR064C	4	4	180.3	0.455321	0.510912	1.43967	Control	Caf20
YBR283C	2	1	20.34	0.461743	0.516616	2.49096	Caf20	Control
YDR345C	2	1	56.62	0.498369	0.555984	1.68614	Caf20	Control
YMR246W	1	1	71.38	0.510531	0.567911	6.22907	Caf20	Control
YDL055C	12	11	341.15	0.536682	0.595286	1.37937	Caf20	Control
YGL206C	5	5	150.63	0.540153	0.597418	1.30434	Control	Caf20
YCL028W	2	2	73.55	0.570943	0.629668	2.15216	Control	Caf20
YOR361C	2	2	61.47	0.575124	0.63119	1.2181	Control	Caf20
YOR298C-A	1	1	37.63	0.575593	0.63119	1.01976	Control	Caf20
YNL312W	1	1	28.42	0.59101	0.64626	8.819	Control	Caf20
YPL235W	2	2	58.4	0.596099	0.649984	1.08408	Caf20	Control
YPR183W	2	2	43.15	0.603776	0.6565	1.12485	Control	Caf20
YBR154C	3	2	52.12	0.642667	0.696824	1.13385	Control	Caf20
YPL050C	2	1	53.51	0.67578	0.730676	1.11453	Control	Caf20
YNL290W	1	1	26.26	0.678242	0.731289	1.16353	Control	Caf20
YDL143W	7	7	247.24	0.687623	0.739339	1.23437	Caf20	Control
YER043C	9	9	300.1	0.700668	0.751272	1.1351	Control	Caf20
YMR146C	1	1	14.01	0.711982	0.761288	1.64074	Control	Caf20
YPR080W	34	29	1233.46	0.732116	0.780543	1.11068	Caf20	Control
YML126C	1	1	62.49	0.734034	0.780543	4.00488	Caf20	Control
YBL076C	11	9	471.31	0.738148	0.782762	3.5564	Caf20	Control
YEL020C	2	2	55	0.758543	0.802185	1.00714	Control	Caf20
YAL005C	30	4	1483.93	0.766277	0.80815	1.02244	Control	Caf20
YHR027C	6	6	65.36	0.771328	0.81126	1.06799	Control	Caf20
YKL060C	5	5	142.4	0.773988	0.811846	1.17347	Control	Caf20
YGR090W	15	14	401.07	0.786564	0.822802	1.13925	Caf20	Control
YEL034W	1	1	15.43	0.796001	0.830351	11.921	Control	Caf20
YHR183W	1	1	31.19	0.798084	0.830351	1.22385	Control	Caf20
YBL099W	8	5	142.23	0.808728	0.836863	1.03109	Caf20	Control
YFR001W	2	2	76.84	0.809832	0.836863	1.3466	Caf20	Control
YEL071W	1	1	66.37	0.810847	0.836863	1.10312	Caf20	Control
YGL202W	5	3	110.61	0.815803	0.837548	1.06148	Caf20	Control
YNR054C	1	1	14.77	0.81585	0.837548	95.1093	Control	Caf20
YER059W	1	1	37.52	0.83771	0.857708	47.9341	Control	Caf20
YBR143C	3	2	46.84	0.894588	0.913521	1.41873	Control	Caf20
YMR309C	6	6	202.89	0.910786	0.927608	2.25621	Control	Caf20
YDL185W	10	9	239.19	0.913664	0.92809	1.1292	Control	Caf20
YJR077C	1	1	27.41	0.935398	0.947674	3.05256	Caf20	Control
YJR045C	19	17	738.64	0.955133	0.965135	1.00154	Caf20	Control
YBL030C	1	1	18.02	0.961876	0.96941	6.65795	Caf20	Control
YHR143W-A	2	1	78.5	0.972079	0.97576	1.15831	Caf20	Control
YPR110C	4	4	81.29	0.973232	0.97576	1.23735	Control	Caf20
YOR340C	2	2	49.96	0.987692	0.987692	2.27654	Control	Caf20

## Sheet: Dataset2.  Eap1-TAP protein IP
Accession	Peptide.count	Peptides.used.for.quantitation	Confidence.score	Anova..p.	FDR	Max.fold.change	Highest.mean.condition	Lowest.mean.condition
YKL204W	18	17	704.8	1.3e-09	5.018e-07	115.298	Eap1	Control
YGR034W	12	2	295.53	1.68e-08	3.2424e-06	48.6372	Eap1	Control
YGL147C	15	4	554.24	1.35e-07	1.7177e-05	26.317	Eap1	Control
YPR043W	7	6	295.15	1.78e-07	1.7177e-05	27.318	Eap1	Control
YKL009W	2	2	23.71	2.41e-07	1.86052e-05	5.52261	Eap1	Control
YOR096W	8	5	204.36	3.57e-07	2.2967e-05	7.77045	Eap1	Control
YGR085C	12	11	505.91	7.28e-07	4.0144e-05	6.26158	Eap1	Control
YER006W	2	1	65.28	1.02e-06	4.9022e-05	191.164	Eap1	Control
YLR344W	12	2	298.86	1.21e-06	4.9022e-05	19.4618	Eap1	Control
YNL096C	9	5	289.03	1.27e-06	4.9022e-05	7.657	Eap1	Control
YDL075W;YLR406C	8	8	228.57	1.51e-06	4.98583e-05	17.7624	Eap1	Control
YIR020W-A	1	1	16.82	1.55e-06	4.98583e-05	134.338	Eap1	Control
YCL011C	2	2	81.49	2.06e-06	6.11662e-05	23.6226	Eap1	Control
YGL173C	22	18	728.24	2.48e-06	6.39312e-05	7.72077	Eap1	Control
YPL106C	10	6	276.23	2.6e-06	6.39312e-05	12.5334	Eap1	Control
YIL069C	10	10	330.39	2.65e-06	6.39312e-05	8.97716	Eap1	Control
YMR019W	1	1	17.29	4.6e-06	0.000104447	156.628	Eap1	Control
YPL093W	6	5	72.26	4.93e-06	0.000104626	8.35569	Eap1	Control
YLR340W	15	15	544.34	5.15e-06	0.000104626	4.87635	Eap1	Control
YCL059C	4	3	92.28	6.97e-06	0.000134521	10.7033	Eap1	Control
YLR325C	3	3	133.55	9.03e-06	0.00016598	7.42169	Eap1	Control
YBL087C	10	10	426.05	1.21e-05	0.000211461	6.19489	Eap1	Control
YGL031C	9	2	433.86	1.26e-05	0.000211461	34.5701	Eap1	Control
YHR089C	3	2	75.22	1.44e-05	0.0002316	8.83271	Eap1	Control
YDL213C	2	2	76.4	1.59e-05	0.000245496	20.5323	Eap1	Control
YJL190C	9	9	485.31	3.11e-05	0.000448904	10.7511	Eap1	Control
YML024W	10	10	429.01	3.14e-05	0.000448904	15.7469	Eap1	Control
YMR242C	20	20	849.1	3.51e-05	0.000477841	7.31508	Eap1	Control
YDL136W	7	7	400.63	3.59e-05	0.000477841	11.3359	Eap1	Control
YLL045C	25	7	947.93	3.78e-05	0.00048636	8.75513	Eap1	Control
YGR054W	2	2	23.46	4.26e-05	0.000530439	13.7373	Eap1	Control
YLR448W	18	5	693.44	4.67e-05	0.000555606	6.86158	Eap1	Control
YOL120C	13	9	534.03	4.75e-05	0.000555606	10.1263	Eap1	Control
YOR369C	5	4	172.1	5.34e-05	0.000606247	3.14879	Eap1	Control
YGL135W	19	18	815.75	5.64e-05	0.000612384	6.52503	Eap1	Control
YNL069C	15	10	430.06	5.81e-05	0.000612384	9.39936	Eap1	Control
YKL006W	13	1	586.77	5.87e-05	0.000612384	23.427	Eap1	Control
YOL040C	5	5	168	6.16e-05	0.000625726	10.769	Eap1	Control
YGR271C-A	4	3	75.74	7.09e-05	0.000701728	27.8739	Eap1	Control
YLR216C	3	3	81.83	7.57e-05	0.000728693	2.26544	Eap1	Control
YDL083C	9	9	329.3	7.74e-05	0.000728693	11.1083	Eap1	Control
YLR029C;YMR121C	13	11	455.81	8.45e-05	0.000776595	8.70938	Eap1	Control
YBL072C	11	9	413.11	8.94e-05	0.000802521	9.04087	Eap1	Control
YGR118W	7	6	311.6	9.47e-05	0.000814942	38.8193	Eap1	Control
YBR257W	2	2	24.06	9.79e-05	0.000814942	13.0999	Control	Eap1
YBL092W	8	7	275.17	9.96e-05	0.000814942	12.6214	Eap1	Control
YOL127W	15	15	681.07	0.000100259	0.000814942	7.11954	Eap1	Control
YHR010W;YDR471W	9	8	325.86	0.00010134	0.000814942	8.63952	Eap1	Control
YAL036C	8	5	226.35	0.00010563	0.000819285	15.7934	Eap1	Control
YNL178W	23	20	917	0.000106125	0.000819285	10.0344	Eap1	Control
YJL074C	4	2	30.68	0.000111464	0.000843629	10.7686	Control	Eap1
YGL030W	12	11	508.51	0.000168341	0.00121022	6.2197	Eap1	Control
YIL052C	5	3	177.77	0.000170129	0.00121022	17.6197	Eap1	Control
YIL133C	13	8	378.56	0.000170287	0.00121022	6.54725	Eap1	Control
YLR003C	1	1	35.56	0.000172441	0.00121022	99.5464	Eap1	Control
YMR207C	2	1	86.99	0.000177804	0.00122558	9.70789	Control	Eap1
YBR121C	2	1	20.4	0.000194814	0.00131927	19.7466	Control	Eap1
YML073C	19	6	679.87	0.000205953	0.00137065	8.54621	Eap1	Control
YAR073W	6	1	243.42	0.000209688	0.00137186	4.1062	Control	Eap1
YLR167W;YIL148W	9	9	312.6	0.000217893	0.00138022	6.45119	Eap1	Control
YCR077C	1	1	56.36	0.000218393	0.00138022	10.1932	Control	Eap1
YMR142C	14	1	444.24	0.000221693	0.00138022	8.47499	Eap1	Control
YLR150W	9	8	304.5	0.000299375	0.00182957	4.55274	Eap1	Control
YDL082W	14	1	412.79	0.000303349	0.00182957	20.1172	Eap1	Control
YER131W	3	2	59.23	0.000373978	0.00220709	13.5364	Eap1	Control
YOR243C	4	2	51.44	0.00038144	0.00220709	16.9879	Eap1	Control
YDR496C	4	3	68.5	0.000383095	0.00220709	5.70267	Control	Eap1
YNL248C	6	5	59.19	0.000419724	0.00238255	18.5661	Eap1	Control
YOR234C	10	2	292.18	0.000439981	0.00246134	9.16856	Eap1	Control
YJR123W	6	6	256.63	0.000504683	0.00274734	4.94331	Eap1	Control
YJR145C	21	19	741.43	0.000511573	0.00274734	11.7259	Eap1	Control
YOR182C	1	1	33.96	0.000512458	0.00274734	128.699	Eap1	Control
YDL007W	2	2	41.17	0.000526697	0.002785	4.92824	Control	Eap1
YBR189W;YPL081W	18	12	604.19	0.000551406	0.00283798	9.20674	Eap1	Control
YKL107W	1	1	29.61	0.00055158	0.00283798	26.0709	Control	Eap1
YOR063W	23	19	891.99	0.000558774	0.00283798	8.61336	Eap1	Control
YLR180W	14	5	410.84	0.000597379	0.00297386	4.92374	Control	Eap1
YGR264C	5	4	134.25	0.000600936	0.00297386	2.99324	Control	Eap1
YOL039W	1	1	56.23	0.000621805	0.00303819	11.0065	Eap1	Control
YBR025C	3	3	59.21	0.000636179	0.00306956	4.59103	Eap1	Control
YPL143W	10	2	287.15	0.000659269	0.0031417	6.85415	Eap1	Control
YPR181C	6	6	144.16	0.000679486	0.00319856	4.31131	Eap1	Control
YGR027C	6	5	236.3	0.000699259	0.00325198	10.0994	Eap1	Control
YLR075W	15	15	487.94	0.000730281	0.00333076	11.4791	Eap1	Control
YPL242C	2	2	26.44	0.00073863	0.00333076	1.88638	Control	Eap1
YLR061W	4	3	140.21	0.000742087	0.00333076	11.804	Eap1	Control
YIL018W	13	13	404.14	0.000890878	0.00395263	8.60684	Eap1	Control
YMR080C	10	8	226.57	0.000940546	0.00412558	5.17757	Eap1	Control
YNL016W	3	2	33.63	0.000958521	0.00415718	6.0494	Control	Eap1
YLR441C	28	5	825.45	0.000980647	0.00420589	9.45031	Eap1	Control
YLR258W	1	1	25.27	0.00100728	0.00427264	38.4356	Eap1	Control
YOL010W	2	2	71.6	0.00110884	0.0046523	4.93428	Eap1	Control
YHR052W	1	1	13.68	0.0011213	0.00465399	3.86866	Eap1	Control
YGL123W	10	9	436.26	0.00113859	0.00465666	9.21961	Eap1	Control
YOR276W	7	7	248.24	0.00115055	0.00465666	14.3054	Control	Eap1
YLR276C	2	1	33.52	0.00115813	0.00465666	25.7393	Eap1	Control
YGL120C	4	4	118.06	0.00118637	0.00472101	3.91986	Eap1	Control
YPL090C	17	15	638.94	0.00121426	0.00475252	6.94159	Eap1	Control
YML026C	10	9	334.92	0.00121891	0.00475252	10.6026	Eap1	Control
YDR381W	7	7	265.84	0.00134968	0.00520976	6.76583	Eap1	Control
YMR109W	2	1	45.32	0.00140255	0.00534507	32.9017	Eap1	Control
YPL043W	7	7	114.83	0.00141243	0.00534507	7.22611	Eap1	Control
YNL088W	6	5	169.88	0.00158229	0.00592976	9.4103	Eap1	Control
YMR032W	2	1	20.3	0.00172888	0.00641679	7.51409	Control	Eap1
YER165W	27	25	919.81	0.0018417	0.00677044	2.45928	Eap1	Control
YHR174W;YGR254W	13	13	434.49	0.00189087	0.00688563	2.4529	Control	Eap1
YOR133W	43	41	1441.34	0.00190954	0.00688861	1.85653	Eap1	Control
YGL076C	23	3	838.39	0.0019894	0.00705384	9.35402	Eap1	Control
YGL103W	8	8	207.05	0.00199189	0.00705384	8.72114	Eap1	Control
YDR341C	9	8	261.78	0.00205918	0.00722584	4.66373	Control	Eap1
YHL034C	5	5	95.07	0.00208801	0.007261	3.91552	Eap1	Control
YBR029C	1	1	21.54	0.0022028	0.00759179	6.95943	Eap1	Control
YLR432W;YAR075W	26	11	1170.35	0.00225177	0.0076919	3.36423	Eap1	Control
YML063W	28	5	832.74	0.00228787	0.00774664	6.76527	Eap1	Control
YPL249C-A	11	2	460.4	0.00249225	0.00836275	22.0177	Eap1	Control
YOR204W	14	11	417.4	0.00251316	0.00836275	3.81403	Eap1	Control
YDL130W	1	1	84.5	0.00254105	0.00838328	5.0757	Eap1	Control
YBL027W	11	10	499.2	0.00270437	0.00881032	9.55202	Eap1	Control
YBL024W	2	1	63.02	0.00271614	0.00881032	12.6891	Eap1	Control
YLR384C	3	2	58.44	0.00299276	0.0096159	3.34738	Control	Eap1
YGR186W	3	2	30.6	0.00301431	0.0096159	3.01034	Control	Eap1
YKL180W	15	2	588.6	0.00306043	0.009683	6.31829	Eap1	Control
YBL002W	8	7	220.86	0.00312088	0.00979399	3.32049	Eap1	Control
YLR185W	1	1	23.67	0.00314884	0.00980205	37.6796	Eap1	Control
YHL001W	13	1	574.31	0.00324735	0.0100278	98.1051	Eap1	Control
YDL208W	4	4	52.31	0.0035798	0.0109467	5.72073	Eap1	Control
YKL054C	2	2	23.75	0.00361123	0.0109467	3.11609	Control	Eap1
YEL054C	8	8	423.52	0.00364503	0.0109467	2.24501	Eap1	Control
YPL126W	1	1	41.54	0.0036867	0.0109467	23.9383	Eap1	Control
YML056C	20	6	951.51	0.0036867	0.0109467	3.93638	Eap1	Control
YKL104C	8	8	294.73	0.00382962	0.0112786	2.65694	Eap1	Control
YLR048W;YGR214W	6	6	207.68	0.00385694	0.0112786	1.90699	Eap1	Control
YOL041C	5	5	149.25	0.00399047	0.0115814	5.46141	Eap1	Control
YNL175C	2	1	22.12	0.00440987	0.0127031	9.81449	Eap1	Control
YOR124C	2	1	28.58	0.00446515	0.012767	5.07653	Eap1	Control
YDL014W	15	12	440.3	0.00461226	0.0130139	3.38573	Eap1	Control
YDR025W	9	8	293.17	0.00461892	0.0130139	5.75439	Eap1	Control
YPL020C	4	1	43.59	0.00478396	0.0132959	4.88385	Control	Eap1
YBR031W	23	1	1106.79	0.00478789	0.0132959	4.91213	Eap1	Control
YOR198C	8	8	168.11	0.00495354	0.0136412	3.96415	Eap1	Control
YBL076C	11	9	471.31	0.00498293	0.0136412	3.31458	Control	Eap1
YIL033C	3	3	48.8	0.00503775	0.0136942	2.00471	Control	Eap1
YJL033W	3	3	159.17	0.00544398	0.0146949	32.1995	Eap1	Control
YDL040C	4	4	122.21	0.0056232	0.0150733	5.74649	Eap1	Control
YNL112W	9	6	218.57	0.00571904	0.0152245	1.88499	Eap1	Control
YHL033C	23	5	934.07	0.00579544	0.0153222	6.12022	Eap1	Control
YBR221C	21	21	1002.78	0.00652293	0.0171282	2.16908	Control	Eap1
YLR422W	5	1	18.88	0.00707635	0.0184559	5.33813	Eap1	Control
YGR148C	9	2	389.7	0.00716994	0.0185067	39.7615	Eap1	Control
YFL039C	7	7	191.91	0.00719171	0.0185067	1.89254	Control	Eap1
YOR004W	2	2	35.99	0.00735899	0.0188117	23.2306	Eap1	Control
YDL229W	46	3	2249.33	0.00752733	0.0191155	1.51492	Eap1	Control
YGR178C	2	2	50.4	0.0076971	0.0194188	2.25126	Control	Eap1
YOR151C	4	2	63.33	0.00811624	0.0203433	2.39732	Control	Eap1
YKR081C	1	1	55.85	0.00852266	0.0211467	3.80199	Eap1	Control
YCL037C	6	5	348.08	0.00854634	0.0211467	4.3136	Eap1	Control
YDR457W	3	2	32.02	0.00872391	0.0214486	2.14707	Control	Eap1
YDL140C	9	5	97.83	0.00983566	0.0240289	5.10785	Control	Eap1
YJL177W	14	1	501.99	0.0100714	0.0241699	5.04698	Eap1	Control
YDR012W	23	1	1116.19	0.0100795	0.0241699	8.30415	Eap1	Control
YHR020W	10	9	262.94	0.0100812	0.0241699	3.52399	Eap1	Control
YDR099W	1	1	22.27	0.0102204	0.0243524	2.27198	Control	Eap1
YOL139C	19	16	1023.05	0.0105252	0.0249247	2.86841	Eap1	Control
YDR050C	1	1	23.5	0.0107831	0.0253797	1.63918	Control	Eap1
YPL131W	4	4	137.57	0.0110412	0.0258297	1.59315	Control	Eap1
YHL015W	11	11	418.81	0.0115298	0.0268102	2.27345	Eap1	Control
YDR172W	2	2	28.15	0.0120272	0.0277994	10.0132	Eap1	Control
YDR060W	2	2	44.68	0.0128268	0.029471	6.19694	Control	Eap1
YBR248C	2	2	21.85	0.0134979	0.0308296	1.6258	Control	Eap1
YJL052W	10	1	375.07	0.0147003	0.0333783	1.80422	Control	Eap1
YMR033W	3	2	37.82	0.0152603	0.0344472	1.92663	Control	Eap1
YOR187W	3	3	146.62	0.0157378	0.0353186	1.54335	Control	Eap1
YPL079W	11	1	346.79	0.016311	0.0363933	14.8223	Eap1	Control
YLR342W;YGR032W	12	11	292.97	0.0166669	0.0369631	3.51023	Eap1	Control
YLR248W	2	2	25.65	0.0168268	0.0369631	20.6164	Control	Eap1
YDL051W	2	2	34.86	0.016889	0.0369631	12.8119	Eap1	Control
YHR193C	2	1	18.89	0.0169494	0.0369631	2.8967	Control	Eap1
YBR009C	6	6	257.45	0.0173408	0.0376042	3.98107	Eap1	Control
YBR191W	11	1	347.12	0.0180046	0.0388256	15.9681	Eap1	Control
YJL189W	1	1	14	0.018562	0.0398051	16.0094	Eap1	Control
YDR432W	3	3	123.62	0.0187513	0.0399889	2.55886	Eap1	Control
YLR419W	6	4	76.23	0.0189049	0.0400949	1.81071	Control	Eap1
YER178W	46	46	1534.55	0.019214	0.040528	2.17125	Control	Eap1
YFR001W	2	2	76.84	0.0197478	0.0413683	2.89752	Eap1	Control
YBL003C;YOL012C	2	2	68.58	0.0198268	0.0413683	3.73424	Eap1	Control
YDR251W	2	2	66.81	0.0217363	0.0451087	11.9689	Eap1	Control
YOR091W	1	1	33.17	0.0219058	0.0452173	7.42326	Eap1	Control
YLR259C	21	20	647.1	0.0227409	0.0466915	1.98055	Control	Eap1
YNR016C	49	37	1700.06	0.0233958	0.047782	1.8329	Eap1	Control
YMR012W	4	4	135.68	0.0235937	0.0479324	3.2168	Eap1	Control
YOR207C	5	3	94.03	0.0242864	0.0490374	2.62611	Control	Eap1
YNL071W	22	20	962.46	0.0243917	0.0490374	2.69328	Control	Eap1
YOR086C	2	2	23.04	0.0249466	0.0498933	11.8272	Eap1	Control
YHR027C	6	6	65.36	0.0252575	0.0502545	3.02211	Control	Eap1
YGL137W	10	8	182.52	0.0255022	0.0504812	4.01293	Eap1	Control
YKL133C	2	1	16.8	0.0272368	0.0536399	3.34721	Eap1	Control
YGR159C	12	10	183.4	0.0287454	0.0563236	11.5053	Control	Eap1
YOR341W	32	26	980.27	0.0311937	0.0605818	1.38617	Control	Eap1
YHR074W	3	3	62.89	0.0312326	0.0605818	1.92984	Eap1	Control
YAL038W;YOR347C	44	43	1524.59	0.0333002	0.0642693	2.19239	Eap1	Control
YGL245W	10	7	364.37	0.0344307	0.0661207	2.07729	Eap1	Control
YPR010C	24	21	689.05	0.0349123	0.0667135	2.365	Eap1	Control
YKR031C	3	2	42.11	0.036834	0.070039	2.78062	Control	Eap1
YDR482C	1	1	14.98	0.0374026	0.0707716	3.37799	Control	Eap1
YOL088C	1	1	43.27	0.0385079	0.0725076	3.34253	Eap1	Control
YDR033W	3	3	63.39	0.0403718	0.0756046	3.90678	Eap1	Control
YLR197W	11	9	327.86	0.0405444	0.0756046	2.81079	Eap1	Control
YFL018C	20	19	577.2	0.0427333	0.0789946	1.96745	Control	Eap1
YKL014C	8	3	49.01	0.0427717	0.0789946	2.53416	Control	Eap1
YPR074C	3	2	40.55	0.0438479	0.0805966	2.65912	Control	Eap1
YDR130C	2	1	14.42	0.045015	0.0823497	1.77383	Control	Eap1
YGL202W	5	3	110.61	0.0462554	0.0842198	3.66519	Control	Eap1
YKR001C	25	25	754.99	0.0471825	0.0855044	2.03291	Control	Eap1
YIL109C	3	3	50.08	0.0480919	0.0864015	2.27474	Eap1	Control
YDL160C	1	1	44.06	0.0481252	0.0864015	4.3685	Eap1	Control
YGL197W	6	1	46.51	0.0492515	0.0880143	2.25374	Control	Eap1
YNL110C	2	1	47.54	0.0528344	0.0939818	15.9849	Control	Eap1
YCR012W	12	12	371.56	0.0537552	0.0951813	1.51093	Control	Eap1
YNL290W	1	1	26.26	0.0547541	0.0965072	5.70181	Eap1	Control
YOR298C-A	1	1	37.63	0.0556355	0.097615	2.55254	Eap1	Control
YDL126C	14	12	393.44	0.0567408	0.0991039	1.63001	Eap1	Control
YJL034W	5	2	156	0.0643878	0.111795	1.92885	Eap1	Control
YPL198W	21	1	785.78	0.0647459	0.111795	12.3403	Eap1	Control
YDR080W	1	1	53.65	0.0648756	0.111795	3.58288	Eap1	Control
YPL032C	2	2	39.31	0.0662483	0.113653	5.38133	Eap1	Control
YBR010W	2	2	67.05	0.0685764	0.117126	3.66922	Eap1	Control
YDR238C	7	5	158.59	0.0693645	0.11795	2.65444	Eap1	Control
YBR011C	2	1	15.09	0.070051	0.118595	1.86003	Eap1	Control
YOR212W	1	1	14.74	0.0708397	0.119407	4.9003	Control	Eap1
YDL143W	7	7	247.24	0.0716127	0.120185	1.76705	Control	Eap1
YOL121C	6	5	253.54	0.0797633	0.133284	6.89944	Eap1	Control
YKL035W	5	3	72.58	0.081139	0.134559	1.52469	Eap1	Control
YDL097C	1	1	35.16	0.0812233	0.134559	1.90847	Eap1	Control
YDR346C	2	2	45.78	0.083457	0.137668	1.00128	Control	Eap1
YPR030W	3	2	44.97	0.083827	0.13769	1.44951	Control	Eap1
YDR120C	4	3	41.41	0.0870437	0.142368	1.94379	Control	Eap1
YLL034C	3	3	19.16	0.089186	0.145257	1.5903	Control	Eap1
YEL031W	4	3	32.82	0.0902815	0.146423	1.40902	Control	Eap1
YBL039C	2	2	36.62	0.0950195	0.153462	3.24043	Eap1	Control
YCR031C	12	12	383.47	0.0958023	0.154082	1.74736	Control	Eap1
YOR167C	5	5	230.29	0.0973823	0.155584	1.57068	Eap1	Control
YGL206C	5	5	150.63	0.0975426	0.155584	2.45672	Control	Eap1
YNL161W	11	11	265.91	0.0984607	0.156403	1.22707	Control	Eap1
YCL029C	2	1	21.53	0.100106	0.15777	4.08159	Eap1	Control
YLR009W	1	1	37.33	0.100139	0.15777	1.80286	Eap1	Control
YLR044C;YGR087C;YLR134W	19	19	744.61	0.10122	0.158824	1.51701	Eap1	Control
YJR064W	3	3	43.62	0.103534	0.161786	1.39188	Control	Eap1
YLR324W	3	1	24.06	0.103945	0.161786	3.54548	Control	Eap1
YNL064C	2	2	43.14	0.104567	0.162099	2.07002	Eap1	Control
YDR064W	12	12	367.54	0.106771	0.164855	1.51957	Eap1	Control
YBL099W	8	5	142.23	0.107443	0.165011	2.99563	Control	Eap1
YER021W	3	2	141.85	0.107728	0.165011	1.85562	Eap1	Control
YOL077C	3	3	80.59	0.10953	0.167109	1.96055	Eap1	Control
YCL034W	2	2	78.06	0.114609	0.173517	43.5946	Control	Eap1
YMR231W	1	1	46.96	0.114629	0.173517	4.69013	Eap1	Control
YDR502C	10	1	209.21	0.11605	0.174982	4.19785	Eap1	Control
YNL132W	9	7	174.64	0.116534	0.175027	3.28209	Eap1	Control
YKR079C	2	1	41.53	0.117397	0.175641	7.87732	Control	Eap1
YMR049C	5	5	159.54	0.119787	0.178524	1.81475	Control	Eap1
YMR116C	12	12	412.93	0.122927	0.1825	1.64159	Eap1	Control
YCR042C	4	1	27.31	0.12922	0.191107	1.96256	Control	Eap1
YDR150W	4	2	45.6	0.134029	0.197463	2.46447	Eap1	Control
YPL061W	7	7	132.89	0.138477	0.202674	1.59351	Eap1	Control
YEL026W	1	1	18.1	0.138616	0.202674	4.29394	Control	Eap1
YKL081W	4	3	67.36	0.141677	0.206367	2.14481	Eap1	Control
YOL091W	2	1	15.93	0.14404	0.20902	1.31695	Control	Eap1
YMR083W	3	1	38.27	0.144823	0.20937	6.06316	Eap1	Control
YGR090W	15	14	401.07	0.149193	0.214883	2.05074	Eap1	Control
YDL145C	9	9	254.07	0.151032	0.216108	1.70162	Control	Eap1
YIL078W	11	8	289.91	0.151164	0.216108	1.57328	Eap1	Control
YEL020C	2	2	55	0.152584	0.217334	1.67521	Control	Eap1
YBR263W	4	3	103.63	0.154701	0.219538	1.68572	Eap1	Control
YGR204W	11	7	279.18	0.159067	0.224907	1.48362	Eap1	Control
YDR356W	8	6	127.71	0.168959	0.238022	1.58177	Control	Eap1
YOL086C;YMR303C	16	13	634.69	0.169934	0.238526	7.36896	Control	Eap1
YDL171C	6	5	47.28	0.172232	0.240303	1.48818	Eap1	Control
YKR089C	1	1	15.6	0.172445	0.240303	3.31649	Control	Eap1
YMR230W	3	2	34.11	0.175357	0.243481	1.47194	Eap1	Control
YKR059W	5	5	137.85	0.178848	0.247438	1.26636	Eap1	Control
YDL185W	10	9	239.19	0.181191	0.249784	2.2023	Control	Eap1
YER091C	6	5	202.54	0.182348	0.250485	1.49993	Eap1	Control
YNL067W	12	1	420.23	0.188795	0.258166	2.63038	Eap1	Control
YGR218W	2	1	57.57	0.189277	0.258166	5.43036	Control	Eap1
YMR309C	6	6	202.89	0.192811	0.26206	15.7519	Control	Eap1
YKL152C	4	3	112.49	0.193736	0.262393	1.42297	Control	Eap1
YLR452C	2	1	20.37	0.196104	0.264672	2.92178	Control	Eap1
YMR146C	1	1	14.01	0.198247	0.266632	1.17614	Eap1	Control
YNL209W	46	3	2363.5	0.200189	0.268309	1.20426	Eap1	Control
YDR345C	2	1	56.62	0.201254	0.268803	1.774	Control	Eap1
YNR053C	2	2	84.87	0.205513	0.273545	2.12004	Eap1	Control
YLR148W	2	2	24.74	0.206345	0.273708	1.61256	Control	Eap1
YLR175W	8	8	158.76	0.208957	0.276225	1.27555	Eap1	Control
YBR154C	3	2	52.12	0.21449	0.282571	1.58957	Eap1	Control
YLR153C	8	7	196.85	0.21854	0.286926	2.13096	Eap1	Control
YLR027C	3	2	151.57	0.224375	0.293588	1.63337	Eap1	Control
YML074C	4	3	104.32	0.239432	0.312232	9.82525	Control	Eap1
YBR084W	9	8	214.59	0.243513	0.316471	1.54435	Control	Eap1
YNR054C	1	1	14.77	0.244322	0.316471	477.975	Control	Eap1
YGR192C	23	5	815.56	0.247808	0.319912	1.86613	Eap1	Control
YHR021C	3	3	106.97	0.252201	0.324499	1.79794	Control	Eap1
YDR212W	1	1	33.09	0.253377	0.324928	1.96606	Eap1	Control
YPR110C	4	4	81.29	0.268314	0.342944	1.39186	Eap1	Control
YOR185C	4	4	81.58	0.269871	0.343796	1.65632	Eap1	Control
YNR012W	1	1	14.8	0.277324	0.351353	1.60966	Control	Eap1
YOR153W	3	2	70.34	0.277624	0.351353	3.13561	Eap1	Control
YJR144W	12	11	311.88	0.284443	0.358807	2.07343	Control	Eap1
YHR143W-A	2	1	78.5	0.285608	0.359103	1.39624	Eap1	Control
YOR128C	3	3	67.37	0.28717	0.359894	1.85699	Control	Eap1
YKL179C	4	2	33.56	0.293193	0.366254	1.53218	Eap1	Control
YPL240C	29	1	1178.54	0.298395	0.370723	1.40884	Eap1	Control
YML085C	2	2	51.82	0.298691	0.370723	1.25357	Eap1	Control
YGL207W	6	6	159.24	0.30084	0.372193	10.1061	Control	Eap1
YER025W	9	8	338.55	0.302381	0.372904	1.05295	Eap1	Control
YAL005C	30	4	1483.93	0.310818	0.382088	1.14664	Control	Eap1
YKL181W	1	1	46.06	0.324889	0.398118	2.5913	Eap1	Control
YOR340C	2	2	49.96	0.32895	0.401818	1.13225	Control	Eap1
YDR188W	1	1	37.87	0.338675	0.412393	1.08921	Eap1	Control
YAL035W	9	8	179.46	0.339897	0.41258	1.16664	Control	Eap1
YER059W	1	1	37.52	0.346593	0.419389	Inf	Control	Eap1
YHR183W	1	1	31.19	0.351705	0.424244	1.55181	Control	Eap1
YGL234W	4	3	150.79	0.361807	0.43507	1.0989	Eap1	Control
YER086W	7	5	150.89	0.394173	0.471694	1.36377	Eap1	Control
YML069W	2	2	39.14	0.394707	0.471694	38.1967	Control	Eap1
YER036C	6	6	72.84	0.396963	0.472194	3.21952	Control	Eap1
YLR222C	1	1	26.17	0.397573	0.472194	3.97759	Eap1	Control
YLL018C	8	8	276.7	0.42468	0.502842	1.36527	Eap1	Control
YOR117W	2	1	18.79	0.428679	0.506025	1.57341	Eap1	Control
YLR058C	3	3	78.39	0.439417	0.517119	1.17546	Eap1	Control
YDR023W	3	3	73.4	0.445549	0.521915	1.08903	Control	Eap1
YEL046C	8	5	148.93	0.446197	0.521915	1.25897	Eap1	Control
YMR246W	1	1	71.38	0.450338	0.525167	2.17419	Eap1	Control
YEL071W	1	1	66.37	0.455312	0.529369	1.41151	Control	Eap1
YJR045C	19	17	738.64	0.483181	0.560084	1.21384	Control	Eap1
YLR449W	3	2	72.98	0.500103	0.577964	1.4177	Control	Eap1
YFL037W	5	5	174.67	0.507198	0.579504	1.70687	Eap1	Control
YGR285C	2	2	61.22	0.508129	0.579504	1.10672	Control	Eap1
YKL060C	5	5	142.4	0.508368	0.579504	1.29027	Control	Eap1
YLL024C;YBL075C;YER103W	36	9	1518.74	0.508902	0.579504	1.14805	Eap1	Control
YOR361C	2	2	61.47	0.508942	0.579504	2.66093	Control	Eap1
YGR094W	4	3	48.19	0.513128	0.581892	1.29151	Eap1	Control
YPL050C	2	1	53.51	0.514055	0.581892	1.27996	Eap1	Control
YPL231W	40	36	1223.93	0.554301	0.625614	1.31274	Control	Eap1
YNL312W	1	1	28.42	0.556064	0.625775	1.73601	Control	Eap1
YGR267C	1	1	46.73	0.558115	0.626257	1.05366	Eap1	Control
YLR355C	6	5	209.69	0.579518	0.648261	1.38129	Eap1	Control
YMR229C	48	40	1207.13	0.581084	0.648261	1.1193	Eap1	Control
YLR249W;YNL014W	34	30	1076.65	0.602214	0.669898	1.50008	Eap1	Control
YJR077C	1	1	27.41	0.605399	0.671506	2.14987	Control	Eap1
YDR127W	8	7	175.46	0.617234	0.682672	1.02262	Eap1	Control
YDL055C	12	11	341.15	0.622934	0.687008	1.27516	Control	Eap1
YGR240C	21	19	748.43	0.625147	0.687484	1.39061	Eap1	Control
YAR007C	14	14	448.63	0.654475	0.717691	1.51688	Control	Eap1
YER043C	9	9	300.1	0.661129	0.722934	1.17238	Control	Eap1
YKL182W	42	42	1270.59	0.674805	0.735805	1.05713	Control	Eap1
YGL078C	2	2	122.56	0.686423	0.746364	1.19526	Eap1	Control
YJL008C	5	5	183.89	0.709838	0.769656	1.4356	Eap1	Control
YBR143C	3	2	46.84	0.724998	0.783891	1.16325	Control	Eap1
YMR186W	32	4	1318.34	0.737224	0.794884	1.10721	Eap1	Control
YHR064C	4	4	180.3	0.752307	0.808887	2.02227	Control	Eap1
YPR080W	34	29	1233.46	0.754926	0.809449	1.02319	Eap1	Control
YPR183W	2	2	43.15	0.763699	0.816586	1.36028	Control	Eap1
YJR109C	5	2	113.51	0.778023	0.829605	3.56378	Control	Eap1
YMR108W	3	2	72.07	0.792224	0.84242	1.26511	Eap1	Control
YCL028W	2	2	73.55	0.795429	0.843504	1.18361	Control	Eap1
YGL026C	2	2	68.72	0.798952	0.844919	1.43041	Control	Eap1
YBL030C	1	1	18.02	0.806104	0.850154	1.64979	Control	Eap1
YAL012W	5	3	140.16	0.817777	0.860115	1.02023	Eap1	Control
YMR300C	2	1	27.48	0.824087	0.864396	1.02557	Control	Eap1
YDR190C	3	3	116.89	0.846635	0.885349	1.03987	Eap1	Control
YGR193C	9	9	229.17	0.848651	0.885349	1.01003	Control	Eap1
YEL034W	1	1	15.43	0.859564	0.894318	6.30231	Control	Eap1
YBR283C	2	1	20.34	0.864958	0.89751	1.43322	Control	Eap1
YBR218C	4	2	56.85	0.873938	0.904397	1.22756	Control	Eap1
YBR079C	4	2	150.73	0.878132	0.906307	2.97783	Control	Eap1
YKR057W;YJL136C	4	4	117.39	0.887987	0.914034	1.09176	Control	Eap1
YPL235W	2	2	58.4	0.892843	0.916589	1.11845	Eap1	Control
YML032C	8	8	290.78	0.900149	0.921637	1.73851	Control	Eap1
YML126C	1	1	62.49	0.922918	0.942451	1.41616	Control	Eap1
YGL008C;YPL036W	40	38	1713.28	0.93788	0.955202	1.0762	Control	Eap1
YCR028C-A	8	8	254.71	0.940729	0.955583	1.30567	Control	Eap1
YIL075C	1	1	41.94	0.943903	0.956291	2.3002	Eap1	Control
YJL130C	61	53	1889.47	0.963129	0.973214	1.02536	Eap1	Control
YMR205C	18	16	749.47	0.980031	0.987708	1.09052	Control	Eap1
YBR127C	20	16	647.97	0.987827	0.992972	1.15907	Eap1	Control
YCL009C	1	1	15.13	0.993657	0.995571	1.62138	Eap1	Control
YOR310C	10	10	335.18	0.995571	0.995571	1.72914	Control	Eap1

## Sheet: Dataset3. WT VS caf20∆ proteome
Accession	Peptide.count	Peptides.used.for.quantitation	Confidence.score	Anova..p.	FDR	Max.fold.change	Highest.mean.condition	Lowest.mean.condition
YBR115C	39	30	1255.67	6.08e-11	1.18864e-07	28.3779	WT	caf20∆
YGL251C	9	1	37.21	1.59e-08	1.55422e-05	132.901	caf20∆	WT
YLR303W	15	12	929.53	2.82e-08	1.8377e-05	42.1073	WT	caf20∆
YNR050C	22	19	907.34	2.49e-07	0.000121699	3.16554	WT	caf20∆
YKL140W	1	1	41.47	4.89e-07	0.000134243	Inf	WT	caf20∆
YDR117C	6	3	102.22	5.19e-07	0.000134243	32.7128	WT	caf20∆
YOR276W	4	4	91.93	5.87e-07	0.000134243	27.8738	WT	caf20∆
YMR108W	30	25	1425.77	5.93e-07	0.000134243	1.75532	WT	caf20∆
YIL094C	17	12	609.18	6.18e-07	0.000134243	1.70981	WT	caf20∆
YJL200C	17	12	510.84	9.23e-07	0.000180446	2.43438	WT	caf20∆
YNL212W	10	3	59.28	1.24e-06	0.000220382	35.4567	WT	caf20∆
YNL004W	6	5	93.55	1.84e-06	0.000299767	4.2147	WT	caf20∆
YDR515W	5	1	64.88	3.28e-06	0.000493262	Inf	WT	caf20∆
YGL082W	3	2	55.29	4.59e-06	0.000636027	7.41766	WT	caf20∆
YHR039C-A	8	5	369.45	4.88e-06	0.000636027	1.37579	WT	caf20∆
YOR046C	13	11	539.66	5.55e-06	0.000678141	1.51625	WT	caf20∆
YKR089C	6	1	28.59	6.3e-06	0.000720417	479.885	WT	caf20∆
YER086W	27	22	724.89	6.99e-06	0.000720417	1.63026	WT	caf20∆
YFR033C	1	1	34.06	7.13e-06	0.000720417	4.37863	WT	caf20∆
YDL182W	22	4	1174.95	7.37e-06	0.000720417	2.57591	WT	caf20∆
YJL159W;YJL160C	5	2	176.5	7.82e-06	0.000728005	9.01514	WT	caf20∆
YNL134C	16	14	1036.24	1.18e-05	0.001037	1.89709	caf20∆	WT
YAR035W	4	3	65.04	1.22e-05	0.001037	240.306	WT	caf20∆
YCR035C	3	2	45.13	1.47e-05	0.00119744	53.3855	caf20∆	WT
YIR034C	15	11	562.07	1.55e-05	0.0012121	3.32876	WT	caf20∆
YMR062C	24	18	1097.34	1.62e-05	0.00121812	2.11166	WT	caf20∆
YBR145W	7	3	177.32	1.77e-05	0.00128161	2.5214	WT	caf20∆
YER090W	16	13	772.44	2.08e-05	0.00143591	1.36192	WT	caf20∆
YJL052W	29	14	1429.99	2.13e-05	0.00143591	2.64106	WT	caf20∆
YHR182W	14	7	118.01	2.4e-05	0.001564	2.78155	WT	caf20∆
YBR072W	11	10	734.56	2.56e-05	0.00160066	3.74756	WT	caf20∆
YBR112C	12	9	315.72	2.62e-05	0.00160066	1.42781	caf20∆	WT
YLR089C	15	12	382.39	2.99e-05	0.00177135	2.0771	WT	caf20∆
YIL064W	5	3	49.26	3.42e-05	0.00189526	2.52409	caf20∆	WT
YER069W	35	27	1284.68	3.46e-05	0.00189526	2.55771	WT	caf20∆
YGR083C	10	5	109.52	3.49e-05	0.00189526	2.49083	WT	caf20∆
YOR198C	31	19	1046.37	3.86e-05	0.00203954	1.26	WT	caf20∆
YGL009C	62	49	3152.93	4e-05	0.0020456	1.73999	WT	caf20∆
YJL088W	15	12	576.14	4.11e-05	0.0020456	1.84028	WT	caf20∆
YLR244C	10	9	325.18	4.2e-05	0.0020456	1.20126	WT	caf20∆
YER127W	5	2	31.6	4.29e-05	0.0020456	3.97519	WT	caf20∆
YGL026C	33	27	1766.05	4.44e-05	0.00206671	1.45818	WT	caf20∆
YLR388W	5	2	280.9	5.4e-05	0.00245512	2.30761	WT	caf20∆
YOL140W	9	8	243.36	6e-05	0.00266591	2.89802	WT	caf20∆
YBR080C	15	8	253.8	6.81e-05	0.00295857	1.59044	WT	caf20∆
YLR460C	5	2	108.31	7.13e-05	0.00303025	9.22278	caf20∆	WT
YJL060W	12	11	400.59	8.18e-05	0.00338459	1.54149	WT	caf20∆
YKL110C	3	1	49.07	8.31e-05	0.00338459	15.0956	WT	caf20∆
YJR137C	49	39	1672.92	9.81e-05	0.00391399	1.49139	WT	caf20∆
YBR010W	3	2	81.1	0.000100366	0.00392431	4.15498	caf20∆	WT
YDL117W	4	1	40.89	0.000105204	0.00403282	47.6847	WT	caf20∆
YDL131W	24	5	1371.84	0.000119028	0.00444636	1.78782	WT	caf20∆
YOR230W	17	15	825.87	0.000120838	0.00444636	1.29677	WT	caf20∆
YOL139C	11	7	565.2	0.000122815	0.00444636	1.57959	WT	caf20∆
YAL005C	50	12	3486.48	0.00012543	0.00445847	1.61501	caf20∆	WT
YJL153C	16	11	785.93	0.000129311	0.00451434	4.77999	WT	caf20∆
YDR127W	68	53	2630.57	0.000132043	0.00452884	1.20644	WT	caf20∆
YJL024C	1	1	29.73	0.0001542	0.0051976	4.04407	WT	caf20∆
YOL058W	25	21	1476.73	0.00016718	0.00553961	1.62885	WT	caf20∆
YLR406C	10	1	526.79	0.00018649	0.00604066	3.19016	WT	caf20∆
YFR051C	6	4	63.94	0.000188481	0.00604066	1.86128	WT	caf20∆
YGL256W	3	3	46.11	0.000204034	0.00643365	2.84769	WT	caf20∆
YGL093W	8	1	68.08	0.000209916	0.00651406	3.16215	WT	caf20∆
YBR079C	35	24	1111.37	0.000224595	0.00672914	1.21632	WT	caf20∆
YDL075W	10	1	531.59	0.000226781	0.00672914	2.64934	WT	caf20∆
YKR066C	10	7	281.26	0.000227173	0.00672914	2.01851	WT	caf20∆
YDR019C	12	12	397.51	0.000242871	0.00703648	1.50438	WT	caf20∆
YMR202W	3	3	152.36	0.000244747	0.00703648	2.08788	WT	caf20∆
YBR249C	19	14	741.56	0.000253705	0.00718831	1.40284	WT	caf20∆
YGL150C	13	5	55.32	0.000261745	0.00723738	1.46653	caf20∆	WT
YBR191W	10	1	462.37	0.000262841	0.00723738	1.54715	WT	caf20∆
YLR129W	10	5	166.61	0.000321441	0.00872802	1.92871	WT	caf20∆
YOL097C	14	9	448.17	0.000333868	0.00875618	1.35784	WT	caf20∆
YPL061W	37	32	2272.85	0.000340187	0.00875618	1.54896	caf20∆	WT
YGR254W	41	16	2400.2	0.00034175	0.00875618	1.32913	WT	caf20∆
YLR229C	2	1	61.53	0.000344009	0.00875618	2.07516	WT	caf20∆
YOR074C	6	4	154	0.000346389	0.00875618	1.84148	caf20∆	WT
YEL060C	10	6	299.47	0.000355987	0.00875618	1.89075	WT	caf20∆
YOR317W	27	20	823.98	0.000356189	0.00875618	1.28785	WT	caf20∆
YOR136W	14	11	671.78	0.000358309	0.00875618	1.5532	caf20∆	WT
YLL024C	54	12	3788.76	0.00036957	0.00891987	1.60072	caf20∆	WT
YGR088W	10	9	189.58	0.000397967	0.00940762	4.92632	WT	caf20∆
YDL061C	6	5	308.65	0.000405545	0.00940762	1.85652	WT	caf20∆
YLR371W	14	2	61.97	0.000407482	0.00940762	2.27421	caf20∆	WT
YDL198C	12	7	271.39	0.000409027	0.00940762	2.58578	WT	caf20∆
YLR134W	16	8	616.93	0.000414136	0.00941437	3.49954	WT	caf20∆
YCL017C	7	4	103.28	0.000439141	0.00986805	1.91285	WT	caf20∆
YKL001C	5	2	106.4	0.000453743	0.0100803	1.7424	WT	caf20∆
YPL212C	16	10	223.35	0.000464087	0.0101943	1.5601	WT	caf20∆
YLR300W	12	10	380.35	0.000540016	0.0115204	1.67533	caf20∆	WT
YKR071C	5	4	147.05	0.000543581	0.0115204	1.34435	WT	caf20∆
YKL029C	26	20	943.12	0.00054485	0.0115204	1.33805	WT	caf20∆
YLR351C	12	10	417.37	0.000548029	0.0115204	1.57476	WT	caf20∆
YOR320C	4	2	46.08	0.000589829	0.0120935	2.0679	caf20∆	WT
YOR374W	26	19	1219.35	0.000595461	0.0120935	1.32549	WT	caf20∆
YLR192C	7	6	389.59	0.000598055	0.0120935	1.17688	caf20∆	WT
YGL187C	3	3	90.3	0.000600034	0.0120935	1.61879	WT	caf20∆
YNL112W	17	13	706.61	0.000607837	0.0121257	1.29071	WT	caf20∆
YOR145C	9	2	68.6	0.000614461	0.0121341	1.65465	WT	caf20∆
YDR200C	3	1	42.83	0.000629489	0.0123065	3.63552	WT	caf20∆
YHR111W	4	1	41.97	0.000643418	0.0124543	29.9311	WT	caf20∆
YLR304C	40	30	1603.02	0.000686931	0.0131662	1.72875	caf20∆	WT
YPR145W	32	20	1347.93	0.000709854	0.0134734	1.4428	WT	caf20∆
YER073W	27	19	1034.68	0.000730558	0.0136557	1.73394	WT	caf20∆
YNL154C	4	3	108.85	0.000733424	0.0136557	3.59497	WT	caf20∆
YDL171C	53	39	1797.4	0.00074217	0.0136859	1.20139	WT	caf20∆
YNL308C	12	6	191.77	0.000749048	0.0136859	1.74747	WT	caf20∆
YHR200W	7	7	349.14	0.00075657	0.0136953	1.28944	caf20∆	WT
YJL158C	3	1	141.52	0.000767623	0.0137535	2.63088	WT	caf20∆
YDR454C	11	6	588.61	0.000780602	0.0137535	1.32904	caf20∆	WT
YLR100W	2	1	80.41	0.000780889	0.0137535	2.80531	WT	caf20∆
YPL010W	5	3	134.4	0.000818174	0.0142815	2.25367	caf20∆	WT
YGL125W	14	9	484.64	0.000837953	0.0144973	1.67436	WT	caf20∆
YER120W	8	6	340.99	0.000856753	0.0146332	1.44977	WT	caf20∆
YHL030W	17	7	326.06	0.000860778	0.0146332	3.23814	caf20∆	WT
YHL021C	9	9	275.68	0.000878363	0.0147206	1.82034	WT	caf20∆
YJL130C	114	83	5536.06	0.000880977	0.0147206	1.35213	WT	caf20∆
YLR109W	15	14	913.02	0.000902177	0.0149471	1.76936	caf20∆	WT
YOR283W	6	4	109.52	0.000958843	0.015698	1.55926	WT	caf20∆
YKL210W	40	30	1624.89	0.00096356	0.015698	1.23614	caf20∆	WT
YDR054C	3	2	82.37	0.00097762	0.0157454	2.32223	WT	caf20∆
YJL034W	30	19	1088.09	0.00098258	0.0157454	1.43675	WT	caf20∆
YMR237W	7	3	83.09	0.00099333	0.0157883	2.02929	WT	caf20∆
YCL009C	11	11	465.48	0.00103448	0.0163098	1.39113	WT	caf20∆
YDR519W	8	5	262.31	0.00104532	0.0163488	1.42145	caf20∆	WT
YBL064C	7	5	252.27	0.00106148	0.0164697	1.60379	WT	caf20∆
YKL150W	10	8	256.52	0.00111602	0.0171544	1.64471	WT	caf20∆
YGL055W	9	6	265.69	0.00112316	0.0171544	1.69208	caf20∆	WT
YGL078C	14	11	306.24	0.00114948	0.0174166	1.82431	WT	caf20∆
YGR261C	9	4	80.98	0.00115814	0.0174166	1.59564	WT	caf20∆
YOR020C	7	3	378.22	0.00117313	0.0175074	1.46819	caf20∆	WT
YHL004W	2	1	13.39	0.0012125	0.0179579	40.225	WT	caf20∆
YIL022W	12	7	320.84	0.00124427	0.0182898	2.55678	WT	caf20∆
YNL231C	12	7	268.91	0.00132152	0.0191753	1.60556	WT	caf20∆
YMR092C	15	11	401.91	0.00132413	0.0191753	1.28035	caf20∆	WT
YDL058W	31	9	322.94	0.00137521	0.0197686	2.16825	WT	caf20∆
YDR155C	11	7	766.92	0.00143822	0.0204573	1.48669	caf20∆	WT
YDL064W	3	1	23.57	0.00144405	0.0204573	1.3625	caf20∆	WT
YPL093W	14	6	337.32	0.00146348	0.0205835	1.57631	caf20∆	WT
YGR200C	6	6	160.64	0.00147671	0.0206212	1.3833	caf20∆	WT
YBR093C	7	2	133.74	0.00152012	0.0210768	2.96278	WT	caf20∆
YBR084W	22	14	552.52	0.00155024	0.021343	1.86606	WT	caf20∆
YDR377W	2	2	27.76	0.00156926	0.0214294	3.36803	WT	caf20∆
YCL034W	3	3	69.93	0.00158802	0.0214294	1.55289	WT	caf20∆
YPR041W	17	12	597.84	0.00158939	0.0214294	1.3659	caf20∆	WT
YLR355C	33	28	2073.3	0.00162293	0.0217317	1.35325	WT	caf20∆
YDR152W	4	3	85.85	0.00172409	0.0229292	1.70517	WT	caf20∆
YER156C	13	8	362.17	0.00180787	0.0238261	1.24891	WT	caf20∆
YKL213C	8	4	101.02	0.0018159	0.0238261	3.60126	WT	caf20∆
YHR029C	9	6	446.67	0.00183503	0.0239165	1.56213	WT	caf20∆
YCR060W	1	1	14.31	0.00187359	0.0241974	33.3437	caf20∆	WT
YNL135C	9	7	482.23	0.00188134	0.0241974	1.25911	caf20∆	WT
YPL079W	10	1	416.46	0.001895	0.0242138	2.76284	WT	caf20∆
YPL106C	47	28	2424.39	0.00195369	0.0246017	1.22984	caf20∆	WT
YGR167W	11	8	397.97	0.00196296	0.0246017	1.49186	caf20∆	WT
YOL154W	4	3	99.73	0.0019631	0.0246017	3.83361	WT	caf20∆
YJL001W	11	7	398.92	0.00199622	0.0247083	1.29515	WT	caf20∆
YDR453C	4	1	71.83	0.00200899	0.0247083	2.373	caf20∆	WT
YDR172W	18	13	485.28	0.00200952	0.0247083	1.3065	WT	caf20∆
YDR233C	9	7	333.89	0.0020547	0.0250495	1.68108	WT	caf20∆
YOR153W	16	9	477.72	0.00206998	0.0250495	1.75926	WT	caf20∆
YLR043C	11	6	533.47	0.00207571	0.0250495	1.43743	caf20∆	WT
YMR128W	14	6	178.33	0.00211575	0.0252449	1.69931	caf20∆	WT
YMR095C	5	4	101.11	0.00211773	0.0252449	6.00193	WT	caf20∆
YER003C	14	12	593.25	0.00215401	0.0255217	1.40045	caf20∆	WT
YER052C	16	12	638.91	0.00221261	0.0260581	1.32567	WT	caf20∆
YLR420W	12	9	197.45	0.00228093	0.0267019	1.50169	WT	caf20∆
YPL190C	7	6	159.37	0.00232791	0.0269355	1.97899	caf20∆	WT
YBL047C	29	21	1064.48	0.00232844	0.0269355	1.4355	caf20∆	WT
YDL130W	2	2	171.16	0.00245504	0.0282037	1.56086	caf20∆	WT
YNL104C	39	19	1726.5	0.00247074	0.0282037	1.37446	WT	caf20∆
YLR200W	6	3	342.11	0.00248135	0.0282037	1.48301	caf20∆	WT
YER175C	9	4	241.76	0.00254429	0.028752	1.60768	WT	caf20∆
YGL242C	6	4	141.37	0.00260608	0.029281	1.4787	caf20∆	WT
YDL066W;YLR174W	33	21	1663.38	0.00273816	0.0305892	1.32692	WT	caf20∆
YMR096W	15	6	651.09	0.00277865	0.0308651	1.83006	WT	caf20∆
YOR171C	2	1	60.82	0.00280922	0.0310284	13.7471	WT	caf20∆
YLR384C	17	11	389.75	0.00291117	0.0319738	1.48163	WT	caf20∆
YDR258C	28	21	755.91	0.00296621	0.0321159	1.46309	WT	caf20∆
YER048W-A	5	2	59.99	0.00298524	0.0321159	1.55821	WT	caf20∆
YLR259C	30	22	2048.83	0.00298887	0.0321159	1.42591	caf20∆	WT
YGR158C	3	3	73.47	0.00298982	0.0321159	1.77769	WT	caf20∆
YJL076W	10	4	212.89	0.00300789	0.0321335	2.07502	WT	caf20∆
YML105C	3	2	70.29	0.00302842	0.0321769	3.55951	caf20∆	WT
YKL117W	5	5	288.17	0.00311182	0.0328844	1.28364	caf20∆	WT
YHR068W	19	16	822.57	0.00317179	0.0333379	1.36374	caf20∆	WT
YJR148W	19	13	869.26	0.00319879	0.0334419	1.4576	WT	caf20∆
YLR401C	10	6	289.6	0.00328422	0.0340434	1.73511	WT	caf20∆
YEL021W	30	26	1843.79	0.00329115	0.0340434	1.75955	caf20∆	WT
YHR208W	23	17	1526.6	0.00331564	0.0341162	1.39112	WT	caf20∆
YBR222C	8	3	171.11	0.00335558	0.0343463	1.60248	WT	caf20∆
YKL196C	9	6	425.7	0.00339036	0.0345217	1.37072	caf20∆	WT
YJR144W	7	6	177.28	0.00345753	0.0348461	2.60009	WT	caf20∆
YKL040C	7	7	305.48	0.00345788	0.0348461	1.45491	WT	caf20∆
YJL050W	10	4	225.1	0.00353984	0.0354892	1.67424	WT	caf20∆
YBR058C	5	3	107.33	0.00358123	0.0357209	3.99877	caf20∆	WT
YNR001C	12	10	667.4	0.0036065	0.0357904	1.42173	WT	caf20∆
YOL151W	14	11	471.25	0.00364851	0.0360245	1.26791	caf20∆	WT
YGL224C	3	2	35.55	0.00391818	0.0384926	2.36409	WT	caf20∆
YKL218C	5	4	106.24	0.00403438	0.0392491	2.1902	WT	caf20∆
YPR110C	9	8	340.71	0.00403534	0.0392491	1.38171	WT	caf20∆
YMR246W	19	12	415.49	0.00407986	0.0394368	1.3475	WT	caf20∆
YBR247C	8	6	254.66	0.00409497	0.0394368	1.62786	WT	caf20∆
YKR046C	5	1	148.63	0.00411608	0.0394458	1.55514	WT	caf20∆
YFR030W	26	20	826.64	0.00414712	0.0395493	1.49786	WT	caf20∆
YIL126W	16	4	121.51	0.00422512	0.0400976	1.87545	caf20∆	WT
YGL037C	6	5	178.37	0.00426977	0.0403256	1.18139	caf20∆	WT
YNR067C	4	3	98.99	0.00434788	0.0408659	2.47801	caf20∆	WT
YLR359W	27	19	1018.7	0.00459491	0.0428934	1.41168	caf20∆	WT
YDR129C	26	19	1020.98	0.00460747	0.0428934	1.43167	caf20∆	WT
YHR138C	2	1	40.24	0.00464189	0.0430089	4.56906	caf20∆	WT
YIL043C	11	9	264.25	0.0046689	0.0430552	1.79636	WT	caf20∆
YMR130W	6	4	61.68	0.00469777	0.0431181	1.75323	WT	caf20∆
YDL160C	10	9	320.3	0.00478431	0.0437071	1.32406	WT	caf20∆
YNL061W	12	9	446.48	0.00486592	0.0442459	1.54614	WT	caf20∆
YEL022W	11	4	132.66	0.0050337	0.0455597	1.86824	caf20∆	WT
YLR410W	22	14	469.83	0.00526324	0.0471023	1.63932	caf20∆	WT
YOR065W	2	2	74.06	0.0052724	0.0471023	5.22889	caf20∆	WT
YNL055C	16	12	793.81	0.00529015	0.0471023	1.71371	WT	caf20∆
YBR200W	3	1	51.49	0.00531976	0.0471023	Inf	WT	caf20∆
YLR431C	6	1	35	0.0053246	0.0471023	Inf	WT	caf20∆
YPR191W	17	9	625.94	0.00539375	0.0474991	1.33399	WT	caf20∆
YDL137W	14	2	753.15	0.00543837	0.0476772	2.1837	caf20∆	WT
YKL096W	5	4	330.65	0.00566577	0.049449	1.60878	WT	caf20∆
YPL019C	8	3	44.92	0.00571127	0.0495654	2.17487	WT	caf20∆
YDR091C	19	15	647.34	0.00572981	0.0495654	1.16213	WT	caf20∆
YLR153C	29	24	1293.21	0.00581176	0.0497704	1.3284	WT	caf20∆
YJR142W	2	1	46.84	0.00583081	0.0497704	15.5939	caf20∆	WT
YGL099W	15	8	204.01	0.00587159	0.0497704	2.36289	caf20∆	WT
YKL024C	14	7	419.02	0.00589359	0.0497704	1.45187	caf20∆	WT
YMR215W	8	6	284.56	0.00590215	0.0497704	1.92605	WT	caf20∆
YMR318C	17	16	835.67	0.00590626	0.0497704	1.36641	caf20∆	WT
YCR051W	5	4	232.1	0.00600224	0.0503622	1.53596	caf20∆	WT
YDR051C	3	3	93.27	0.00606382	0.0505163	1.52971	WT	caf20∆
YLR196W	9	6	372.71	0.00609706	0.0505163	1.55261	caf20∆	WT
YGL012W	5	3	73.88	0.00609813	0.0505163	3.89243	caf20∆	WT
YCL057W	16	10	489.87	0.0061797	0.050976	1.48944	caf20∆	WT
YHR018C	19	14	888.07	0.00622292	0.0511169	1.45669	WT	caf20∆
YFR044C	15	10	605.81	0.00632544	0.0517416	1.24205	caf20∆	WT
YOR158W	2	1	29.81	0.00649299	0.0528908	2.26614	WT	caf20∆
YLR022C	5	2	59.53	0.00654397	0.0530849	1.90288	WT	caf20∆
YHR037W	10	9	188.89	0.00659351	0.0532657	1.28999	WT	caf20∆
YJL217W	9	6	320.52	0.00663382	0.0533709	1.6519	WT	caf20∆
YBR273C	6	2	50.74	0.00673124	0.0539327	2.67675	WT	caf20∆
YGL173C	33	23	706.65	0.00679483	0.05422	1.1997	caf20∆	WT
YDR353W;YHR106W	18	15	1156.05	0.00683816	0.0543439	1.33861	caf20∆	WT
YPR069C	18	17	856.1	0.00690218	0.0544081	1.40881	caf20∆	WT
YHR137C-A	2	2	26.59	0.00690756	0.0544081	1.44333	WT	caf20∆
YIL116W	13	9	470.89	0.00692973	0.0544081	1.32887	WT	caf20∆
YER148W	4	1	46.08	0.00703282	0.0549967	14.7987	WT	caf20∆
YCR030C	4	4	154.35	0.00709098	0.0552054	1.52807	WT	caf20∆
YJR016C	42	36	2242.49	0.00711599	0.0552054	1.35897	WT	caf20∆
YDR086C	1	1	31.43	0.00715181	0.055264	Inf	caf20∆	WT
YNL015W	4	3	191.81	0.00727766	0.0559637	1.38579	WT	caf20∆
YML048W	10	8	352.07	0.00729962	0.0559637	1.93501	WT	caf20∆
YKL094W	4	2	72.8	0.00733987	0.0560525	1.94638	WT	caf20∆
YDL192W	13	2	714.79	0.00747676	0.0568758	1.7751	caf20∆	WT
YDL229W	41	2	2866.13	0.00758895	0.0575054	1.28716	caf20∆	WT
YPR060C	8	6	183.23	0.00784671	0.059229	1.41233	WT	caf20∆
YER055C	16	15	770.98	0.00793867	0.0596927	1.1852	WT	caf20∆
YLR066W	2	2	44.29	0.00802642	0.0601213	3.16904	caf20∆	WT
YBL091C	8	4	190.16	0.00807797	0.0602764	1.46952	WT	caf20∆
YGL106W	7	5	303.67	0.00812605	0.0604047	1.18926	caf20∆	WT
YHR179W	22	18	1119.45	0.00816774	0.0604845	1.16586	caf20∆	WT
YDL126C	46	40	2088.88	0.00831834	0.0612917	1.39047	caf20∆	WT
YDR035W	16	11	652.18	0.00833943	0.0612917	1.23285	WT	caf20∆
YPL134C	1	1	16.17	0.00848142	0.0618664	5.50682	caf20∆	WT
YNL209W	40	1	2959.32	0.00850209	0.0618664	1.28325	caf20∆	WT
YGR178C	3	3	37.57	0.00853012	0.0618664	1.53698	WT	caf20∆
YER103W	28	11	1321.4	0.00856175	0.0618664	1.4066	WT	caf20∆
YBR199W	3	1	26.76	0.00857586	0.0618664	191.601	WT	caf20∆
YPL231W	107	84	5678.91	0.00869373	0.0624123	1.2489	caf20∆	WT
YBL068W	10	3	238.74	0.00871537	0.0624123	1.80375	WT	caf20∆
YBR009C	5	5	263.59	0.00878844	0.0627058	1.38485	WT	caf20∆
YDL078C	7	3	209.85	0.00885873	0.0629775	2.83405	WT	caf20∆
YGR286C	6	2	84.71	0.0090613	0.0641842	2.56746	WT	caf20∆
YDR057W	5	1	47.39	0.00922439	0.0648949	7.43978	WT	caf20∆
YOR021C	12	10	324.96	0.00925262	0.0648949	1.28048	caf20∆	WT
YHR143W-A	2	1	119.51	0.00926122	0.0648949	1.34955	caf20∆	WT
YPR183W	10	8	213.56	0.00939801	0.0656183	1.33682	WT	caf20∆
YLR009W	3	2	17.07	0.00955865	0.0664688	15.2893	WT	caf20∆
YLR432W	24	7	1557.45	0.00961331	0.0664688	1.24058	caf20∆	WT
YPL009C	11	5	146.23	0.00962449	0.0664688	1.25719	WT	caf20∆
YOR142W	9	6	336.18	0.00965582	0.0664688	1.22918	WT	caf20∆
YMR206W	2	1	19.12	0.00993209	0.0681306	2.07407	WT	caf20∆
YHR192W	1	1	25.2	0.0101152	0.0689606	84.9967	WT	caf20∆
YPR040W	4	3	31.69	0.0101236	0.0689606	1.68592	WT	caf20∆
YAR015W	21	12	947.1	0.0102701	0.0697156	1.32824	caf20∆	WT
YDR432W	9	5	372.69	0.0103341	0.0697171	1.58683	caf20∆	WT
YKL121W	4	2	24.56	0.0103417	0.0697171	1.691	WT	caf20∆
YAL044W-A	3	2	31.34	0.0106716	0.0714478	2.34383	WT	caf20∆
YCR012W	39	32	3130.49	0.0106931	0.0714478	1.29532	caf20∆	WT
YLR017W	7	5	150.71	0.010722	0.0714478	1.38565	WT	caf20∆
YPR112C	7	3	115.78	0.0107484	0.0714478	3.74627	WT	caf20∆
YJR042W	5	1	60.55	0.0107811	0.0714478	7.70522	WT	caf20∆
YBR088C	11	9	477.99	0.0109613	0.0723964	1.47443	caf20∆	WT
YMR203W	3	3	95.53	0.0111593	0.0734559	1.46685	caf20∆	WT
YBR256C	9	9	344.77	0.0112821	0.0740148	1.80535	WT	caf20∆
YCL011C	8	6	154.94	0.0117248	0.0766623	1.23098	WT	caf20∆
YNR007C	3	1	56.01	0.0118523	0.077109	1.5517	WT	caf20∆
YKL046C	1	1	15.37	0.011872	0.077109	15.3672	caf20∆	WT
YKL157W	31	25	1394.4	0.0119663	0.077464	1.24496	caf20∆	WT
YMR173W	9	8	292.07	0.0121085	0.0781255	1.34939	caf20∆	WT
YOL143C	9	8	255.45	0.0122909	0.0790417	1.58552	WT	caf20∆
YOR095C	7	5	266.21	0.0123442	0.079124	1.58571	caf20∆	WT
YOL057W	13	8	237.61	0.0124485	0.0794997	1.19259	caf20∆	WT
YKL204W	5	3	99.75	0.0124841	0.0794997	1.69888	WT	caf20∆
YLR295C	4	3	94.54	0.0125764	0.0796961	1.63807	WT	caf20∆
YHL034C	10	7	330.83	0.0125965	0.0796961	1.51153	caf20∆	WT
YNL182C	4	4	31.92	0.012933	0.0815611	1.83853	WT	caf20∆
YHR046C	3	2	40.34	0.013215	0.0830082	2.00814	WT	caf20∆
YIL074C	17	7	729.63	0.0132473	0.0830082	1.29104	WT	caf20∆
YHR099W	22	5	167.91	0.0133431	0.0833411	2.87086	caf20∆	WT
YHR174W	50	27	3951.49	0.0135932	0.084505	1.29828	caf20∆	WT
YKL129C	22	4	287.05	0.0136218	0.084505	1.61973	WT	caf20∆
YER094C	5	2	303.05	0.0136591	0.084505	1.34827	caf20∆	WT
YGR280C	3	3	44.03	0.0137393	0.0847328	4.6185	caf20∆	WT
YDR099W	18	3	1123.16	0.0139935	0.0856398	1.13051	WT	caf20∆
YIL036W	5	2	44.81	0.0140082	0.0856398	10.694	WT	caf20∆
YNL010W	11	9	415.31	0.0140178	0.0856398	1.14233	caf20∆	WT
YJL055W	8	7	207.75	0.014096	0.0858494	1.3935	WT	caf20∆
YER043C	31	27	1700.62	0.0141763	0.0860705	1.15776	caf20∆	WT
YJL080C	54	44	2113.36	0.0143593	0.0866832	1.2013	WT	caf20∆
YER004W	5	3	63.57	0.0143659	0.0866832	1.50871	WT	caf20∆
YPR160W	15	12	422.12	0.0148078	0.0888498	1.78914	WT	caf20∆
YPL101W	2	1	44.96	0.014825	0.0888498	2.29851	WT	caf20∆
YOL076W	12	2	65.03	0.0149399	0.0888498	3.02489	WT	caf20∆
YBR149W	16	13	613.39	0.0149451	0.0888498	1.2241	WT	caf20∆
YLL050C	11	11	651.29	0.0149523	0.0888498	1.31603	caf20∆	WT
YJR104C	12	9	605.26	0.0150571	0.0888498	1.23103	caf20∆	WT
YLR301W	12	9	541.36	0.0150672	0.0888498	1.33731	caf20∆	WT
YNL084C	5	3	140.93	0.0151464	0.0888498	1.43543	caf20∆	WT
YML070W	20	17	845.31	0.0151729	0.0888498	1.17538	caf20∆	WT
YPR063C	1	1	19.22	0.0152178	0.0888498	4.66694	WT	caf20∆
YHL039W	8	4	130.58	0.0152249	0.0888498	1.28977	caf20∆	WT
YER012W	6	4	235.91	0.0153541	0.0892411	1.30214	caf20∆	WT
YGR267C	9	8	321.22	0.0153832	0.0892411	1.32166	WT	caf20∆
YPL012W	12	9	290.47	0.0154982	0.0896098	1.28119	WT	caf20∆
YBR092C	10	2	184.41	0.0155385	0.0896098	1.64369	caf20∆	WT
YFR006W	10	6	124.46	0.0157435	0.0903926	1.30747	caf20∆	WT
YNL220W	22	20	1040.13	0.0157667	0.0903926	1.15747	WT	caf20∆
YIL145C	4	3	69.8	0.0159495	0.0907305	2.04466	caf20∆	WT
YFL017C	3	2	47.27	0.0159601	0.0907305	1.53175	WT	caf20∆
YML123C	5	2	85.28	0.0159648	0.0907305	2.48904	caf20∆	WT
YMR194W	9	1	412.78	0.0161623	0.0915787	1.64494	WT	caf20∆
YIR008C	6	2	55.14	0.0162421	0.0915787	3.43885	WT	caf20∆
YNL132W	17	13	394.41	0.0162735	0.0915787	1.3453	WT	caf20∆
YBR283C	5	4	56.78	0.0163015	0.0915787	5.65598	caf20∆	WT
YKL060C	31	28	2081.44	0.016755	0.0936507	1.18308	caf20∆	WT
YIL105C	6	2	59.65	0.0167661	0.0936507	2.54865	WT	caf20∆
YER133W	8	7	316.38	0.0169082	0.0941753	1.21102	WT	caf20∆
YGL206C	53	44	2237.19	0.017113	0.0949732	1.25286	caf20∆	WT
YHR013C	5	5	119.79	0.0171486	0.0949732	1.25605	caf20∆	WT
YOR108W	24	6	1010.84	0.0172003	0.0949905	1.49339	WT	caf20∆
YIL142W	23	13	923.25	0.017284	0.0951835	1.24294	WT	caf20∆
YER009W	3	2	208.33	0.0173477	0.0952077	2.48543	caf20∆	WT
YFL018C	23	19	890.38	0.0173857	0.0952077	1.23076	WT	caf20∆
YEL032W	9	4	112.32	0.0174536	0.0952704	1.23417	caf20∆	WT
YKR044W	3	1	30.16	0.0174947	0.0952704	1.33157	WT	caf20∆
YCL064C	15	9	431.98	0.0176956	0.096097	1.72645	WT	caf20∆
YPL271W	2	2	92.13	0.0178064	0.096431	1.59005	WT	caf20∆
YLR056W	4	2	36.96	0.0179168	0.0967604	2.67702	WT	caf20∆
YNL168C	5	1	80.8	0.0181235	0.0973187	1.46499	caf20∆	WT
YDL055C	19	16	1304.76	0.0181453	0.0973187	1.44237	caf20∆	WT
YMR039C	4	2	139.23	0.0181695	0.0973187	1.73047	WT	caf20∆
YBL002W	8	5	293.57	0.0184547	0.0985765	1.44746	WT	caf20∆
YBL076C	56	42	2140.42	0.0185854	0.0990041	1.14618	caf20∆	WT
YGR162W	23	16	620.27	0.0189051	0.100433	1.26656	WT	caf20∆
YHR183W	32	20	1652.72	0.0191527	0.101473	1.18513	caf20∆	WT
YBR039W	7	7	275.18	0.0195051	0.103061	1.71041	WT	caf20∆
YDR023W	34	28	1627.88	0.0196916	0.10372	1.18793	caf20∆	WT
YDR063W	1	1	45.76	0.0197747	0.10372	1.22802	caf20∆	WT
YML016C	5	3	29.61	0.019789	0.10372	2.67809	WT	caf20∆
YDR472W	1	1	47.29	0.0199262	0.10416	18.0949	WT	caf20∆
YNL129W	3	1	79.48	0.0201063	0.104626	2.66297	WT	caf20∆
YJR072C	6	4	124.26	0.0201224	0.104626	1.19099	WT	caf20∆
YFL010C	5	3	98.31	0.0206865	0.107274	1.39139	WT	caf20∆
YNL247W	33	21	909.48	0.02102	0.108434	1.15972	caf20∆	WT
YNL189W	12	10	315.33	0.0210941	0.108434	1.29449	caf20∆	WT
YER002W	4	2	60.78	0.0211026	0.108434	1.64726	WT	caf20∆
YMR183C	5	3	145.43	0.0211625	0.108434	1.69474	caf20∆	WT
YNL037C	13	12	576.07	0.0211876	0.108434	1.5067	caf20∆	WT
YKR078W	7	2	55.51	0.0219366	0.111974	2.73859	WT	caf20∆
YJL172W	11	10	292.54	0.0220808	0.112366	1.64917	WT	caf20∆
YCL035C	6	6	347.22	0.022148	0.112366	1.15129	caf20∆	WT
YBR196C	32	27	1673.68	0.0222295	0.112366	1.24695	caf20∆	WT
R0020C	4	2	73.98	0.0222432	0.112366	2.431	caf20∆	WT
YDR382W	9	9	713.43	0.022445	0.113016	1.3474	caf20∆	WT
YOL064C	10	8	388.8	0.0224877	0.113016	1.26382	WT	caf20∆
YPR113W	6	3	77.06	0.0227553	0.114068	2.10143	WT	caf20∆
YKL126W;YMR104C	6	4	134.37	0.022821	0.114105	1.41911	WT	caf20∆
YNR034W	2	2	77.03	0.0233097	0.115693	1.41902	caf20∆	WT
YPR068C	4	2	34.89	0.0233726	0.115693	1.24032	WT	caf20∆
YGL070C	3	2	79	0.0234082	0.115693	1.52827	caf20∆	WT
YJL208C	1	1	15.85	0.0234146	0.115693	42.1188	WT	caf20∆
YLL021W	17	9	276.02	0.0234345	0.115693	1.34777	caf20∆	WT
YMR120C	36	21	2110.29	0.0236094	0.116026	1.3189	caf20∆	WT
YKL068W	2	1	16.14	0.0236206	0.116026	4.1423	WT	caf20∆
YML001W	7	4	328.18	0.0238443	0.116831	1.37138	caf20∆	WT
YDR292C	4	2	84.05	0.0243191	0.118859	3.77855	WT	caf20∆
YJR075W	3	1	55.76	0.0244048	0.118981	5.04275	WT	caf20∆
YMR241W	8	5	389.3	0.024571	0.119461	1.49766	WT	caf20∆
YFL048C	5	2	150.56	0.0246255	0.119461	1.53174	WT	caf20∆
YPL081W	15	1	774.91	0.0248406	0.120206	1.40139	WT	caf20∆
YDL116W	3	1	39.45	0.0249678	0.120458	4.17499	caf20∆	WT
YNL121C	21	13	630.59	0.0250159	0.120458	1.48807	WT	caf20∆
YJR070C	21	16	832.06	0.0251443	0.120779	1.26898	caf20∆	WT
YDR354W	3	3	56.14	0.0253194	0.121322	1.67137	WT	caf20∆
YPR172W	3	2	28.65	0.0256327	0.121969	1.25576	WT	caf20∆
YJR105W	18	14	1095.29	0.0256661	0.121969	1.26813	caf20∆	WT
YKR006C	2	2	52.4	0.0256822	0.121969	2.54276	WT	caf20∆
YKR082W	7	3	89.32	0.025704	0.121969	1.80278	caf20∆	WT
YNL313C	8	6	200.37	0.0262074	0.123954	1.3383	WT	caf20∆
YJR045C	37	18	1830.01	0.0262491	0.123954	1.25223	caf20∆	WT
YIR012W	3	1	55.63	0.0264919	0.124799	1.56905	WT	caf20∆
YNL052W	3	2	66.83	0.0268071	0.125912	1.73414	WT	caf20∆
YPL094C	3	2	30.41	0.0268569	0.125912	1.49412	caf20∆	WT
YKL216W	8	5	337.87	0.0269596	0.126074	1.84491	WT	caf20∆
YLR250W	4	4	123.42	0.0270388	0.126074	1.67958	WT	caf20∆
YMR222C	1	1	29.74	0.0271259	0.126074	1.90418	WT	caf20∆
YDR300C	5	5	176.35	0.0271495	0.126074	1.38676	WT	caf20∆
YBL030C	16	10	712.49	0.027218	0.126093	1.69924	WT	caf20∆
YGR081C	3	2	31.57	0.0273545	0.126426	1.38894	caf20∆	WT
YGL156W	6	4	74.02	0.0274898	0.126628	2.13151	WT	caf20∆
YLR344W	13	2	572.12	0.0275279	0.126628	1.19672	WT	caf20∆
YFL044C	2	1	25.77	0.0278249	0.127694	1.90514	WT	caf20∆
YJR049C	4	2	47.81	0.0285508	0.130718	3.27571	WT	caf20∆
YML004C	9	5	193.94	0.0291366	0.132794	1.36407	WT	caf20∆
YOR184W	20	19	1212.9	0.0291399	0.132794	1.26226	WT	caf20∆
YIR001C	6	4	67.42	0.0292964	0.133196	1.56833	WT	caf20∆
YDR448W	1	1	15.47	0.0294105	0.133405	1.64907	WT	caf20∆
YJL068C	6	5	224.74	0.0295726	0.13359	1.41813	caf20∆	WT
YDR392W	5	2	77.45	0.0296111	0.13359	5.45829	WT	caf20∆
YML074C	4	3	148.53	0.0296563	0.13359	1.30441	caf20∆	WT
YER081W	18	6	820.12	0.0300567	0.135082	1.32883	WT	caf20∆
YER125W	15	13	405.73	0.030361	0.136137	1.2202	WT	caf20∆
YDR298C	10	8	332.98	0.0305493	0.136668	1.48816	WT	caf20∆
YBR089C-A	3	1	75.17	0.03082	0.137564	1.40554	caf20∆	WT
YPR004C	13	9	307.17	0.0312099	0.138935	1.46169	WT	caf20∆
YKL211C	15	11	321.77	0.0312692	0.138935	1.2512	WT	caf20∆
YCL045C	9	2	183.31	0.0318216	0.140737	2.68699	caf20∆	WT
YLR258W	6	5	186.3	0.0318562	0.140737	1.88856	WT	caf20∆
YBR011C;YPL112C	24	19	1269.67	0.0318907	0.140737	1.27051	caf20∆	WT
YAL036C	10	5	145.71	0.0319637	0.140741	1.31698	WT	caf20∆
YGR061C	58	50	2725.29	0.0322843	0.141833	1.22426	caf20∆	WT
YGR271W	9	2	61.4	0.0328987	0.144097	1.47553	WT	caf20∆
YGR080W	8	7	240.29	0.032947	0.144097	1.2744	WT	caf20∆
YJR025C	10	7	287.37	0.0331342	0.144592	1.2826	WT	caf20∆
YGR148C	10	3	486.41	0.0332645	0.144838	1.64942	WT	caf20∆
YJL124C	4	3	32.44	0.0335639	0.145817	2.28235	caf20∆	WT
YOR206W	10	7	172.21	0.0341438	0.147967	1.39786	WT	caf20∆
YAR042W	14	6	112.86	0.0342102	0.147967	1.55912	caf20∆	WT
YGL190C	6	3	62.12	0.0343924	0.148426	1.7491	WT	caf20∆
YKL100C	4	2	96.69	0.0346824	0.149348	2.67429	caf20∆	WT
YEL046C	15	12	672.81	0.0351426	0.150776	1.20366	WT	caf20∆
YDL226C	16	11	370.63	0.0351682	0.150776	1.30782	WT	caf20∆
YGL011C	16	13	592.49	0.0352896	0.150966	1.11438	caf20∆	WT
YCL040W	20	13	698.88	0.0354013	0.151088	1.21924	caf20∆	WT
YDR045C	1	1	35.97	0.0354728	0.151088	1.22546	caf20∆	WT
YLL009C	1	1	51.4	0.0356351	0.151449	1.38722	caf20∆	WT
YJL010C	7	4	130.85	0.0361037	0.153108	1.40638	WT	caf20∆
YHR164C	14	2	64.86	0.0362109	0.15323	5.30073	caf20∆	WT
YCR084C	22	16	852.73	0.0367405	0.155021	1.15164	caf20∆	WT
YHR024C	6	3	100.79	0.0367927	0.155021	1.24963	caf20∆	WT
YLL008W	12	5	198.04	0.0369897	0.155516	1.84661	WT	caf20∆
YPL206C	2	1	29.04	0.0372928	0.155859	2.22521	WT	caf20∆
YNL118C	10	4	109.71	0.0373354	0.155859	1.65732	WT	caf20∆
YOR120W	5	2	204.01	0.0373758	0.155859	2.16566	WT	caf20∆
YJR121W	24	23	1438.21	0.0373903	0.155859	1.37125	WT	caf20∆
YPR028W	3	2	38.64	0.0375152	0.156047	1.71379	WT	caf20∆
YJR080C	6	4	82.74	0.0378451	0.157085	1.54738	WT	caf20∆
YOL059W	13	10	542.76	0.0379448	0.157165	1.29909	WT	caf20∆
YML092C	8	7	379.55	0.0384188	0.158792	1.23898	WT	caf20∆
YPL004C	15	9	1006.39	0.0386134	0.15926	1.06981	WT	caf20∆
YPR118W	9	7	268.85	0.0388563	0.159924	1.2308	caf20∆	WT
YAL023C	10	7	342.29	0.0392302	0.160932	2.08176	WT	caf20∆
YBR111C	6	6	183.62	0.0392659	0.160932	1.22449	caf20∆	WT
YJL054W	1	1	17.36	0.0404407	0.165022	Inf	WT	caf20∆
YML127W	6	4	49.05	0.0405146	0.165022	1.44045	WT	caf20∆
YML017W	8	5	133.7	0.040517	0.165022	1.4764	WT	caf20∆
YDR165W	8	7	194.85	0.0408054	0.165852	1.29498	WT	caf20∆
YLL041C	1	1	43.6	0.0409266	0.165999	Inf	caf20∆	WT
YKR026C	3	2	78.66	0.0411343	0.166496	1.74617	WT	caf20∆
YOR197W	6	6	208.37	0.041648	0.168227	1.31451	caf20∆	WT
YKL182W	105	93	5258.32	0.0425711	0.171064	1.19359	caf20∆	WT
YIL125W	17	14	409.78	0.0425893	0.171064	1.14949	WT	caf20∆
YOR167C	4	3	241.84	0.042673	0.171064	1.24183	caf20∆	WT
YGR119C	2	1	46.17	0.0427003	0.171064	10.7221	WT	caf20∆
YNR051C	6	3	31.35	0.0430193	0.171989	1.85466	WT	caf20∆
YGL123W	19	13	891.28	0.0433186	0.172833	1.20223	caf20∆	WT
YFR053C	22	17	1107.57	0.0439099	0.174835	1.35753	WT	caf20∆
YMR009W	2	2	105.28	0.0444968	0.176812	1.57804	caf20∆	WT
YMR105C	9	7	297.05	0.0448032	0.177668	1.45469	WT	caf20∆
YMR093W	4	4	56.51	0.0449834	0.177712	2.11566	WT	caf20∆
YDR002W	11	5	256.62	0.0449962	0.177712	1.25622	caf20∆	WT
YHR108W	6	4	204.83	0.0453211	0.178465	1.66088	WT	caf20∆
YGL043W	10	7	305.28	0.0454578	0.178465	1.34437	WT	caf20∆
YPL145C	12	10	397.35	0.0454607	0.178465	1.26106	WT	caf20∆
YOL039W	7	6	482.43	0.0456221	0.17874	1.36039	caf20∆	WT
YOR173W	3	1	117.15	0.0458481	0.179266	2.02813	WT	caf20∆
YER017C	3	1	36.6	0.046221	0.180363	2.08694	WT	caf20∆
YOR204W	26	20	1420.27	0.0463953	0.180683	1.20092	WT	caf20∆
YNL244C	9	7	287.28	0.0467502	0.181703	1.17368	caf20∆	WT
YNR043W	7	7	409.13	0.0473619	0.183715	1.25836	caf20∆	WT
YFL007W	22	9	213.57	0.0476818	0.18459	1.35752	WT	caf20∆
YLR180W	22	9	1200.74	0.0481683	0.186105	1.22567	caf20∆	WT
YGR123C	9	5	189.11	0.0485337	0.186591	1.25205	WT	caf20∆
YBR046C	8	6	222.56	0.0485631	0.186591	1.41906	WT	caf20∆
YDR158W	23	23	1175.44	0.0485805	0.186591	1.15907	WT	caf20∆
YOR123C	4	3	129.94	0.0487892	0.187025	2.76005	caf20∆	WT
YMR216C	4	3	94	0.0491808	0.188157	1.66114	WT	caf20∆
YOR109W	9	5	249.25	0.0494541	0.188766	1.2966	caf20∆	WT
YPL226W	36	31	1048.86	0.0495785	0.188766	1.08987	caf20∆	WT
YBL004W	10	2	130.78	0.0496296	0.188766	2.44936	WT	caf20∆
YKL145W	14	9	388.26	0.0497786	0.188965	1.12346	WT	caf20∆
YGL157W	15	10	388.4	0.050186	0.190142	1.24685	caf20∆	WT
YDR381C-A	2	2	31.57	0.050383	0.19052	2.54998	caf20∆	WT
YOR014W	1	1	21.15	0.0505742	0.190874	2.52793	WT	caf20∆
YDR304C	7	6	171.52	0.0508749	0.191639	1.32292	caf20∆	WT
YJL082W	6	3	80.31	0.0512429	0.192618	1.36222	caf20∆	WT
YER006W	11	8	433.85	0.0513318	0.192618	1.20971	WT	caf20∆
YNL166C	7	5	194.26	0.0514444	0.19267	1.23647	caf20∆	WT
YHR163W	9	8	353.88	0.0516327	0.193006	1.26825	caf20∆	WT
YML072C	21	14	692.21	0.051808	0.193291	1.62519	WT	caf20∆
YOL031C	5	1	31.73	0.0519918	0.193607	9.58831	WT	caf20∆
YMR285C	3	1	29.4	0.0527666	0.196023	2.08224	WT	caf20∆
YBR022W	2	1	21.79	0.0528411	0.196023	2.18035	caf20∆	WT
YER155C	15	5	156.07	0.0534687	0.197976	1.62969	WT	caf20∆
YML093W	7	3	42.04	0.0537878	0.198781	2.14668	caf20∆	WT
YOR175C	5	2	71.29	0.0538929	0.198793	2.03634	WT	caf20∆
YER068W	3	2	19.3	0.0539944	0.198793	1.49179	WT	caf20∆
YOR128C	25	18	959.66	0.0542099	0.199211	1.16077	caf20∆	WT
YAL038W	53	42	3354.46	0.0543721	0.199432	1.22778	caf20∆	WT
YGL184C	4	2	68.59	0.0545666	0.199771	2.59612	WT	caf20∆
YER010C	5	2	75.69	0.0551848	0.201149	1.41911	WT	caf20∆
YKR093W	3	1	20.16	0.0552378	0.201149	1.34823	caf20∆	WT
YJR076C	9	5	150.04	0.0552939	0.201149	1.19101	WT	caf20∆
YFL014W	8	6	780.31	0.0553545	0.201149	1.57106	WT	caf20∆
YPL037C	8	5	297.19	0.0555081	0.201333	1.11734	caf20∆	WT
YPL120W	4	1	37.26	0.0557381	0.201793	1.58065	caf20∆	WT
YNL275W	4	2	32.53	0.0560142	0.202417	1.97577	caf20∆	WT
YDR348C	4	1	83.36	0.0564015	0.203441	3.36377	WT	caf20∆
YOL005C	3	2	48.7	0.0569784	0.204922	1.49251	WT	caf20∆
YLR438W	17	15	612.44	0.0570216	0.204922	1.25718	caf20∆	WT
YCR052W	5	2	33.83	0.0572812	0.205477	1.26448	caf20∆	WT
YDR390C	5	1	57.73	0.0574029	0.205536	6.12136	caf20∆	WT
YOR124C	7	3	75.67	0.0575398	0.20565	1.6703	WT	caf20∆
YBR049C	13	5	184.01	0.0577899	0.206166	1.59057	caf20∆	WT
YMR305C	5	4	225.54	0.0580807	0.206826	1.40173	caf20∆	WT
YPL225W	10	7	554.29	0.058211	0.206914	1.19548	caf20∆	WT
YGR027C	7	4	352.33	0.0586724	0.208175	1.26811	WT	caf20∆
YGL197W	12	1	113.4	0.0588155	0.208305	1.36999	caf20∆	WT
YNL330C	2	2	95.51	0.0590693	0.208826	1.68257	WT	caf20∆
YKR080W	10	7	308.81	0.0595327	0.210084	1.74997	caf20∆	WT
YDR368W	14	8	509.78	0.059853	0.210833	1.25143	caf20∆	WT
YHR026W	1	1	41.33	0.0603655	0.211799	2.47481	WT	caf20∆
YLR276C	5	3	121.46	0.0604441	0.211799	1.53957	WT	caf20∆
YDR171W	3	3	50.5	0.0605506	0.211799	1.41464	WT	caf20∆
YDR341C	38	28	1323.06	0.0605604	0.211799	1.12668	WT	caf20∆
YJR139C	19	17	1004.77	0.0606964	0.211896	1.2049	caf20∆	WT
YGL139W	4	2	52.39	0.0608181	0.211942	2.421	caf20∆	WT
YBR177C	10	9	482.57	0.0609522	0.212031	1.34481	WT	caf20∆
YGL221C	12	9	393.37	0.0611214	0.212242	1.16249	WT	caf20∆
YGR240C	59	47	3527.64	0.0612822	0.212423	1.18305	caf20∆	WT
YOR340C	3	2	74.15	0.0623756	0.215831	1.16206	WT	caf20∆
YPL228W	5	2	31.35	0.0631232	0.218032	1.32126	caf20∆	WT
YFR004W	7	6	176.91	0.0632695	0.218151	1.12394	WT	caf20∆
YMR278W	10	3	46.63	0.0636214	0.218952	1.33302	WT	caf20∆
YOR316C	4	3	112.35	0.0637256	0.218952	2.28447	WT	caf20∆
YLR438C-A	1	1	15.78	0.063843	0.21897	1.55583	caf20∆	WT
YLR262C	5	2	162.92	0.0642006	0.219429	1.72593	caf20∆	WT
YDL212W	2	1	39.46	0.0642013	0.219429	3.39872	WT	caf20∆
YLR419W	15	7	95.14	0.0643238	0.219464	1.36008	WT	caf20∆
YMR207C	14	1	223.13	0.0646492	0.22019	4.07146	caf20∆	WT
YLR058C	37	34	1973.83	0.0648447	0.220472	1.1357	WT	caf20∆
YBL015W	4	3	82.22	0.0649636	0.220493	1.61584	caf20∆	WT
YOR375C	25	15	1776.25	0.0650936	0.220551	1.12899	caf20∆	WT
R0040C	3	2	98.06	0.0652475	0.220581	4.68539	caf20∆	WT
YPL105C	9	4	103.01	0.065328	0.220581	1.61478	WT	caf20∆
YIL021W	4	2	109.85	0.0655154	0.220655	2.00046	WT	caf20∆
YAR075W	5	1	211.03	0.0655756	0.220655	1.69937	caf20∆	WT
YDL147W	14	6	327.88	0.0658144	0.221078	1.25644	WT	caf20∆
YBR078W	3	3	205.66	0.0659534	0.221164	1.38892	caf20∆	WT
YGR180C	19	16	932.86	0.0666301	0.223051	1.18846	caf20∆	WT
YNL157W	4	2	66.81	0.0669428	0.223715	1.26235	WT	caf20∆
YGR209C	10	6	524.31	0.0671928	0.224167	1.16402	caf20∆	WT
YIL065C	2	1	23.5	0.0673593	0.22429	4.19955	WT	caf20∆
YAL059W	4	1	118	0.0674592	0.22429	1.37293	caf20∆	WT
YKL142W	11	8	623.96	0.0680859	0.22599	1.11103	caf20∆	WT
YPL059W	6	5	262.31	0.068295	0.2263	1.15354	WT	caf20∆
YLR113W	5	4	150.62	0.0684922	0.226455	1.45722	caf20∆	WT
YDR135C	11	4	177.36	0.0685735	0.226455	1.68363	WT	caf20∆
YGR208W	6	6	217.03	0.0688295	0.226917	1.32679	caf20∆	WT
YER024W	5	3	75.94	0.0697935	0.229272	1.65334	WT	caf20∆
YDR284C	2	1	32.72	0.0698732	0.229272	1.5989	WT	caf20∆
YOR164C	6	3	135.5	0.0698956	0.229272	1.37958	WT	caf20∆
YOR356W	6	3	186.03	0.0703276	0.230243	1.90386	WT	caf20∆
YBL056W	10	4	330.7	0.0704803	0.230243	1.67318	caf20∆	WT
YGL171W	7	3	136.12	0.070545	0.230243	1.42876	WT	caf20∆
YBR006W	8	5	116.16	0.0715557	0.233152	1.197	WT	caf20∆
YBL007C	13	6	240.95	0.0717377	0.233356	1.43583	caf20∆	WT
YDL219W	1	1	15.14	0.0719664	0.233711	3.02159	WT	caf20∆
YNL268W	4	3	77.13	0.0721137	0.233801	1.82006	caf20∆	WT
YPL234C	1	1	30.27	0.0725078	0.23469	2.11594	WT	caf20∆
YBR287W	1	1	51.63	0.0726776	0.234851	5.52979	caf20∆	WT
YDR500C	2	1	87.03	0.0730596	0.235695	1.46077	caf20∆	WT
YFR001W	2	2	130.53	0.0732461	0.235908	1.273	WT	caf20∆
YBR121C	43	36	1941.61	0.0739037	0.237634	1.10197	caf20∆	WT
YGR284C	2	2	110.16	0.0741396	0.238002	1.41793	WT	caf20∆
YLR061W	6	3	228.12	0.0743372	0.238245	1.20201	caf20∆	WT
YGL147C	13	1	734.28	0.0745067	0.238397	1.14118	WT	caf20∆
YOR347C	8	5	308.66	0.0747911	0.238546	1.26074	caf20∆	WT
YKL067W	9	8	535.12	0.0747973	0.238546	1.11712	caf20∆	WT
YDL086W	9	7	194.32	0.0751957	0.239426	1.17267	caf20∆	WT
YNL208W	6	5	357.62	0.0755102	0.240037	1.34281	caf20∆	WT
YER122C	15	10	241.23	0.0757103	0.240088	1.29553	caf20∆	WT
YLR356W	2	2	45.48	0.0758695	0.240088	3.14556	WT	caf20∆
YGR020C	6	5	162.76	0.0758947	0.240088	1.15987	WT	caf20∆
YGR106C	1	1	20.57	0.0760462	0.240178	1.74526	caf20∆	WT
YER112W	5	3	126.96	0.07691	0.242515	1.25801	WT	caf20∆
YDL072C	6	4	149.52	0.0779606	0.245431	1.87458	WT	caf20∆
YOR103C	3	3	150.4	0.0787816	0.247036	2.06132	WT	caf20∆
YER083C	3	2	97.62	0.0787833	0.247036	1.858	WT	caf20∆
YJL171C	3	3	71.06	0.0789881	0.247036	1.75859	WT	caf20∆
YHR137W	2	2	56.21	0.0791812	0.247036	1.82841	caf20∆	WT
YBL102W	3	1	131.7	0.0792114	0.247036	1.39732	caf20∆	WT
YOR361C	29	24	979.67	0.0793625	0.247036	1.11016	WT	caf20∆
YEL058W	13	10	546.01	0.0794964	0.247036	1.16578	caf20∆	WT
YGL137W	27	24	921.45	0.0795576	0.247036	1.24054	caf20∆	WT
YDL215C	24	17	748.48	0.0796074	0.247036	1.22646	WT	caf20∆
YGR019W	15	14	273.55	0.0801042	0.248183	1.26339	caf20∆	WT
YER023W	14	10	407.07	0.0802666	0.248293	1.22301	caf20∆	WT
YNL197C	3	2	33.73	0.0806007	0.248933	1.5797	caf20∆	WT
YPR010C-A	1	1	33.39	0.0810924	0.250056	1.38678	WT	caf20∆
YMR266W	3	1	73.43	0.0819139	0.252192	2.78873	caf20∆	WT
YMR261C	16	10	381.43	0.0826273	0.253988	1.1764	WT	caf20∆
YKL114C	5	3	81.23	0.0830065	0.254492	1.40724	caf20∆	WT
YKL065C	4	2	57.19	0.0830516	0.254492	2.44778	WT	caf20∆
YAL062W	12	2	454.72	0.0838025	0.256391	1.92522	WT	caf20∆
YNL175C	9	8	148.35	0.0843115	0.257545	1.61795	WT	caf20∆
YGR095C	3	1	54.51	0.0850445	0.259379	1.56158	caf20∆	WT
YBR143C	19	15	846.74	0.0854267	0.260139	1.27039	WT	caf20∆
YNL045W	4	4	100.95	0.0857004	0.260417	1.21503	caf20∆	WT
YJR123W	16	14	1023.59	0.0857845	0.260417	1.36716	caf20∆	WT
YLR167W;YIL148W	12	8	627.68	0.086062	0.260724	1.22974	caf20∆	WT
YJL069C	5	3	106.1	0.0861522	0.260724	1.29024	caf20∆	WT
YGR116W	30	17	631.45	0.0865873	0.261636	1.23967	caf20∆	WT
YNL287W	20	18	789.04	0.0869173	0.261965	1.13579	caf20∆	WT
YJL180C	4	4	27.14	0.0869642	0.261965	1.41817	WT	caf20∆
YKR057W	8	1	513.38	0.0872832	0.262521	1.34282	caf20∆	WT
YOR226C	4	2	77.61	0.0875397	0.262888	2.4678	WT	caf20∆
YML085C	10	7	453.59	0.0876754	0.262892	1.15572	caf20∆	WT
YNL087W	7	4	181.15	0.0882139	0.264101	2.24174	caf20∆	WT
YIL153W	1	1	30.72	0.0893259	0.266639	2.82081	caf20∆	WT
YMR072W	8	5	152.26	0.0893345	0.266639	1.26169	WT	caf20∆
YDL145C	32	26	925.58	0.0895622	0.266912	1.177	caf20∆	WT
YBR170C	9	3	79.31	0.0897117	0.26695	1.33353	WT	caf20∆
YOL027C	10	6	206.16	0.0901701	0.267907	1.34776	WT	caf20∆
YJL168C	10	2	66.87	0.0904094	0.26821	1.41346	WT	caf20∆
YBR263W	18	12	646.48	0.0905726	0.268287	1.12703	WT	caf20∆
YBR198C	12	4	92.2	0.090843	0.26854	1.35519	caf20∆	WT
YNL001W	6	1	75.78	0.0909326	0.26854	3.64489	WT	caf20∆
YOR056C	3	2	100.74	0.091325	0.269213	1.43123	WT	caf20∆
YKL195W	4	2	41.28	0.0914361	0.269213	1.34208	caf20∆	WT
YDR207C	4	2	28.98	0.0918456	0.270012	1.49917	WT	caf20∆
YDR324C	11	5	154.7	0.0920154	0.270105	1.77348	caf20∆	WT
YDL095W	9	5	103.04	0.0922834	0.270486	1.40024	WT	caf20∆
YPR135W	11	3	133.11	0.0928316	0.271299	1.77919	caf20∆	WT
YMR276W	8	7	220.96	0.0928384	0.271299	1.34809	caf20∆	WT
YNL138W	9	7	292.65	0.0933697	0.271902	1.22649	caf20∆	WT
YML094W	6	4	132.95	0.0934117	0.271902	1.15129	WT	caf20∆
YLR209C	6	5	140.02	0.093462	0.271902	1.23266	WT	caf20∆
YKR070W	4	3	106.01	0.0945909	0.274739	1.20302	caf20∆	WT
YNL173C	6	3	135.49	0.0947182	0.274739	1.71576	WT	caf20∆
YLR035C	6	3	28.8	0.0950689	0.275212	1.74096	caf20∆	WT
YKL212W	16	14	554.93	0.0951628	0.275212	1.4803	caf20∆	WT
YOR061W	8	7	168.42	0.0959104	0.276964	1.26463	caf20∆	WT
YKL104C	34	28	1021.66	0.0963103	0.277709	1.11983	WT	caf20∆
YOR285W	7	7	166.98	0.096685	0.278249	1.23242	caf20∆	WT
YNR035C	8	8	329.38	0.0969142	0.278249	1.09422	caf20∆	WT
YDR289C	7	2	121.32	0.0969244	0.278249	1.49615	WT	caf20∆
YOL133W	1	1	36.38	0.0980555	0.281083	1.97889	caf20∆	WT
YJL101C	5	4	69.49	0.0983972	0.281649	1.16051	WT	caf20∆
YLR221C	5	1	57.2	0.0991267	0.282115	2.32577	caf20∆	WT
YNL123W	15	12	331.82	0.0991557	0.282115	1.21465	caf20∆	WT
YAL016W	12	8	247.76	0.0991974	0.282115	1.23054	WT	caf20∆
YDR510W	6	4	181.13	0.0992726	0.282115	1.18962	caf20∆	WT
YPL217C	10	6	134.53	0.0993394	0.282115	1.16392	WT	caf20∆
YDR399W	14	13	496.73	0.0996375	0.282115	1.14052	caf20∆	WT
YBR154C	3	2	122.61	0.0996466	0.282115	1.88024	caf20∆	WT
YKR018C	13	9	310.44	0.0997144	0.282115	1.20925	WT	caf20∆
YBL101C	10	6	91.02	0.101326	0.286261	1.21247	WT	caf20∆
YGR143W	2	1	74.48	0.102933	0.290329	10.4426	WT	caf20∆
YDL014W	15	11	496.65	0.103063	0.290329	1.16199	WT	caf20∆
YPL126W	5	2	57.96	0.103224	0.290364	1.60201	WT	caf20∆
YOR096W	18	8	503.11	0.103466	0.290466	1.23268	caf20∆	WT
YLR083C	4	4	176.29	0.103624	0.290466	1.17872	caf20∆	WT
YMR226C	16	12	750.7	0.103764	0.290466	1.08162	WT	caf20∆
YGR184C	13	7	123.36	0.103855	0.290466	1.44643	caf20∆	WT
YHR053C	1	1	65.38	0.104216	0.291061	3.56583	caf20∆	WT
YHR158C	15	10	161.67	0.104425	0.291229	1.66074	caf20∆	WT
YKL081W	23	15	982.69	0.104751	0.29172	1.19447	caf20∆	WT
YDL141W	4	2	29.82	0.105312	0.292866	1.21921	WT	caf20∆
YPR180W	2	2	39.8	0.105759	0.293692	1.4557	WT	caf20∆
YER134C	4	2	53.22	0.105943	0.293748	1.64042	WT	caf20∆
YOL086C	25	13	1643.35	0.10608	0.293748	1.37666	caf20∆	WT
YIL136W	5	3	211.17	0.106928	0.295678	2.08827	caf20∆	WT
YMR189W	22	16	719.56	0.107868	0.297855	1.18427	WT	caf20∆
YOL006C	9	3	70.2	0.108587	0.29908	1.55362	WT	caf20∆
YDR380W	2	1	19.05	0.108689	0.29908	1.47225	caf20∆	WT
YDR068W	7	3	114.59	0.10877	0.29908	1.40143	caf20∆	WT
YOR341W	28	17	766.91	0.109681	0.300405	1.30756	caf20∆	WT
YOR181W	7	2	69.53	0.109848	0.300405	4.2614	caf20∆	WT
YDL052C	5	2	53.81	0.109875	0.300405	1.74735	caf20∆	WT
YEL034W	12	9	705.18	0.109932	0.300405	1.14552	caf20∆	WT
YMR075W	9	1	84.45	0.11002	0.300405	1.25239	WT	caf20∆
YLR314C	15	8	564.09	0.110332	0.300787	1.26466	caf20∆	WT
YLR380W	7	6	224.61	0.110468	0.300787	1.30698	caf20∆	WT
YDR513W	6	5	181.91	0.110939	0.301648	1.1515	caf20∆	WT
YNL098C	7	5	246.45	0.111295	0.301666	1.3778	caf20∆	WT
YMR071C	2	2	42.77	0.11133	0.301666	1.68671	WT	caf20∆
YIL138C	13	10	379.78	0.111408	0.301666	1.15723	WT	caf20∆
YBR053C	9	7	228.13	0.111578	0.301708	1.16928	caf20∆	WT
YOR232W	7	6	347.01	0.112632	0.304138	1.29063	caf20∆	WT
YKL113C	4	2	40.25	0.112812	0.304202	1.54321	WT	caf20∆
YNR033W	7	1	44.38	0.113384	0.305326	3.15078	caf20∆	WT
YMR058W	6	6	109.87	0.113652	0.305625	1.37887	caf20∆	WT
YIL083C	9	9	291.8	0.114069	0.306325	1.28353	WT	caf20∆
YBR029C	4	1	89.57	0.114561	0.306944	2.08422	WT	caf20∆
YEL003W	2	1	38.01	0.114617	0.306944	1.88282	WT	caf20∆
YGR037C	8	6	553.4	0.11477	0.306944	1.28858	caf20∆	WT
YNL207W	2	1	79.88	0.115341	0.308048	1.23365	WT	caf20∆
YOR195W	11	4	98	0.115823	0.308914	1.44725	caf20∆	WT
YBL036C	11	7	276.77	0.117276	0.312362	1.09115	caf20∆	WT
YHR001W	7	3	67.63	0.117643	0.312658	1.33778	WT	caf20∆
YJR069C	9	9	384.59	0.117779	0.312658	1.4514	caf20∆	WT
YPL139C	3	1	56.49	0.117866	0.312658	1.51804	caf20∆	WT
YBR169C	19	5	680.34	0.118195	0.312876	1.37217	WT	caf20∆
YDL122W	7	4	106.39	0.118351	0.312876	1.25982	WT	caf20∆
YOR091W	6	4	176.9	0.118429	0.312876	1.20641	caf20∆	WT
YPR108W	11	9	340.83	0.118924	0.31376	1.17156	caf20∆	WT
YOR293W	9	7	440.31	0.120068	0.316351	1.18133	WT	caf20∆
YHR005C-A	2	2	116.07	0.121086	0.318326	1.40681	caf20∆	WT
YDR170W-A	7	1	239.38	0.121278	0.318326	1.96594	WT	caf20∆
YIL052C	5	2	199.98	0.121351	0.318326	1.16349	caf20∆	WT
YDR234W	15	9	395.34	0.121469	0.318326	1.24045	WT	caf20∆
YKR084C	10	8	106.66	0.121709	0.318528	1.1561	WT	caf20∆
YIR037W	6	4	201.61	0.1222	0.319386	1.37153	caf20∆	WT
YKL054C	17	16	333.64	0.122395	0.319469	1.12514	caf20∆	WT
YHR132W-A	5	3	53.81	0.122597	0.319569	1.27224	WT	caf20∆
YGR111W	4	4	91.46	0.122911	0.319962	1.171	WT	caf20∆
YGR185C	21	14	804.06	0.1231	0.320028	1.11647	WT	caf20∆
YBR042C	4	2	45.75	0.123595	0.320887	3.01347	WT	caf20∆
YEL057C	2	1	23.8	0.124663	0.32262	Inf	caf20∆	WT
YER025W	23	18	908.51	0.124674	0.32262	1.08499	caf20∆	WT
YJL136C	8	1	578.19	0.124757	0.32262	1.33944	caf20∆	WT
YER091C	53	46	3631.87	0.125379	0.323286	1.09804	WT	caf20∆
YBR085W	6	1	86.41	0.12543	0.323286	1.58795	caf20∆	WT
YOR270C	14	10	697.6	0.125511	0.323286	1.56294	WT	caf20∆
YHR146W	12	8	320.4	0.126358	0.325039	1.18867	caf20∆	WT
YFL038C	8	4	284.55	0.126603	0.325241	1.09594	caf20∆	WT
YAL044C	6	5	511.16	0.127079	0.326035	1.13565	WT	caf20∆
YML057W	3	3	62.38	0.127471	0.326614	1.1091	caf20∆	WT
YLL022C	4	2	35	0.127664	0.326679	1.24038	caf20∆	WT
YCR088W	23	18	751.5	0.128162	0.327526	1.16254	caf20∆	WT
YDR381W	10	4	375.11	0.128469	0.32788	1.15722	WT	caf20∆
YDR070C	2	2	22.44	0.128869	0.328474	3.98972	WT	caf20∆
YPL098C	1	1	17.43	0.129156	0.328776	2.01208	caf20∆	WT
YOL016C	3	1	24.68	0.129527	0.32929	1.1751	WT	caf20∆
YNL241C	23	18	929.55	0.129814	0.329594	1.07943	WT	caf20∆
YNR038W	5	1	65.53	0.130201	0.330147	2.07367	WT	caf20∆
YKR095W	24	14	279.39	0.131926	0.334086	1.26888	caf20∆	WT
YMR138W	1	1	15.25	0.132503	0.335115	1.59936	caf20∆	WT
YMR275C	7	2	53.05	0.132943	0.335585	2.42076	caf20∆	WT
YHL001W;YKL006W	13	6	659.53	0.133156	0.335585	1.30693	caf20∆	WT
YDL120W	2	2	114.38	0.133209	0.335585	1.25008	caf20∆	WT
YER136W	17	12	363.68	0.133376	0.335585	1.25502	caf20∆	WT
YOR042W	9	5	134.87	0.133707	0.335985	1.11101	WT	caf20∆
YDR025W	12	10	573.82	0.134469	0.336787	1.1659	WT	caf20∆
YKL033W-A	7	5	300.95	0.134505	0.336787	1.16272	caf20∆	WT
YIL133C	19	7	654.57	0.134543	0.336787	1.19871	WT	caf20∆
YPR091C	6	5	66.74	0.135075	0.337342	1.22811	WT	caf20∆
YDR394W	10	7	376.86	0.135109	0.337342	1.29785	caf20∆	WT
YOR260W	4	2	54.89	0.135398	0.337631	1.27409	WT	caf20∆
YER019C-A	3	3	69.76	0.136335	0.339535	1.33262	WT	caf20∆
YDR141C	15	3	90.6	0.137892	0.342551	2.11196	WT	caf20∆
YJR017C	6	4	217.52	0.137897	0.342551	1.07758	caf20∆	WT
YER164W	8	2	98.72	0.138089	0.342594	3.09837	WT	caf20∆
YGL100W	3	3	71.56	0.138364	0.342841	1.28388	WT	caf20∆
YIL109C	15	11	422.14	0.138885	0.343697	1.12306	WT	caf20∆
YJL128C	3	1	26.14	0.1401	0.346265	1.59677	caf20∆	WT
YDR345C	8	7	294.01	0.141097	0.348288	1.48589	caf20∆	WT
YCL008C	2	2	26.23	0.142964	0.352451	2.36708	WT	caf20∆
YPL269W	6	2	30.13	0.143343	0.35294	1.84236	caf20∆	WT
YGR094W	56	38	2348.78	0.14362	0.353177	1.09544	caf20∆	WT
YGL244W	7	4	98.74	0.144167	0.354079	1.15952	caf20∆	WT
YHR012W	2	1	37.98	0.144925	0.355494	1.19621	caf20∆	WT
YLR421C	4	4	86.62	0.145609	0.356521	1.24243	caf20∆	WT
YHR047C	15	10	441.87	0.145709	0.356521	1.21494	caf20∆	WT
YDR212W	18	11	630.74	0.146201	0.356888	1.17237	caf20∆	WT
YBR207W	2	1	51.21	0.146261	0.356888	2.70919	WT	caf20∆
YPL249C	6	2	106.33	0.146406	0.356888	1.31519	WT	caf20∆
YOL111C	2	2	52.48	0.147569	0.359274	1.2647	caf20∆	WT
YNL148C	6	1	50.89	0.148248	0.36035	1.31269	caf20∆	WT
YOL121C	15	8	633.29	0.148548	0.36035	1.16434	caf20∆	WT
YMR125W	14	10	335.23	0.148617	0.36035	2.04561	caf20∆	WT
YBL099W	29	20	1078.5	0.148748	0.36035	1.17823	WT	caf20∆
YIL053W	22	13	1351.84	0.149108	0.360776	1.13555	caf20∆	WT
YHR063C	12	8	412.17	0.151303	0.365223	1.12785	WT	caf20∆
YDL092W	2	2	93.48	0.15132	0.365223	1.12334	WT	caf20∆
YCL059C	8	5	136.02	0.152654	0.367988	1.16219	WT	caf20∆
YJR093C	1	1	34.24	0.152918	0.368172	1.40152	WT	caf20∆
YBR052C	3	3	126.73	0.153239	0.368291	1.4223	WT	caf20∆
YHR112C	7	4	75.74	0.153345	0.368291	1.23314	caf20∆	WT
YPR073C	3	2	47.82	0.153792	0.368913	1.31143	WT	caf20∆
YGL065C	5	3	184.24	0.154063	0.369108	1.91476	caf20∆	WT
YPL263C	9	6	283.19	0.154349	0.369341	1.22756	WT	caf20∆
YNL085W	5	3	117.11	0.154826	0.369717	1.46168	WT	caf20∆
YJL014W	17	13	499.21	0.154889	0.369717	1.12644	WT	caf20∆
YKR003W	7	1	49.75	0.155111	0.369717	1.51276	WT	caf20∆
YJR088C	6	3	255.49	0.155449	0.369717	2.22724	caf20∆	WT
YJR002W	10	3	132.51	0.155587	0.369717	1.39545	WT	caf20∆
YOR112W	7	2	49.24	0.155647	0.369717	2.72195	caf20∆	WT
YOR363C	6	1	47.81	0.15583	0.369717	1.39113	WT	caf20∆
YDR059C	2	1	70.91	0.156941	0.371902	2.2377	caf20∆	WT
YNL263C	2	2	31.54	0.157198	0.372062	1.37864	WT	caf20∆
YMR129W	6	3	45.88	0.158637	0.375013	1.40808	WT	caf20∆
YIR035C	3	2	60.65	0.159414	0.376259	1.66109	WT	caf20∆
YNL274C	6	2	105.73	0.159617	0.376259	1.24626	WT	caf20∆
YCL018W	4	3	66.57	0.15996	0.376259	4.23093	WT	caf20∆
YOL098C	12	7	180.47	0.159978	0.376259	1.10426	caf20∆	WT
YOR253W	2	2	137.78	0.160127	0.376259	1.46366	WT	caf20∆
YDR378C	4	4	179.32	0.16209	0.380416	1.22501	caf20∆	WT
YER089C	10	6	346.13	0.163271	0.382727	1.11043	WT	caf20∆
YMR217W	27	20	1149.79	0.164101	0.38414	1.07983	WT	caf20∆
YGL129C	5	1	24.52	0.164309	0.38414	1.23691	caf20∆	WT
YMR308C	9	7	238.39	0.164463	0.38414	1.27723	WT	caf20∆
YKR001C	23	17	539.91	0.16481	0.384492	1.15251	WT	caf20∆
YHR030C	4	2	48.19	0.165586	0.385366	2.05394	WT	caf20∆
YNL088W	15	3	112.17	0.165635	0.385366	1.60526	WT	caf20∆
YOR202W	4	3	58.2	0.165776	0.385366	1.64756	WT	caf20∆
YGL253W	34	25	1761.14	0.16727	0.388376	1.14476	caf20∆	WT
YHR020W	34	25	1495.17	0.168025	0.389233	1.07936	WT	caf20∆
YBL058W	12	7	382.62	0.168037	0.389233	1.15017	caf20∆	WT
YBR214W	4	2	79.18	0.168327	0.389443	1.33616	WT	caf20∆
YGR192C	37	11	2437.19	0.169176	0.390944	1.39737	caf20∆	WT
YGR233C	11	3	109.66	0.169431	0.391071	1.58104	caf20∆	WT
YKR081C	5	2	149.68	0.171005	0.394046	1.41299	WT	caf20∆
YKL127W	13	11	399.64	0.171174	0.394046	1.14977	caf20∆	WT
YGR232W	4	4	100.36	0.171324	0.394046	1.23774	WT	caf20∆
YDR050C	21	18	1358.12	0.172565	0.396434	1.18463	caf20∆	WT
YDR100W	1	1	15.05	0.17306	0.397095	11.1035	WT	caf20∆
YNL102W	13	4	63.98	0.173259	0.397095	1.43163	caf20∆	WT
YGR204W	44	33	1930.23	0.173881	0.398052	1.08161	caf20∆	WT
YOL123W	5	5	156.82	0.174401	0.398776	1.21315	caf20∆	WT
YML126C	21	15	889.36	0.174991	0.399659	1.10915	caf20∆	WT
YFR010W	10	9	283.56	0.176039	0.401583	1.12092	WT	caf20∆
YAL022C	2	1	14.73	0.176689	0.402596	10.6369	caf20∆	WT
YGR189C	5	3	207.09	0.177111	0.403087	1.3328	WT	caf20∆
YOR265W	6	6	232.04	0.177701	0.403801	1.16303	caf20∆	WT
YJL087C	6	3	22.33	0.177915	0.403801	1.59524	WT	caf20∆
YOR290C	11	3	67.05	0.178191	0.403801	1.47916	WT	caf20∆
YLR364W	3	3	59.95	0.178251	0.403801	1.40953	caf20∆	WT
YJL041W	20	17	381.3	0.179303	0.405531	1.19007	caf20∆	WT
YKL035W	28	21	1177.46	0.179429	0.405531	1.08414	caf20∆	WT
YDL185W	60	53	2885.56	0.17996	0.406262	1.08398	WT	caf20∆
YGL056C	6	4	99.44	0.180824	0.407721	1.43419	WT	caf20∆
YJR064W	18	14	616.62	0.181089	0.407721	1.14231	caf20∆	WT
YDR483W	10	9	290.27	0.181233	0.407721	1.14731	caf20∆	WT
YPL146C	8	3	82.15	0.183207	0.411688	1.31732	WT	caf20∆
YDR168W	19	12	364.92	0.183733	0.412397	1.22467	WT	caf20∆
YGL019W	1	1	36.72	0.184282	0.413156	1.4788	caf20∆	WT
YGL198W	1	1	30.32	0.184955	0.414188	1.15487	WT	caf20∆
YDR144C	3	2	32.36	0.185228	0.414288	1.21414	caf20∆	WT
YEL031W	22	15	664.68	0.185423	0.414288	1.19949	caf20∆	WT
YCR009C	13	8	269.03	0.186324	0.415504	1.22158	WT	caf20∆
YML110C	6	4	64.83	0.186565	0.415504	1.30637	WT	caf20∆
YLL045C	23	4	1490.31	0.186805	0.415504	1.1499	WT	caf20∆
YOL040C	8	6	598.96	0.187018	0.415504	1.13247	WT	caf20∆
YGR033C	2	1	56.26	0.18703	0.415504	1.32921	caf20∆	WT
YDL081C	2	1	196.8	0.187376	0.4158	2.62179	caf20∆	WT
YGR285C	22	18	857.05	0.188258	0.417284	1.21865	caf20∆	WT
YCR031C	11	10	659.14	0.188513	0.417376	1.10083	WT	caf20∆
YGR186W	12	6	85.55	0.189364	0.418786	1.33367	caf20∆	WT
YGR009C	6	2	105.56	0.1898	0.418905	1.28546	WT	caf20∆
YAR002C-A	2	2	34.4	0.189855	0.418905	1.12214	WT	caf20∆
YPR165W	9	5	299.15	0.19006	0.418905	1.26731	WT	caf20∆
YDR497C	3	2	66.77	0.190486	0.418937	1.63946	WT	caf20∆
YMR024W	4	2	41.7	0.190504	0.418937	1.37173	WT	caf20∆
YNR016C	96	77	3665.09	0.191707	0.421109	1.11647	caf20∆	WT
YPL031C	6	2	102.94	0.192333	0.42201	1.3482	WT	caf20∆
YBR085C-A	4	3	194.88	0.192584	0.422063	1.23247	caf20∆	WT
YNL036W	3	1	33.35	0.192789	0.422063	3.61368	caf20∆	WT
YGL001C	3	2	143.83	0.193573	0.422696	1.66469	caf20∆	WT
YER048C	10	7	429.61	0.193622	0.422696	1.1563	WT	caf20∆
YNL248C	12	6	194.96	0.193784	0.422696	1.23227	WT	caf20∆
YGR214W	13	2	665.01	0.193943	0.422696	1.47798	caf20∆	WT
YNL280C	2	2	72.65	0.194557	0.423562	1.05011	WT	caf20∆
YMR235C	14	12	542.92	0.194842	0.42371	1.10229	caf20∆	WT
YDL173W	2	2	61.21	0.196904	0.427296	1.29965	WT	caf20∆
YBR130C	3	1	74.64	0.196928	0.427296	1.74121	WT	caf20∆
YGL238W	9	7	229.27	0.197311	0.427635	1.20637	WT	caf20∆
YCL030C	48	39	2525.89	0.197521	0.427635	1.06496	WT	caf20∆
YNL290W	2	2	101.28	0.198475	0.429224	2.09322	WT	caf20∆
YLR216C	21	16	608.95	0.199084	0.429848	1.10177	WT	caf20∆
YOR133W	68	57	4253.77	0.199203	0.429848	1.18959	caf20∆	WT
YLR450W	3	1	33.29	0.199937	0.430694	3.51305	WT	caf20∆
YGL030W	9	9	734	0.200131	0.430694	1.15292	caf20∆	WT
YJL184W	5	4	137.92	0.200256	0.430694	1.20742	WT	caf20∆
YPR074C	32	26	1355.08	0.201029	0.431881	1.11765	caf20∆	WT
YMR205C	34	28	1715.5	0.201902	0.433281	1.09799	caf20∆	WT
YGR157W	10	4	187.56	0.202627	0.43436	1.30076	caf20∆	WT
YDL148C	9	3	136.84	0.203079	0.434851	1.45141	WT	caf20∆
YGR271C-A	4	2	79.86	0.205268	0.438908	1.62322	WT	caf20∆
YHR009C	7	6	227.52	0.20561	0.438908	1.14052	caf20∆	WT
YBR127C	31	23	1813.62	0.205647	0.438908	1.16583	caf20∆	WT
YIL008W	1	1	79.83	0.20637	0.439972	2.6604	caf20∆	WT
YBR096W	3	2	79.25	0.206829	0.440288	1.58513	WT	caf20∆
YOL144W	3	1	31.73	0.206982	0.440288	3.32798	WT	caf20∆
YIR036C	5	4	178.14	0.207195	0.440288	1.3323	WT	caf20∆
YPR139C	1	1	45.78	0.207963	0.441441	4.70252	WT	caf20∆
YEL042W	8	6	194.53	0.208215	0.441496	1.1227	WT	caf20∆
YLR290C	2	1	17.42	0.209167	0.443034	3.43819	WT	caf20∆
YNL255C	6	5	284.97	0.21085	0.446117	1.3245	WT	caf20∆
YGL234W	37	32	1842.94	0.211894	0.44784	1.14833	caf20∆	WT
YPR052C	4	2	139.92	0.213128	0.449963	1.4685	caf20∆	WT
YGL041W-A	1	1	15.76	0.213554	0.450376	2.15049	WT	caf20∆
YGR147C	2	2	16.2	0.213991	0.450522	1.98005	caf20∆	WT
YLR370C	6	3	153.26	0.214523	0.450522	1.28477	caf20∆	WT
YEL054C	12	9	771.43	0.21469	0.450522	1.10244	caf20∆	WT
YPL170W	5	3	136.89	0.21488	0.450522	1.26464	WT	caf20∆
YBL003C	4	2	153.97	0.215048	0.450522	1.23595	WT	caf20∆
YIL162W	2	2	28.45	0.215109	0.450522	1.18273	WT	caf20∆
YML052W	4	2	100.27	0.215237	0.450522	1.68877	WT	caf20∆
YLR002C	7	2	114.22	0.216336	0.451202	1.86695	WT	caf20∆
YCR077C	7	3	109.72	0.21638	0.451202	1.2777	WT	caf20∆
YJL111W	15	11	592.91	0.216437	0.451202	1.23768	caf20∆	WT
YDR487C	9	9	394.27	0.216633	0.451202	1.15379	WT	caf20∆
YIL091C	5	2	65.23	0.216893	0.451202	1.47153	WT	caf20∆
YGR086C	16	11	1004.76	0.216954	0.451202	1.1146	caf20∆	WT
YBR014C	2	2	28.74	0.217177	0.451202	1.18657	WT	caf20∆
YGR001C	4	3	130.08	0.218129	0.452331	1.06935	WT	caf20∆
YPL266W	8	3	133.57	0.218217	0.452331	1.6807	WT	caf20∆
YPR086W	6	1	86.54	0.218414	0.452331	4.8689	WT	caf20∆
YHR074W	9	8	205.42	0.218728	0.452501	1.14783	WT	caf20∆
YJR004C	3	3	68.99	0.219802	0.454242	1.77493	caf20∆	WT
YBR126W-A	3	1	23.65	0.220994	0.456224	17.4799	WT	caf20∆
YPL058C	12	4	103.17	0.222384	0.458609	1.17172	caf20∆	WT
YPR173C	8	3	64.43	0.223138	0.45932	1.24368	WT	caf20∆
YDL082W	10	1	466.35	0.223199	0.45932	31.6397	caf20∆	WT
YNL044W	5	3	152.87	0.224752	0.46203	1.46382	WT	caf20∆
YKL093W	2	1	21.54	0.226402	0.464933	1.39856	WT	caf20∆
YER168C	6	4	70.06	0.227035	0.465208	1.17261	WT	caf20∆
YBR286W	13	10	471.37	0.227121	0.465208	1.06811	WT	caf20∆
YKL028W	8	4	91.2	0.22725	0.465208	1.61797	WT	caf20∆
YNL181W	11	5	76.22	0.227793	0.465832	1.3007	caf20∆	WT
YEL024W	2	1	100.02	0.2284	0.466185	1.85376	WT	caf20∆
YHR051W	4	4	208.7	0.228442	0.466185	1.35458	WT	caf20∆
YLR027C	21	19	1088.62	0.22927	0.467387	1.06645	WT	caf20∆
YPR154W	2	2	89.96	0.229604	0.467578	1.59489	caf20∆	WT
YAR002W	6	5	102.24	0.230582	0.469083	1.32382	caf20∆	WT
YER143W	3	2	28.65	0.230951	0.469126	1.27195	caf20∆	WT
YLR335W	15	11	354.47	0.231084	0.469126	1.09537	caf20∆	WT
YIR003W	3	2	51.27	0.231687	0.469863	1.95879	WT	caf20∆
YOR209C	13	10	449.34	0.232079	0.470171	1.10568	caf20∆	WT
YGR181W	3	3	210.91	0.232657	0.470643	1.15488	WT	caf20∆
YPL215W	8	4	78.94	0.232798	0.470643	1.47478	WT	caf20∆
YJL183W	5	4	63.14	0.233035	0.470643	1.2157	caf20∆	WT
YOL060C	2	2	26.72	0.233713	0.471527	1.26572	WT	caf20∆
YOR194C	1	1	58.62	0.23451	0.472646	1.99621	caf20∆	WT
YGL189C	4	3	252.24	0.235229	0.473607	1.18915	caf20∆	WT
YCL050C	12	12	483.18	0.235857	0.473934	1.11095	caf20∆	WT
YPR147C	3	2	30.96	0.235876	0.473934	1.18953	caf20∆	WT
YPL078C	4	3	278.22	0.237621	0.476951	1.42675	WT	caf20∆
YPR020W	2	1	63.05	0.238366	0.477953	1.90541	WT	caf20∆
YLL048C	24	11	324.89	0.238918	0.478571	1.58096	WT	caf20∆
YDL125C	6	4	306.13	0.239361	0.478966	1.21217	caf20∆	WT
YOL021C	10	8	269.97	0.240343	0.480018	1.19163	WT	caf20∆
YML035C	9	5	139.7	0.240377	0.480018	1.14545	caf20∆	WT
YJL026W	18	12	594.36	0.240675	0.480123	1.08797	caf20∆	WT
YJR073C	2	2	79.77	0.241231	0.480293	3.49009	caf20∆	WT
YML026C	19	14	737.26	0.241252	0.480293	1.10724	WT	caf20∆
YPR036W	16	13	467.37	0.242318	0.481924	1.11656	WT	caf20∆
YPL129W	4	4	157.83	0.243639	0.483489	1.18144	WT	caf20∆
YIL051C	6	6	384.31	0.243839	0.483489	1.27895	WT	caf20∆
YDR299W	5	4	85.91	0.244015	0.483489	1.31684	caf20∆	WT
YMR076C	6	2	47.34	0.244094	0.483489	1.55481	caf20∆	WT
YLR262C-A	4	3	106.16	0.244654	0.484107	1.14268	WT	caf20∆
YPL143W	7	1	401.12	0.245692	0.48567	1.09122	caf20∆	WT
YML128C	6	5	116.03	0.245977	0.485742	1.52948	WT	caf20∆
YLR044C	42	32	3404.59	0.246383	0.486052	1.12998	caf20∆	WT
YPR189W	11	5	119.25	0.246942	0.486664	1.39208	caf20∆	WT
YPL028W	20	17	1119.52	0.247502	0.487277	1.09238	caf20∆	WT
YJL109C	17	12	391.9	0.247879	0.487528	1.22387	WT	caf20∆
YLR178C	6	6	189.93	0.248276	0.487819	1.09745	WT	caf20∆
YGL068W	7	1	100.55	0.248891	0.488481	1.26107	caf20∆	WT
YLR389C	9	5	145.08	0.249293	0.488481	1.19745	caf20∆	WT
YDR044W	5	2	53.67	0.249363	0.488481	1.17843	caf20∆	WT
YIL121W	3	2	91.75	0.250286	0.489799	1.11345	caf20∆	WT
YJL081C	2	1	47.08	0.250863	0.490127	1.78356	WT	caf20∆
YDR457W	27	11	299.53	0.250955	0.490127	1.21393	WT	caf20∆
YKL010C	11	7	242.67	0.252186	0.491835	1.2515	WT	caf20∆
YHR107C	12	8	230.88	0.252465	0.491835	1.1524	caf20∆	WT
YDR097C	14	2	70.06	0.252799	0.491835	1.6499	caf20∆	WT
YML124C	14	11	506.66	0.252836	0.491835	1.1634	WT	caf20∆
YJL178C	4	3	52.09	0.253185	0.492024	1.88674	WT	caf20∆
YIL108W	4	4	71.55	0.254882	0.494625	1.22356	caf20∆	WT
YOR157C	5	4	139.71	0.255029	0.494625	1.50826	caf20∆	WT
YMR300C	23	19	768.97	0.255361	0.49467	1.17012	caf20∆	WT
YEL037C	10	10	376.19	0.255558	0.49467	1.09973	WT	caf20∆
YOR016C	4	1	87.64	0.256006	0.494683	1.73513	WT	caf20∆
YCR073W-A	5	4	189.29	0.256071	0.494683	1.15061	WT	caf20∆
YDR032C	5	4	297.63	0.257044	0.496071	1.14565	caf20∆	WT
YHR119W	8	1	83.48	0.258597	0.498577	3.36517	WT	caf20∆
YBL041W	7	7	173.8	0.258884	0.498639	1.19908	caf20∆	WT
YOR155C	5	3	72.13	0.259849	0.500005	1.62096	WT	caf20∆
YGL111W	5	2	78.99	0.260349	0.500391	1.56483	WT	caf20∆
YFL045C	18	14	745.19	0.260562	0.500391	1.07589	WT	caf20∆
YDL108W	4	1	57.73	0.262272	0.50234	1.64368	WT	caf20∆
YPL171C	3	1	40.53	0.262517	0.50234	3.27012	WT	caf20∆
YDR238C	24	15	930.11	0.262544	0.50234	1.05564	caf20∆	WT
YDR493W	4	2	52.81	0.262605	0.50234	1.17303	WT	caf20∆
YER146W	2	2	97.85	0.264658	0.505509	1.2719	caf20∆	WT
YHR027C	26	22	1087.37	0.264778	0.505509	1.05089	caf20∆	WT
YGL013C	4	2	51	0.265672	0.506721	1.43018	WT	caf20∆
YOR051C	10	6	252.74	0.266321	0.507464	1.17305	WT	caf20∆
YER036C	21	17	1086.13	0.266761	0.507807	1.09587	WT	caf20∆
YLR291C	5	3	89.48	0.268683	0.510969	1.18038	WT	caf20∆
YMR179W	8	1	63.71	0.269161	0.51138	1.1835	WT	caf20∆
YOR332W	15	13	775.73	0.269748	0.511997	1.08771	caf20∆	WT
YMR297W	9	8	234.29	0.270857	0.513603	1.19808	WT	caf20∆
YNL070W	1	1	71.54	0.27216	0.515575	1.3737	WT	caf20∆
YOR310C	17	15	630.37	0.272591	0.515892	1.10306	caf20∆	WT
YMR099C	21	16	823.06	0.273106	0.516367	1.08503	caf20∆	WT
YNL113W	6	5	260.49	0.273793	0.517088	1.15103	WT	caf20∆
YBR041W	6	2	37.56	0.274208	0.517088	1.27482	WT	caf20∆
YEL002C	6	6	212.74	0.274282	0.517088	1.39489	WT	caf20∆
YDR356W	14	2	71.83	0.276443	0.520548	1.46094	caf20∆	WT
YDR285W	11	1	62.07	0.276711	0.520548	1.89534	WT	caf20∆
YOR234C	8	2	415.14	0.276957	0.520548	1.07634	caf20∆	WT
YNL035C	2	1	29.54	0.277224	0.520548	1.11334	WT	caf20∆
YGL016W	5	1	39.38	0.277448	0.520548	1.23502	WT	caf20∆
YDL100C	8	5	316.84	0.277969	0.521025	1.16931	caf20∆	WT
YER070W	14	8	415.1	0.278407	0.521245	1.12739	WT	caf20∆
YLR181C	4	1	31.75	0.278735	0.521245	1.16674	WT	caf20∆
YDR465C	4	2	60.5	0.278886	0.521245	1.60258	WT	caf20∆
YGR038W	1	1	21.77	0.279479	0.521854	1.58476	caf20∆	WT
YNL014W	18	2	913.16	0.28027	0.522832	1.28097	WT	caf20∆
YEL038W	3	2	90.8	0.280636	0.523015	1.1705	caf20∆	WT
YJL193W	1	1	16.79	0.281795	0.524661	1.42572	caf20∆	WT
YOR323C	19	14	706.46	0.282056	0.524661	1.08664	WT	caf20∆
YHR049W	10	9	263.94	0.282516	0.525018	1.17058	caf20∆	WT
YOR239W	10	6	204	0.283198	0.525603	1.10017	caf20∆	WT
YOR126C	2	2	30.04	0.283372	0.525603	1.92584	WT	caf20∆
YPR169W	5	2	48.12	0.283795	0.525603	1.14947	WT	caf20∆
YIL078W	38	33	1794.23	0.283906	0.525603	1.06618	caf20∆	WT
YCR017C	1	1	15.77	0.284562	0.525694	2.25752	WT	caf20∆
YLR172C	6	2	203.97	0.284956	0.525694	1.1506	WT	caf20∆
YLR324W	2	2	32.22	0.284999	0.525694	1.34673	WT	caf20∆
YJL045W	3	1	51.21	0.285031	0.525694	1.07748	WT	caf20∆
YLR328W	3	2	103.23	0.28567	0.526375	1.23345	caf20∆	WT
YDL140C	26	20	698.43	0.286944	0.528225	1.05907	WT	caf20∆
YOR362C	9	8	252.13	0.287483	0.52872	1.11652	WT	caf20∆
YOR187W	16	14	569.8	0.288361	0.529835	1.04648	WT	caf20∆
YOR210W	4	3	102.14	0.288848	0.529835	1.90926	caf20∆	WT
YDR502C	24	11	1313.02	0.288903	0.529835	1.08842	WT	caf20∆
YAL012W	14	12	894.85	0.289442	0.530328	1.10974	caf20∆	WT
YML103C	9	5	206	0.289849	0.530394	3.56637	WT	caf20∆
YML096W	2	1	20.82	0.290021	0.530394	4.60213	WT	caf20∆
YGR231C	4	3	176.35	0.291033	0.531746	2.70171	WT	caf20∆
YKL207W	2	1	80.33	0.291615	0.532217	2.1813	WT	caf20∆
YNR034W-A	1	1	101.48	0.291835	0.532217	1.92044	WT	caf20∆
YLR332W	1	1	59.26	0.293542	0.534437	1.51913	WT	caf20∆
YOR257W	3	2	61.35	0.293599	0.534437	1.40241	WT	caf20∆
YJR047C	4	1	116.36	0.294937	0.536374	345.176	WT	caf20∆
YKL128C	4	4	61.02	0.295257	0.536457	1.26523	caf20∆	WT
YBR086C	6	2	116.28	0.296268	0.537794	4.76801	WT	caf20∆
YPR024W	12	5	95.84	0.296827	0.537812	1.09128	WT	caf20∆
YLR248W	8	4	113.13	0.297293	0.537812	1.13655	WT	caf20∆
YGL207W	24	16	747.77	0.297339	0.537812	1.20662	caf20∆	WT
YLL018C	31	28	1523.78	0.297378	0.537812	1.06959	caf20∆	WT
YMR269W	3	2	108.59	0.298739	0.539392	1.42375	caf20∆	WT
YGR269W	2	1	20.24	0.298804	0.539392	1.46346	WT	caf20∆
YLR025W	5	3	99.76	0.299357	0.539578	1.13482	WT	caf20∆
YLR398C	16	5	136.5	0.299459	0.539578	1.29713	WT	caf20∆
YGR169C-A	3	1	125.29	0.30055	0.541046	1.23358	caf20∆	WT
YKR048C	10	10	612.4	0.30208	0.542855	1.09543	WT	caf20∆
YMR186W	51	10	3375.25	0.30211	0.542855	1.151	caf20∆	WT
YDR331W	1	1	19.15	0.302649	0.543177	1.481	caf20∆	WT
YLR397C	9	5	120.09	0.302846	0.543177	1.18333	WT	caf20∆
YKR008W	8	2	74.13	0.303669	0.544154	4.11843	WT	caf20∆
YMR229C	41	26	1058.67	0.304246	0.54469	1.12292	WT	caf20∆
YML028W	14	12	932.85	0.30462	0.54486	1.07849	caf20∆	WT
YKL013C	5	4	123.07	0.306074	0.546404	1.12778	caf20∆	WT
YGR103W	14	14	381.83	0.306158	0.546404	1.10591	WT	caf20∆
YGL103W	9	7	338.98	0.306322	0.546404	1.10183	caf20∆	WT
YLR292C	2	1	17.9	0.306634	0.546462	2.4198	WT	caf20∆
YGR085C	10	7	440.94	0.307908	0.548234	1.09308	caf20∆	WT
YNR015W	5	1	59.37	0.309605	0.550754	1.2908	WT	caf20∆
YOR272W	8	7	168.38	0.310273	0.5508	1.20951	WT	caf20∆
YDR424C	5	2	76.28	0.310462	0.5508	1.13074	WT	caf20∆
YDR469W	2	1	74.36	0.310477	0.5508	1.10674	WT	caf20∆
YPR190C	4	2	70.42	0.311057	0.550977	1.28127	WT	caf20∆
YIL027C	4	3	91.46	0.31114	0.550977	1.26845	WT	caf20∆
YDR161W	4	2	63.79	0.311776	0.551603	1.1092	caf20∆	WT
YHR141C	5	3	148.02	0.312417	0.552238	1.078	caf20∆	WT
YPL135W	3	1	81.25	0.313031	0.552643	1.31211	caf20∆	WT
YLR208W	13	12	534.02	0.313212	0.552643	1.06811	WT	caf20∆
YGR048W	6	2	91.7	0.314559	0.553628	1.3591	WT	caf20∆
YLR287C	6	5	90.32	0.314624	0.553628	1.25558	WT	caf20∆
YCL026C-B	1	1	34.44	0.314703	0.553628	1.96901	WT	caf20∆
YDL201W	4	4	195.31	0.314902	0.553628	1.14434	WT	caf20∆
YMR221C	4	1	54.13	0.315697	0.554526	18.3946	caf20∆	WT
YHR170W	14	10	469.02	0.316697	0.555261	1.09978	WT	caf20∆
YBR137W	2	1	96.79	0.31672	0.555261	1.26325	caf20∆	WT
YDR153C	4	2	116.18	0.316967	0.555261	1.16446	WT	caf20∆
YMR243C	6	3	144.2	0.317272	0.555297	1.48925	WT	caf20∆
YMR002W	1	1	39.5	0.317909	0.555513	1.32743	caf20∆	WT
YMR304W	8	4	108	0.317964	0.555513	1.23356	caf20∆	WT
YJR014W	4	2	116.98	0.319273	0.557303	1.07382	WT	caf20∆
YKL152C	19	16	1026.12	0.319705	0.557395	1.08373	caf20∆	WT
YLR270W	13	9	402.04	0.320395	0.557395	1.05342	WT	caf20∆
YCR028C-A	5	2	248.07	0.320618	0.557395	1.13804	WT	caf20∆
YLR354C	20	15	1367.96	0.321303	0.557395	1.05892	caf20∆	WT
YHR060W	5	2	87.48	0.321577	0.557395	1.40687	WT	caf20∆
YMR079W	15	14	559.4	0.321909	0.557395	1.0907	caf20∆	WT
YOR271C	4	3	119.81	0.322267	0.557395	1.3539	caf20∆	WT
YJL173C	2	2	114.9	0.322462	0.557395	1.08287	caf20∆	WT
YHR113W	7	5	110.34	0.322495	0.557395	1.11058	WT	caf20∆
YOR002W	2	2	35.6	0.322624	0.557395	1.28464	caf20∆	WT
YOR116C	8	4	126.8	0.32264	0.557395	2.22381	WT	caf20∆
YMR291W	6	2	56.95	0.322748	0.557395	2.52594	WT	caf20∆
YDR427W	16	12	330.55	0.32356	0.557614	1.23973	WT	caf20∆
YFL005W	10	7	350.38	0.323762	0.557614	1.12805	WT	caf20∆
YIL034C	6	6	176.15	0.324043	0.557614	1.17094	caf20∆	WT
YNL153C	5	3	188.51	0.324259	0.557614	1.09877	WT	caf20∆
YNL079C	18	15	958.78	0.324452	0.557614	1.11629	WT	caf20∆
YNL246W	1	1	29.79	0.324586	0.557614	1.40926	caf20∆	WT
YIL041W	16	14	718.55	0.326116	0.559751	1.11262	caf20∆	WT
YBL045C	18	15	563.91	0.326735	0.560322	1.19135	WT	caf20∆
YDR321W	8	8	286.89	0.328153	0.56226	1.05512	WT	caf20∆
YPR125W	13	2	97.16	0.328934	0.563105	1.04554	WT	caf20∆
YJR074W	2	2	102.89	0.329361	0.563342	1.14525	WT	caf20∆
YNL099C	1	1	31.1	0.329917	0.563801	1.42669	WT	caf20∆
YGL097W	3	3	62.63	0.330286	0.563938	1.22159	WT	caf20∆
YDL205C	6	3	94.09	0.330603	0.563986	1.13621	caf20∆	WT
YGR087C	9	2	746.01	0.331418	0.564883	1.18362	WT	caf20∆
YLR447C	11	11	404.93	0.331874	0.565169	1.13507	WT	caf20∆
YML079W	4	3	130.95	0.333213	0.566955	1.17453	WT	caf20∆
YFR032C-A	2	1	19.88	0.334259	0.56819	2.02479	WT	caf20∆
YBR068C	4	2	79.17	0.334835	0.56819	1.1714	WT	caf20∆
YIL038C	9	2	76.5	0.335045	0.56819	1.11231	caf20∆	WT
YKL197C	7	1	44.56	0.335101	0.56819	5.93613	caf20∆	WT
YHR021C	5	5	278.91	0.3362	0.569278	1.11441	caf20∆	WT
YPL086C	9	6	191.22	0.336364	0.569278	1.08301	caf20∆	WT
YOR326W	25	14	646.19	0.336674	0.569278	1.71536	caf20∆	WT
YBR261C	3	1	22.05	0.33693	0.569278	1.1757	caf20∆	WT
YKL190W	3	2	55.56	0.337199	0.569278	1.08817	caf20∆	WT
YLR249W	66	47	3683.35	0.338956	0.571413	1.12381	caf20∆	WT
YHR132C	3	2	68.37	0.33927	0.571413	1.14953	WT	caf20∆
YJR103W	11	6	177.82	0.33934	0.571413	1.12219	WT	caf20∆
YBR156C	7	1	52.26	0.34005	0.571643	10.776	WT	caf20∆
YGL202W	23	20	1393.69	0.340062	0.571643	1.06272	WT	caf20∆
YIL039W	1	1	16.68	0.340901	0.572286	4.92453	WT	caf20∆
YOR286W	6	2	129.32	0.341087	0.572286	1.17236	WT	caf20∆
YMR307W	8	8	529.44	0.341322	0.572286	1.08382	WT	caf20∆
YJR057W	3	1	34.98	0.342425	0.573642	1.30517	caf20∆	WT
YPL249C-A	10	2	496.15	0.343397	0.574778	1.17485	WT	caf20∆
YPL127C	8	5	155.03	0.345177	0.576887	1.12055	WT	caf20∆
YGL076C	21	1	1074.63	0.345247	0.576887	1.27054	caf20∆	WT
YMR298W	2	1	24.94	0.346593	0.578055	Inf	WT	caf20∆
YMR047C	2	1	57.56	0.346593	0.578055	Inf	WT	caf20∆
YDR189W	7	1	111.78	0.346833	0.578055	1.43628	WT	caf20∆
YEL020W-A	3	3	131.78	0.348744	0.580496	1.23832	WT	caf20∆
YHR098C	7	5	180.64	0.349068	0.580496	1.36384	caf20∆	WT
YNL200C	4	3	113.69	0.349188	0.580496	1.18932	WT	caf20∆
YBR172C	6	2	110.26	0.350679	0.58202	1.38083	WT	caf20∆
YKL164C	4	1	104.09	0.350983	0.58202	1.24854	caf20∆	WT
YKL069W	4	2	54.42	0.350998	0.58202	1.12581	caf20∆	WT
YBR205W	7	4	98.49	0.351414	0.582067	1.23075	WT	caf20∆
YDL128W	1	1	69.88	0.351622	0.582067	1.46182	caf20∆	WT
YOL030W	4	4	150.1	0.352743	0.583429	1.67939	WT	caf20∆
YFL037W	13	12	514.41	0.354087	0.585156	1.1622	caf20∆	WT
YKL014C	19	6	191.44	0.35473	0.585724	1.1874	WT	caf20∆
YDR365C	7	4	109.31	0.356124	0.587129	1.16901	WT	caf20∆
YJR132W	5	4	155.14	0.356182	0.587129	1.14457	WT	caf20∆
YLR268W	2	1	43.81	0.358206	0.589691	1.29906	caf20∆	WT
YLR449W	4	2	97.31	0.358339	0.589691	1.15079	WT	caf20∆
YKR074W	4	1	78.18	0.359197	0.590585	1.49149	caf20∆	WT
YPL235W	9	6	297.93	0.359486	0.590585	1.18525	caf20∆	WT
YMR264W	4	4	146.31	0.361384	0.593204	1.46998	WT	caf20∆
YDR372C	8	6	209.87	0.362167	0.593865	1.1164	caf20∆	WT
YOR176W	9	5	173.04	0.362394	0.593865	1.24581	WT	caf20∆
YMR011W	3	2	61.19	0.363187	0.594666	1.11781	caf20∆	WT
YML012W	5	4	191.53	0.363678	0.594972	1.33342	caf20∆	WT
YFR021W	3	1	39.02	0.364706	0.596154	1.11768	WT	caf20∆
YDR429C	10	8	427.81	0.365266	0.59657	1.14451	WT	caf20∆
YGL031C	11	3	509.47	0.365737	0.596842	1.06523	caf20∆	WT
YPL169C	4	1	62.92	0.367493	0.599206	3.17139	WT	caf20∆
YPR159W	6	5	216.04	0.369276	0.601613	1.16153	caf20∆	WT
YMR142C	10	1	499.81	0.370005	0.602298	2.00284	caf20∆	WT
YGL049C	10	3	213.55	0.372419	0.605462	1.17011	WT	caf20∆
YDR533C	9	8	335.35	0.372568	0.605462	1.07523	caf20∆	WT
YBL092W	8	5	358.83	0.373062	0.605761	1.16846	WT	caf20∆
YAL035W	36	19	1151.08	0.373384	0.605781	1.06754	WT	caf20∆
YDR496C	12	7	178.43	0.37378	0.605921	1.14312	WT	caf20∆
YMR140W	2	1	16.26	0.374146	0.606012	1.79013	caf20∆	WT
YIL063C	9	5	180.1	0.375039	0.606955	1.0788	WT	caf20∆
YPL262W	17	12	622.37	0.375841	0.607354	1.12856	caf20∆	WT
YPR103W	8	7	272.7	0.375907	0.607354	1.09915	WT	caf20∆
YDR317W	3	1	30.42	0.376544	0.607676	1.36483	WT	caf20∆
YLR048W	13	3	695.8	0.37674	0.607676	1.23359	caf20∆	WT
YPL274W	1	1	26.5	0.377039	0.607676	1.51008	caf20∆	WT
YLR433C	4	3	39.09	0.378231	0.609096	1.13074	WT	caf20∆
YNR052C	2	1	71.13	0.379691	0.610943	1.49578	WT	caf20∆
YDR328C	8	6	249.81	0.38229	0.614619	1.21071	caf20∆	WT
YHR135C	2	2	75.72	0.384914	0.617278	1.03711	WT	caf20∆
YBL026W	2	2	116.14	0.385165	0.617278	1.13662	WT	caf20∆
YGL087C	3	2	106.85	0.385887	0.617278	1.08243	caf20∆	WT
YLL023C	1	1	46.95	0.38592	0.617278	1.38431	WT	caf20∆
YHR023W	18	4	176.48	0.385954	0.617278	1.18071	caf20∆	WT
YDL237W	1	1	17.25	0.386094	0.617278	2.7972	WT	caf20∆
YJR109C	60	47	3097.2	0.386193	0.617278	1.09684	WT	caf20∆
YJR135W-A	4	2	128.62	0.386742	0.617278	1.09563	WT	caf20∆
YAL021C	7	2	53.93	0.386785	0.617278	1.17474	WT	caf20∆
YNL216W	7	5	130.2	0.387704	0.618239	1.16457	caf20∆	WT
YMR220W	7	4	210.79	0.388276	0.618249	1.08545	WT	caf20∆
YPR085C	3	1	28.83	0.388343	0.618249	1.36439	caf20∆	WT
YGR074W	2	2	55.57	0.389333	0.619321	1.20366	WT	caf20∆
YBR109C	8	7	573.99	0.390174	0.620154	1.10747	caf20∆	WT
YKR038C	4	2	40.87	0.39148	0.621724	1.18406	WT	caf20∆
YMR197C	4	2	146.38	0.394047	0.625074	1.29553	WT	caf20∆
YDR293C	15	12	371.47	0.394228	0.625074	1.17332	caf20∆	WT
YOR259C	8	7	288.11	0.395395	0.626298	1.06959	WT	caf20∆
YDL143W	18	12	431.6	0.396716	0.626298	1.1344	WT	caf20∆
YPL218W	7	7	361.99	0.396829	0.626298	1.16276	caf20∆	WT
YPL178W	5	2	97.66	0.397162	0.626298	1.16237	caf20∆	WT
YNL131W	5	4	218.87	0.397208	0.626298	1.23225	caf20∆	WT
YGL200C	4	4	127.75	0.39737	0.626298	1.24047	WT	caf20∆
YNL206C	4	2	26.37	0.397483	0.626298	1.37771	WT	caf20∆
YLR347C	7	6	174.63	0.397563	0.626298	1.10973	WT	caf20∆
YCR075W-A	2	1	25.24	0.398634	0.627479	1.26477	WT	caf20∆
YDR011W	13	8	200.56	0.401005	0.630704	1.33702	WT	caf20∆
YOR261C	8	6	198.64	0.402092	0.631905	1.11729	caf20∆	WT
YDL099W	5	1	46.14	0.403981	0.634364	1.15785	caf20∆	WT
YDR404C	4	2	73.38	0.405018	0.635482	1.20105	WT	caf20∆
YKL120W	13	9	435.21	0.407008	0.638091	1.14627	caf20∆	WT
YER021W	14	9	429.85	0.407824	0.638859	1.06591	caf20∆	WT
YPL131W	20	15	1006.13	0.408735	0.639773	1.16339	caf20∆	WT
YBL024W	27	22	752.49	0.409436	0.640357	1.0653	caf20∆	WT
YHR008C	10	7	311.43	0.410296	0.641189	1.14385	caf20∆	WT
YLR038C	1	1	22.54	0.411651	0.64237	1.1058	WT	caf20∆
YOR281C	4	2	150.96	0.411708	0.64237	1.27842	WT	caf20∆
YOR020W-A	2	2	63.89	0.413592	0.644795	1.44101	caf20∆	WT
YFR002W	8	3	132.58	0.414206	0.645238	1.30999	WT	caf20∆
YFR009W	17	12	455.58	0.415289	0.646409	1.10625	caf20∆	WT
YBR159W	6	3	148.49	0.416754	0.648002	1.50275	caf20∆	WT
YGL181W	3	1	62.96	0.416975	0.648002	1.21864	caf20∆	WT
YKL007W	9	7	229.24	0.418332	0.648847	1.20532	WT	caf20∆
YOR224C	5	4	225.83	0.418335	0.648847	1.23472	WT	caf20∆
YHL033C	25	5	1426.61	0.418515	0.648847	1.05465	caf20∆	WT
YOR039W	4	3	90.38	0.420029	0.65066	1.32042	WT	caf20∆
YCR005C	9	8	280.3	0.421111	0.65066	1.15848	caf20∆	WT
YBR106W	6	4	129.74	0.421257	0.65066	1.16233	WT	caf20∆
YDR188W	18	13	816.68	0.421533	0.65066	1.10682	caf20∆	WT
YGR193C	9	3	126.06	0.421891	0.65066	1.51526	caf20∆	WT
YBR094W	4	1	51.43	0.422161	0.65066	1.10701	WT	caf20∆
YDR511W	2	1	21.66	0.422324	0.65066	1.49665	WT	caf20∆
YBL098W	5	1	44.51	0.422347	0.65066	1.3663	WT	caf20∆
YJL177W	12	1	844.62	0.42317	0.651415	1.12746	WT	caf20∆
YMR091C	2	2	53.07	0.425152	0.653952	7.017	caf20∆	WT
YFL022C	22	17	1152.56	0.425726	0.654319	1.05035	WT	caf20∆
YDL174C	6	4	119.16	0.426143	0.654446	2.23529	WT	caf20∆
YOR335C	52	39	2279.08	0.426982	0.654718	1.05247	WT	caf20∆
YHR088W	3	2	48.15	0.42699	0.654718	1.09341	WT	caf20∆
YER151C	13	5	244.72	0.427955	0.655684	1.10907	WT	caf20∆
YOL127W	11	9	396.74	0.429986	0.657881	1.08129	WT	caf20∆
YMR027W	18	10	518.66	0.430062	0.657881	1.09482	WT	caf20∆
YDR098C;YER174C	7	6	207.44	0.430422	0.657917	1.09925	caf20∆	WT
YHR039C	8	7	156.69	0.43116	0.65853	1.21531	caf20∆	WT
YMR153W	3	2	35.36	0.432582	0.660185	1.26104	WT	caf20∆
YLR147C	3	1	33.43	0.433386	0.660722	1.14929	WT	caf20∆
YJR063W	3	2	122.55	0.433609	0.660722	1.25274	caf20∆	WT
YGL014W	4	2	38.31	0.434069	0.660907	1.16898	WT	caf20∆
YLR325C	5	3	273.77	0.434513	0.661068	1.06713	WT	caf20∆
YBL027W	12	10	678.09	0.435088	0.661428	1.07266	WT	caf20∆
YOR027W	29	25	1215.08	0.436455	0.662991	1.06232	caf20∆	WT
YOR196C	2	1	36.27	0.437545	0.664131	2.26712	WT	caf20∆
YBR221C	9	8	450.65	0.440664	0.667743	1.40731	caf20∆	WT
YOR220W	5	3	151.16	0.440881	0.667743	1.08079	caf20∆	WT
YLR253W	4	1	25.97	0.44095	0.667743	1.16802	caf20∆	WT
YDL051W	8	5	316.51	0.44204	0.668877	1.06929	WT	caf20∆
YGL027C	10	6	192.34	0.442634	0.669258	1.23344	caf20∆	WT
YER026C	2	2	107.48	0.443916	0.670677	1.66881	caf20∆	WT
YHR193C	11	11	509.54	0.445003	0.671799	1.06353	caf20∆	WT
YBR272C	7	2	56.82	0.446228	0.673129	1.00882	caf20∆	WT
YLR185W	5	4	200.47	0.446924	0.673474	1.20525	caf20∆	WT
YKL172W	9	5	256.41	0.447149	0.673474	1.05769	caf20∆	WT
YLR387C	6	3	29.44	0.44749	0.673474	1.13124	WT	caf20∆
YNL316C	3	2	62.89	0.448267	0.674124	1.00329	WT	caf20∆
YGL120C	12	10	176.04	0.448739	0.674316	1.08977	WT	caf20∆
YGR187C	3	1	90.03	0.450106	0.675381	1.17213	caf20∆	WT
YMR309C	17	11	777.28	0.450168	0.675381	1.04566	WT	caf20∆
YLR008C	4	2	103.3	0.450639	0.675381	1.77136	caf20∆	WT
YDR406W	8	2	123.95	0.450829	0.675381	1.19192	WT	caf20∆
YGL008C	42	10	2113.58	0.451879	0.676434	1.31556	WT	caf20∆
YHR076W	6	3	71.52	0.453588	0.678473	1.14603	WT	caf20∆
YHR196W	2	1	131.5	0.454037	0.678626	1.02415	WT	caf20∆
YJR007W	19	13	500.25	0.454794	0.679237	1.07876	caf20∆	WT
YPL160W	48	44	2010.61	0.456535	0.681318	1.03372	WT	caf20∆
YOR099W	5	4	168.55	0.45765	0.682453	1.18693	WT	caf20∆
YCR053W	34	27	1599.33	0.457994	0.682453	1.07177	WT	caf20∆
YOL038W	8	6	282.21	0.460143	0.685134	1.0745	caf20∆	WT
YML106W;YMR271C	11	7	623.26	0.460995	0.685879	1.03495	caf20∆	WT
YML117W	9	1	66.64	0.461458	0.686046	2.07481	caf20∆	WT
YGR210C	9	7	216.96	0.46227	0.68673	1.6917	caf20∆	WT
YOR327C	3	2	48.96	0.464388	0.689354	1.14514	caf20∆	WT
YDL060W	4	4	102.18	0.464975	0.689633	1.10857	caf20∆	WT
YGR005C	4	1	50.18	0.465282	0.689633	1.12365	WT	caf20∆
YMR306W	10	5	89.86	0.466954	0.691588	1.20083	WT	caf20∆
YMR272C	5	3	53.46	0.468378	0.693171	1.12865	WT	caf20∆
YOR211C	11	3	76.11	0.469268	0.693963	1.26235	caf20∆	WT
YGL105W	14	13	658.42	0.471591	0.69687	1.09428	caf20∆	WT
YGR145W	6	2	100.7	0.473631	0.699357	1.11701	WT	caf20∆
YFR047C	4	2	140.47	0.474289	0.699731	1.07363	WT	caf20∆
YLR179C	9	6	405.43	0.4746	0.699731	1.05997	WT	caf20∆
YNL064C	14	14	616.44	0.475146	0.700008	1.07799	caf20∆	WT
YBL020W	2	2	51.25	0.47633	0.701224	1.47067	WT	caf20∆
YKL016C	4	4	163.46	0.478358	0.703043	1.17108	caf20∆	WT
YER049W	14	9	370.14	0.478525	0.703043	1.22208	caf20∆	WT
YDR074W	20	16	673.68	0.478644	0.703043	1.06402	caf20∆	WT
YMR290C	8	6	231.08	0.480066	0.704601	1.08146	WT	caf20∆
YLR074C	1	1	44.2	0.481218	0.705538	1.14984	WT	caf20∆
YIL115C	15	9	236.04	0.481683	0.705538	1.14534	WT	caf20∆
YLR429W	18	14	552.34	0.481787	0.705538	1.07377	caf20∆	WT
YLR409C	8	4	127.75	0.483983	0.708224	1.08437	caf20∆	WT
YPR058W	7	4	184.47	0.484789	0.708511	1.11882	WT	caf20∆
YJL033W	6	3	109.42	0.484905	0.708511	1.25634	WT	caf20∆
YPR148C	9	8	258.38	0.48583	0.709333	1.05198	WT	caf20∆
YLR106C	54	28	1024.91	0.486646	0.709995	1.24276	WT	caf20∆
YEL026W	5	4	303.48	0.487415	0.710586	1.11096	caf20∆	WT
YLR457C	3	2	21.56	0.489195	0.712649	1.12405	caf20∆	WT
YDR170C	23	15	483.96	0.490137	0.713014	1.11621	caf20∆	WT
YGR173W	6	6	218.15	0.490445	0.713014	1.05264	WT	caf20∆
YHR089C	6	3	120.6	0.490539	0.713014	1.11972	WT	caf20∆
YPL240C	46	6	3119.81	0.491433	0.713782	1.12942	caf20∆	WT
YBR056W	7	3	167.73	0.494695	0.717246	1.11315	WT	caf20∆
YDL236W	6	5	182.91	0.49482	0.717246	1.08562	WT	caf20∆
YIL002C	4	1	43.33	0.495023	0.717246	5.90273	caf20∆	WT
YBR017C	3	1	107.06	0.495839	0.717246	1.09984	caf20∆	WT
YJL012C	6	4	139.81	0.495958	0.717246	1.2098	WT	caf20∆
YBR126C	18	14	643.62	0.496018	0.717246	1.05184	WT	caf20∆
YGR253C	9	8	360.87	0.497665	0.719094	1.07872	caf20∆	WT
YFL028C	3	3	71.74	0.499377	0.720721	1.10007	WT	caf20∆
YKL021C	8	2	121.21	0.500195	0.720721	1.11788	caf20∆	WT
YJR099W	2	1	21.08	0.500503	0.720721	1.81797	caf20∆	WT
YLR342W	36	17	1254.12	0.500526	0.720721	1.06449	WT	caf20∆
YGL167C	7	3	109.55	0.500945	0.720721	1.09161	caf20∆	WT
YOR254C	15	7	291.08	0.501002	0.720721	1.20487	WT	caf20∆
YCL043C	25	19	1411.02	0.502547	0.722267	1.11342	caf20∆	WT
YMR268C	5	1	35.71	0.503106	0.722267	1.42248	WT	caf20∆
YNL281W	4	4	239.61	0.503527	0.722267	1.0454	WT	caf20∆
YJR068W	8	2	116.78	0.503555	0.722267	1.12322	WT	caf20∆
YKR072C	4	1	50.09	0.504825	0.723558	9.19454	WT	caf20∆
YHR199C	3	1	40.6	0.505231	0.723609	2.99499	WT	caf20∆
YKL165C	3	3	40.94	0.506593	0.724776	1.20669	caf20∆	WT
YMR178W	7	4	212.58	0.506787	0.724776	1.08506	WT	caf20∆
YGR078C	4	1	94.1	0.507783	0.72538	1.14029	WT	caf20∆
YJL164C	2	1	57.51	0.507951	0.72538	1.35153	WT	caf20∆
YJR125C	3	3	53.97	0.508645	0.725841	1.10852	caf20∆	WT
YDR174W	6	4	184.22	0.509804	0.726931	1.23264	caf20∆	WT
YDL124W	18	16	701.86	0.510153	0.726931	1.06398	caf20∆	WT
YER080W	19	15	437.61	0.511786	0.728727	1.09825	WT	caf20∆
YBR003W	4	1	24.46	0.512545	0.729276	1.08979	caf20∆	WT
YHR005C	5	2	96.27	0.513194	0.729669	1.06224	caf20∆	WT
YKL193C	7	4	166.62	0.513985	0.729795	1.11789	caf20∆	WT
YKR039W	3	1	46.75	0.51403	0.729795	2.06877	WT	caf20∆
YGR266W	8	6	113.33	0.514481	0.729906	1.33171	caf20∆	WT
YHR019C	30	27	1495.68	0.515634	0.73064	1.03331	caf20∆	WT
YBL017C	18	9	327.35	0.515746	0.73064	1.06188	WT	caf20∆
YPL090C	17	14	895.03	0.516774	0.731551	1.05025	WT	caf20∆
YMR145C	10	4	132.62	0.517291	0.731551	1.97099	caf20∆	WT
YNL178W	24	18	1496.52	0.517511	0.731551	1.0803	caf20∆	WT
YML034W	6	2	60.73	0.517984	0.73169	2.94504	caf20∆	WT
YMR152W	5	3	45.02	0.518921	0.732484	1.18757	WT	caf20∆
YDR267C	3	3	45.34	0.519777	0.733163	1.08786	WT	caf20∆
YDL022W	9	7	667.35	0.52031	0.733245	1.0694	caf20∆	WT
YDR477W	8	3	96.4	0.520585	0.733245	1.08921	WT	caf20∆
YDR119W	2	1	42.22	0.523152	0.735576	4.97858	WT	caf20∆
YIL076W	7	5	212.85	0.523711	0.735576	1.0874	caf20∆	WT
YER165W	29	23	1473.94	0.523911	0.735576	1.06153	WT	caf20∆
YGR128C	9	5	244.9	0.523988	0.735576	1.09187	caf20∆	WT
YAL029C	8	1	112.67	0.524122	0.735576	1.61423	WT	caf20∆
YDR012W	19	2	1453.04	0.525788	0.737386	1.09469	caf20∆	WT
YPL111W	11	7	231.04	0.52766	0.739481	1.13336	caf20∆	WT
YBL050W	12	11	373.59	0.528303	0.739852	1.05478	WT	caf20∆
YAL049C	5	3	103.6	0.530469	0.742092	1.18366	caf20∆	WT
YER177W	20	5	1233.31	0.531483	0.742092	1.0483	WT	caf20∆
YJR009C	35	6	2131.41	0.531617	0.742092	1.28882	caf20∆	WT
YKL077W	4	3	25.07	0.531935	0.742092	1.14025	caf20∆	WT
YDL235C	8	6	263.13	0.532042	0.742092	1.17233	caf20∆	WT
YGR282C	8	6	439.5	0.53218	0.742092	1.25339	WT	caf20∆
YGL203C	5	4	45.47	0.532597	0.742144	1.36581	WT	caf20∆
YDL135C	5	5	181.69	0.534449	0.743824	1.05897	caf20∆	WT
YNL192W	2	1	38.16	0.534564	0.743824	1.9775	WT	caf20∆
YGR130C	23	13	553.41	0.535397	0.744331	1.1133	caf20∆	WT
YMR116C	21	19	1314.38	0.53569	0.744331	1.0625	caf20∆	WT
YJL214W	2	1	20.17	0.536665	0.745157	1.1861	caf20∆	WT
YPR163C	26	24	876.8	0.538007	0.746022	1.0803	caf20∆	WT
YKL214C	1	1	64.91	0.53862	0.746022	1.12713	WT	caf20∆
Q0250	3	2	53.23	0.539153	0.746022	1.15744	caf20∆	WT
YMR311C	7	7	65.62	0.539329	0.746022	1.09286	caf20∆	WT
YBR082C	5	3	114.73	0.539396	0.746022	1.11184	WT	caf20∆
YIL070C	4	3	111.74	0.539578	0.746022	1.05503	WT	caf20∆
YGR136W	2	2	90.99	0.541268	0.74751	1.12675	caf20∆	WT
YKL180W	12	1	851	0.541485	0.74751	1.05676	caf20∆	WT
YLR448W	16	2	718.97	0.541801	0.74751	1.0583	WT	caf20∆
YJR096W	6	4	141.1	0.543197	0.748907	1.17053	WT	caf20∆
YIR022W	4	4	150.43	0.543703	0.749076	1.06966	caf20∆	WT
YFR028C	2	1	60.63	0.545763	0.750639	1.05278	WT	caf20∆
YDL168W	8	7	308.6	0.545877	0.750639	1.07485	caf20∆	WT
YDL025C	5	1	91.58	0.545989	0.750639	1.45391	WT	caf20∆
YNL292W	2	2	64.92	0.550622	0.756477	1.26265	caf20∆	WT
YDR529C	3	2	121.97	0.552378	0.75826	1.14648	WT	caf20∆
YDL188C	8	7	215.66	0.552696	0.75826	1.10299	WT	caf20∆
YMR146C	14	13	728.16	0.553499	0.758829	1.06001	caf20∆	WT
YPL211W	2	1	23.95	0.555176	0.76004	1.11822	WT	caf20∆
YEL013W	9	5	241.68	0.55525	0.76004	1.45885	WT	caf20∆
YML073C	18	4	811.86	0.555548	0.76004	1.07191	caf20∆	WT
YHR121W	4	4	215.27	0.556863	0.761306	1.13695	caf20∆	WT
YBL072C	11	10	685.07	0.558316	0.762057	1.05373	caf20∆	WT
YGR207C	13	10	390.55	0.559079	0.762057	1.11122	caf20∆	WT
YDR214W	15	12	444.56	0.559164	0.762057	1.04579	WT	caf20∆
YBR291C	4	1	68.37	0.559383	0.762057	1.0389	caf20∆	WT
YGR124W	30	19	1307.22	0.560128	0.762057	1.09735	caf20∆	WT
YHR128W	9	5	331.03	0.560247	0.762057	1.06058	caf20∆	WT
YLR093C	1	1	19.42	0.560491	0.762057	2.98312	WT	caf20∆
YBR245C	18	6	205.42	0.560531	0.762057	1.09522	WT	caf20∆
YLL001W	13	11	333.6	0.563081	0.76467	1.04442	WT	caf20∆
YOR089C	4	3	127.91	0.563578	0.76467	1.04444	WT	caf20∆
YLR088W	4	4	101.55	0.563626	0.76467	1.05702	WT	caf20∆
YPR062W	6	6	270.93	0.564341	0.765109	1.06406	caf20∆	WT
YLR257W	8	8	210.66	0.56521	0.765756	1.09459	WT	caf20∆
YER178W	24	18	798.4	0.566183	0.766543	1.24761	caf20∆	WT
YBR025C	28	21	1260.88	0.568097	0.768602	1.04357	WT	caf20∆
YER001W	2	1	30.55	0.570711	0.77114	1.18234	WT	caf20∆
YDR213W	9	3	45.13	0.570762	0.77114	1.08585	WT	caf20∆
YGR135W	10	7	489.72	0.57133	0.771375	1.06518	caf20∆	WT
YDR064W	11	10	596.26	0.57301	0.773109	1.06628	WT	caf20∆
YLR348C	8	4	198.52	0.573997	0.773587	1.12473	caf20∆	WT
YJL145W	10	7	133.02	0.5745	0.773587	1.04817	WT	caf20∆
YMR109W	20	11	414.1	0.574552	0.773587	1.05116	caf20∆	WT
YPL208W	4	2	48.47	0.575854	0.774807	1.11428	WT	caf20∆
YPL085W	16	9	183.5	0.576978	0.775786	1.16058	WT	caf20∆
YCL025C	5	1	38.85	0.577924	0.776523	1.60134	caf20∆	WT
YML131W	4	3	55.29	0.58068	0.77969	1.0681	WT	caf20∆
YFR016C	12	5	151.36	0.582292	0.780393	1.14469	caf20∆	WT
YGR279C	8	4	352.55	0.582594	0.780393	1.04028	WT	caf20∆
YCL054W	15	7	158.78	0.58347	0.780393	1.15599	caf20∆	WT
YOR168W	40	28	1444.23	0.583561	0.780393	1.04349	caf20∆	WT
YAL003W	17	13	849.4	0.583773	0.780393	1.13534	WT	caf20∆
YML069W	14	8	385.7	0.584059	0.780393	1.19584	caf20∆	WT
YOR048C	5	2	38.21	0.584487	0.780393	1.08621	WT	caf20∆
YPR088C	7	3	130.68	0.584792	0.780393	1.32337	WT	caf20∆
YER063W	6	3	228.81	0.584796	0.780393	1.04838	caf20∆	WT
YKL151C	4	2	65.25	0.586012	0.780992	1.16129	caf20∆	WT
YPR187W	2	2	48.83	0.586364	0.780992	1.04612	caf20∆	WT
YMR315W	13	9	540.6	0.586443	0.780992	1.02787	caf20∆	WT
YGL115W	8	6	194.43	0.587803	0.782053	1.08533	WT	caf20∆
YEL051W	9	7	177.55	0.588383	0.782053	1.3216	caf20∆	WT
YPL273W;YMR321C	12	8	431.17	0.58844	0.782053	1.0761	WT	caf20∆
YFR037C	14	5	401.89	0.588916	0.782154	1.36533	caf20∆	WT
YGR054W	14	12	374.35	0.589661	0.782612	1.04996	WT	caf20∆
YBR101C	8	6	137.28	0.592597	0.785552	1.09567	WT	caf20∆
YDL136W	10	6	742.34	0.59268	0.785552	1.06915	caf20∆	WT
YLR330W	14	12	462.15	0.595743	0.789077	1.07207	caf20∆	WT
YOL100W	10	2	79.33	0.596971	0.790169	1.06423	WT	caf20∆
YKL184W	7	2	51.27	0.601145	0.794914	1.19116	caf20∆	WT
YIL062C	4	3	151.05	0.601599	0.794914	1.13193	caf20∆	WT
YER105C	11	4	124.06	0.601776	0.794914	1.57725	caf20∆	WT
YPR010C	29	22	979.11	0.603639	0.796836	1.0695	WT	caf20∆
YLR028C	23	13	1082.24	0.605495	0.798747	1.04121	caf20∆	WT
YAL007C	4	1	37.28	0.6068	0.799929	1.13477	caf20∆	WT
YJR053W	5	3	38.56	0.607922	0.800868	1.04672	WT	caf20∆
YBR162C	6	5	205.51	0.609016	0.801769	1.09968	WT	caf20∆
YCR004C	8	5	267.97	0.610592	0.803303	1.08575	caf20∆	WT
YLL040C	23	8	253.53	0.613044	0.8052	1.39904	WT	caf20∆
YOR280C	3	2	108.72	0.613843	0.8052	1.20843	caf20∆	WT
YPR034W	6	1	73.37	0.614038	0.8052	1.29973	caf20∆	WT
YKL085W	17	14	776.47	0.614089	0.8052	1.05694	WT	caf20∆
YGL048C	15	9	452.87	0.614094	0.8052	1.04181	WT	caf20∆
YEL071W	32	25	1467.26	0.61488	0.805691	1.04649	caf20∆	WT
YDL109C	4	2	27.78	0.617423	0.808481	1.37101	WT	caf20∆
YKL008C	2	1	44.58	0.61841	0.809231	1.09523	WT	caf20∆
YBR171W	2	2	33.17	0.619092	0.809582	1.44282	caf20∆	WT
YDR363W-A	1	1	60.43	0.620589	0.810049	1.3065	caf20∆	WT
YLR069C	9	4	39.75	0.620806	0.810049	1.10937	caf20∆	WT
YER057C	7	5	275.4	0.621793	0.810049	1.06522	WT	caf20∆
YHR028C	5	1	41.85	0.622089	0.810049	1.1367	caf20∆	WT
YJL189W	2	2	90.8	0.622364	0.810049	1.08389	WT	caf20∆
YCL037C	9	8	405.13	0.622381	0.810049	1.04183	WT	caf20∆
YJR065C	19	15	506.18	0.62253	0.810049	1.03844	WT	caf20∆
YGR060W	1	1	45.1	0.622764	0.810049	1.20768	WT	caf20∆
YOL120C	9	3	463.28	0.623425	0.810242	1.04151	WT	caf20∆
YDR486C	4	3	66.56	0.623742	0.810242	1.07847	WT	caf20∆
YBR176W	2	1	15.54	0.624774	0.811045	1.13627	WT	caf20∆
YOR131C	5	2	31.47	0.625277	0.811158	1.15032	WT	caf20∆
YGR008C	4	2	87.63	0.627091	0.812973	1.19992	WT	caf20∆
YJL179W	7	4	84.94	0.627695	0.813209	1.04011	WT	caf20∆
YML100W	23	19	573.02	0.628217	0.813209	1.03553	WT	caf20∆
YIL155C	8	4	134.86	0.628776	0.813209	1.0959	caf20∆	WT
YOL113W	5	3	32.49	0.628937	0.813209	1.07666	WT	caf20∆
YOR241W	6	1	59.4	0.629518	0.813293	1.4592	WT	caf20∆
YPR133C	9	5	227.05	0.629834	0.813293	1.08513	WT	caf20∆
YKR056W	6	2	80.95	0.631011	0.814275	1.1385	caf20∆	WT
YLL034C	9	6	68.36	0.63295	0.815938	1.25855	caf20∆	WT
YBR279W	7	4	71.26	0.633135	0.815938	1.24227	WT	caf20∆
YNL239W	14	8	572.69	0.636685	0.819815	1.03043	caf20∆	WT
YMR158W	3	2	30.72	0.636982	0.819815	1.04436	caf20∆	WT
YMR242C	17	14	871.88	0.638214	0.82086	1.04043	WT	caf20∆
YPL210C	12	8	379.07	0.639144	0.821516	1.03451	caf20∆	WT
YIL033C	10	8	205.64	0.642187	0.824435	1.0451	caf20∆	WT
YIL018W	17	14	786.17	0.642258	0.824435	1.05398	caf20∆	WT
YHR042W	21	14	734.21	0.643902	0.825789	1.09969	WT	caf20∆
YER056C	3	3	191.55	0.644158	0.825789	1.00101	caf20∆	WT
YJL115W	3	3	82.69	0.644768	0.825924	1.09093	caf20∆	WT
YLL011W	9	2	147.33	0.645297	0.825924	1.93641	WT	caf20∆
YDL208W	4	3	86.03	0.64553	0.825924	1.24306	caf20∆	WT
YHL038C	2	2	18.3	0.648224	0.827832	1.06165	WT	caf20∆
YLR231C	7	6	128.05	0.648617	0.827832	1.03302	WT	caf20∆
YJR010W	13	11	268.54	0.649421	0.827832	1.04137	caf20∆	WT
YOL052C	4	4	76.75	0.649505	0.827832	1.05763	caf20∆	WT
YLR372W	2	1	81.64	0.649558	0.827832	1.72228	caf20∆	WT
YJL002C	6	6	143.69	0.649563	0.827832	1.16439	caf20∆	WT
YDL110C	6	4	283.48	0.6508	0.828869	1.04478	caf20∆	WT
YCR081C-A	2	2	16.17	0.652817	0.830667	1.10261	caf20∆	WT
YIL114C	2	1	21.46	0.653061	0.830667	1.23159	caf20∆	WT
YLR075W	19	15	899.67	0.654099	0.831446	1.07648	caf20∆	WT
YDR037W	30	26	1499.85	0.654726	0.831701	1.02401	WT	caf20∆
YIR004W	5	1	84.04	0.657682	0.834915	1.34873	caf20∆	WT
YOR151C	18	12	323.87	0.660007	0.837309	1.08783	caf20∆	WT
YNR021W	8	4	165.7	0.660425	0.837309	1.05087	WT	caf20∆
YLR163C	3	2	47.02	0.661884	0.837653	1.04508	WT	caf20∆
YBR269C	3	3	85.79	0.663072	0.837653	1.0399	caf20∆	WT
YKR002W	5	1	43.63	0.664111	0.837653	1.05447	WT	caf20∆
YHR216W	15	2	899.2	0.664246	0.837653	1.08776	caf20∆	WT
YNL049C	3	1	71.67	0.664639	0.837653	1.70038	WT	caf20∆
YPR188C	3	3	67.4	0.664782	0.837653	1.08386	caf20∆	WT
YJL121C	7	6	207.14	0.664867	0.837653	1.08452	caf20∆	WT
YPL050C	7	2	139.18	0.66487	0.837653	1.01642	caf20∆	WT
YLR150W	14	11	753.21	0.665197	0.837653	1.06702	caf20∆	WT
YDR395W	11	7	323.15	0.665292	0.837653	1.25423	caf20∆	WT
YNL141W	9	7	293.95	0.66578	0.837653	1.03567	WT	caf20∆
YBR208C	22	13	384.3	0.665838	0.837653	1.0189	WT	caf20∆
YML056C	15	3	938.2	0.66632	0.837721	1.05142	caf20∆	WT
YOR243C	12	8	359.21	0.668211	0.83935	1.06687	caf20∆	WT
YLR206W	4	1	70.64	0.668475	0.83935	1.03003	caf20∆	WT
YGR132C	8	4	146.62	0.669378	0.839709	1.3208	WT	caf20∆
YMR131C	9	7	287.8	0.669829	0.839709	1.03405	WT	caf20∆
YGR211W	15	10	526.77	0.670049	0.839709	1.04718	caf20∆	WT
YKL144C	1	1	13.26	0.672395	0.842109	1.42503	WT	caf20∆
YJL008C	19	13	750.71	0.672868	0.842162	1.04415	caf20∆	WT
YER110C	29	26	1534.23	0.674866	0.844122	1.04902	caf20∆	WT
YLL029W	8	2	61.98	0.675566	0.844223	1.15013	caf20∆	WT
YDR507C	17	4	99.64	0.67581	0.844223	1.57544	WT	caf20∆
YPL232W	4	2	61.76	0.676498	0.844542	1.04002	WT	caf20∆
YLR195C	8	6	194.01	0.677154	0.844822	1.02985	caf20∆	WT
YMR015C	4	1	25.34	0.680244	0.848136	1.0247	caf20∆	WT
YMR196W	8	4	102.57	0.681386	0.848885	1.12443	caf20∆	WT
YNL075W	1	1	48.08	0.681713	0.848885	1.80025	WT	caf20∆
YNR053C	11	5	211.82	0.684083	0.851294	1.00854	WT	caf20∆
YKL143W	3	2	74.72	0.684982	0.85187	1.18715	caf20∆	WT
YNR046W	3	1	104.21	0.68658	0.853233	1.02054	WT	caf20∆
YNL219C	3	3	79.02	0.686951	0.853233	1.27443	caf20∆	WT
YCR093W	16	10	216.51	0.688	0.85369	1.10696	caf20∆	WT
YJL123C	10	6	453.1	0.688192	0.85369	1.03479	caf20∆	WT
YGL077C	1	1	63.09	0.688878	0.854	4.31774	WT	caf20∆
YGR118W	11	10	362.75	0.690595	0.855585	1.02792	WT	caf20∆
YDR517W	4	3	60.1	0.691759	0.856485	1.05483	caf20∆	WT
YML030W	2	1	33.13	0.694263	0.859041	7.19945	WT	caf20∆
YMR049C	7	7	272.24	0.695872	0.859935	1.09441	caf20∆	WT
YOR328W	8	2	172.63	0.696318	0.859935	1.01493	WT	caf20∆
YER029C	3	2	36.72	0.696426	0.859935	1.05212	WT	caf20∆
YMR170C	7	3	234.44	0.696745	0.859935	1.13785	caf20∆	WT
YBL055C	2	1	35.25	0.699475	0.862367	1.12082	WT	caf20∆
YGR277C	5	4	90.56	0.699598	0.862367	1.09293	WT	caf20∆
YOL061W	10	8	302.85	0.70013	0.86248	1.02695	WT	caf20∆
YNL265C	4	1	63.65	0.700955	0.862952	1.05527	caf20∆	WT
YBR189W	15	1	772.63	0.701501	0.863081	1.02886	WT	caf20∆
YDR177W	5	5	126.59	0.702408	0.863623	1.15616	caf20∆	WT
YAL046C	2	2	48.99	0.70313	0.863623	1.17965	WT	caf20∆
YMR038C	8	5	300.41	0.703932	0.863623	1.0541	caf20∆	WT
YJR143C	4	4	107.78	0.703997	0.863623	1.21087	caf20∆	WT
YPL048W	19	11	781.26	0.704277	0.863623	1.05558	caf20∆	WT
YML024W	11	9	802.35	0.704593	0.863623	1.03326	caf20∆	WT
YDL178W	8	6	242.9	0.705805	0.864566	1.04146	caf20∆	WT
YDL213C	5	3	77.33	0.706459	0.864827	1.07557	WT	caf20∆
YOL095C	6	1	42.3	0.707184	0.865172	1.62234	WT	caf20∆
YNL271C	17	2	98.73	0.707654	0.865205	1.04206	caf20∆	WT
YKL179C	9	3	78.26	0.708745	0.865997	1.05197	WT	caf20∆
YGR244C	12	9	201.03	0.710905	0.867658	1.26075	caf20∆	WT
YLR274W	6	2	61.24	0.710991	0.867658	1.08506	WT	caf20∆
YKL215C	13	7	270.4	0.713594	0.869441	1.08268	caf20∆	WT
YHR094C	8	4	157.91	0.71372	0.869441	1.01758	WT	caf20∆
YPL023C	7	2	107.02	0.713787	0.869441	1.04085	WT	caf20∆
YHR065C	7	3	152.56	0.71708	0.872908	1.39257	caf20∆	WT
YOR122C	4	4	279.09	0.718204	0.873732	1.04806	WT	caf20∆
YBR252W	6	3	127.32	0.720245	0.87536	1.04188	caf20∆	WT
YDL047W	7	5	104.34	0.72046	0.87536	1.03861	WT	caf20∆
YPR129W	5	5	237.11	0.720885	0.87536	1.04346	caf20∆	WT
YER062C	16	4	563.3	0.722737	0.877065	1.05962	caf20∆	WT
YKR043C	10	8	561.67	0.723321	0.877229	1.07704	caf20∆	WT
YKL018W	1	1	25.04	0.724344	0.877925	1.39268	caf20∆	WT
YIL124W	6	5	195.28	0.726004	0.878519	1.07048	caf20∆	WT
YDL083C	11	8	559.21	0.72634	0.878519	1.035	caf20∆	WT
YPL020C	10	2	71.8	0.726647	0.878519	1.03076	WT	caf20∆
YHR122W	3	2	118.54	0.726948	0.878519	1.01923	WT	caf20∆
YPL260W	11	6	218.47	0.727081	0.878519	1.0169	WT	caf20∆
YBR218C	39	11	1606.77	0.727567	0.878563	1.02394	caf20∆	WT
YDL111C	4	2	87.5	0.729487	0.880338	1.32781	caf20∆	WT
YLL062C	4	3	82.17	0.730655	0.881203	1.15867	WT	caf20∆
YBR234C	14	7	304.42	0.731977	0.881473	1.06742	caf20∆	WT
YDL166C	3	2	89.06	0.731992	0.881473	1.22621	caf20∆	WT
YMR214W	5	1	91.79	0.732776	0.881473	1.16661	caf20∆	WT
YER042W	8	7	162.55	0.733088	0.881473	1.02226	WT	caf20∆
YPR143W	4	2	73.33	0.733133	0.881473	1.03234	WT	caf20∆
YOR321W	4	1	63.52	0.734021	0.881998	1.21943	caf20∆	WT
YGR175C	7	1	102.32	0.735341	0.882165	3.46621	WT	caf20∆
YER007C-A	6	4	204.41	0.735926	0.882165	1.03496	caf20∆	WT
YCR057C	3	1	77.34	0.735942	0.882165	1.3235	caf20∆	WT
YGL135W	13	11	729.27	0.735965	0.882165	1.02121	WT	caf20∆
YHR052W	7	3	217.83	0.736474	0.882235	1.03062	WT	caf20∆
YFL004W	12	7	96.56	0.737339	0.882281	1.04696	WT	caf20∆
YDL065C	3	1	30.18	0.737415	0.882281	1.15564	caf20∆	WT
YPR083W	5	2	25.65	0.738542	0.883001	1.30569	WT	caf20∆
YGL213C	3	2	69.38	0.740209	0.883001	1.06335	caf20∆	WT
YDL084W	25	19	1027.3	0.740476	0.883001	1.04198	caf20∆	WT
YPL110C	9	4	169.74	0.740643	0.883001	1.15119	WT	caf20∆
YFR050C	4	2	142.4	0.741354	0.883001	1.15532	caf20∆	WT
YHL015W	12	12	630.18	0.741603	0.883001	1.02578	WT	caf20∆
YGL201C	8	3	187.2	0.741607	0.883001	1.06283	WT	caf20∆
YDR211W	11	9	251.43	0.741631	0.883001	1.03009	WT	caf20∆
YAR007C	9	8	189.93	0.742223	0.883168	1.06086	caf20∆	WT
YNL059C	6	3	76.17	0.743235	0.883835	1.06339	WT	caf20∆
YOL094C	7	5	78.42	0.743864	0.884045	1.12515	WT	caf20∆
YDR525W-A	1	1	49.46	0.745553	0.885514	1.99719	WT	caf20∆
YCL044C	1	1	29.95	0.746942	0.886493	1.62568	caf20∆	WT
YHR091C	6	2	100.28	0.747284	0.886493	1.04373	WT	caf20∆
YDR388W	11	8	284.53	0.749214	0.888243	1.04927	caf20∆	WT
YPR033C	24	18	1132.43	0.749802	0.888355	1.01692	WT	caf20∆
YBL051C	4	2	64.09	0.750316	0.888355	1.10308	caf20∆	WT
YMR083W	13	7	436.56	0.751103	0.888355	1.01484	caf20∆	WT
YKL191W	6	3	94.65	0.752076	0.888355	1.30605	caf20∆	WT
YNL096C	18	7	648.36	0.752265	0.888355	1.02154	WT	caf20∆
YOR063W	34	25	1707.99	0.752385	0.888355	1.02283	WT	caf20∆
YIR026C	2	2	66.3	0.752489	0.888355	1.16769	WT	caf20∆
YOR160W	2	2	38.66	0.753673	0.888431	1.23837	caf20∆	WT
YKL053C-A	2	2	36.11	0.75382	0.888431	1.11059	caf20∆	WT
YJL186W	6	4	187.52	0.753916	0.888431	1.02649	caf20∆	WT
YFL059W	9	1	201.54	0.754686	0.888447	1.28572	caf20∆	WT
YPL237W	18	12	555.62	0.754839	0.888447	1.06582	caf20∆	WT
YHR025W	12	11	489.67	0.755592	0.888798	1.01868	WT	caf20∆
YPL063W	11	7	183.17	0.756621	0.889473	1.08717	caf20∆	WT
YDL097C	12	9	361.5	0.75871	0.890206	1.03146	caf20∆	WT
YEL056W	4	3	56.27	0.759796	0.890206	1.06625	WT	caf20∆
YCR002C	11	9	303.61	0.760027	0.890206	1.01343	WT	caf20∆
YDL103C	18	13	469.48	0.76026	0.890206	1.03337	caf20∆	WT
YNL108C	8	7	162.53	0.760457	0.890206	1.05052	caf20∆	WT
YBR026C	10	5	268.74	0.760742	0.890206	1.01605	WT	caf20∆
YKR059W	26	21	1897.25	0.760788	0.890206	1.02672	caf20∆	WT
YGL148W	14	12	580.43	0.761027	0.890206	1.01779	WT	caf20∆
YDL225W	8	5	175.97	0.761343	0.890206	1.10061	WT	caf20∆
YAL060W	6	4	115.45	0.763289	0.891948	1.07099	WT	caf20∆
YGL246C	3	2	135.56	0.764577	0.89292	1.15606	WT	caf20∆
YHL011C	14	12	478.64	0.766551	0.894251	1.0232	WT	caf20∆
YBR288C	4	2	97.18	0.76734	0.894251	1.00568	caf20∆	WT
YEL055C	13	10	208.52	0.767451	0.894251	1.0368	caf20∆	WT
YIL088C	3	1	59.96	0.768076	0.894251	1.97341	WT	caf20∆
YJR149W	4	1	39.03	0.768458	0.894251	1.01127	WT	caf20∆
YBR160W	6	4	111.09	0.768746	0.894251	1.02249	caf20∆	WT
YKL103C	11	9	347.45	0.768918	0.894251	1.01362	WT	caf20∆
YDR087C	6	3	55.33	0.771144	0.896306	1.01241	caf20∆	WT
YML125C	7	6	341.49	0.772315	0.896548	1.23431	caf20∆	WT
YDR001C	13	7	276.82	0.772503	0.896548	1.03203	caf20∆	WT
YDR071C	10	9	543.75	0.772728	0.896548	1.02413	WT	caf20∆
YNL323W	5	5	73.81	0.775484	0.899112	1.07405	WT	caf20∆
YDR361C	7	5	141.67	0.775857	0.899112	1.11976	caf20∆	WT
YDL195W	32	24	961.2	0.777261	0.900204	1.01236	WT	caf20∆
YOR298C-A	6	4	279.64	0.778995	0.901679	1.02245	WT	caf20∆
YDL144C	3	2	46.73	0.780103	0.902427	1.09107	caf20∆	WT
YPR072W	12	6	145.64	0.782011	0.903788	1.0763	caf20∆	WT
YDR036C	4	1	54.62	0.782205	0.903788	1.15775	caf20∆	WT
YGL231C	1	1	21.21	0.783754	0.904967	1.03038	caf20∆	WT
YMR110C	4	2	31.16	0.784322	0.904967	1.05865	caf20∆	WT
YML010W	20	15	535.76	0.784693	0.904967	1.0173	caf20∆	WT
YMR247C	12	7	204.91	0.785076	0.904967	1.01874	WT	caf20∆
YLR321C	3	2	26.26	0.786592	0.905918	2.51102	caf20∆	WT
YGL054C	1	1	71.78	0.786828	0.905918	1.23599	caf20∆	WT
YDR226W	24	16	1139.74	0.787936	0.90666	1.02313	WT	caf20∆
YGL039W	5	4	87.38	0.789447	0.90782	1.01498	WT	caf20∆
YOR137C	6	4	39.24	0.790307	0.90782	1.16394	WT	caf20∆
YLR340W	18	15	815.89	0.790962	0.90782	1.05497	caf20∆	WT
YML063W	29	3	1232.04	0.791125	0.90782	1.02997	caf20∆	WT
YGR034W	13	2	600.3	0.792265	0.90782	1.03496	WT	caf20∆
YFL039C	37	34	1830.53	0.792456	0.90782	1.01456	WT	caf20∆
YDL040C	26	20	754.08	0.792516	0.90782	1.01921	WT	caf20∆
YGR032W	21	2	749.58	0.792659	0.90782	1.39798	caf20∆	WT
YLR225C	4	1	47.06	0.793639	0.90841	1.65917	caf20∆	WT
YBR034C	6	3	105.09	0.795995	0.908946	1.0458	caf20∆	WT
YGR218W	18	11	444.1	0.796561	0.908946	1.02392	caf20∆	WT
YPL183C	14	5	122.51	0.79674	0.908946	1.02888	WT	caf20∆
YDR182W	6	3	65.93	0.797368	0.908946	1.1043	caf20∆	WT
YOR163W	3	3	84.72	0.797668	0.908946	1.02103	WT	caf20∆
YLR186W	6	5	217.83	0.797684	0.908946	1.02425	caf20∆	WT
YGR159C	14	14	640.5	0.798032	0.908946	1.03655	caf20∆	WT
YJL020C	14	10	266.12	0.798523	0.908946	1.10802	caf20∆	WT
YDR294C	9	6	102.25	0.798654	0.908946	1.10971	caf20∆	WT
YIR038C	7	5	173.49	0.799034	0.908946	1.05397	caf20∆	WT
YBR031W	19	2	1358.81	0.799222	0.908946	1.09608	caf20∆	WT
YKR092C	3	3	44.18	0.800636	0.910025	1.15139	caf20∆	WT
YNL002C	8	4	163.03	0.801816	0.910837	1.0068	caf20∆	WT
YGR281W	19	6	94.12	0.802644	0.911249	1.07842	caf20∆	WT
YDL121C	2	1	34.01	0.803134	0.911275	1.00463	WT	caf20∆
YGR090W	16	11	360.96	0.804439	0.911333	1.02558	WT	caf20∆
YGL153W	7	5	180.12	0.804586	0.911333	1.25909	WT	caf20∆
YPL091W	19	11	594.04	0.805045	0.911333	1.01507	WT	caf20∆
YDR303C	8	1	75.91	0.80505	0.911333	1.58866	WT	caf20∆
YGR229C	6	3	88.42	0.806373	0.912302	1.09947	WT	caf20∆
YLR175W	16	13	496.38	0.807709	0.913286	1.01784	WT	caf20∆
YGL228W	12	5	198.62	0.808638	0.913808	1.04595	caf20∆	WT
YKL206C	2	2	41.32	0.812013	0.916504	1.1225	caf20∆	WT
YKR016W	10	7	374.02	0.812624	0.916504	1.03117	WT	caf20∆
YLR059C	2	1	105.91	0.812647	0.916504	1.10238	WT	caf20∆
YIL016W	1	1	24.81	0.812899	0.916504	1.49061	caf20∆	WT
YGL022W	5	3	144.12	0.813626	0.916794	1.19185	WT	caf20∆
YDL112W	13	8	154.05	0.815356	0.917191	1.07124	WT	caf20∆
YGL245W	47	33	1934.2	0.816469	0.917191	1.0075	WT	caf20∆
YMR008C	2	1	45.94	0.817352	0.917191	1.72334	WT	caf20∆
YPL199C	3	2	59.5	0.817555	0.917191	1.57424	WT	caf20∆
YOR217W	8	2	83.72	0.817765	0.917191	1.25795	caf20∆	WT
YBR244W	6	3	221.56	0.818705	0.917191	1.021	WT	caf20∆
YML036W	6	3	184.16	0.819102	0.917191	1.1826	caf20∆	WT
YLR118C	3	3	153.62	0.819269	0.917191	1.02467	WT	caf20∆
YLR441C	28	4	1218.77	0.819726	0.917191	1.01166	WT	caf20∆
YMR031C	22	10	538.06	0.820443	0.917191	1.01064	WT	caf20∆
YPL239W	7	5	230.4	0.820452	0.917191	1.07041	WT	caf20∆
YOL004W	12	7	72.69	0.820772	0.917191	1.30796	WT	caf20∆
YML086C	11	8	331.59	0.820874	0.917191	1.11794	caf20∆	WT
YER099C	7	2	180.24	0.821063	0.917191	1.07816	WT	caf20∆
YOL077C	4	3	79.47	0.821127	0.917191	1.01194	WT	caf20∆
YOL109W	12	8	517.44	0.821594	0.917191	1.0314	caf20∆	WT
YNL067W	14	2	781.28	0.822179	0.917191	1.00825	caf20∆	WT
YIL110W	6	3	50.68	0.822423	0.917191	1.09602	WT	caf20∆
YLR285W	2	2	58.33	0.823528	0.917447	1.14253	caf20∆	WT
YML120C	4	3	44.72	0.823591	0.917447	1.09544	WT	caf20∆
YNL180C	4	4	64.01	0.825174	0.918041	1.00582	WT	caf20∆
YOL022C	7	3	76.17	0.825239	0.918041	1.03546	caf20∆	WT
YNR017W	5	5	132.85	0.825532	0.918041	1.03668	caf20∆	WT
YBR248C	27	20	1152.46	0.826293	0.918364	1.01652	caf20∆	WT
YML101C	1	1	13.77	0.827165	0.918394	1.67764	caf20∆	WT
YDL053C	1	1	73.55	0.82726	0.918394	1.05632	caf20∆	WT
YOR086C	19	9	520	0.82845	0.919194	1.00926	caf20∆	WT
YLR220W	3	2	61.79	0.82952	0.919755	1.02897	caf20∆	WT
YKL148C	5	2	116.07	0.829897	0.919755	1.07952	caf20∆	WT
YNL007C	15	12	608.97	0.83191	0.921222	1.01482	caf20∆	WT
YLR197W	15	14	715.94	0.832162	0.921222	1.02083	caf20∆	WT
YNL160W	5	5	217.64	0.83404	0.921874	1.05838	caf20∆	WT
YOR165W	13	9	170.71	0.834088	0.921874	1.04789	caf20∆	WT
YKR025W	3	3	82.2	0.8345	0.921874	1.01547	WT	caf20∆
YHR201C	10	8	168.84	0.834638	0.921874	1.03692	WT	caf20∆
YHR010W	11	1	676.67	0.835149	0.921918	1.27198	caf20∆	WT
YGL195W	52	37	1750.18	0.835699	0.922004	1.01722	caf20∆	WT
YML078W	6	3	290.56	0.836443	0.922305	1.02661	WT	caf20∆
YGR264C	30	25	1093.44	0.838573	0.924133	1.00666	caf20∆	WT
YMR314W	11	8	400.76	0.840566	0.925807	1.00785	WT	caf20∆
YBR164C	4	3	105.75	0.841395	0.926198	1.02809	WT	caf20∆
YOL041C	14	7	205.03	0.842309	0.926682	1.03565	caf20∆	WT
YAR071W;YHR215W	8	3	215.63	0.844303	0.928259	1.21104	caf20∆	WT
YJL148W	2	1	48.49	0.844692	0.928259	1.09124	WT	caf20∆
YDR060W	10	6	229.96	0.845814	0.92897	1.43561	WT	caf20∆
YDR272W	5	4	165.46	0.846684	0.929404	1.05082	caf20∆	WT
YEL019C	2	2	20.15	0.847182	0.929429	1.13148	caf20∆	WT
YDR481C	10	6	200.61	0.847737	0.929492	1.01359	caf20∆	WT
YLR029C;YMR121C	12	9	653.5	0.848191	0.929492	1.0244	WT	caf20∆
YDR062W	10	7	222.15	0.849918	0.93049	1.02019	WT	caf20∆
YHR104W	15	11	643.91	0.850053	0.93049	1.01082	WT	caf20∆
YNL243W	17	9	477.59	0.851189	0.931211	1.27441	WT	caf20∆
YDR148C	6	5	234.27	0.853167	0.9325	1.00304	caf20∆	WT
YMR250W	5	3	112.11	0.853321	0.9325	1.05086	caf20∆	WT
YOR182C	2	2	132	0.855699	0.934032	1.00647	caf20∆	WT
YDR518W	4	4	76.6	0.855869	0.934032	1.03842	caf20∆	WT
YBL087C	13	9	593.67	0.856408	0.934032	1.0448	caf20∆	WT
YDR476C	2	2	87.9	0.856634	0.934032	1.3368	WT	caf20∆
YDL153C	8	5	180.87	0.858931	0.936014	1.05643	caf20∆	WT
YEL011W	5	4	53.62	0.860077	0.936742	1.00023	caf20∆	WT
YNL183C	6	3	58.97	0.861593	0.93787	1.14752	caf20∆	WT
YDL015C	5	2	68.45	0.862605	0.937932	1.05215	caf20∆	WT
YOR185C	11	8	474.55	0.86261	0.937932	1.00859	WT	caf20∆
YEL030W	18	3	533.86	0.864184	0.938678	1.06287	caf20∆	WT
YER030W	6	4	150.86	0.864256	0.938678	1.0217	WT	caf20∆
YNL016W	9	6	171.1	0.865467	0.939255	1.00347	caf20∆	WT
YJL140W	3	3	104.56	0.866686	0.939255	1.03021	caf20∆	WT
YMR080C	8	4	50.55	0.867036	0.939255	1.00869	WT	caf20∆
YBL032W	5	1	36.21	0.86723	0.939255	1.01651	WT	caf20∆
YDL080C	5	2	179.66	0.867542	0.939255	1.12204	caf20∆	WT
YJL190C	11	9	747.85	0.86767	0.939255	1.01985	WT	caf20∆
YCL001W	2	2	38.18	0.868266	0.93938	1.10614	WT	caf20∆
YHL007C	7	1	57.19	0.869057	0.939472	1.1311	WT	caf20∆
YOR369C	9	9	862.23	0.869768	0.939472	1.00514	caf20∆	WT
YNL312W	3	2	56.5	0.869792	0.939472	1.03265	caf20∆	WT
YOL149W	1	1	64.57	0.870854	0.940099	1.74308	WT	caf20∆
YDR346C	8	8	229.27	0.871546	0.940327	1.00067	WT	caf20∆
YKR096W	3	2	19.78	0.873649	0.942075	1.00663	WT	caf20∆
YOR069W	7	3	51.28	0.875275	0.942759	1.33776	caf20∆	WT
YJR117W	8	7	249.22	0.875392	0.942759	1.16137	WT	caf20∆
YFR052W	9	8	307.21	0.876016	0.942759	1.0601	caf20∆	WT
YFR024C-A	4	1	122.17	0.876211	0.942759	1.10106	caf20∆	WT
YLL013C	6	3	182.14	0.877053	0.942884	1.06006	caf20∆	WT
YER031C	7	4	355.55	0.87751	0.942884	1.0181	caf20∆	WT
YLR452C	9	4	80.95	0.877774	0.942884	1.02554	caf20∆	WT
YLR133W	5	3	70.81	0.878923	0.943201	1.04925	caf20∆	WT
YGR012W	5	2	116.94	0.879499	0.943201	1.6263	WT	caf20∆
YPL154C	12	10	673.4	0.880263	0.943201	1.00408	caf20∆	WT
YIL075C	24	15	701.77	0.880376	0.943201	1.04294	caf20∆	WT
YMR208W	7	5	266.14	0.880481	0.943201	1.06558	WT	caf20∆
YBL057C	4	1	115.53	0.882267	0.944266	1.61482	caf20∆	WT
YBR151W	3	2	84.02	0.882536	0.944266	1.02172	caf20∆	WT
YLR418C	10	5	162.37	0.883355	0.944266	1.26246	WT	caf20∆
YER141W	4	1	97.34	0.884	0.944266	1.06097	caf20∆	WT
YKL073W	6	3	111.64	0.8841	0.944266	1.13918	caf20∆	WT
YDR033W	3	1	129.48	0.884666	0.944266	1.00399	WT	caf20∆
YHR205W	4	1	30.39	0.884857	0.944266	1.07946	WT	caf20∆
YPR016C	6	5	288.78	0.888955	0.947797	1.01239	caf20∆	WT
YHR069C	5	4	166.39	0.889135	0.947797	1.00863	caf20∆	WT
YLR222C	6	4	76.89	0.889732	0.947901	1.1135	caf20∆	WT
YCR083W	5	5	135.19	0.890311	0.947901	1.01635	WT	caf20∆
YHR087W	5	4	309.93	0.890688	0.947901	1.01788	caf20∆	WT
YGR082W	5	5	202.84	0.892046	0.948814	1.13519	WT	caf20∆
YJR145C	22	14	1127.63	0.892516	0.948814	1.02727	caf20∆	WT
YGL062W	37	9	1609.95	0.893297	0.949128	1.04455	caf20∆	WT
YNL229C	5	3	97.5	0.894724	0.949709	1.01215	caf20∆	WT
YGL252C	10	4	197.06	0.895204	0.949709	1.03133	caf20∆	WT
YJR077C	12	11	492.55	0.895577	0.949709	1.21071	WT	caf20∆
YPR035W	21	15	754.26	0.895787	0.949709	1.04289	caf20∆	WT
YEL047C	20	13	683.74	0.897906	0.95144	1.0067	WT	caf20∆
YBR035C	13	11	514.26	0.900966	0.954086	1.00528	WT	caf20∆
YGL020C	1	1	65.52	0.90171	0.954086	1.62352	caf20∆	WT
YLL026W	39	32	1643.11	0.901868	0.954086	1.0043	caf20∆	WT
YBL039C	24	19	952.7	0.90298	0.954458	1.00204	WT	caf20∆
YHR064C	25	22	1099.33	0.903196	0.954458	1.01144	caf20∆	WT
YDR408C	6	6	352.86	0.903744	0.954521	1.00286	caf20∆	WT
YOR085W	3	2	51.33	0.904973	0.95501	1.678	caf20∆	WT
YDL004W	2	1	20.83	0.905184	0.95501	1.02959	caf20∆	WT
YBR015C	7	1	114.31	0.907434	0.956648	1.25434	WT	caf20∆
YML022W	4	2	190.09	0.907714	0.956648	1.01979	caf20∆	WT
YFR049W	6	5	74.04	0.909012	0.9575	1.01065	caf20∆	WT
YIL118W	4	4	167.28	0.911234	0.959323	1.00867	caf20∆	WT
YIL044C	1	1	52.63	0.912569	0.95978	1.56541	caf20∆	WT
YLR199C	4	4	143.69	0.913653	0.95978	1.0257	caf20∆	WT
YPL184C	6	2	71.69	0.913738	0.95978	1.05542	WT	caf20∆
YGR275W	2	1	74.26	0.914051	0.95978	1.36592	caf20∆	WT
YHR190W	9	7	301.78	0.914176	0.95978	1.01863	caf20∆	WT
YPL117C	11	10	336.07	0.914614	0.95978	1.01217	caf20∆	WT
YDR322C-A	3	1	23.25	0.915217	0.959898	1.89896	caf20∆	WT
YNL069C	20	8	705.5	0.916275	0.960492	1.00659	caf20∆	WT
YOR303W	9	5	284.2	0.917407	0.961164	1.01621	WT	caf20∆
YHR003C	5	1	48.46	0.919931	0.961848	1.71966	caf20∆	WT
YMR012W	34	26	1325.89	0.919953	0.961848	1.01102	caf20∆	WT
YGL232W	10	5	252.84	0.919995	0.961848	1.01458	WT	caf20∆
YCR072C	7	4	94.61	0.920029	0.961848	1.05057	WT	caf20∆
YMR260C	7	4	313.82	0.923351	0.963588	1.00206	WT	caf20∆
YCR087C-A	5	3	90.02	0.923517	0.963588	1.13998	caf20∆	WT
YDR516C	8	6	265.8	0.923605	0.963588	1.01862	caf20∆	WT
YLR032W	3	1	43.83	0.923664	0.963588	1.31584	WT	caf20∆
YFL008W	13	6	61.93	0.926163	0.96568	1.03231	WT	caf20∆
YDR120C	11	4	111.8	0.926893	0.965901	1.00388	WT	caf20∆
YCL028W	7	4	202.69	0.927986	0.965901	1.01091	caf20∆	WT
YDR190C	14	11	342.64	0.928477	0.965901	1.0352	caf20∆	WT
YNL307C	14	9	363.68	0.928822	0.965901	1.02063	caf20∆	WT
YKL192C	2	2	85.11	0.928846	0.965901	1.00665	caf20∆	WT
YLR060W	24	17	809.84	0.929897	0.966075	1.00255	WT	caf20∆
YCL057C-A	3	2	76.92	0.930001	0.966075	1.12861	caf20∆	WT
YKL056C	11	10	639.96	0.930931	0.966526	1.00302	caf20∆	WT
YMR149W	2	2	128.4	0.932283	0.967417	1.3555	WT	caf20∆
YOR251C	6	4	270.08	0.933357	0.968018	1.01846	WT	caf20∆
YPL032C	7	5	110.36	0.935506	0.969731	1.01376	WT	caf20∆
YDL190C	10	4	124.58	0.936667	0.969806	1.03454	WT	caf20∆
YOL092W	2	1	59.08	0.937129	0.969806	2.38646	caf20∆	WT
YKL181W	10	7	308.37	0.937269	0.969806	1.00496	caf20∆	WT
YKL057C	9	3	118.36	0.937562	0.969806	1.00977	WT	caf20∆
YDL132W	8	4	151.92	0.938898	0.970674	1.02208	WT	caf20∆
YPR043W	6	6	382.98	0.939598	0.970885	1.01008	WT	caf20∆
YOR117W	18	13	502.55	0.945897	0.976877	1.00375	WT	caf20∆
YBL022C	9	7	150.68	0.949337	0.979912	1.09744	WT	caf20∆
YOR007C	21	16	944.02	0.951447	0.980541	1.00084	WT	caf20∆
YMR296C	4	3	133.02	0.951485	0.980541	1.45646	caf20∆	WT
YJL167W	14	7	684.69	0.951707	0.980541	1.00195	WT	caf20∆
YMR056C	9	2	146.4	0.951952	0.980541	1.06308	WT	caf20∆
YGR195W	3	2	44.49	0.953099	0.980689	1.00192	caf20∆	WT
YKL080W	16	14	862.98	0.953099	0.980689	1.00168	caf20∆	WT
YOL012C	4	1	125.07	0.954509	0.98144	1.05166	WT	caf20∆
YGL092W	10	5	119.17	0.955042	0.98144	1.00918	caf20∆	WT
YJR060W	4	2	130.56	0.955335	0.98144	1.00136	caf20∆	WT
YMR295C	3	3	60.48	0.958485	0.983727	1.11966	caf20∆	WT
YOL056W	5	2	66.88	0.95903	0.983727	1.17699	caf20∆	WT
YML130C	6	6	182.16	0.959071	0.983727	1.00194	WT	caf20∆
YGR155W	36	31	2135.47	0.960208	0.983872	1.00246	WT	caf20∆
YGL040C	7	6	224.64	0.960219	0.983872	1.00301	caf20∆	WT
YPR181C	19	17	815.7	0.961098	0.983878	1.05086	caf20∆	WT
YJL122W	3	1	75.85	0.96154	0.983878	1.01436	caf20∆	WT
YPL243W	12	9	471.94	0.961735	0.983878	1.01203	caf20∆	WT
YJR133W	5	3	90.76	0.964182	0.984762	1.06052	caf20∆	WT
YNL111C	2	1	43.1	0.964637	0.984762	1.00209	WT	caf20∆
YNL267W	5	1	69.73	0.96575	0.984762	1.02596	caf20∆	WT
YKR014C	7	6	235.44	0.965915	0.984762	1.00106	WT	caf20∆
YOR207C	16	7	194.54	0.965957	0.984762	1.03431	caf20∆	WT
YEL040W	3	3	28.61	0.966012	0.984762	1.03472	WT	caf20∆
YGL223C	2	2	25.8	0.966124	0.984762	1.07048	WT	caf20∆
YHR007C	7	5	207.92	0.96777	0.985115	1.0646	caf20∆	WT
YPR019W	4	2	77.53	0.968001	0.985115	1.4437	caf20∆	WT
YIL137C	11	7	287.22	0.968551	0.985115	1.02001	caf20∆	WT
YDR101C	17	13	468.36	0.969422	0.985115	1.01264	caf20∆	WT
YMR074C	2	2	116.89	0.969429	0.985115	1.01287	caf20∆	WT
YOL049W	11	5	261.52	0.969564	0.985115	1.00282	WT	caf20∆
YKR042W	1	1	22.33	0.970043	0.985115	1.00998	caf20∆	WT
YDL161W	9	3	146.55	0.970502	0.985115	1.96043	caf20∆	WT
YGR234W	19	15	1027.26	0.971692	0.985811	1.01894	caf20∆	WT
YKL058W	2	2	64.15	0.972217	0.985832	1.66435	caf20∆	WT
YFL034C-A	5	2	135.17	0.973329	0.986448	1.01319	WT	caf20∆
YPR149W	2	1	54.9	0.974088	0.986468	2.64845	caf20∆	WT
YDL007W	16	11	487.19	0.974747	0.986468	1.02443	WT	caf20∆
YDL031W	11	4	96.66	0.974955	0.986468	1.00759	caf20∆	WT
YIR006C	12	7	334.1	0.975369	0.986468	1.01425	caf20∆	WT
YOR191W	16	3	131.9	0.975872	0.986468	1.03155	WT	caf20∆
YNL071W	13	9	460.74	0.976551	0.986644	1.08907	caf20∆	WT
YPR080W	34	22	1762.15	0.978243	0.987844	1.00404	caf20∆	WT
YDR232W	6	5	126.79	0.979166	0.987907	1.00695	caf20∆	WT
YIL069C	9	6	456.39	0.979316	0.987907	1.00046	caf20∆	WT
YML008C	13	12	691.02	0.983334	0.991448	1.03425	WT	caf20∆
YDL029W	14	10	391.94	0.985781	0.993346	1.01448	caf20∆	WT
YBR077C	1	1	49.2	0.986752	0.993346	1.06946	WT	caf20∆
YLR390W-A	3	3	52.94	0.987129	0.993346	1.06083	WT	caf20∆
YGL112C	4	2	67.17	0.987513	0.993346	1.08846	caf20∆	WT
YPL265W	6	5	110.36	0.987776	0.993346	1.00656	caf20∆	WT
YLR378C	6	3	112.8	0.988265	0.993346	1.12823	caf20∆	WT
YGL101W	5	4	81.97	0.990188	0.99447	1.02046	caf20∆	WT
YMR089C	8	1	79.47	0.9904	0.99447	1.06245	WT	caf20∆
YIL002W-A	6	5	134.85	0.990954	0.994515	1.01133	WT	caf20∆
YJL174W	1	1	15.49	0.994962	0.998024	1.10068	caf20∆	WT
YKL027W	4	3	45.56	0.995713	0.998266	1.09144	caf20∆	WT
YKL009W	9	5	300.24	0.997982	1	1.03662	caf20∆	WT
YDR092W	3	2	59.9	0.998597	1	1.01315	caf20∆	WT
YOR294W	2	2	93.94	0.999213	1	1.01577	WT	caf20∆
YDR150W	16	6	196.61	0.99951	1	1.04035	WT	caf20∆
YDR509W	1	1	22.5	1	1	1	---	---

## Sheet: Dataset4. WT VS eap1∆ proteome
Accession	Peptide.count	Peptides.used.for.quantitation	Confidence.score	Anova..p.	FDR	Max.fold.change	Highest.mean.condition	Lowest.mean.condition
YLR303W	15	12	929.53	1.52e-11	2.9716e-08	60.3988	WT	eap1∆
YKL054C	17	16	333.64	7.92e-10	6.24948e-07	2.58715	eap1∆	WT
YNL212W	10	3	59.28	9.59e-10	6.24948e-07	11.541	WT	eap1∆
YJR016C	42	36	2242.49	1.62e-08	5.31108e-06	2.60532	WT	eap1∆
YDL066W;YLR174W	33	21	1663.38	1.62e-08	5.31108e-06	2.95086	WT	eap1∆
YKR089C	6	1	28.59	1.63e-08	5.31108e-06	34.0558	WT	eap1∆
YOL058W	25	21	1476.73	2.11e-08	5.89293e-06	4.60972	WT	eap1∆
YHL030W	17	7	326.06	2.59e-08	6.12567e-06	5.91493	eap1∆	WT
YKL110C	3	1	49.07	2.82e-08	6.12567e-06	11.3035	WT	eap1∆
YOL140W	9	8	243.36	3.16e-08	6.1778e-06	6.21478	WT	eap1∆
YBR112C	12	9	315.72	4e-08	7.10909e-06	2.32716	eap1∆	WT
YER175C	9	4	241.76	5.12e-08	7.76414e-06	6.04842	WT	eap1∆
YOR230W	17	15	825.87	5.34e-08	7.76414e-06	1.88224	WT	eap1∆
YGL251C	9	1	37.21	5.56e-08	7.76414e-06	64.961	eap1∆	WT
YHR029C	9	6	446.67	8.55e-08	1.11435e-05	4.36164	WT	eap1∆
YER086W	27	22	724.89	1.01e-07	1.23409e-05	2.77736	WT	eap1∆
YJR148W	19	13	869.26	1.16e-07	1.334e-05	2.93417	WT	eap1∆
YLR355C	33	28	2073.3	1.31e-07	1.42281e-05	2.05442	WT	eap1∆
YJL159W;YJL160C	5	2	176.5	1.57e-07	1.61545e-05	5.78396	WT	eap1∆
YDL131W	24	5	1371.84	1.77e-07	1.73018e-05	2.9363	WT	eap1∆
YHR208W	23	17	1526.6	2.8e-07	2.60667e-05	2.50779	WT	eap1∆
YJL130C	114	83	5536.06	3.86e-07	3.43014e-05	1.70688	WT	eap1∆
YGL009C	62	49	3152.93	5.18e-07	4.403e-05	3.0305	WT	eap1∆
YDL182W	22	4	1174.95	5.62e-07	4.57796e-05	5.82352	WT	eap1∆
YPR110C	9	8	340.71	6.47e-07	5.05954e-05	1.66166	WT	eap1∆
YGL173C	33	23	706.65	6.79e-07	5.10556e-05	1.71935	eap1∆	WT
YJL088W	15	12	576.14	8.58e-07	6.21256e-05	3.66023	WT	eap1∆
YER069W	35	27	1284.68	1.06e-06	7.40107e-05	3.23006	WT	eap1∆
YLR208W	13	12	534.02	1.13e-06	7.61776e-05	1.4891	WT	eap1∆
YDR233C	9	7	333.89	1.19e-06	7.75483e-05	2.23053	WT	eap1∆
YJL153C	16	11	785.93	1.25e-06	7.88306e-05	10.6511	WT	eap1∆
YIL083C	9	9	291.8	1.33e-06	8.12547e-05	2.73297	WT	eap1∆
YDR117C	6	3	102.22	1.49e-06	8.82712e-05	16.8171	WT	eap1∆
YNR050C	22	19	907.34	1.57e-06	8.88129e-05	7.28948	WT	eap1∆
YFR009W	17	12	455.58	1.59e-06	8.88129e-05	1.68207	eap1∆	WT
YHR023W	18	4	176.48	1.8e-06	9.775e-05	4.726	eap1∆	WT
YPL111W	11	7	231.04	2.21e-06	0.000116772	2.49859	WT	eap1∆
YGR234W	19	15	1027.26	3.2e-06	0.000164421	2.02909	WT	eap1∆
YDR515W	5	1	64.88	3.28e-06	0.000164421	Inf	WT	eap1∆
YPR074C	32	26	1355.08	3.64e-06	0.000176427	1.73072	WT	eap1∆
YPR145W	32	20	1347.93	3.7e-06	0.000176427	2.35795	WT	eap1∆
YBL099W	29	20	1078.5	4e-06	0.000185952	2.38959	WT	eap1∆
YNL004W	6	5	93.55	4.09e-06	0.000185952	2.05825	WT	eap1∆
YKR071C	5	4	147.05	4.2e-06	0.000186614	1.44866	WT	eap1∆
YOR184W	20	19	1212.9	4.68e-06	0.00019966	1.8214	WT	eap1∆
YBR115C	39	30	1255.67	4.7e-06	0.00019966	14.2412	WT	eap1∆
YPL110C	9	4	169.74	4.8e-06	0.00019966	9.7256	eap1∆	WT
YLR300W	12	10	380.35	5.13e-06	0.000208941	2.45722	eap1∆	WT
YLR134W	16	8	616.93	5.49e-06	0.000218569	3.42085	WT	eap1∆
YBL017C	18	9	327.35	5.59e-06	0.000218569	1.97346	eap1∆	WT
YMR108W	30	25	1425.77	6.25e-06	0.000236104	2.2493	WT	eap1∆
YDR341C	38	28	1323.06	6.28e-06	0.000236104	1.45375	WT	eap1∆
YKL204W	5	3	99.75	6.94e-06	0.000255994	28.6028	WT	eap1∆
YGL093W	8	1	68.08	7.43e-06	0.000264814	7.05821	WT	eap1∆
YJL026W	18	12	594.36	7.45e-06	0.000264814	1.98273	WT	eap1∆
YIR034C	15	11	562.07	8.09e-06	0.000282428	6.57933	WT	eap1∆
YKL096W	5	4	330.65	8.55e-06	0.000290216	3.71522	eap1∆	WT
YPR189W	11	5	119.25	8.61e-06	0.000290216	2.7127	eap1∆	WT
YMR096W	15	6	651.09	9e-06	0.00029822	4.219	WT	eap1∆
YNL313C	8	6	200.37	9.41e-06	0.000306609	1.69483	eap1∆	WT
YBL047C	29	21	1064.48	9.77e-06	0.000311854	1.96992	eap1∆	WT
YOL143C	9	8	255.45	9.89e-06	0.000311854	3.59667	WT	eap1∆
YGL195W	52	37	1750.18	1.04e-05	0.00032273	1.74763	eap1∆	WT
YLR129W	10	5	166.61	1.07e-05	0.000326852	2.50698	WT	eap1∆
YCL009C	11	11	465.48	1.09e-05	0.000327839	2.13852	WT	eap1∆
YNL123W	15	12	331.82	1.13e-05	0.00033472	1.86174	eap1∆	WT
YNL241C	23	18	929.55	1.15e-05	0.00033556	1.44454	WT	eap1∆
YJR121W	24	23	1438.21	1.2e-05	0.000342833	2.78979	WT	eap1∆
YPL081W	15	1	774.91	1.21e-05	0.000342833	1.91248	WT	eap1∆
YML123C	5	2	85.28	1.27e-05	0.000352451	16.1881	eap1∆	WT
YLR420W	12	9	197.45	1.28e-05	0.000352451	1.89677	WT	eap1∆
YBR039W	7	7	275.18	1.36e-05	0.000366897	3.12814	WT	eap1∆
YER151C	13	5	244.72	1.37e-05	0.000366897	2.90898	eap1∆	WT
YMR062C	24	18	1097.34	1.46e-05	0.000380573	3.25581	WT	eap1∆
YKL029C	26	20	943.12	1.46e-05	0.000380573	2.63313	WT	eap1∆
YBR208C	22	13	384.3	1.68e-05	0.000432158	1.89178	WT	eap1∆
YCR028C-A	5	2	248.07	1.96e-05	0.000497636	1.58754	WT	eap1∆
YGR279C	8	4	352.55	2.14e-05	0.000536372	1.96388	WT	eap1∆
YDR099W	18	3	1123.16	2.19e-05	0.000541956	1.44789	WT	eap1∆
YJL200C	17	12	510.84	2.25e-05	0.000549844	5.84912	WT	eap1∆
YNL141W	9	7	293.95	2.33e-05	0.000562364	2.00503	WT	eap1∆
YBR093C	7	2	133.74	2.36e-05	0.000562659	4.48712	eap1∆	WT
YML056C	15	3	938.2	2.39e-05	0.000562946	1.65579	WT	eap1∆
YEL021W	30	26	1843.79	2.46e-05	0.000572536	2.08461	eap1∆	WT
YKL215C	13	7	270.4	2.52e-05	0.0005796	2.40147	eap1∆	WT
YPL190C	7	6	159.37	2.62e-05	0.000590994	3.63073	eap1∆	WT
YMR226C	16	12	750.7	2.63e-05	0.000590994	1.48104	WT	eap1∆
YKR044W	3	1	30.16	2.77e-05	0.00060775	2.50572	WT	eap1∆
YPL231W	107	84	5678.91	2.78e-05	0.00060775	1.65697	eap1∆	WT
YCR035C	3	2	45.13	2.8e-05	0.00060775	49.1641	eap1∆	WT
YGL082W	3	2	55.29	2.83e-05	0.00060775	4.84149	WT	eap1∆
YKL211C	15	11	321.77	2.86e-05	0.00060775	1.77661	WT	eap1∆
YOR209C	13	10	449.34	2.95e-05	0.000620134	1.40643	WT	eap1∆
YEL071W	32	25	1467.26	3.03e-05	0.000630176	2.14192	WT	eap1∆
YPL271W	2	2	92.13	3.14e-05	0.000646179	2.63191	WT	eap1∆
YGL026C	33	27	1766.05	3.61e-05	0.000735161	1.68128	WT	eap1∆
YLR410W	22	14	469.83	3.82e-05	0.000769907	2.32449	eap1∆	WT
YGR180C	19	16	932.86	3.97e-05	0.000791975	1.66841	WT	eap1∆
YHR027C	26	22	1087.37	4.58e-05	0.000890189	1.35231	eap1∆	WT
YOR347C	8	5	308.66	4.58e-05	0.000890189	2.24718	eap1∆	WT
YMR217W	27	20	1149.79	4.6e-05	0.000890189	1.62298	WT	eap1∆
YER133W	8	7	316.38	4.66e-05	0.000890189	1.46354	WT	eap1∆
YJL052W	29	14	1429.99	4.69e-05	0.000890189	4.80688	WT	eap1∆
YHR020W	34	25	1495.17	5.15e-05	0.000968101	1.4078	WT	eap1∆
YAR071W;YHR215W	8	3	215.63	5.41e-05	0.00100729	22.872	eap1∆	WT
YBR011C;YPL112C	24	19	1269.67	5.64e-05	0.00103597	1.36436	WT	eap1∆
YDR037W	30	26	1499.85	5.67e-05	0.00103597	1.55163	WT	eap1∆
YAR035W	4	3	65.04	5.91e-05	0.00106539	16.7643	WT	eap1∆
YDR234W	15	9	395.34	5.94e-05	0.00106539	2.16907	WT	eap1∆
YEL046C	15	12	672.81	6.07e-05	0.00107261	1.56415	WT	eap1∆
YJR076C	9	5	150.04	6.09e-05	0.00107261	1.41458	eap1∆	WT
YHR132W-A	5	3	53.81	6.26e-05	0.0010744	1.59764	eap1∆	WT
YKL150W	10	8	256.52	6.27e-05	0.0010744	2.39126	WT	eap1∆
YKR042W	1	1	22.33	6.3e-05	0.0010744	2.7659	WT	eap1∆
YER091C	53	46	3631.87	6.32e-05	0.0010744	1.43801	WT	eap1∆
YLR244C	10	9	325.18	6.68e-05	0.00112581	1.4354	WT	eap1∆
YNL104C	39	19	1726.5	6.92e-05	0.00115312	1.96276	WT	eap1∆
YPL106C	47	28	2424.39	6.96e-05	0.00115312	1.37222	WT	eap1∆
YKR018C	13	9	310.44	7.39e-05	0.00121407	1.32279	eap1∆	WT
YOL109W	12	8	517.44	7.47e-05	0.00121699	1.71056	WT	eap1∆
YEL022W	11	4	132.66	7.63e-05	0.00123278	2.2014	eap1∆	WT
YDR019C	12	12	397.51	7.9e-05	0.00126594	1.61127	WT	eap1∆
YAL021C	7	2	53.93	8.07e-05	0.00128267	2.51604	eap1∆	WT
YER052C	16	12	638.91	8.73e-05	0.00137638	1.93975	WT	eap1∆
YOL064C	10	8	388.8	8.98e-05	0.00140447	2.7373	WT	eap1∆
YHL039W	8	4	130.58	9.21e-05	0.00142901	2.06356	eap1∆	WT
YKR066C	10	7	281.26	9.35e-05	0.00143931	2.50699	WT	eap1∆
YIL094C	17	12	609.18	0.000109043	0.00166546	2.06369	WT	eap1∆
YMR076C	6	2	47.34	0.00011061	0.0016763	8.62965	eap1∆	WT
YPL212C	16	10	223.35	0.000111951	0.00168357	1.65584	WT	eap1∆
YER090W	16	13	772.44	0.000119075	0.00177703	1.41464	WT	eap1∆
YOR164C	6	3	135.5	0.000132289	0.00195928	2.10539	eap1∆	WT
YIL070C	4	3	111.74	0.000135558	0.0019926	1.53137	eap1∆	WT
YOR198C	31	19	1046.37	0.000140274	0.00204653	1.30635	WT	eap1∆
YLL021W	17	9	276.02	0.000146472	0.00212113	2.31136	eap1∆	WT
YJR070C	21	16	832.06	0.00014819	0.00213023	1.53047	WT	eap1∆
YLR027C	21	19	1088.62	0.000151604	0.0021634	1.53961	WT	eap1∆
YBR127C	31	23	1813.62	0.000153918	0.00218051	1.29197	WT	eap1∆
YFL018C	23	19	890.38	0.000156007	0.0021942	1.42809	WT	eap1∆
YOR285W	7	7	166.98	0.000165026	0.00229747	1.48607	WT	eap1∆
YDR487C	9	9	394.27	0.0001657	0.00229747	1.76349	WT	eap1∆
YDL117W	4	1	40.89	0.000187463	0.00258092	30.2139	WT	eap1∆
YDR158W	23	23	1175.44	0.000201469	0.00275435	1.84849	WT	eap1∆
YIL053W	22	13	1351.84	0.000203237	0.00275923	1.78764	WT	eap1∆
YOR335C	52	39	2279.08	0.000204869	0.0027622	1.31788	WT	eap1∆
YOR128C	25	18	959.66	0.000206897	0.00277044	1.34264	eap1∆	WT
YKL060C	31	28	2081.44	0.000214795	0.00285663	1.3538	WT	eap1∆
YJL109C	17	12	391.9	0.000226209	0.0029881	2.12419	eap1∆	WT
YLR008C	4	2	103.3	0.000232029	0.00303168	2.80473	eap1∆	WT
YKL010C	11	7	242.67	0.00023261	0.00303168	3.24057	eap1∆	WT
YBR249C	19	14	741.56	0.0002465	0.00319144	1.79313	WT	eap1∆
YPL226W	36	31	1048.86	0.000256161	0.0032947	1.44484	eap1∆	WT
YER073W	27	19	1034.68	0.000258761	0.00330639	1.93945	WT	eap1∆
YFR051C	6	4	63.94	0.000261798	0.00332348	1.64488	WT	eap1∆
YMR220W	7	4	210.79	0.000266145	0.00335686	1.71807	WT	eap1∆
YDR226W	24	16	1139.74	0.000270073	0.00336539	1.52053	WT	eap1∆
YEL058W	13	10	546.01	0.000270264	0.00336539	1.56367	eap1∆	WT
YKR059W	26	21	1897.25	0.000274402	0.00339529	1.31194	WT	eap1∆
YHR121W	4	4	215.27	0.000277619	0.00339707	2.03515	eap1∆	WT
YBL024W	27	22	752.49	0.000278021	0.00339707	1.57598	eap1∆	WT
YDR044W	5	2	53.67	0.000284186	0.00345083	2.27581	WT	eap1∆
YJL012C	6	4	139.81	0.000285976	0.00345113	4.24348	eap1∆	WT
YBR058C	5	3	107.33	0.000323021	0.00385556	4.99131	eap1∆	WT
YFL010C	5	3	98.31	0.000323433	0.00385556	1.90105	WT	eap1∆
YKL040C	7	7	305.48	0.000328683	0.0038944	1.48843	WT	eap1∆
YLR089C	15	12	382.39	0.000332187	0.0039122	2.85732	WT	eap1∆
YBR145W	7	3	177.32	0.000335009	0.00392181	11.7193	WT	eap1∆
YGR271W	9	2	61.4	0.000345139	0.00401635	1.86687	WT	eap1∆
YGR204W	44	33	1930.23	0.000355394	0.00409433	1.21612	WT	eap1∆
YML001W	7	4	328.18	0.000356029	0.00409433	1.47368	WT	eap1∆
YOL097C	14	9	448.17	0.00035983	0.00410183	1.4242	WT	eap1∆
YGL202W	23	20	1393.69	0.000360877	0.00410183	1.41746	WT	eap1∆
YMR109W	20	11	414.1	0.000365687	0.00413247	1.46767	eap1∆	WT
YOL100W	10	2	79.33	0.000368225	0.00413724	1.65463	eap1∆	WT
YJR139C	19	17	1004.77	0.000371044	0.00414509	1.49428	WT	eap1∆
YPR183W	10	8	213.56	0.000377408	0.00419223	1.56775	WT	eap1∆
YER070W	14	8	415.1	0.000392913	0.0043398	1.53023	eap1∆	WT
YKL216W	8	5	337.87	0.000424905	0.00466251	4.53953	WT	eap1∆
YML057W	3	3	62.38	0.0004269	0.00466251	1.85427	eap1∆	WT
YLL013C	6	3	182.14	0.000429304	0.00466272	2.95479	eap1∆	WT
YOR323C	19	14	706.46	0.000435228	0.00470094	1.44204	WT	eap1∆
YFL045C	18	14	745.19	0.000444093	0.00477034	1.38319	WT	eap1∆
YNL037C	13	12	576.07	0.000461665	0.00492701	1.59216	WT	eap1∆
YCR053W	34	27	1599.33	0.000464541	0.00492701	1.60126	WT	eap1∆
YPL154C	12	10	673.4	0.000466239	0.00492701	1.9319	WT	eap1∆
YDR120C	11	4	111.8	0.00047954	0.00504033	2.00762	WT	eap1∆
YLR088W	4	4	101.55	0.00048325	0.00505216	1.68387	WT	eap1∆
YPL273W;YMR321C	12	8	431.17	0.000493851	0.00513553	2.25252	WT	eap1∆
YPR181C	19	17	815.7	0.000514929	0.00532638	1.55388	WT	eap1∆
YDR304C	7	6	171.52	0.000520391	0.00535455	1.2804	WT	eap1∆
YLR179C	9	6	405.43	0.000523938	0.0053549	2.08448	WT	eap1∆
YDR057W	5	1	47.39	0.000525903	0.0053549	6.44048	WT	eap1∆
YGR019W	15	14	273.55	0.000534002	0.00540919	2.03464	WT	eap1∆
YGR094W	56	38	2348.78	0.000545168	0.00549383	1.23207	WT	eap1∆
YHR132C	3	2	68.37	0.000557123	0.00558552	1.43073	WT	eap1∆
YMR246W	19	12	415.49	0.000560794	0.00559363	1.50757	WT	eap1∆
YNL239W	14	8	572.69	0.000573489	0.00569122	1.41273	WT	eap1∆
YHR008C	10	7	311.43	0.000587358	0.00579942	1.8027	WT	eap1∆
YDR165W	8	7	194.85	0.000604547	0.00593914	1.81124	WT	eap1∆
YOR320C	4	2	46.08	0.000609849	0.00594507	2.24846	eap1∆	WT
YIL108W	4	4	71.55	0.000611232	0.00594507	1.64322	eap1∆	WT
YGR286C	6	2	84.71	0.000618663	0.00596204	3.97413	WT	eap1∆
YHR064C	25	22	1099.33	0.000620331	0.00596204	1.31476	WT	eap1∆
YMR304W	8	4	108	0.000622126	0.00596204	1.8983	eap1∆	WT
YNL157W	4	2	66.81	0.0006297	0.00598475	1.69466	eap1∆	WT
YGL150C	13	5	55.32	0.000630618	0.00598475	1.41975	eap1∆	WT
YDL051W	8	5	316.51	0.000638807	0.00603318	1.55541	WT	eap1∆
YGR159C	14	14	640.5	0.000651544	0.00612389	1.34101	WT	eap1∆
YPL004C	15	9	1006.39	0.000663637	0.0062077	1.2966	WT	eap1∆
YBL032W	5	1	36.21	0.000707502	0.00658651	2.80669	eap1∆	WT
YDR035W	16	11	652.18	0.000761601	0.00699451	1.84573	WT	eap1∆
YPR033C	24	18	1132.43	0.000766211	0.00699451	1.5501	WT	eap1∆
YGR218W	18	11	444.1	0.000766499	0.00699451	1.79669	eap1∆	WT
YBR172C	6	2	110.26	0.000767073	0.00699451	3.74902	eap1∆	WT
YPR169W	5	2	48.12	0.000769217	0.00699451	1.84636	eap1∆	WT
YJR007W	19	13	500.25	0.000784819	0.00710334	1.37892	WT	eap1∆
YDL168W	8	7	308.6	0.000801877	0.00721329	1.34363	WT	eap1∆
YGL184C	4	2	68.59	0.000804347	0.00721329	2.96405	WT	eap1∆
YLL009C	1	1	51.4	0.000831399	0.00742185	1.55597	eap1∆	WT
YPL105C	9	4	103.01	0.000843382	0.00747514	2.3057	eap1∆	WT
YFR004W	7	6	176.91	0.000845016	0.00747514	1.41542	eap1∆	WT
YAL012W	14	12	894.85	0.000862471	0.00759518	1.50882	WT	eap1∆
YKL103C	11	9	347.45	0.000874666	0.00766804	1.51897	WT	eap1∆
YMR038C	8	5	300.41	0.000881164	0.00769052	1.60242	WT	eap1∆
YER057C	7	5	275.4	0.000890911	0.00774103	1.83375	WT	eap1∆
YDL215C	24	17	748.48	0.000901484	0.00777112	2.70307	WT	eap1∆
YLL022C	4	2	35	0.000902324	0.00777112	1.51628	eap1∆	WT
YIL075C	24	15	701.77	0.00090646	0.0077725	1.66213	eap1∆	WT
YLR419W	15	7	95.14	0.00091402	0.0078031	1.78516	WT	eap1∆
YKL081W	23	15	982.69	0.000937483	0.00796861	1.34814	WT	eap1∆
YOL022C	7	3	76.17	0.000951227	0.0080394	1.36421	WT	eap1∆
YMR138W	1	1	15.25	0.000954036	0.0080394	2.07251	eap1∆	WT
YOL154W	4	3	99.73	0.000960573	0.00805974	12.9896	WT	eap1∆
YCR084C	22	16	852.73	0.000973195	0.00813075	1.33959	eap1∆	WT
YKL210W	40	30	1624.89	0.000989785	0.00823417	1.21253	eap1∆	WT
YDL097C	12	9	361.5	0.000999503	0.00827978	1.25901	eap1∆	WT
YOR374W	26	19	1219.35	0.00100416	0.00828326	1.47915	eap1∆	WT
YJR132W	5	4	155.14	0.00102276	0.00840127	2.54071	eap1∆	WT
YOR356W	6	3	186.03	0.00104449	0.00851468	2.13852	WT	eap1∆
YIL138C	13	10	379.78	0.00104528	0.00851468	1.35838	WT	eap1∆
YIL064W	5	3	49.26	0.00106933	0.00867442	2.00592	eap1∆	WT
YNL112W	17	13	706.61	0.00111034	0.00896991	1.61857	WT	eap1∆
YBR079C	35	24	1111.37	0.00112232	0.00899786	1.25775	eap1∆	WT
YJL123C	10	6	453.1	0.00112301	0.00899786	1.28922	eap1∆	WT
YDR153C	4	2	116.18	0.0011471	0.00915337	1.45198	eap1∆	WT
YMR189W	22	16	719.56	0.00118191	0.00939285	1.27544	WT	eap1∆
YDR068W	7	3	114.59	0.00120791	0.00956057	1.51909	eap1∆	WT
YML034W	6	2	60.73	0.00122568	0.00966215	7.29338	eap1∆	WT
YLR398C	16	5	136.5	0.00125926	0.00988693	3.55192	eap1∆	WT
YJR103W	11	6	177.82	0.00128493	0.0100481	1.84728	WT	eap1∆
YGL206C	53	44	2237.19	0.00129123	0.0100572	1.29121	eap1∆	WT
YDR074W	20	16	673.68	0.00133527	0.0103198	1.77993	eap1∆	WT
YLR153C	29	24	1293.21	0.0013355	0.0103198	1.4858	WT	eap1∆
YNR043W	7	7	409.13	0.00143318	0.011031	1.52092	WT	eap1∆
YJL020C	14	10	266.12	0.00149727	0.011479	1.56383	eap1∆	WT
YOR317W	27	20	823.98	0.00152597	0.0116194	1.38123	WT	eap1∆
YNL087W	7	4	181.15	0.00152746	0.0116194	4.17902	eap1∆	WT
YIR001C	6	4	67.42	0.00155083	0.0117515	1.40804	WT	eap1∆
YOR069W	7	3	51.28	0.00158173	0.0119393	2.23497	eap1∆	WT
YDL160C	10	9	320.3	0.0015909	0.0119623	1.48656	eap1∆	WT
YAL036C	10	5	145.71	0.00160855	0.0120487	1.33885	eap1∆	WT
YIR037W	6	4	201.61	0.00164376	0.0121676	1.60917	WT	eap1∆
YPR135W	11	3	133.11	0.00164548	0.0121676	4.35133	eap1∆	WT
YOR298C-A	6	4	279.64	0.00164596	0.0121676	1.96122	eap1∆	WT
YGL048C	15	9	452.87	0.00165315	0.0121676	1.38046	eap1∆	WT
YER021W	14	9	429.85	0.00165554	0.0121676	1.41992	eap1∆	WT
YNL189W	12	10	315.33	0.00168331	0.0123166	1.54448	eap1∆	WT
YJR010W	13	11	268.54	0.00169278	0.0123166	1.6573	WT	eap1∆
YEL060C	10	6	299.47	0.00169471	0.0123166	1.57098	WT	eap1∆
YNL061W	12	9	446.48	0.00170557	0.0123496	1.67111	WT	eap1∆
YOR283W	6	4	109.52	0.00171894	0.0124005	1.46815	WT	eap1∆
YMR309C	17	11	777.28	0.00181355	0.0130349	1.35097	eap1∆	WT
YIL116W	13	9	470.89	0.0018354	0.0131436	1.45061	WT	eap1∆
YER081W	18	6	820.12	0.00189241	0.0135024	3.9014	WT	eap1∆
YPL117C	11	10	336.07	0.00190537	0.0135455	1.74677	WT	eap1∆
YHR013C	5	5	119.79	0.00196183	0.0138963	1.39975	eap1∆	WT
YKL182W	105	93	5258.32	0.00198602	0.0140169	1.27185	eap1∆	WT
YGR173W	6	6	218.15	0.00200307	0.0140864	1.22499	WT	eap1∆
YHR138C	2	1	40.24	0.00202134	0.0141274	5.63327	eap1∆	WT
YPR035W	21	15	754.26	0.00202689	0.0141274	2.12195	WT	eap1∆
YPR068C	4	2	34.89	0.00203158	0.0141274	1.32941	WT	eap1∆
YNL129W	3	1	79.48	0.00203782	0.0141274	2.9375	WT	eap1∆
YOR089C	4	3	127.91	0.00222855	0.0153533	1.53351	WT	eap1∆
YOR108W	24	6	1010.84	0.00223034	0.0153533	1.75485	WT	eap1∆
YAL038W	53	42	3354.46	0.00224625	0.0154085	1.33744	WT	eap1∆
YDR129C	26	19	1020.98	0.00230082	0.0157277	1.23676	eap1∆	WT
YJR105W	18	14	1095.29	0.00238959	0.0162775	1.38971	WT	eap1∆
YDR377W	2	2	27.76	0.0025351	0.0172087	3.5117	WT	eap1∆
YDR155C	11	7	766.92	0.00256055	0.0173213	1.69809	WT	eap1∆
YGL244W	7	4	98.74	0.00257821	0.0173807	1.42573	eap1∆	WT
YGR280C	3	3	44.03	0.00259088	0.0174061	14.6394	eap1∆	WT
YER120W	8	6	340.99	0.00263224	0.0176233	1.2787	WT	eap1∆
YJR142W	2	1	46.84	0.00267193	0.0178281	17.3377	eap1∆	WT
YLR250W	4	4	123.42	0.00268636	0.0178634	1.58011	WT	eap1∆
YMR318C	17	16	835.67	0.00272558	0.0180627	1.20543	eap1∆	WT
YGR037C	8	6	553.4	0.00274429	0.0181253	1.68549	WT	eap1∆
YGR155W	36	31	2135.47	0.00277488	0.0182656	1.27662	WT	eap1∆
YGR116W	30	17	631.45	0.0028119	0.0183911	1.66122	eap1∆	WT
YKL113C	4	2	40.25	0.00281642	0.0183911	1.90559	eap1∆	WT
YKR095W	24	14	279.39	0.00282216	0.0183911	2.58275	eap1∆	WT
YIL002C	4	1	43.33	0.00284923	0.0184781	12.0948	eap1∆	WT
YPL059W	6	5	262.31	0.00285441	0.0184781	1.51597	WT	eap1∆
YKL206C	2	2	41.32	0.00292651	0.0188473	1.92626	eap1∆	WT
YJR025C	10	7	287.37	0.00293074	0.0188473	2.26154	WT	eap1∆
YKL035W	28	21	1177.46	0.00298733	0.0191422	1.1405	WT	eap1∆
YCR060W	1	1	14.31	0.00300364	0.0191422	25.273	eap1∆	WT
YLR175W	16	13	496.38	0.00300597	0.0191422	1.24966	WT	eap1∆
YLR113W	5	4	150.62	0.00303486	0.0192635	2.06722	eap1∆	WT
YHR025W	12	11	489.67	0.00311729	0.0197226	1.31543	WT	eap1∆
YML105C	3	2	70.29	0.00313519	0.0197719	2.78845	eap1∆	WT
YML028W	14	12	932.85	0.00314851	0.0197921	1.17258	WT	eap1∆
YJL041W	20	17	381.3	0.00322211	0.0201898	1.2857	WT	eap1∆
YEL037C	10	10	376.19	0.00336345	0.0210081	1.37505	WT	eap1∆
YEL038W	3	2	90.8	0.00346011	0.021543	1.87525	WT	eap1∆
YAL035W	36	19	1151.08	0.00348506	0.0216295	1.32108	eap1∆	WT
YOL059W	13	10	542.76	0.00356449	0.0220525	1.77301	WT	eap1∆
YOR109W	9	5	249.25	0.0036148	0.0222932	2.00604	eap1∆	WT
YLR371W	14	2	61.97	0.00363616	0.0223544	2.42937	eap1∆	WT
YIL022W	12	7	320.84	0.00366803	0.0224326	1.66212	WT	eap1∆
YAL044C	6	5	511.16	0.00367262	0.0224326	1.34217	WT	eap1∆
YKL094W	4	2	72.8	0.00369067	0.0224326	3.05204	WT	eap1∆
YBR137W	2	1	96.79	0.00369478	0.0224326	1.70416	WT	eap1∆
YML078W	6	3	290.56	0.00371347	0.0224763	1.52458	WT	eap1∆
YDL110C	6	4	283.48	0.00377338	0.0227684	1.31902	WT	eap1∆
YHR111W	4	1	41.97	0.0038453	0.0231221	17.4239	WT	eap1∆
YKR043C	10	8	561.67	0.00385565	0.0231221	1.2771	WT	eap1∆
YPL210C	12	8	379.07	0.00390244	0.0231977	1.31097	eap1∆	WT
YDR356W	14	2	71.83	0.00391321	0.0231977	2.34738	eap1∆	WT
YLR384C	17	11	389.75	0.00391416	0.0231977	1.53538	WT	eap1∆
YHR046C	3	2	40.34	0.00391573	0.0231977	3.53209	WT	eap1∆
YOR165W	13	9	170.71	0.00403387	0.0238254	1.53733	eap1∆	WT
YOR120W	5	2	204.01	0.00406205	0.0239196	3.08944	WT	eap1∆
YBR121C	43	36	1941.61	0.00412118	0.0241949	1.16726	WT	eap1∆
R0040C	3	2	98.06	0.00417283	0.0243913	10.5277	eap1∆	WT
YGL062W	37	9	1609.95	0.00417959	0.0243913	1.81926	WT	eap1∆
YHR039C-A	8	5	369.45	0.00424886	0.0247218	1.12884	WT	eap1∆
YBR196C	32	27	1673.68	0.00450411	0.0261292	1.16275	WT	eap1∆
YBL064C	7	5	252.27	0.00451884	0.0261371	1.7844	WT	eap1∆
YJR104C	12	9	605.26	0.00456488	0.0262767	1.16432	WT	eap1∆
YJL145W	10	7	133.02	0.00456987	0.0262767	1.34875	WT	eap1∆
YNL248C	12	6	194.96	0.00474432	0.0271998	1.31364	WT	eap1∆
YLR229C	2	1	61.53	0.00479486	0.0274092	1.60256	WT	eap1∆
YDR071C	10	9	543.75	0.00484443	0.0275542	1.34801	WT	eap1∆
YFL039C	37	34	1830.53	0.00484847	0.0275542	1.25993	WT	eap1∆
YDR518W	4	4	76.6	0.00486251	0.0275542	1.52246	WT	eap1∆
YHR170W	14	10	469.02	0.00492488	0.027827	1.354	WT	eap1∆
YDR091C	19	15	647.34	0.00497562	0.0280327	1.09552	WT	eap1∆
YCL064C	15	9	431.98	0.00503245	0.0282714	1.86814	eap1∆	WT
YIL038C	9	2	76.5	0.00507593	0.0284339	4.38583	eap1∆	WT
YLR351C	12	10	417.37	0.00512097	0.0286043	1.4402	WT	eap1∆
YHR019C	30	27	1495.68	0.00517052	0.0287988	1.26313	WT	eap1∆
YBR159W	6	3	148.49	0.00523008	0.0289916	1.96054	eap1∆	WT
YML126C	21	15	889.36	0.0052348	0.0289916	1.35398	WT	eap1∆
YJL055W	8	7	207.75	0.00532353	0.0293844	1.31364	WT	eap1∆
YOL005C	3	2	48.7	0.00533579	0.0293844	1.66131	eap1∆	WT
YGL112C	4	2	67.17	0.00540396	0.0296762	1.92986	eap1∆	WT
YBL036C	11	7	276.77	0.00546636	0.0299348	1.19032	WT	eap1∆
YGR088W	10	9	189.58	0.00551893	0.0301383	3.74314	WT	eap1∆
YBR035C	13	11	514.26	0.00560709	0.0304513	1.54126	WT	eap1∆
YJR042W	5	1	60.55	0.00560741	0.0304513	8.69347	WT	eap1∆
YPR188C	3	3	67.4	0.00565215	0.0306093	1.62155	eap1∆	WT
YMR128W	14	6	178.33	0.00576705	0.0311452	1.24697	eap1∆	WT
YBR248C	27	20	1152.46	0.00580005	0.0312271	1.35959	WT	eap1∆
YMR009W	2	2	105.28	0.00581416	0.0312271	2.02239	eap1∆	WT
YGR130C	23	13	553.41	0.00596717	0.0318811	2.05649	eap1∆	WT
YLL026W	39	32	1643.11	0.00596853	0.0318811	1.56439	eap1∆	WT
YLL018C	31	28	1523.78	0.0060537	0.0322479	1.3438	WT	eap1∆
YGL011C	16	13	592.49	0.00608706	0.0323375	1.20671	eap1∆	WT
YJL172W	11	10	292.54	0.00624592	0.0330915	1.8012	WT	eap1∆
YMR170C	7	3	234.44	0.00635043	0.0335543	1.70505	WT	eap1∆
YJL158C	3	1	141.52	0.00638176	0.033629	1.90722	WT	eap1∆
YLR330W	14	12	462.15	0.00654334	0.0343877	1.48097	eap1∆	WT
YER049W	14	9	370.14	0.00657914	0.0343964	1.64344	WT	eap1∆
YIR036C	5	4	178.14	0.00658018	0.0343964	1.92127	eap1∆	WT
YBR072W	11	10	734.56	0.00661064	0.0344635	3.59813	WT	eap1∆
YDL171C	53	39	1797.4	0.00674769	0.0349795	1.64817	WT	eap1∆
YMR291W	6	2	56.95	0.00675668	0.0349795	14.1696	eap1∆	WT
YNL096C	18	7	648.36	0.0067633	0.0349795	1.27673	eap1∆	WT
YGR233C	11	3	109.66	0.00698371	0.035958	31.1077	eap1∆	WT
YAR007C	9	8	189.93	0.00699254	0.035958	1.33326	eap1∆	WT
YGL049C	10	3	213.55	0.00700768	0.035958	1.56467	eap1∆	WT
YBR256C	9	9	344.77	0.0071115	0.0363952	2.22165	WT	eap1∆
YGR189C	5	3	207.09	0.00715502	0.0364548	2.21121	eap1∆	WT
YNL135C	9	7	482.23	0.00716044	0.0364548	1.22976	WT	eap1∆
YPR108W	11	9	340.83	0.00718577	0.0364888	1.39104	eap1∆	WT
YJR143C	4	4	107.78	0.00721845	0.0365598	1.7665	eap1∆	WT
YFR047C	4	2	140.47	0.00730106	0.0368826	1.44308	WT	eap1∆
YML117W	9	1	66.64	0.00734707	0.0369488	3.33795	eap1∆	WT
YPL032C	7	5	110.36	0.00735196	0.0369488	1.49176	eap1∆	WT
YGR147C	2	2	16.2	0.00746005	0.0373959	2.94084	eap1∆	WT
YOR303W	9	5	284.2	0.0076664	0.0382642	2.01734	WT	eap1∆
YPL249C	6	2	106.33	0.00767241	0.0382642	1.69444	eap1∆	WT
YOR185C	11	8	474.55	0.00772299	0.0383636	1.2937	WT	eap1∆
YHR018C	19	14	888.07	0.00773159	0.0383636	2.04603	WT	eap1∆
YDR023W	34	28	1627.88	0.00779497	0.0385802	1.12632	WT	eap1∆
YKL126W;YMR104C	6	4	134.37	0.00782553	0.0386332	1.81719	eap1∆	WT
YER012W	6	4	235.91	0.007847	0.0386332	1.35188	eap1∆	WT
YBR010W	3	2	81.1	0.00786496	0.0386332	17.0546	eap1∆	WT
YDR170C	23	15	483.96	0.00792009	0.0388065	2.04019	eap1∆	WT
YGL055W	9	6	265.69	0.00814012	0.0397848	1.60827	eap1∆	WT
YNL274C	6	2	105.73	0.00826336	0.0402865	1.73136	WT	eap1∆
YOR112W	7	2	49.24	0.00845391	0.0411129	18.071	eap1∆	WT
YOR124C	7	3	75.67	0.00851304	0.0412977	1.35308	WT	eap1∆
YKR006C	2	2	52.4	0.00855319	0.0413898	1.58377	WT	eap1∆
YMR215W	8	6	284.56	0.00860289	0.0415275	1.58057	WT	eap1∆
YBR288C	4	2	97.18	0.0087157	0.0419684	1.55353	eap1∆	WT
YKL085W	17	14	776.47	0.00878757	0.0422106	1.38654	WT	eap1∆
YML100W	23	19	573.02	0.00918917	0.0440314	2.36217	eap1∆	WT
YFL048C	5	2	150.56	0.00924578	0.0441944	1.44469	WT	eap1∆
YJR014W	4	2	116.98	0.00938928	0.0447708	1.22018	WT	eap1∆
YNL102W	13	4	63.98	0.00952748	0.0452575	2.19156	eap1∆	WT
YMR196W	8	4	102.57	0.00953764	0.0452575	1.58524	WT	eap1∆
YPR191W	17	9	625.94	0.00959043	0.0453978	1.54934	WT	eap1∆
YOL041C	14	7	205.03	0.00962207	0.0454375	1.39906	WT	eap1∆
YDL132W	8	4	151.92	0.00974994	0.0457413	2.02609	eap1∆	WT
YNR001C	12	10	667.4	0.00975545	0.0457413	1.31114	WT	eap1∆
YOR375C	25	15	1776.25	0.00975659	0.0457413	1.22827	WT	eap1∆
YFR053C	22	17	1107.57	0.00986084	0.0461195	1.59752	eap1∆	WT
YDL185W	60	53	2885.56	0.00996665	0.0465031	1.34863	WT	eap1∆
YMR012W	34	26	1325.89	0.0100149	0.0466171	1.35766	eap1∆	WT
YEL056W	4	3	56.27	0.0100589	0.0466198	1.76883	WT	eap1∆
YJL128C	3	1	26.14	0.0100632	0.0466198	1.69529	eap1∆	WT
YJL076W	10	4	212.89	0.0102029	0.0471552	1.42487	WT	eap1∆
YMR031C	22	10	538.06	0.0102729	0.0473667	1.72638	eap1∆	WT
YLR460C	5	2	108.31	0.010303	0.0473937	5.05573	eap1∆	WT
YOR122C	4	4	279.09	0.0104789	0.0480525	1.46062	WT	eap1∆
YDR381W	10	4	375.11	0.0104954	0.0480525	1.42653	WT	eap1∆
YAR075W	5	1	211.03	0.0107566	0.0491337	2.42212	eap1∆	WT
YMR216C	4	3	94	0.0112186	0.0509265	1.78227	eap1∆	WT
YPL160W	48	44	2010.61	0.0112227	0.0509265	1.18461	WT	eap1∆
YDL135C	5	5	181.69	0.0112393	0.0509265	1.23748	WT	eap1∆
YIL065C	2	1	23.5	0.0112533	0.0509265	78.9676	WT	eap1∆
YGL187C	3	3	90.3	0.011403	0.0514645	1.48821	WT	eap1∆
YPL145C	12	10	397.35	0.0114249	0.0514645	1.40119	WT	eap1∆
YML052W	4	2	100.27	0.0114684	0.0515418	3.95145	WT	eap1∆
YJR093C	1	1	34.24	0.011559	0.0518298	1.65181	eap1∆	WT
YLR397C	9	5	120.09	0.0116212	0.0519897	2.35949	eap1∆	WT
YLR028C	23	13	1082.24	0.0118232	0.0527726	1.32852	WT	eap1∆
YNL085W	5	3	117.11	0.0118644	0.0528359	2.72531	WT	eap1∆
YNL010W	11	9	415.31	0.0121643	0.0540482	1.26651	WT	eap1∆
YHR051W	4	4	208.7	0.0122432	0.0542754	1.99971	WT	eap1∆
YDL064W	3	1	23.57	0.0124212	0.0549398	1.2771	eap1∆	WT
YFR006W	10	6	124.46	0.0128788	0.0568355	1.37457	eap1∆	WT
YLR209C	6	5	140.02	0.0131647	0.0579662	1.21375	WT	eap1∆
YDR127W	68	53	2630.57	0.0133948	0.0587831	1.11058	eap1∆	WT
YAR042W	14	6	112.86	0.0134104	0.0587831	1.81677	eap1∆	WT
YBR207W	2	1	51.21	0.013675	0.0596851	2.15944	WT	eap1∆
YNL275W	4	2	32.53	0.0136772	0.0596851	2.96194	eap1∆	WT
YCL017C	7	4	103.28	0.0139254	0.0606328	1.44138	WT	eap1∆
YLR178C	6	6	189.93	0.0140572	0.0610709	1.64281	WT	eap1∆
YDR502C	24	11	1313.02	0.0141317	0.0612582	1.32752	WT	eap1∆
YJL186W	6	4	187.52	0.0142138	0.061478	1.59124	eap1∆	WT
YDR050C	21	18	1358.12	0.0142952	0.0616933	1.25525	WT	eap1∆
YBR053C	9	7	228.13	0.0144417	0.0621874	1.31689	eap1∆	WT
YBL050W	12	11	373.59	0.0144957	0.0621874	1.2714	WT	eap1∆
YCL059C	8	5	136.02	0.0145051	0.0621874	1.37054	WT	eap1∆
YDR300C	5	5	176.35	0.0145939	0.0624312	1.1138	WT	eap1∆
YNL015W	4	3	191.81	0.0146459	0.0625168	1.22952	WT	eap1∆
YHR113W	7	5	110.34	0.0148145	0.0630989	1.24871	eap1∆	WT
YNL231C	12	7	268.91	0.0150337	0.06376	1.57298	WT	eap1∆
YMR099C	21	16	823.06	0.0150634	0.06376	1.14829	WT	eap1∆
YDL130W	2	2	171.16	0.0150676	0.06376	1.24742	eap1∆	WT
YPR062W	6	6	270.93	0.0151207	0.0638464	1.29881	WT	eap1∆
YHR112C	7	4	75.74	0.015187	0.0639884	1.47243	WT	eap1∆
YNL220W	22	20	1040.13	0.0153732	0.0646334	1.21354	WT	eap1∆
YNL281W	4	4	239.61	0.0157196	0.0658658	1.20427	WT	eap1∆
YHR141C	5	3	148.02	0.0157337	0.0658658	1.62398	eap1∆	WT
YGR001C	4	3	130.08	0.0158597	0.0662514	1.24785	WT	eap1∆
YGL213C	3	2	69.38	0.0159613	0.0665338	1.36732	eap1∆	WT
YJL001W	11	7	398.92	0.0160659	0.0666855	1.3224	WT	eap1∆
YHL021C	9	9	275.68	0.0160659	0.0666855	1.45727	WT	eap1∆
YGR061C	58	50	2725.29	0.0161017	0.0666923	1.12949	eap1∆	WT
YNL180C	4	4	64.01	0.016392	0.0676954	1.28852	eap1∆	WT
YPL094C	3	2	30.41	0.0164745	0.0676954	1.51517	eap1∆	WT
YJR060W	4	2	130.56	0.0164796	0.0676954	1.49102	eap1∆	WT
YDL095W	9	5	103.04	0.0164895	0.0676954	1.50927	WT	eap1∆
YBR126C	18	14	643.62	0.0165578	0.0676954	1.33282	WT	eap1∆
YPL178W	5	2	97.66	0.0165597	0.0676954	1.52413	eap1∆	WT
YLR044C	42	32	3404.59	0.0165891	0.0676954	1.3225	WT	eap1∆
YBR026C	10	5	268.74	0.0166209	0.0676954	1.2146	WT	eap1∆
YDR381C-A	2	2	31.57	0.0168315	0.0683912	3.48877	eap1∆	WT
YOR341W	28	17	766.91	0.0168617	0.0683912	1.37678	eap1∆	WT
YPR163C	26	24	876.8	0.0170989	0.0692099	1.28943	WT	eap1∆
YBR109C	8	7	573.99	0.0175341	0.0708168	1.27642	WT	eap1∆
YGR118W	11	10	362.75	0.0175684	0.0708168	1.25915	WT	eap1∆
YDL116W	3	1	39.45	0.0177489	0.0713034	4.3589	eap1∆	WT
YPR028W	3	2	38.64	0.017762	0.0713034	2.07406	WT	eap1∆
YER178W	24	18	798.4	0.0178536	0.0713795	1.64709	WT	eap1∆
YNR067C	4	3	98.99	0.017854	0.0713795	2.21077	eap1∆	WT
YFR052W	9	8	307.21	0.0181264	0.0723205	1.27692	eap1∆	WT
YLR438W	17	15	612.44	0.0181686	0.0723413	2.03433	WT	eap1∆
YDR388W	11	8	284.53	0.0182638	0.0725726	1.49942	eap1∆	WT
YAL023C	10	7	342.29	0.0183584	0.0728006	1.92055	WT	eap1∆
YPL234C	1	1	30.27	0.018475	0.0731146	2.18021	WT	eap1∆
YKL009W	9	5	300.24	0.018768	0.074124	1.34628	WT	eap1∆
YFR024C-A	4	1	122.17	0.0191956	0.07566	1.70806	WT	eap1∆
YHR183W	32	20	1652.72	0.0193132	0.0759555	1.25821	WT	eap1∆
YMR130W	6	4	61.68	0.0193483	0.0759555	1.93423	WT	eap1∆
YDL078C	7	3	209.85	0.0195699	0.0766718	2.23331	WT	eap1∆
YKL117W	5	5	288.17	0.0196174	0.0767039	1.20167	WT	eap1∆
YNL113W	6	5	260.49	0.019678	0.0767876	1.40454	WT	eap1∆
YER019C-A	3	3	69.76	0.0197374	0.0768656	2.16805	eap1∆	WT
YLR262C-A	4	3	106.16	0.0199912	0.0776996	1.37345	WT	eap1∆
YMR083W	13	7	436.56	0.0201909	0.0783197	1.36838	WT	eap1∆
YGL201C	8	3	187.2	0.0203217	0.078671	6.6205	eap1∆	WT
YBR286W	13	10	471.37	0.0204902	0.0791667	1.26628	WT	eap1∆
YML106W;YMR271C	11	7	623.26	0.0206548	0.0795108	1.27631	WT	eap1∆
YER103W	28	11	1321.4	0.0206606	0.0795108	1.45873	WT	eap1∆
YOR133W	68	57	4253.77	0.02095	0.0804661	1.18575	WT	eap1∆
YDR174W	6	4	184.22	0.0210687	0.0807309	1.46359	WT	eap1∆
YIL162W	2	2	28.45	0.0211015	0.0807309	1.44769	WT	eap1∆
YDL166C	3	2	89.06	0.0211753	0.080811	2.36936	eap1∆	WT
YLR206W	4	1	70.64	0.0212051	0.080811	1.60539	WT	eap1∆
YPL260W	11	6	218.47	0.0214153	0.0814533	1.32429	eap1∆	WT
YLR328W	3	2	103.23	0.0219239	0.0832256	1.56385	eap1∆	WT
YML036W	6	3	184.16	0.0220037	0.0833666	1.67267	eap1∆	WT
YMR079W	15	14	559.4	0.0222025	0.0839572	1.26553	WT	eap1∆
YAL016W	12	8	247.76	0.0225107	0.0849585	1.56586	eap1∆	WT
YPL120W	4	1	37.26	0.0229541	0.0864649	1.76167	eap1∆	WT
YDR150W	16	6	196.61	0.0232319	0.087343	3.33114	eap1∆	WT
YNL216W	7	5	130.2	0.0234269	0.0877546	1.57279	eap1∆	WT
YKL013C	5	4	123.07	0.0234312	0.0877546	1.31325	eap1∆	WT
YKR046C	5	1	148.63	0.0236182	0.0882859	2.17455	WT	eap1∆
YBR169C	19	5	680.34	0.0236842	0.0883214	1.91086	WT	eap1∆
YDL092W	2	2	93.48	0.0237443	0.0883214	1.17732	eap1∆	WT
YGL043W	10	7	305.28	0.0237632	0.0883214	1.35627	WT	eap1∆
YML010W	20	15	535.76	0.0239219	0.0885495	1.29271	eap1∆	WT
YCL050C	12	12	483.18	0.0239287	0.0885495	1.21461	WT	eap1∆
YER110C	29	26	1534.23	0.0239604	0.0885495	1.1871	WT	eap1∆
YKR002W	5	1	43.63	0.0241535	0.0890947	1.30645	eap1∆	WT
YGL232W	10	5	252.84	0.024312	0.0895104	1.26992	WT	eap1∆
YML124C	14	11	506.66	0.0244246	0.0896361	1.36702	WT	eap1∆
YPL265W	6	5	110.36	0.0244463	0.0896361	1.5116	eap1∆	WT
YMR272C	5	3	53.46	0.0244837	0.0896361	1.7004	eap1∆	WT
YLR301W	12	9	541.36	0.0246225	0.0899758	1.26536	WT	eap1∆
YLR035C	6	3	28.8	0.02475	0.090273	1.4492	eap1∆	WT
YDR045C	1	1	35.97	0.0252126	0.0917889	1.36009	WT	eap1∆
YOR294W	2	2	93.94	0.025324	0.092023	1.42437	WT	eap1∆
YER004W	5	3	63.57	0.0253773	0.0920456	1.64148	WT	eap1∆
YDL053C	1	1	73.55	0.0254573	0.0921649	1.5693	eap1∆	WT
YMR095C	5	4	101.11	0.0258465	0.0934009	2.35963	WT	eap1∆
YDR070C	2	2	22.44	0.025929	0.0935262	3.15145	WT	eap1∆
YBR244W	6	3	221.56	0.0259867	0.0935616	1.49478	WT	eap1∆
YPL010W	5	3	134.4	0.0261057	0.0938173	1.4254	eap1∆	WT
YGL100W	3	3	71.56	0.0263546	0.0945382	1.46673	eap1∆	WT
YDR213W	9	3	45.13	0.0265989	0.0952396	1.49839	eap1∆	WT
YER148W	4	1	46.08	0.0267769	0.0956138	7.80886	WT	eap1∆
YHR164C	14	2	64.86	0.0268012	0.0956138	2.64325	eap1∆	WT
YGR184C	13	7	123.36	0.0273424	0.0972328	15.6376	eap1∆	WT
YHR037W	10	9	188.89	0.0273545	0.0972328	1.37021	WT	eap1∆
YMR024W	4	2	41.7	0.0274492	0.0973924	1.86877	WT	eap1∆
YOR270C	14	10	697.6	0.0277672	0.0983422	1.94283	WT	eap1∆
YMR308C	9	7	238.39	0.0280414	0.0990272	1.31126	eap1∆	WT
YPR019W	4	2	77.53	0.0280619	0.0990272	4.55133	eap1∆	WT
YGR185C	21	14	804.06	0.0283495	0.0998617	1.19161	WT	eap1∆
YOL061W	10	8	302.85	0.0287041	0.100929	1.19115	WT	eap1∆
YBR151W	3	2	84.02	0.0287611	0.100948	1.58825	WT	eap1∆
YJR049C	4	2	47.81	0.0290773	0.101756	2.12865	WT	eap1∆
YOR020C	7	3	378.22	0.0290954	0.101756	1.25175	eap1∆	WT
YLR043C	11	6	533.47	0.0291798	0.101869	1.2749	WT	eap1∆
YPR091C	6	5	66.74	0.0292831	0.102047	1.41034	WT	eap1∆
YOL057W	13	8	237.61	0.0296653	0.103195	1.1366	eap1∆	WT
YDR361C	7	5	141.67	0.0298869	0.103781	1.5427	eap1∆	WT
YLR180W	22	9	1200.74	0.0304822	0.105494	1.22211	WT	eap1∆
YLR106C	54	28	1024.91	0.0304879	0.105494	1.75938	eap1∆	WT
YGR167W	11	8	397.97	0.0306844	0.105889	1.68103	eap1∆	WT
YHR143W-A	2	1	119.51	0.0307105	0.105889	1.20702	eap1∆	WT
YDR519W	8	5	262.31	0.0311982	0.107381	1.30943	WT	eap1∆
YGR264C	30	25	1093.44	0.0312702	0.10744	1.15389	WT	eap1∆
YDR483W	10	9	290.27	0.0315824	0.108322	1.2478	WT	eap1∆
YGL256W	3	3	46.11	0.0318285	0.108975	1.70571	WT	eap1∆
YJL111W	15	11	592.91	0.0318852	0.108978	1.25774	eap1∆	WT
YPL028W	20	17	1119.52	0.0319596	0.109042	1.13153	WT	eap1∆
YGR267C	9	8	321.22	0.0328215	0.111788	1.68423	WT	eap1∆
YEL019C	2	2	20.15	0.0329878	0.112073	1.65123	eap1∆	WT
YIL145C	4	3	69.8	0.0330201	0.112073	1.97992	eap1∆	WT
YCR075W-A	2	1	25.24	0.0331691	0.112384	2.40277	WT	eap1∆
YGR009C	6	2	105.56	0.0333013	0.112597	1.60797	WT	eap1∆
YLR429W	18	14	552.34	0.0333472	0.112597	1.39477	WT	eap1∆
YNR035C	8	8	329.38	0.0336686	0.113487	1.17907	eap1∆	WT
YJL167W	14	7	684.69	0.033791	0.113651	1.28846	WT	eap1∆
YBR177C	10	9	482.57	0.0338338	0.113651	1.59705	WT	eap1∆
YHR179W	22	18	1119.45	0.0340812	0.114068	1.53065	WT	eap1∆
YPR147C	3	2	30.96	0.0341097	0.114068	1.55076	eap1∆	WT
YGL014W	4	2	38.31	0.034133	0.114068	2.83492	eap1∆	WT
YLR380W	7	6	224.61	0.034198	0.11409	1.83336	WT	eap1∆
YLR257W	8	8	210.66	0.0344484	0.11473	1.40674	WT	eap1∆
YGL099W	15	8	204.01	0.0348952	0.116021	1.30024	eap1∆	WT
YDR354W	3	3	56.14	0.0349656	0.116057	1.7422	WT	eap1∆
YCL054W	15	7	158.78	0.0351986	0.11658	1.4488	eap1∆	WT
YPL228W	5	2	31.35	0.0352423	0.11658	1.82877	eap1∆	WT
YMR237W	7	3	83.09	0.0358987	0.118405	1.46575	WT	eap1∆
YDR238C	24	15	930.11	0.0359153	0.118405	1.21121	eap1∆	WT
YOR361C	29	24	979.67	0.0364122	0.119841	1.33619	eap1∆	WT
YGR123C	9	5	189.11	0.0366243	0.120337	1.38293	eap1∆	WT
YHR108W	6	4	204.83	0.0368941	0.120996	1.25239	eap1∆	WT
YLR457C	3	2	21.56	0.0369486	0.120996	1.49362	WT	eap1∆
YDL141W	4	2	29.82	0.0371918	0.121588	1.5707	WT	eap1∆
YNR034W	2	2	77.03	0.0373093	0.121625	1.46629	eap1∆	WT
YBR052C	3	3	126.73	0.0373272	0.121625	1.67918	eap1∆	WT
YKL046C	1	1	15.37	0.0374023	0.121666	3.74429	eap1∆	WT
YIL036W	5	2	44.81	0.0378814	0.12302	5.6999	WT	eap1∆
YIL074C	17	7	729.63	0.0382785	0.124104	1.23776	WT	eap1∆
YGR158C	3	3	73.47	0.0393246	0.12712	1.39907	WT	eap1∆
YHR047C	15	10	441.87	0.0393917	0.12712	1.2016	WT	eap1∆
YBL102W	3	1	131.7	0.0394102	0.12712	1.62358	WT	eap1∆
YOR095C	7	5	266.21	0.0394691	0.12712	1.28464	WT	eap1∆
YPR139C	1	1	45.78	0.0400176	0.128675	Inf	WT	eap1∆
YDR172W	18	13	485.28	0.0404002	0.129692	1.18636	eap1∆	WT
YKR039W	3	1	46.75	0.0404876	0.129759	Inf	WT	eap1∆
YKL058W	2	2	64.15	0.0406069	0.129929	2.1106	eap1∆	WT
YGR060W	1	1	45.1	0.0407979	0.130327	Inf	WT	eap1∆
YBR078W	3	3	205.66	0.0409568	0.130621	1.18586	WT	eap1∆
YGL253W	34	25	1761.14	0.0411146	0.130911	1.19641	WT	eap1∆
YPL063W	11	7	183.17	0.0415948	0.132224	1.4321	eap1∆	WT
YDR516C	8	6	265.8	0.0421924	0.133906	1.26926	WT	eap1∆
YDR408C	6	6	352.86	0.0422632	0.133913	1.50311	eap1∆	WT
YHR030C	4	2	48.19	0.0427	0.134956	3.17026	eap1∆	WT
YGR148C	10	3	486.41	0.0427302	0.134956	1.6332	WT	eap1∆
YDR097C	14	2	70.06	0.0433851	0.136803	2.37958	eap1∆	WT
YLL041C	1	1	43.6	0.0434801	0.136882	Inf	eap1∆	WT
YGL148W	14	12	580.43	0.0440086	0.13832	1.23707	WT	eap1∆
YKL218C	5	4	106.24	0.0440784	0.13832	1.88821	WT	eap1∆
YJR002W	10	3	132.51	0.0443779	0.138933	1.65172	WT	eap1∆
YKR092C	3	3	44.18	0.0444193	0.138933	1.45589	eap1∆	WT
YIL125W	17	14	409.78	0.044487	0.138933	1.19204	WT	eap1∆
YOR195W	11	4	98	0.0446307	0.139048	1.34912	eap1∆	WT
YGR033C	2	1	56.26	0.0446661	0.139048	2.28848	WT	eap1∆
YDL015C	5	2	68.45	0.0456498	0.141693	1.95855	eap1∆	WT
YHL011C	14	12	478.64	0.0456608	0.141693	1.18465	WT	eap1∆
YGL077C	1	1	63.09	0.046236	0.143251	2.81582	eap1∆	WT
YGR285C	22	18	857.05	0.0463323	0.143322	1.23613	WT	eap1∆
YNL153C	5	3	188.51	0.0464775	0.143326	1.15731	eap1∆	WT
YJL068C	6	5	224.74	0.0465774	0.143326	1.47492	eap1∆	WT
YJL136C	8	1	578.19	0.0466264	0.143326	1.71064	WT	eap1∆
YJL080C	54	44	2113.36	0.0466268	0.143326	1.10674	eap1∆	WT
YHR009C	7	6	227.52	0.0468499	0.143786	1.25916	eap1∆	WT
YMR261C	16	10	381.43	0.0469289	0.143802	1.21215	eap1∆	WT
YHR052W	7	3	217.83	0.0473276	0.144797	1.31695	WT	eap1∆
YML086C	11	8	331.59	0.047634	0.145507	1.68095	eap1∆	WT
YIL063C	9	5	180.1	0.0479903	0.146212	1.21849	WT	eap1∆
YDL122W	7	4	106.39	0.0480144	0.146212	1.25089	WT	eap1∆
YDL004W	2	1	20.83	0.0481939	0.146531	2.60974	WT	eap1∆
YCR051W	5	4	232.1	0.0487736	0.147843	1.22353	WT	eap1∆
YMR197C	4	2	146.38	0.0487769	0.147843	1.5387	eap1∆	WT
YPR058W	7	4	184.47	0.0489793	0.148066	2.02018	eap1∆	WT
YLR274W	6	2	61.24	0.0490019	0.148066	1.38992	eap1∆	WT
YHR174W	50	27	3951.49	0.0491645	0.148328	1.16124	WT	eap1∆
YMR241W	8	5	389.3	0.0496052	0.149427	1.41504	WT	eap1∆
YML004C	9	5	193.94	0.049688	0.149446	1.50379	WT	eap1∆
YLL024C	54	12	3788.76	0.0498526	0.149711	1.23683	eap1∆	WT
YCL057W	16	10	489.87	0.0500009	0.149926	1.18614	WT	eap1∆
YKL213C	8	4	101.02	0.050112	0.150029	2.141	WT	eap1∆
YJR144W	7	6	177.28	0.0505435	0.15109	1.56152	WT	eap1∆
YPR159W	6	5	216.04	0.0506258	0.151105	1.39176	eap1∆	WT
YJR072C	6	4	124.26	0.0507528	0.151253	1.24417	eap1∆	WT
YBR088C	11	9	477.99	0.0515352	0.153351	1.27345	eap1∆	WT
YBL026W	2	2	116.14	0.0519519	0.154314	1.2136	eap1∆	WT
YAR015W	21	12	947.1	0.0520363	0.154314	1.26388	eap1∆	WT
YDR533C	9	8	335.35	0.0520956	0.154314	1.80277	WT	eap1∆
YOR123C	4	3	129.94	0.0523441	0.154706	2.28575	eap1∆	WT
YMR305C	5	4	225.54	0.0524257	0.154706	1.48393	eap1∆	WT
YDL147W	14	6	327.88	0.0524654	0.154706	1.27203	eap1∆	WT
YDL084W	25	19	1027.3	0.0528636	0.155645	1.12283	WT	eap1∆
YEL055C	13	10	208.52	0.0533165	0.156742	1.3226	eap1∆	WT
YMR290C	8	6	231.08	0.0537055	0.157649	1.48937	WT	eap1∆
YEL011W	5	4	53.62	0.0539388	0.158097	13.8892	eap1∆	WT
YMR091C	2	2	53.07	0.0542261	0.158701	15.1538	eap1∆	WT
YGR209C	10	6	524.31	0.0543801	0.158914	1.31141	WT	eap1∆
YER068W	3	2	19.3	0.0544628	0.158918	1.31187	WT	eap1∆
YML103C	9	5	206	0.0546367	0.159158	1.65481	eap1∆	WT
YDR141C	15	3	90.6	0.0547079	0.159158	1.88338	WT	eap1∆
YGR048W	6	2	91.7	0.0547959	0.159177	1.65881	eap1∆	WT
YHR069C	5	4	166.39	0.0550914	0.159798	1.29232	eap1∆	WT
YMR116C	21	19	1314.38	0.0558791	0.161843	1.18631	WT	eap1∆
YHR200W	7	7	349.14	0.0559679	0.16186	1.22063	eap1∆	WT
YER043C	31	27	1700.62	0.0562927	0.162559	1.09697	WT	eap1∆
YBR022W	2	1	21.79	0.05673	0.16358	2.18048	eap1∆	WT
YDR497C	3	2	66.77	0.0570974	0.164397	1.62383	eap1∆	WT
YBL045C	18	15	563.91	0.0577037	0.165664	1.41892	WT	eap1∆
YDR292C	4	2	84.05	0.057707	0.165664	3.17222	WT	eap1∆
YKL056C	11	10	639.96	0.058056	0.166421	1.22022	WT	eap1∆
YML074C	4	3	148.53	0.0587758	0.168238	1.61652	WT	eap1∆
YDR212W	18	11	630.74	0.0591133	0.168711	1.85549	eap1∆	WT
YIL016W	1	1	24.81	0.0591137	0.168711	3.1241	WT	eap1∆
YMR306W	10	5	89.86	0.0604255	0.172204	2.73696	eap1∆	WT
YNL267W	5	1	69.73	0.0608659	0.173008	3.92485	eap1∆	WT
YCL037C	9	8	405.13	0.0610695	0.173008	1.11105	eap1∆	WT
YIL109C	15	11	422.14	0.0611343	0.173008	1.13095	WT	eap1∆
YML093W	7	3	42.04	0.0611481	0.173008	1.99753	eap1∆	WT
YNL007C	15	12	608.97	0.0611503	0.173008	1.26111	WT	eap1∆
YAL003W	17	13	849.4	0.062148	0.17546	1.78022	WT	eap1∆
YBR272C	7	2	56.82	0.0622248	0.17546	2.22076	eap1∆	WT
YML131W	4	3	55.29	0.0622861	0.17546	1.61898	WT	eap1∆
YPR148C	9	8	258.38	0.0624376	0.1756	1.14473	eap1∆	WT
YER010C	5	2	75.69	0.0625444	0.1756	1.31213	WT	eap1∆
YBL091C	8	4	190.16	0.0626051	0.1756	1.34969	WT	eap1∆
YLR017W	7	5	150.71	0.0628688	0.176087	1.23643	eap1∆	WT
YLR344W	13	2	572.12	0.0630426	0.176321	1.33031	WT	eap1∆
YHR024C	6	3	100.79	0.0635526	0.177493	1.49761	eap1∆	WT
YPL061W	37	32	2272.85	0.0637043	0.177663	1.12508	eap1∆	WT
YGR200C	6	6	160.64	0.0643045	0.179082	1.23155	eap1∆	WT
YML127W	6	4	49.05	0.0648367	0.179814	1.24721	WT	eap1∆
YOL139C	11	7	565.2	0.0648373	0.179814	1.19535	WT	eap1∆
YOR197W	6	6	208.37	0.0648435	0.179814	1.26206	eap1∆	WT
YKL053C-A	2	2	36.11	0.0652188	0.180599	1.38793	eap1∆	WT
YDL108W	4	1	57.73	0.0657111	0.181564	1.64921	eap1∆	WT
YKL207W	2	1	80.33	0.0657532	0.181564	137.136	WT	eap1∆
YHR049W	10	9	263.94	0.0659398	0.181817	1.32503	WT	eap1∆
YMR295C	3	3	60.48	0.0660993	0.181817	1.57282	WT	eap1∆
YOR074C	6	4	154	0.0661238	0.181817	1.8632	eap1∆	WT
YNL121C	21	13	630.59	0.0662676	0.181928	1.37527	WT	eap1∆
YHR094C	8	4	157.91	0.0663502	0.181928	1.22049	WT	eap1∆
YKR070W	4	3	106.01	0.0685311	0.187645	1.30979	WT	eap1∆
YJR064W	18	14	616.62	0.0687496	0.18798	1.12016	eap1∆	WT
YFL034C-A	5	2	135.17	0.0689616	0.188296	1.30827	WT	eap1∆
YER177W	20	5	1233.31	0.0698177	0.190368	1.15264	WT	eap1∆
YNL108C	8	7	162.53	0.0701333	0.190962	1.22239	WT	eap1∆
YGL245W	47	33	1934.2	0.0705443	0.191814	1.0943	WT	eap1∆
YMR072W	8	5	152.26	0.0707559	0.192088	1.20675	WT	eap1∆
YNL209W	40	1	2959.32	0.0708416	0.192088	1.16824	eap1∆	WT
YFR033C	1	1	34.06	0.0710119	0.192283	2.14532	WT	eap1∆
YOR016C	4	1	87.64	0.071347	0.192923	3.99595	WT	eap1∆
YNL244C	9	7	287.28	0.0727324	0.196378	1.12653	WT	eap1∆
YCR030C	4	4	154.35	0.0728254	0.196378	1.75201	eap1∆	WT
YDR469W	2	1	74.36	0.0733821	0.197606	1.36869	WT	eap1∆
YIL062C	4	3	151.05	0.0736826	0.198142	1.67736	eap1∆	WT
YDL065C	3	1	30.18	0.0742523	0.1994	2.53339	eap1∆	WT
YKL121W	4	2	24.56	0.0747128	0.200124	1.39905	WT	eap1∆
YML035C	9	5	139.7	0.0747634	0.200124	1.273	eap1∆	WT
YFR016C	12	5	151.36	0.0748289	0.200124	1.52861	eap1∆	WT
YMR247C	12	7	204.91	0.0750866	0.200539	1.57225	eap1∆	WT
YLR083C	4	4	176.29	0.075385	0.201061	1.24963	eap1∆	WT
YOL098C	12	7	180.47	0.0757677	0.201806	1.26998	eap1∆	WT
YOR039W	4	3	90.38	0.0761718	0.202607	1.79223	WT	eap1∆
YHR163W	9	8	353.88	0.0764899	0.203176	1.32848	WT	eap1∆
YOR181W	7	2	69.53	0.0769028	0.203996	4.44888	eap1∆	WT
YGL106W	7	5	303.67	0.077174	0.204228	1.18359	WT	eap1∆
YGR128C	9	5	244.9	0.0772464	0.204228	1.36003	eap1∆	WT
YIL126W	16	4	121.51	0.0773138	0.204228	5.18907	eap1∆	WT
YOR226C	4	2	77.61	0.0774502	0.204228	4.50435	WT	eap1∆
YIL044C	1	1	52.63	0.0775461	0.204228	4.96847	eap1∆	WT
YMR178W	7	4	212.58	0.0776172	0.204228	1.31348	eap1∆	WT
YDR001C	13	7	276.82	0.0780044	0.204936	1.50212	eap1∆	WT
YJR004C	3	3	68.99	0.0781382	0.204936	1.73052	WT	eap1∆
YNL134C	16	14	1036.24	0.0782935	0.204936	1.18594	eap1∆	WT
YFL017C	3	2	47.27	0.0783054	0.204936	1.27449	WT	eap1∆
YGL197W	12	1	113.4	0.0786651	0.205602	1.34211	WT	eap1∆
YPL263C	9	6	283.19	0.0787838	0.205637	1.37517	eap1∆	WT
YOR116C	8	4	126.8	0.0791993	0.206446	3.50018	WT	eap1∆
YJR009C	35	6	2131.41	0.0794035	0.206703	1.42611	WT	eap1∆
YPL232W	4	2	61.76	0.0802314	0.208268	1.18669	eap1∆	WT
YIR004W	5	1	84.04	0.080266	0.208268	1.43918	eap1∆	WT
YDR454C	11	6	588.61	0.0803243	0.208268	1.27373	WT	eap1∆
YJL140W	3	3	104.56	0.0805519	0.208382	1.16912	WT	eap1∆
YHL001W;YKL006W	13	6	659.53	0.0805815	0.208382	1.30722	WT	eap1∆
YDR378C	4	4	179.32	0.0807526	0.208549	1.134	WT	eap1∆
YDL173W	2	2	61.21	0.0809279	0.208699	1.38001	WT	eap1∆
YEL032W	9	4	112.32	0.0810242	0.208699	1.15859	eap1∆	WT
YDR399W	14	13	496.73	0.0812823	0.209041	1.17607	WT	eap1∆
YPR118W	9	7	268.85	0.0813711	0.209041	1.18181	eap1∆	WT
YMR075W	9	1	84.45	0.0815011	0.209101	1.41738	WT	eap1∆
YJL174W	1	1	15.49	0.0819228	0.209907	1.61979	eap1∆	WT
YOR217W	8	2	83.72	0.0820604	0.209984	2.12338	eap1∆	WT
YJL214W	2	1	20.17	0.0822638	0.21023	1.82251	eap1∆	WT
YLR109W	15	14	913.02	0.0829538	0.211691	1.25298	WT	eap1∆
YOR085W	3	2	51.33	0.0831188	0.211691	2.51574	eap1∆	WT
YHR158C	15	10	161.67	0.0832729	0.211691	2.63973	eap1∆	WT
YGR074W	2	2	55.57	0.0832866	0.211691	1.6019	WT	eap1∆
YER156C	13	8	362.17	0.0833771	0.211691	1.17602	WT	eap1∆
YJL184W	5	4	137.92	0.0837042	0.211985	1.24166	eap1∆	WT
YOR362C	9	8	252.13	0.0837096	0.211985	1.30957	WT	eap1∆
YDR324C	11	5	154.7	0.0843728	0.21282	1.79542	eap1∆	WT
YLR231C	7	6	128.05	0.0844526	0.21282	1.43333	WT	eap1∆
YMR125W	14	10	335.23	0.0844577	0.21282	1.57916	eap1∆	WT
YDR517W	4	3	60.1	0.0844748	0.21282	1.26405	eap1∆	WT
YMR307W	8	8	529.44	0.0853526	0.214755	1.09759	eap1∆	WT
YBR089C-A	3	1	75.17	0.0858672	0.215772	1.31953	eap1∆	WT
YGR078C	4	1	94.1	0.0867521	0.217715	1.41072	eap1∆	WT
YER134C	4	2	53.22	0.0871855	0.218523	2.28926	eap1∆	WT
YOR153W	16	9	477.72	0.0876713	0.219459	1.45022	WT	eap1∆
YDR211W	11	9	251.43	0.0890806	0.222701	1.46497	eap1∆	WT
YIL052C	5	2	199.98	0.0893508	0.223092	1.14422	eap1∆	WT
YNL160W	5	5	217.64	0.0896532	0.223478	1.52484	WT	eap1∆
YBR111C	6	6	183.62	0.0897343	0.223478	1.23524	WT	eap1∆
YDR457W	27	11	299.53	0.0899017	0.22361	1.29507	eap1∆	WT
YDR135C	11	4	177.36	0.0901881	0.224038	1.66837	WT	eap1∆
YOR171C	2	1	60.82	0.0904772	0.224339	1.3356	WT	eap1∆
YDR144C	3	2	32.36	0.0905389	0.224339	1.25688	WT	eap1∆
YMR300C	23	19	768.97	0.0906801	0.224405	1.10998	WT	eap1∆
YJL082W	6	3	80.31	0.0915783	0.226341	1.57499	WT	eap1∆
YKL069W	4	2	54.42	0.0929516	0.229352	1.40963	eap1∆	WT
YGL020C	1	1	65.52	0.0930313	0.229352	6.56561	WT	eap1∆
YBR221C	9	8	450.65	0.0932346	0.229564	1.46674	WT	eap1∆
YHR192W	1	1	25.2	0.0934522	0.22981	7.93845	WT	eap1∆
YGL156W	6	4	74.02	0.0942435	0.231236	1.81338	WT	eap1∆
YDL192W	13	2	714.79	0.0942686	0.231236	1.35674	WT	eap1∆
YHR216W	15	2	899.2	0.0949066	0.232351	1.45736	WT	eap1∆
YKL018W	1	1	25.04	0.0949608	0.232351	1.80726	eap1∆	WT
YOR137C	6	4	39.24	0.0951825	0.232602	1.93911	eap1∆	WT
YNL183C	6	3	58.97	0.0953348	0.232684	4.94915	eap1∆	WT
YMR183C	5	3	145.43	0.0958766	0.233714	1.23398	eap1∆	WT
YMR058W	6	6	109.87	0.0960507	0.233847	1.30066	WT	eap1∆
YER089C	10	6	346.13	0.0966988	0.235132	1.12033	eap1∆	WT
YGL013C	4	2	51	0.0971971	0.23605	1.94792	WT	eap1∆
YMR222C	1	1	29.74	0.0974438	0.23611	1.53044	eap1∆	WT
YPL262W	17	12	622.37	0.0974634	0.23611	1.23264	WT	eap1∆
YFR030W	26	20	826.64	0.0987929	0.239035	1.54007	WT	eap1∆
YCL025C	5	1	38.85	0.0995638	0.240483	4.0973	eap1∆	WT
YIR012W	3	1	55.63	0.0996488	0.240483	2.16083	WT	eap1∆
YNR033W	7	1	44.38	0.099797	0.240483	3.04074	eap1∆	WT
YDL208W	4	3	86.03	0.0998834	0.240483	1.49421	WT	eap1∆
YNR021W	8	4	165.7	0.100314	0.241222	1.60984	eap1∆	WT
YGR005C	4	1	50.18	0.101178	0.243	2.64013	eap1∆	WT
YOR175C	5	2	71.29	0.101302	0.243	1.58726	WT	eap1∆
YBR046C	8	6	222.56	0.102388	0.245305	1.38744	WT	eap1∆
YCL030C	48	39	2525.89	0.10287	0.246039	1.31213	WT	eap1∆
YLR197W	15	14	715.94	0.102946	0.246039	1.13163	WT	eap1∆
YOL012C	4	1	125.07	0.10357	0.246981	1.90163	eap1∆	WT
YKL179C	9	3	78.26	0.103593	0.246981	1.50473	eap1∆	WT
YDR465C	4	2	60.5	0.103799	0.247171	1.636	WT	eap1∆
YAL029C	8	1	112.67	0.104331	0.248136	2.03631	eap1∆	WT
YDR214W	15	12	444.56	0.104505	0.248247	1.2477	eap1∆	WT
YPR103W	8	7	272.7	0.104993	0.249104	1.18466	WT	eap1∆
YKL127W	13	11	399.64	0.105238	0.249382	1.1658	eap1∆	WT
YNL229C	5	3	97.5	0.105624	0.249993	1.14676	WT	eap1∆
YMR105C	9	7	297.05	0.106109	0.250838	1.39938	WT	eap1∆
YLR074C	1	1	44.2	0.106407	0.251239	1.30711	eap1∆	WT
YPR010C-A	1	1	33.39	0.107083	0.252531	1.39834	WT	eap1∆
YFR032C-A	2	1	19.88	0.107626	0.253505	2.04544	eap1∆	WT
YDR511W	2	1	21.66	0.108183	0.254511	1.7625	eap1∆	WT
YJL124C	4	3	32.44	0.108518	0.254991	1.52813	eap1∆	WT
R0020C	4	2	73.98	0.108668	0.255037	2.36532	eap1∆	WT
YML017W	8	5	133.7	0.109275	0.256012	1.32942	eap1∆	WT
YMR278W	10	3	46.63	0.109481	0.256012	1.4983	eap1∆	WT
YNL148C	6	1	50.89	0.109605	0.256012	1.46951	WT	eap1∆
YJL121C	7	6	207.14	0.109607	0.256012	1.2335	WT	eap1∆
YPR129W	5	5	237.11	0.11022	0.257136	1.16091	WT	eap1∆
YOL149W	1	1	64.57	0.110393	0.257232	2.85042	eap1∆	WT
YPR113W	6	3	77.06	0.111222	0.258856	1.68744	WT	eap1∆
Q0250	3	2	53.23	0.111931	0.260195	2.29145	eap1∆	WT
YCR004C	8	5	267.97	0.112245	0.260616	1.44251	eap1∆	WT
YOR234C	8	2	415.14	0.112487	0.260869	1.16371	eap1∆	WT
YCL018W	4	3	66.57	0.112681	0.261009	4.92426	WT	eap1∆
YOL038W	8	6	282.21	0.11302	0.261484	1.34447	WT	eap1∆
YOR131C	5	2	31.47	0.113155	0.261488	1.49672	WT	eap1∆
YIL027C	4	3	91.46	0.113703	0.26226	4.18561	eap1∆	WT
YLR216C	21	16	608.95	0.113758	0.26226	1.14975	WT	eap1∆
YHR107C	12	8	230.88	0.114533	0.263737	1.33618	WT	eap1∆
YDR328C	8	6	249.81	0.115802	0.266345	1.24158	WT	eap1∆
YBL003C	4	2	153.97	0.116046	0.266593	1.21695	WT	eap1∆
YGR162W	23	16	620.27	0.116193	0.266616	1.07804	eap1∆	WT
YGL157W	15	10	388.4	0.116498	0.266679	1.13833	eap1∆	WT
YBR085W	6	1	86.41	0.116551	0.266679	10.7084	eap1∆	WT
YNL290W	2	2	101.28	0.116629	0.266679	1.45203	eap1∆	WT
YNL084C	5	3	140.93	0.117941	0.269364	1.45122	eap1∆	WT
YJL002C	6	6	143.69	0.118291	0.269848	1.49789	eap1∆	WT
YHR098C	7	5	180.64	0.118521	0.269888	1.63638	WT	eap1∆
YPR060C	8	6	183.23	0.118585	0.269888	1.28202	WT	eap1∆
YBR014C	2	2	28.74	0.119376	0.271091	1.14786	WT	eap1∆
YHR119W	8	1	83.48	0.119391	0.271091	4.69072	WT	eap1∆
YIL018W	17	14	786.17	0.119974	0.271928	1.1411	WT	eap1∆
YER048W-A	5	2	59.99	0.120038	0.271928	1.21051	WT	eap1∆
YCR088W	23	18	751.5	0.120267	0.272133	1.1593	eap1∆	WT
YDL213C	5	3	77.33	0.120482	0.272304	1.36304	WT	eap1∆
YOL021C	10	8	269.97	0.121146	0.273488	3.19272	eap1∆	WT
YDL029W	14	10	391.94	0.121889	0.274849	1.14602	eap1∆	WT
YDR372C	8	6	209.87	0.122762	0.276498	1.21076	WT	eap1∆
YPL143W	7	1	401.12	0.123632	0.278089	1.15765	eap1∆	WT
YKL197C	7	1	44.56	0.123953	0.278089	40.4448	eap1∆	WT
YGL234W	37	32	1842.94	0.124023	0.278089	1.07477	WT	eap1∆
YBL087C	13	9	593.67	0.124038	0.278089	1.33876	WT	eap1∆
YEL047C	20	13	683.74	0.124384	0.278546	1.29332	WT	eap1∆
YLL050C	11	11	651.29	0.124527	0.278547	1.09887	WT	eap1∆
YJL208C	1	1	15.85	0.125325	0.279495	11.5678	WT	eap1∆
YMR206W	2	1	19.12	0.125352	0.279495	1.4022	eap1∆	WT
YMR146C	14	13	728.16	0.12538	0.279495	1.07436	eap1∆	WT
YGL135W	13	11	729.27	0.125847	0.280218	1.133	WT	eap1∆
YLR324W	2	2	32.22	0.126889	0.282216	8.28516	eap1∆	WT
YDR054C	3	2	82.37	0.127215	0.282572	1.17393	WT	eap1∆
YPL127C	8	5	155.03	0.127381	0.282572	1.58747	eap1∆	WT
YCL001W	2	2	38.18	0.127536	0.282572	2.19499	eap1∆	WT
YMR173W	9	8	292.07	0.127745	0.282572	1.43116	WT	eap1∆
YLR225C	4	1	47.06	0.127772	0.282572	1.83815	eap1∆	WT
YKR080W	10	7	308.81	0.12801	0.282779	1.51171	eap1∆	WT
YOR142W	9	6	336.18	0.129232	0.285156	1.14746	WT	eap1∆
YBR176W	2	1	15.54	0.130056	0.286652	1.52596	WT	eap1∆
YMR229C	41	26	1058.67	0.130573	0.287466	1.28522	eap1∆	WT
YLR356W	2	2	45.48	0.130722	0.287471	2.84641	WT	eap1∆
YJL177W	12	1	844.62	0.131105	0.287791	1.25806	WT	eap1∆
YPR036W	16	13	467.37	0.131229	0.287791	1.13623	eap1∆	WT
YOL121C	15	8	633.29	0.131383	0.287791	1.11342	eap1∆	WT
YKL140W	1	1	41.47	0.131456	0.287791	2.46278	WT	eap1∆
YMR129W	6	3	45.88	0.131713	0.288029	1.3481	eap1∆	WT
YBR189W	15	1	772.63	0.132801	0.290085	1.12918	eap1∆	WT
YPL183C	14	5	122.51	0.133528	0.291347	1.39068	eap1∆	WT
YKR026C	3	2	78.66	0.134862	0.293929	2.18893	eap1∆	WT
YKR082W	7	3	89.32	0.135155	0.294241	1.42378	eap1∆	WT
YBR222C	8	3	171.11	0.135571	0.294818	1.42176	WT	eap1∆
YHR128W	9	5	331.03	0.136013	0.29545	1.24235	WT	eap1∆
YOR220W	5	3	151.16	0.136217	0.295566	1.28455	eap1∆	WT
YCR009C	13	8	269.03	0.136619	0.29611	1.16851	eap1∆	WT
YIL039W	1	1	16.68	0.138008	0.298787	8.29651	WT	eap1∆
YKR056W	6	2	80.95	0.138558	0.299646	1.23742	WT	eap1∆
YDL040C	26	20	754.08	0.139668	0.301713	1.18976	eap1∆	WT
YPR063C	1	1	19.22	0.139911	0.301778	2.44397	WT	eap1∆
YKR084C	10	8	106.66	0.140006	0.301778	1.15479	WT	eap1∆
YAL005C	50	12	3486.48	0.140365	0.302217	1.23911	eap1∆	WT
YIL137C	11	7	287.22	0.140749	0.302711	1.71934	eap1∆	WT
YHL015W	12	12	630.18	0.142682	0.306052	1.12959	eap1∆	WT
YFR037C	14	5	401.89	0.142739	0.306052	1.41064	eap1∆	WT
YPL019C	8	3	44.92	0.142772	0.306052	1.44672	WT	eap1∆
YIR026C	2	2	66.3	0.14444	0.309288	2.05792	WT	eap1∆
YBL101C	10	6	91.02	0.144794	0.309681	1.37233	eap1∆	WT
YNL138W	9	7	292.65	0.14494	0.309681	1.16632	eap1∆	WT
YGR244C	12	9	201.03	0.145138	0.309765	1.71562	eap1∆	WT
YKL001C	5	2	106.4	0.145547	0.310299	1.65521	WT	eap1∆
YPR080W	34	22	1762.15	0.146729	0.312477	1.27351	WT	eap1∆
YGL242C	6	4	141.37	0.147587	0.313964	1.18724	WT	eap1∆
YJL081C	2	1	47.08	0.148639	0.315857	2.53091	WT	eap1∆
YLR390W-A	3	3	52.94	0.148922	0.316116	1.36094	eap1∆	WT
YDL226C	16	11	370.63	0.14935	0.316356	1.13175	WT	eap1∆
YKL129C	22	4	287.05	0.149359	0.316356	3.19848	eap1∆	WT
YNL111C	2	1	43.1	0.15004	0.317455	1.78984	eap1∆	WT
YHR146W	12	8	320.4	0.150252	0.317561	1.21067	WT	eap1∆
YBR149W	16	13	613.39	0.150637	0.318029	1.11685	WT	eap1∆
YLR342W	36	17	1254.12	0.152017	0.320598	1.10991	WT	eap1∆
YNR034W-A	1	1	101.48	0.152634	0.321394	2.31484	WT	eap1∆
YDR424C	5	2	76.28	0.152724	0.321394	1.16722	eap1∆	WT
YOR204W	26	20	1420.27	0.152935	0.321463	1.21001	WT	eap1∆
YPL184C	6	2	71.69	0.153086	0.321463	1.40309	eap1∆	WT
YMR093W	4	4	56.51	0.153326	0.321483	1.68283	WT	eap1∆
YDR100W	1	1	15.05	0.153608	0.321483	2.0265	eap1∆	WT
YER062C	16	4	563.3	0.153627	0.321483	1.28871	WT	eap1∆
YER023W	14	10	407.07	0.153753	0.321483	1.1979	eap1∆	WT
YLR370C	6	3	153.26	0.154859	0.32345	1.3131	WT	eap1∆
YBR263W	18	12	646.48	0.155587	0.324623	1.16169	WT	eap1∆
YDR481C	10	6	200.61	0.156549	0.326283	2.46681	eap1∆	WT
YKL192C	2	2	85.11	0.156922	0.326712	1.16862	WT	eap1∆
YDR453C	4	1	71.83	0.157194	0.326931	1.72596	eap1∆	WT
YHR063C	12	8	412.17	0.158215	0.328704	1.10758	WT	eap1∆
YOL111C	2	2	52.48	0.159036	0.330058	1.12922	eap1∆	WT
YBR234C	14	7	304.42	0.159595	0.330401	1.22435	WT	eap1∆
YGR284C	2	2	110.16	0.159649	0.330401	1.25269	eap1∆	WT
YOR007C	21	16	944.02	0.159708	0.330401	1.32537	WT	eap1∆
YLR056W	4	2	36.96	0.160281	0.331237	7.95105	eap1∆	WT
YNL079C	18	15	958.78	0.160483	0.331303	1.13632	WT	eap1∆
YKL152C	19	16	1026.12	0.160888	0.33179	1.09229	WT	eap1∆
YGR157W	10	4	187.56	0.161868	0.333459	1.21105	eap1∆	WT
YER165W	29	23	1473.94	0.162327	0.334052	1.1556	WT	eap1∆
YBR031W	19	2	1358.81	0.162832	0.334738	1.81492	WT	eap1∆
YGR193C	9	3	126.06	0.163724	0.336219	1.6497	WT	eap1∆
YGL031C	11	3	509.47	0.164552	0.337565	1.15344	eap1∆	WT
YBL039C	24	19	952.7	0.164868	0.337857	1.12194	WT	eap1∆
YOL049W	11	5	261.52	0.165169	0.338121	1.35819	eap1∆	WT
YMR186W	51	10	3375.25	0.166003	0.339472	1.13762	eap1∆	WT
YOL077C	4	3	79.47	0.166249	0.339622	1.18044	WT	eap1∆
YJR137C	49	39	1672.92	0.166968	0.340329	1.34231	WT	eap1∆
YGR207C	13	10	390.55	0.166994	0.340329	1.29758	eap1∆	WT
YJL034W	30	19	1088.09	0.167118	0.340329	1.18431	WT	eap1∆
YLR009W	3	2	17.07	0.169285	0.344383	1.57663	eap1∆	WT
YER030W	6	4	150.86	0.169618	0.344702	1.16569	WT	eap1∆
YDL060W	4	4	102.18	0.169979	0.345076	1.16396	eap1∆	WT
YDL195W	32	24	961.2	0.17042	0.345613	1.09653	WT	eap1∆
YLR388W	5	2	280.9	0.171313	0.346827	1.49579	WT	eap1∆
YER055C	16	15	770.98	0.171373	0.346827	1.05546	WT	eap1∆
YEL013W	9	5	241.68	0.171663	0.347054	1.49781	eap1∆	WT
YOR096W	18	8	503.11	0.171983	0.347333	1.1252	WT	eap1∆
YJL014W	17	13	499.21	0.172334	0.347333	1.2952	eap1∆	WT
YDL201W	4	4	195.31	0.172334	0.347333	1.20196	WT	eap1∆
YPL135W	3	1	81.25	0.172541	0.347393	1.39439	eap1∆	WT
YDR182W	6	3	65.93	0.173427	0.348817	2.24214	eap1∆	WT
YOL144W	3	1	31.73	0.173775	0.349157	1.86682	eap1∆	WT
YMR242C	17	14	871.88	0.176591	0.354223	1.13807	WT	eap1∆
YGL115W	8	6	194.43	0.176659	0.354223	1.31524	eap1∆	WT
YPR073C	3	2	47.82	0.176867	0.354278	1.11669	WT	eap1∆
YGL087C	3	2	106.85	0.178161	0.356454	1.18339	eap1∆	WT
YJR065C	19	15	506.18	0.178318	0.356454	1.12141	WT	eap1∆
YMR194W	9	1	412.78	0.179089	0.357629	1.19272	eap1∆	WT
YDR529C	3	2	121.97	0.179692	0.358468	1.52906	WT	eap1∆
YMR149W	2	2	128.4	0.182205	0.363109	36.7581	eap1∆	WT
YBL056W	10	4	330.7	0.183013	0.364349	1.36127	eap1∆	WT
YPR149W	2	1	54.9	0.183652	0.365248	1.6732	eap1∆	WT
YCR052W	5	2	33.83	0.18399	0.365549	1.62462	eap1∆	WT
YPL012W	12	9	290.47	0.184371	0.365934	1.16454	WT	eap1∆
YFL022C	22	17	1152.56	0.184865	0.366339	1.11528	WT	eap1∆
YHR089C	6	3	120.6	0.185015	0.366339	1.2862	WT	eap1∆
YKL145W	14	9	388.26	0.185143	0.366339	1.36552	eap1∆	WT
YAL007C	4	1	37.28	0.185324	0.366339	1.25635	eap1∆	WT
YNL312W	3	2	56.5	0.185748	0.366806	1.16587	eap1∆	WT
YML079W	4	3	130.95	0.186394	0.36771	1.3148	WT	eap1∆
YHR026W	1	1	41.33	0.187614	0.369743	1.95138	WT	eap1∆
YGL056C	6	4	99.44	0.189003	0.372105	1.43598	eap1∆	WT
YCR005C	9	8	280.3	0.190026	0.373743	1.13407	eap1∆	WT
YLR093C	1	1	19.42	0.190281	0.373868	1.24217	eap1∆	WT
YBR042C	4	2	45.75	0.190735	0.374259	1.97795	eap1∆	WT
YGR095C	3	1	54.51	0.190863	0.374259	1.36283	eap1∆	WT
YDR011W	13	8	200.56	0.191572	0.375234	1.56837	WT	eap1∆
YDR472W	1	1	47.29	0.191862	0.375234	3.48276	WT	eap1∆
YNL168C	5	1	80.8	0.192248	0.375234	1.14123	WT	eap1∆
YLL011W	9	2	147.33	0.19226	0.375234	1.85853	eap1∆	WT
YLR304C	40	30	1603.02	0.192319	0.375234	1.08218	eap1∆	WT
YOR145C	9	2	68.6	0.193238	0.376088	1.18542	WT	eap1∆
YJL060W	12	11	400.59	0.193284	0.376088	1.24689	WT	eap1∆
YDR509W	1	1	22.5	0.193334	0.376088	Inf	eap1∆	WT
YGL019W	1	1	36.72	0.194722	0.378411	1.65604	eap1∆	WT
YNL070W	1	1	71.54	0.196052	0.380618	1.41565	WT	eap1∆
YPR069C	18	17	856.1	0.197171	0.38241	1.16145	WT	eap1∆
YIL091C	5	2	65.23	0.198624	0.384847	1.4485	WT	eap1∆
YBL004W	10	2	130.78	0.199032	0.385256	1.47488	eap1∆	WT
YDR051C	3	3	93.27	0.199366	0.385519	1.16779	WT	eap1∆
YIL133C	19	7	654.57	0.199563	0.385519	1.09422	WT	eap1∆
YMR056C	9	2	146.4	0.1998	0.385596	1.5013	eap1∆	WT
YMR071C	2	2	42.77	0.200588	0.385842	1.3922	WT	eap1∆
YNL192W	2	1	38.16	0.200648	0.385842	5.58816	WT	eap1∆
YLR058C	37	34	1973.83	0.200662	0.385842	1.0742	WT	eap1∆
YJR057W	3	1	34.98	0.200717	0.385842	1.29733	eap1∆	WT
YBR092C	10	2	184.41	0.202046	0.388016	1.15253	WT	eap1∆
YDL109C	4	2	27.78	0.202392	0.388225	2.25316	eap1∆	WT
YDR395W	11	7	323.15	0.202552	0.388225	1.41571	eap1∆	WT
YPL237W	18	12	555.62	0.203368	0.389406	1.08478	WT	eap1∆
YLR172C	6	2	203.97	0.205416	0.392944	1.2105	WT	eap1∆
YOR340C	3	2	74.15	0.205735	0.39317	1.12157	WT	eap1∆
YER127W	5	2	31.6	0.206496	0.394	1.4855	eap1∆	WT
YPL269W	6	2	30.13	0.206573	0.394	8.1785	eap1∆	WT
YPL139C	3	1	56.49	0.208547	0.39733	1.78298	eap1∆	WT
YLR321C	3	2	26.26	0.2088	0.39733	15.2598	eap1∆	WT
YDL055C	19	16	1304.76	0.208929	0.39733	1.10647	eap1∆	WT
YFL044C	2	1	25.77	0.209811	0.39833	1.23637	eap1∆	WT
YHR010W	11	1	676.67	0.209862	0.39833	1.37182	WT	eap1∆
YBR143C	19	15	846.74	0.21026	0.398611	1.14884	eap1∆	WT
YOL113W	5	3	32.49	0.210418	0.398611	1.3525	eap1∆	WT
YBL027W	12	10	678.09	0.210949	0.399036	1.12354	WT	eap1∆
YCR087C-A	5	3	90.02	0.21105	0.399036	1.57255	eap1∆	WT
YGL167C	7	3	109.55	0.211959	0.400367	1.44581	eap1∆	WT
YDL014W	15	11	496.65	0.212414	0.400589	1.11198	WT	eap1∆
YBR068C	4	2	79.17	0.212645	0.400589	19.4572	eap1∆	WT
YPR004C	13	9	307.17	0.212692	0.400589	1.15213	WT	eap1∆
YDL031W	11	4	96.66	0.213212	0.401184	1.6222	eap1∆	WT
YJR063W	3	2	122.55	0.213528	0.401391	1.2087	WT	eap1∆
YPR016C	6	5	288.78	0.214731	0.403263	1.12471	eap1∆	WT
YOR261C	8	6	198.64	0.214944	0.403263	1.21763	eap1∆	WT
YOL127W	11	9	396.74	0.215142	0.403263	1.10944	WT	eap1∆
YGR081C	3	2	31.57	0.215715	0.40395	1.56053	WT	eap1∆
YFR028C	2	1	60.63	0.216327	0.404708	1.8466	WT	eap1∆
YPR024W	12	5	95.84	0.216706	0.40503	1.36191	eap1∆	WT
YML101C	1	1	13.77	0.217374	0.40586	1.96519	eap1∆	WT
YLR432W	24	7	1557.45	0.217566	0.40586	1.08437	WT	eap1∆
YHR065C	7	3	152.56	0.218099	0.406466	1.75702	WT	eap1∆
YPR180W	2	2	39.8	0.218606	0.407023	1.32797	WT	eap1∆
YOR290C	11	3	67.05	0.219281	0.407892	1.38714	eap1∆	WT
YOR194C	1	1	58.62	0.219939	0.408726	2.01323	eap1∆	WT
YHR196W	2	1	131.5	0.22171	0.411627	1.94816	WT	eap1∆
YGL189C	4	3	252.24	0.22248	0.412665	1.14342	eap1∆	WT
YMR311C	7	7	65.62	0.222852	0.412963	1.62366	eap1∆	WT
YOR056C	3	2	100.74	0.22343	0.413641	1.21196	eap1∆	WT
YKR074W	4	1	78.18	0.224836	0.415832	1.92036	eap1∆	WT
YDR368W	14	8	509.78	0.225038	0.415832	1.1316	WT	eap1∆
YLR199C	4	4	143.69	0.225552	0.416204	1.41167	WT	eap1∆
YNL064C	14	14	616.44	0.225666	0.416204	1.08875	WT	eap1∆
YOR187W	16	14	569.8	0.226053	0.416525	1.14806	eap1∆	WT
YGR229C	6	3	88.42	0.22661	0.417159	1.47052	WT	eap1∆
YDR317W	3	1	30.42	0.227398	0.418216	1.52135	WT	eap1∆
YMR047C	2	1	57.56	0.227786	0.418535	3.62492	eap1∆	WT
YOR136W	14	11	671.78	0.229406	0.421115	1.10187	WT	eap1∆
YER002W	4	2	60.78	0.229823	0.421485	1.27716	WT	eap1∆
YOL123W	5	5	156.82	0.230453	0.422245	1.14572	WT	eap1∆
YCL034W	3	3	69.93	0.230964	0.422731	1.18505	eap1∆	WT
YGR090W	16	11	360.96	0.231261	0.422731	1.14452	WT	eap1∆
YPL058C	12	4	103.17	0.231367	0.422731	1.25299	WT	eap1∆
YOR048C	5	2	38.21	0.231977	0.423322	1.24289	WT	eap1∆
YOL076W	12	2	65.03	0.232321	0.423322	1.43837	WT	eap1∆
YDR353W;YHR106W	18	15	1156.05	0.232552	0.423322	1.07175	WT	eap1∆
YKL008C	2	1	44.58	0.232556	0.423322	1.04903	WT	eap1∆
YJL087C	6	3	22.33	0.234178	0.425878	1.25249	eap1∆	WT
YBR084W	22	14	552.52	0.234601	0.425988	1.11901	WT	eap1∆
YNL166C	7	5	194.26	0.234675	0.425988	2.82827	eap1∆	WT
YGL111W	5	2	78.99	0.235827	0.427683	1.35403	WT	eap1∆
YDR303C	8	1	75.91	0.236197	0.427849	1.95233	eap1∆	WT
YGL198W	1	1	30.32	0.236356	0.427849	2.72513	eap1∆	WT
YLR268W	2	1	43.81	0.236775	0.428178	1.62443	eap1∆	WT
YKR038C	4	2	40.87	0.237132	0.428178	1.57359	eap1∆	WT
YPR043W	6	6	382.98	0.237195	0.428178	1.23158	WT	eap1∆
YDR063W	1	1	45.76	0.237663	0.428627	1.4798	WT	eap1∆
YGL207W	24	16	747.77	0.238536	0.429805	1.17338	eap1∆	WT
YLR449W	4	2	97.31	0.239994	0.432033	2.18067	eap1∆	WT
YLR332W	1	1	59.26	0.240734	0.432968	4.50185	WT	eap1∆
YMR314W	11	8	400.76	0.24126	0.43333	1.11724	WT	eap1∆
YDR476C	2	2	87.9	0.241452	0.43333	2.7997	eap1∆	WT
YMR015C	4	1	25.34	0.241601	0.43333	6.33945	WT	eap1∆
YAL049C	5	3	103.6	0.242659	0.434798	1.37102	WT	eap1∆
YCL011C	8	6	154.94	0.242864	0.434798	2.24506	eap1∆	WT
YER042W	8	7	162.55	0.243353	0.435275	1.17088	eap1∆	WT
YDR510W	6	4	181.13	0.243749	0.435585	1.19125	WT	eap1∆
YDL086W	9	7	194.32	0.244181	0.43584	1.08347	WT	eap1∆
YPR040W	4	3	31.69	0.244338	0.43584	1.14765	eap1∆	WT
YGR106C	1	1	20.57	0.245212	0.437	1.38527	eap1∆	WT
YER164W	8	2	98.72	0.24654	0.438926	1.10254	WT	eap1∆
YER025W	23	18	908.51	0.246821	0.438926	1.05807	WT	eap1∆
YIR035C	3	2	60.65	0.247128	0.438926	1.30116	WT	eap1∆
YNL098C	7	5	246.45	0.247191	0.438926	1.30149	eap1∆	WT
YLR270W	13	9	402.04	0.247922	0.439825	1.09205	WT	eap1∆
YGR103W	14	14	381.83	0.249014	0.441241	1.1047	eap1∆	WT
YER080W	19	15	437.61	0.249171	0.441241	1.20931	WT	eap1∆
YDR513W	6	5	181.91	0.250211	0.442201	1.1518	WT	eap1∆
YGR192C	37	11	2437.19	0.250222	0.442201	1.16925	WT	eap1∆
YDL120W	2	2	114.38	0.250392	0.442201	1.3664	eap1∆	WT
YOL031C	5	1	31.73	0.2516	0.443538	1.38423	eap1∆	WT
YBR191W	10	1	462.37	0.251683	0.443538	1.34947	WT	eap1∆
YGL231C	1	1	21.21	0.25183	0.443538	2.2286	eap1∆	WT
YDR036C	4	1	54.62	0.252513	0.44434	1.26966	eap1∆	WT
YJL101C	5	4	69.49	0.252756	0.444369	1.3822	eap1∆	WT
YBR164C	4	3	105.75	0.254031	0.445969	1.2568	WT	eap1∆
YNR053C	11	5	211.82	0.25423	0.445969	1.25241	WT	eap1∆
YOR020W-A	2	2	63.89	0.254351	0.445969	1.39551	WT	eap1∆
YMR092C	15	11	401.91	0.25526	0.447162	1.21633	WT	eap1∆
YEL020W-A	3	3	131.78	0.256072	0.447958	1.26652	WT	eap1∆
YLR163C	3	2	47.02	0.256172	0.447958	1.14185	WT	eap1∆
YOR051C	10	6	252.74	0.258641	0.451625	1.18697	WT	eap1∆
YPL023C	7	2	107.02	0.258731	0.451625	1.35221	eap1∆	WT
YER048C	10	7	429.61	0.259265	0.451936	1.14124	WT	eap1∆
YPR010C	29	22	979.11	0.259372	0.451936	1.14776	WT	eap1∆
YER024W	5	3	75.94	0.259658	0.452031	1.22212	WT	eap1∆
YMR235C	14	12	542.92	0.260463	0.453029	1.17668	eap1∆	WT
YOL027C	10	6	206.16	0.263094	0.45712	1.1495	WT	eap1∆
YIL076W	7	5	212.85	0.263282	0.45712	1.18454	eap1∆	WT
YLR075W	19	15	899.67	0.264671	0.459123	1.09024	WT	eap1∆
YLR195C	8	6	194.01	0.26562	0.460361	1.09663	WT	eap1∆
YOR173W	3	1	117.15	0.265934	0.460497	1.32644	WT	eap1∆
YPL169C	4	1	62.92	0.266505	0.46078	5.22925	WT	eap1∆
YDL007W	16	11	487.19	0.266771	0.46078	3.14338	eap1∆	WT
YPL208W	4	2	48.47	0.266857	0.46078	1.4104	eap1∆	WT
YBR198C	12	4	92.2	0.267351	0.46078	1.24055	WT	eap1∆
YDR086C	1	1	31.43	0.267427	0.46078	Inf	eap1∆	WT
YDL136W	10	6	742.34	0.267512	0.46078	1.15408	WT	eap1∆
YAL044W-A	3	2	31.34	0.267993	0.461202	1.28607	WT	eap1∆
YFR049W	6	5	74.04	0.268506	0.461679	1.16695	WT	eap1∆
YOL056W	5	2	66.88	0.269523	0.462277	1.63011	WT	eap1∆
YHR028C	5	1	41.85	0.269671	0.462277	2.52734	eap1∆	WT
YGR136W	2	2	90.99	0.269754	0.462277	1.35268	WT	eap1∆
YOR257W	3	2	61.35	0.27006	0.462277	1.4155	WT	eap1∆
YKL033W-A	7	5	300.95	0.270286	0.462277	1.15759	WT	eap1∆
YOR206W	10	7	172.21	0.270332	0.462277	1.14955	eap1∆	WT
YIR006C	12	7	334.1	0.270527	0.462277	1.43779	eap1∆	WT
YIL105C	6	2	59.65	0.270745	0.462277	1.64047	WT	eap1∆
YNR017W	5	5	132.85	0.272186	0.464331	1.29516	WT	eap1∆
YHR007C	7	5	207.92	0.273022	0.465296	1.39314	eap1∆	WT
YKL195W	4	2	41.28	0.273228	0.465296	1.63005	eap1∆	WT
YLR248W	8	4	113.13	0.274039	0.466173	1.16147	WT	eap1∆
YCL028W	7	4	202.69	0.274219	0.466173	1.10094	WT	eap1∆
YDL126C	46	40	2088.88	0.27496	0.466687	1.09234	WT	eap1∆
YGL221C	12	9	393.37	0.275	0.466687	1.0541	WT	eap1∆
YAL022C	2	1	14.73	0.275516	0.466933	2.35282	eap1∆	WT
YMR089C	8	1	79.47	0.275622	0.466933	1.49521	WT	eap1∆
YML092C	8	7	379.55	0.276501	0.467859	1.09148	WT	eap1∆
YJL190C	11	9	747.85	0.276792	0.467859	1.16725	WT	eap1∆
YHR122W	3	2	118.54	0.276886	0.467859	1.47102	eap1∆	WT
YHR039C	8	7	156.69	0.277369	0.46827	1.81969	eap1∆	WT
YGL076C	21	1	1074.63	0.278017	0.468588	1.32244	eap1∆	WT
YKL014C	19	6	191.44	0.278037	0.468588	2.38016	eap1∆	WT
YLL045C	23	4	1490.31	0.278507	0.468976	1.28204	WT	eap1∆
YDR025W	12	10	573.82	0.280397	0.471753	1.17238	WT	eap1∆
YPR133C	9	5	227.05	0.281569	0.473257	1.20256	eap1∆	WT
YLR147C	3	1	33.43	0.281993	0.473257	1.33709	eap1∆	WT
YMR039C	4	2	139.23	0.282041	0.473257	1.30801	WT	eap1∆
YMR074C	2	2	116.89	0.282413	0.473257	1.16767	WT	eap1∆
YGL065C	5	3	184.24	0.282502	0.473257	1.30195	eap1∆	WT
YHL038C	2	2	18.3	0.283426	0.474348	1.16508	eap1∆	WT
YOR002W	2	2	35.6	0.283638	0.474348	2.64204	eap1∆	WT
YBR086C	6	2	116.28	0.2844	0.475215	4.37842	WT	eap1∆
YKL027W	4	3	45.56	0.284861	0.47558	1.40806	eap1∆	WT
YBR200W	3	1	51.49	0.285353	0.475995	5.46029	WT	eap1∆
YJL054W	1	1	17.36	0.285816	0.476359	1.98994	WT	eap1∆
YBL058W	12	7	382.62	0.286876	0.477719	1.08043	WT	eap1∆
YOR326W	25	14	646.19	0.287831	0.478902	1.41789	eap1∆	WT
YLR059C	2	1	105.91	0.288231	0.47916	1.49376	WT	eap1∆
YDR232W	6	5	126.79	0.289486	0.480638	1.44804	WT	eap1∆
YDR207C	4	2	28.98	0.289612	0.480638	1.14176	WT	eap1∆
YML120C	4	3	44.72	0.292128	0.483889	1.41322	WT	eap1∆
YGR277C	5	4	90.56	0.292206	0.483889	1.19904	eap1∆	WT
YER168C	6	4	70.06	0.292314	0.483889	1.19569	eap1∆	WT
YDR062W	10	7	222.15	0.293272	0.485066	1.32826	WT	eap1∆
YLR029C;YMR121C	12	9	653.5	0.294411	0.486538	1.1861	WT	eap1∆
YGR186W	12	6	85.55	0.294726	0.486647	1.50387	eap1∆	WT
YMR158W	3	2	30.72	0.295413	0.487369	1.6595	eap1∆	WT
YLR285W	2	2	58.33	0.295951	0.487486	1.24772	WT	eap1∆
YKR096W	3	2	19.78	0.295982	0.487486	1.11525	WT	eap1∆
YDR331W	1	1	19.15	0.296281	0.487567	1.53383	eap1∆	WT
YCR002C	11	9	303.61	0.296763	0.48795	1.16281	WT	eap1∆
YGL103W	9	7	338.98	0.297257	0.48835	1.09751	eap1∆	WT
YDR087C	6	3	55.33	0.298283	0.489222	1.24135	eap1∆	WT
YLR167W;YIL148W	12	8	627.68	0.298544	0.489222	1.0864	eap1∆	WT
YBR077C	1	1	49.2	0.298862	0.489222	1.59515	WT	eap1∆
YHL004W	2	1	13.39	0.299024	0.489222	1.04839	eap1∆	WT
YLL062C	4	3	82.17	0.299039	0.489222	1.587	eap1∆	WT
YLR002C	7	2	114.22	0.30162	0.493032	1.24191	WT	eap1∆
YNL131W	5	4	218.87	0.302331	0.493782	1.163	WT	eap1∆
YDL212W	2	1	39.46	0.304744	0.497308	1.69939	WT	eap1∆
YMR142C	10	1	499.81	0.305048	0.497388	1.64119	WT	eap1∆
YDL080C	5	2	179.66	0.306152	0.498362	1.41754	WT	eap1∆
YGR038W	1	1	21.77	0.306155	0.498362	1.49404	eap1∆	WT
YGR054W	14	12	374.35	0.307845	0.500695	1.13253	WT	eap1∆
YEL057C	2	1	23.8	0.308574	0.501464	Inf	eap1∆	WT
YKL104C	34	28	1021.66	0.31022	0.503653	1.05635	eap1∆	WT
YBR106W	6	4	129.74	0.310552	0.503653	1.24812	WT	eap1∆
YNL002C	8	4	163.03	0.310773	0.503653	1.09595	WT	eap1∆
YER136W	17	12	363.68	0.310951	0.503653	1.11517	WT	eap1∆
YOR239W	10	6	204	0.311277	0.503763	1.13969	WT	eap1∆
YOL060C	2	2	26.72	0.312039	0.504444	1.12967	WT	eap1∆
YFR002W	8	3	132.58	0.313171	0.504444	3.03489	eap1∆	WT
YDL144C	3	2	46.73	0.313271	0.504444	1.18547	eap1∆	WT
YGR187C	3	1	90.03	0.3134	0.504444	1.37698	WT	eap1∆
YHR042W	21	14	734.21	0.313435	0.504444	1.15371	WT	eap1∆
YFR044C	15	10	605.81	0.313606	0.504444	1.11324	eap1∆	WT
YEL030W	18	3	533.86	0.313643	0.504444	1.47957	WT	eap1∆
YHR190W	9	7	301.78	0.313862	0.504444	1.31279	eap1∆	WT
YIL118W	4	4	167.28	0.31402	0.504444	1.88757	eap1∆	WT
YNL055C	16	12	793.81	0.314308	0.504493	1.17891	WT	eap1∆
YJL189W	2	2	90.8	0.314816	0.504894	1.17973	WT	eap1∆
YJL183W	5	4	63.14	0.315856	0.506147	1.36959	WT	eap1∆
YFL028C	3	3	71.74	0.317146	0.507537	1.18836	WT	eap1∆
YOR042W	9	5	134.87	0.317243	0.507537	1.05296	WT	eap1∆
YDR390C	5	1	57.73	0.317653	0.507777	2.29086	WT	eap1∆
YGR032W	21	2	749.58	0.318206	0.508246	1.17866	eap1∆	WT
YPR085C	3	1	28.83	0.320051	0.510775	1.22529	eap1∆	WT
YOR260W	4	2	54.89	0.320811	0.511201	1.19209	WT	eap1∆
YDR406W	8	2	123.95	0.320841	0.511201	1.25957	WT	eap1∆
YLR452C	9	4	80.95	0.321233	0.51131	1.34657	WT	eap1∆
YNL099C	1	1	31.1	0.321432	0.51131	1.35302	WT	eap1∆
YBR094W	4	1	51.43	0.322239	0.512176	1.12092	eap1∆	WT
YPL093W	14	6	337.32	0.32444	0.514722	1.09815	eap1∆	WT
YGR027C	7	4	352.33	0.324533	0.514722	1.13637	WT	eap1∆
YCR017C	1	1	15.77	0.32463	0.514722	1.73514	eap1∆	WT
YER036C	21	17	1086.13	0.326762	0.517682	1.05411	WT	eap1∆
YPL206C	2	1	29.04	0.327053	0.517723	1.39933	WT	eap1∆
YGR211W	15	10	526.77	0.328624	0.519407	1.07039	eap1∆	WT
YMR264W	4	4	146.31	0.328648	0.519407	2.14098	eap1∆	WT
YCL008C	2	2	26.23	0.330295	0.521588	1.40781	WT	eap1∆
YIL021W	4	2	109.85	0.330926	0.522007	1.38258	WT	eap1∆
YKL196C	9	6	425.7	0.331094	0.522007	1.50425	eap1∆	WT
YKL114C	5	3	81.23	0.332216	0.523087	1.27076	eap1∆	WT
YOR251C	6	4	270.08	0.332314	0.523087	1.17994	eap1∆	WT
YGR232W	4	4	100.36	0.333054	0.52383	1.09678	eap1∆	WT
YMR266W	3	1	73.43	0.333934	0.524792	2.42759	eap1∆	WT
YGR124W	30	19	1307.22	0.335726	0.527184	1.0796	WT	eap1∆
YPL037C	8	5	297.19	0.336178	0.52747	1.093	WT	eap1∆
YPL211W	2	1	23.95	0.337071	0.528447	1.3113	WT	eap1∆
YNR052C	2	1	71.13	0.33747	0.528649	1.25116	eap1∆	WT
YIR038C	7	5	173.49	0.338143	0.528857	1.18934	eap1∆	WT
YGL097W	3	3	62.63	0.33825	0.528857	1.18501	WT	eap1∆
YJL050W	10	4	225.1	0.338415	0.528857	1.20958	eap1∆	WT
YOL016C	3	1	24.68	0.340178	0.531188	1.19057	eap1∆	WT
YNL045W	4	4	100.95	0.342189	0.533902	1.06856	WT	eap1∆
YDL124W	18	16	701.86	0.342919	0.534364	1.10419	WT	eap1∆
YML072C	21	14	692.21	0.343032	0.534364	1.23837	WT	eap1∆
YPR143W	4	2	73.33	0.344189	0.535661	1.19729	WT	eap1∆
YOR265W	6	6	232.04	0.344412	0.535661	1.09505	eap1∆	WT
YMR243C	6	3	144.2	0.345461	0.536866	1.38041	WT	eap1∆
YNR015W	5	1	59.37	0.345874	0.53708	1.22607	WT	eap1∆
YMR298W	2	1	24.94	0.346593	0.537344	Inf	WT	eap1∆
YBL057C	4	1	115.53	0.346593	0.537344	Inf	WT	eap1∆
YIL051C	6	6	384.31	0.347798	0.538647	1.32087	eap1∆	WT
YPR041W	17	12	597.84	0.347985	0.538647	1.25279	eap1∆	WT
YDR092W	3	2	59.9	0.349495	0.540556	1.19431	eap1∆	WT
YML026C	19	14	737.26	0.353343	0.546076	1.11115	WT	eap1∆
YER083C	3	2	97.62	0.355104	0.548364	1.29988	WT	eap1∆
YJR053W	5	3	38.56	0.355448	0.548461	1.07022	eap1∆	WT
YNL246W	1	1	29.79	0.356099	0.548618	1.28205	eap1∆	WT
YLR133W	5	3	70.81	0.356129	0.548618	1.6162	eap1∆	WT
YPR125W	13	2	97.16	0.356612	0.548618	1.71261	WT	eap1∆
YGR261C	9	4	80.98	0.356905	0.548618	1.1199	WT	eap1∆
YDR448W	1	1	15.47	0.356952	0.548618	1.1017	WT	eap1∆
YMR268C	5	1	35.71	0.357566	0.549129	1.77845	eap1∆	WT
YPL078C	4	3	278.22	0.358143	0.549291	1.24193	WT	eap1∆
YOL039W	7	6	482.43	0.358233	0.549291	1.1606	WT	eap1∆
YOR286W	6	2	129.32	0.358815	0.549752	1.27184	eap1∆	WT
YLR441C	28	4	1218.77	0.359276	0.550027	1.07288	eap1∆	WT
YBL020W	2	2	51.25	0.361853	0.553539	2.12356	eap1∆	WT
YPL131W	20	15	1006.13	0.362678	0.554367	1.09956	WT	eap1∆
YBR170C	9	3	79.31	0.364234	0.555687	1.1172	eap1∆	WT
YJL010C	7	4	130.85	0.364535	0.555687	1.10208	WT	eap1∆
YBR015C	7	1	114.31	0.364803	0.555687	1.21426	eap1∆	WT
YDL099W	5	1	46.14	0.364899	0.555687	1.16656	eap1∆	WT
YJR075W	3	1	55.76	0.364963	0.555687	1.57059	WT	eap1∆
YGR178C	3	3	37.57	0.365976	0.556795	2.26284	eap1∆	WT
YOR182C	2	2	132	0.367217	0.55825	1.24275	WT	eap1∆
YML022W	4	2	190.09	0.368693	0.559934	1.20132	WT	eap1∆
YKL067W	9	8	535.12	0.369125	0.559934	1.06601	WT	eap1∆
YMR315W	13	9	540.6	0.369184	0.559934	1.09643	WT	eap1∆
YGL068W	7	1	100.55	0.37002	0.560766	1.10588	WT	eap1∆
YDL178W	8	6	242.9	0.371376	0.562385	1.06896	WT	eap1∆
YDR394W	10	7	376.86	0.372249	0.563272	1.34523	eap1∆	WT
YNL044W	5	3	152.87	0.372837	0.563725	1.39418	eap1∆	WT
YER125W	15	13	405.73	0.373316	0.563728	1.30897	eap1∆	WT
YGL070C	3	2	79	0.373416	0.563728	1.35027	eap1∆	WT
YGR275W	2	1	74.26	0.373961	0.563764	1.40081	eap1∆	WT
YGR145W	6	2	100.7	0.374016	0.563764	1.15213	WT	eap1∆
YER105C	11	4	124.06	0.374724	0.564395	1.30913	eap1∆	WT
YIL142W	23	13	923.25	0.376024	0.565918	1.03883	eap1∆	WT
YKL057C	9	3	118.36	0.376831	0.566595	2.22509	eap1∆	WT
YBR283C	5	4	56.78	0.37724	0.566595	1.88798	eap1∆	WT
YIR008C	6	2	55.14	0.377602	0.566595	1.18419	eap1∆	WT
YKL148C	5	2	116.07	0.377633	0.566595	1.53012	eap1∆	WT
YDR189W	7	1	111.78	0.381915	0.572579	1.29307	WT	eap1∆
YLR364W	3	3	59.95	0.383495	0.574363	1.20988	WT	eap1∆
YOR259C	8	7	288.11	0.383883	0.574363	1.18374	eap1∆	WT
YKL172W	9	5	256.41	0.383986	0.574363	1.07839	WT	eap1∆
YML048W	10	8	352.07	0.385094	0.57558	1.16789	WT	eap1∆
YDR200C	3	1	42.83	0.385854	0.575953	1.17841	WT	eap1∆
YPL129W	4	4	157.83	0.386083	0.575953	1.10403	eap1∆	WT
YOR176W	9	5	173.04	0.386227	0.575953	1.20595	eap1∆	WT
YJR109C	60	47	3097.2	0.386635	0.576039	1.1137	WT	eap1∆
YBR162C	6	5	205.51	0.386942	0.576039	1.17264	WT	eap1∆
YDL058W	31	9	322.94	0.387169	0.576039	1.12326	WT	eap1∆
YGR254W	41	16	2400.2	0.387719	0.576419	1.08236	WT	eap1∆
YIL136W	5	3	211.17	0.388205	0.576703	1.38189	WT	eap1∆
YNL049C	3	1	71.67	0.389201	0.577462	1.4728	WT	eap1∆
YEL042W	8	6	194.53	0.389587	0.577462	1.09833	WT	eap1∆
YLR038C	1	1	22.54	0.389831	0.577462	1.10377	WT	eap1∆
YEL003W	2	1	38.01	0.390255	0.577462	2.17275	eap1∆	WT
YPL031C	6	2	102.94	0.390702	0.577462	1.35823	eap1∆	WT
YJL148W	2	1	48.49	0.39071	0.577462	1.24798	WT	eap1∆
YBR029C	4	1	89.57	0.390892	0.577462	1.19379	eap1∆	WT
YJR045C	37	18	1830.01	0.391079	0.577462	1.06779	WT	eap1∆
YPL218W	7	7	361.99	0.392031	0.578431	1.05117	WT	eap1∆
YBR082C	5	3	114.73	0.392619	0.578861	1.16925	WT	eap1∆
YLL040C	23	8	253.53	0.393881	0.579382	1.19106	eap1∆	WT
YPL134C	1	1	16.17	0.39395	0.579382	1.5205	WT	eap1∆
YDR171W	3	3	50.5	0.394093	0.579382	1.1166	WT	eap1∆
YGL147C	13	1	734.28	0.394158	0.579382	1.1697	eap1∆	WT
YDL153C	8	5	180.87	0.395265	0.580573	1.29292	WT	eap1∆
YBL076C	56	42	2140.42	0.397918	0.584032	1.0697	eap1∆	WT
YER122C	15	10	241.23	0.400246	0.586886	1.68107	eap1∆	WT
YIL110W	6	3	50.68	0.400463	0.586886	2.90079	eap1∆	WT
YGL120C	12	10	176.04	0.40136	0.587759	1.30805	eap1∆	WT
YEL034W	12	9	705.18	0.403713	0.590318	1.08054	WT	eap1∆
YGL105W	14	13	658.42	0.403846	0.590318	1.0397	WT	eap1∆
YLR389C	9	5	145.08	0.404303	0.590318	1.09021	eap1∆	WT
YDL061C	6	5	308.65	0.404315	0.590318	1.13098	WT	eap1∆
YOR280C	3	2	108.72	0.404905	0.590471	1.18528	eap1∆	WT
YER143W	3	2	28.65	0.405485	0.590471	1.18615	eap1∆	WT
YHR005C	5	2	96.27	0.405567	0.590471	1.36677	eap1∆	WT
YOR271C	4	3	119.81	0.405738	0.590471	1.14817	eap1∆	WT
YCR057C	3	1	77.34	0.405995	0.590471	1.24859	eap1∆	WT
YBR003W	4	1	24.46	0.406347	0.590471	52.3973	WT	eap1∆
YNL292W	2	2	64.92	0.406534	0.590471	1.40284	eap1∆	WT
YOR168W	40	28	1444.23	0.407661	0.591669	1.1028	eap1∆	WT
YLR401C	10	6	289.6	0.408629	0.592204	1.1143	eap1∆	WT
YBR049C	13	5	184.01	0.408636	0.592204	1.20646	eap1∆	WT
YDL219W	1	1	15.14	0.411148	0.59534	1.85208	eap1∆	WT
YKL016C	4	4	163.46	0.411409	0.59534	1.32447	WT	eap1∆
YJL115W	3	3	82.69	0.411812	0.595483	1.05806	WT	eap1∆
YEL040W	3	3	28.61	0.413033	0.596806	1.34413	WT	eap1∆
YGR266W	8	6	113.33	0.413521	0.59707	1.31368	eap1∆	WT
YFR001W	2	2	130.53	0.414061	0.597409	1.06315	WT	eap1∆
YGR271C-A	4	2	79.86	0.415425	0.598935	2.24165	eap1∆	WT
YLR181C	4	1	31.75	0.415799	0.599033	1.1898	eap1∆	WT
YJR096W	6	4	141.1	0.416309	0.599326	1.26636	eap1∆	WT
YNL263C	2	2	31.54	0.418292	0.601567	1.19223	eap1∆	WT
YBL092W	8	5	358.83	0.418481	0.601567	1.16607	WT	eap1∆
YPL086C	9	6	191.22	0.419383	0.60242	1.08044	eap1∆	WT
YML030W	2	1	33.13	0.420328	0.603053	1.37471	eap1∆	WT
YDL161W	9	3	146.55	0.420441	0.603053	2.59058	eap1∆	WT
YNL001W	6	1	75.78	0.421474	0.604092	1.26531	eap1∆	WT
YGL181W	3	1	62.96	0.422331	0.604877	1.09924	eap1∆	WT
YDL128W	1	1	69.88	0.423504	0.606114	1.15172	WT	eap1∆
YPL050C	7	2	139.18	0.424793	0.607242	1.17281	WT	eap1∆
YCL026C-B	1	1	34.44	0.424976	0.607242	10.5206	WT	eap1∆
YGR214W	13	2	665.01	0.425225	0.607242	1.27891	eap1∆	WT
YLR069C	9	4	39.75	0.426472	0.608578	1.14836	eap1∆	WT
YLL048C	24	11	324.89	0.426912	0.608762	5.1752	eap1∆	WT
YPR086W	6	1	86.54	0.429187	0.61156	3.90567	WT	eap1∆
YDR429C	10	8	427.81	0.431426	0.614182	1.09166	eap1∆	WT
YGL129C	5	1	24.52	0.431655	0.614182	1.09352	WT	eap1∆
YLR372W	2	1	81.64	0.433237	0.615543	3.0217	WT	eap1∆
YOR191W	16	3	131.9	0.433242	0.615543	1.23122	WT	eap1∆
YHR074W	9	8	205.42	0.433831	0.615934	3.01003	eap1∆	WT
YJR088C	6	3	255.49	0.434179	0.61598	6.69331	eap1∆	WT
YNL330C	2	2	95.51	0.43452	0.616017	1.19202	WT	eap1∆
YOR272W	8	7	168.38	0.435083	0.616368	1.08761	eap1∆	WT
YGL139W	4	2	52.39	0.43617	0.617189	1.69141	eap1∆	WT
YOR310C	17	15	630.37	0.436374	0.617189	1.72879	eap1∆	WT
YPL009C	11	5	146.23	0.43661	0.617189	1.07693	eap1∆	WT
YDL100C	8	5	316.84	0.436945	0.617217	1.72211	eap1∆	WT
YDR059C	2	1	70.91	0.437711	0.617435	5.86789	eap1∆	WT
YPR020W	2	1	63.05	0.437731	0.617435	1.36694	WT	eap1∆
YGR008C	4	2	87.63	0.438938	0.618691	1.40652	WT	eap1∆
YFR050C	4	2	142.4	0.439569	0.619133	1.06144	WT	eap1∆
YNL280C	2	2	72.65	0.440544	0.619379	1.85003	eap1∆	WT
YBR080C	15	8	253.8	0.440651	0.619379	1.08614	WT	eap1∆
YLL001W	13	11	333.6	0.44076	0.619379	5.08029	eap1∆	WT
YBL098W	5	1	44.51	0.441011	0.619379	1.86193	WT	eap1∆
YBR279W	7	4	71.26	0.442946	0.620569	1.18342	eap1∆	WT
YNR038W	5	1	65.53	0.443234	0.620569	1.14184	eap1∆	WT
YPL239W	7	5	230.4	0.443292	0.620569	1.19128	WT	eap1∆
YMR140W	2	1	16.26	0.443428	0.620569	1.78781	eap1∆	WT
YBR261C	3	1	22.05	0.443445	0.620569	1.14483	eap1∆	WT
YIL115C	15	9	236.04	0.445287	0.622702	1.29977	eap1∆	WT
YLR253W	4	1	25.97	0.445866	0.622921	1.0963	WT	eap1∆
YJR080C	6	4	82.74	0.446082	0.622921	1.13635	WT	eap1∆
YJR149W	4	1	39.03	0.446652	0.623273	1.19005	eap1∆	WT
YIL153W	1	1	30.72	0.447437	0.623922	2.09581	eap1∆	WT
YDR060W	10	6	229.96	0.449199	0.625506	2.43805	eap1∆	WT
YLR287C	6	5	90.32	0.449213	0.625506	1.29754	eap1∆	WT
YPR165W	9	5	299.15	0.45319	0.63039	1.14992	WT	eap1∆
YIL002W-A	6	5	134.85	0.453524	0.63039	1.09386	WT	eap1∆
YLR185W	5	4	200.47	0.453687	0.63039	1.18016	eap1∆	WT
YGL001C	3	2	143.83	0.4549	0.631625	1.26903	eap1∆	WT
YIL069C	9	6	456.39	0.455516	0.632033	1.10583	WT	eap1∆
YDL025C	5	1	91.58	0.457407	0.634207	2.88155	WT	eap1∆
YHR193C	11	11	509.54	0.458907	0.635835	1.05111	eap1∆	WT
YJL178C	4	3	52.09	0.460561	0.637563	6.52816	eap1∆	WT
YEL031W	22	15	664.68	0.460918	0.637563	1.543	eap1∆	WT
YMR153W	3	2	35.36	0.461133	0.637563	1.42074	WT	eap1∆
YFL004W	12	7	96.56	0.462372	0.638825	1.22635	eap1∆	WT
YDR033W	3	1	129.48	0.463899	0.640482	1.13609	eap1∆	WT
YDL075W	10	1	531.59	0.465573	0.642022	1.10923	WT	eap1∆
YCR077C	7	3	109.72	0.466129	0.642022	1.05909	WT	eap1∆
YGR169C-A	3	1	125.29	0.466245	0.642022	1.41309	WT	eap1∆
YOR254C	15	7	291.08	0.466597	0.642022	1.37869	eap1∆	WT
YLR200W	6	3	342.11	0.467002	0.642022	1.0657	WT	eap1∆
YIL124W	6	5	195.28	0.467071	0.642022	1.09398	WT	eap1∆
YPL171C	3	1	40.53	0.467313	0.642022	2.4012	WT	eap1∆
YOL086C	25	13	1643.35	0.468128	0.642689	1.1722	WT	eap1∆
YML073C	18	4	811.86	0.468914	0.643318	1.06931	eap1∆	WT
YDR432W	9	5	372.69	0.470704	0.644922	1.49168	eap1∆	WT
YDR404C	4	2	73.38	0.470743	0.644922	1.16765	WT	eap1∆
YML096W	2	1	20.82	0.471219	0.645122	1.88104	eap1∆	WT
YHR005C-A	2	2	116.07	0.471733	0.645373	1.11595	WT	eap1∆
YAL062W	12	2	454.72	0.472144	0.645484	1.20908	eap1∆	WT
YNR046W	3	1	104.21	0.473145	0.646068	1.11291	WT	eap1∆
YIL041W	16	14	718.55	0.473813	0.646068	1.05381	WT	eap1∆
YPL048W	19	11	781.26	0.473992	0.646068	1.06727	WT	eap1∆
YMR296C	4	3	133.02	0.474276	0.646068	3.08776	eap1∆	WT
YCR093W	16	10	216.51	0.474477	0.646068	1.0683	WT	eap1∆
YCL045C	9	2	183.31	0.474726	0.646068	1.16967	eap1∆	WT
YDR486C	4	3	66.56	0.475101	0.646068	1.93486	eap1∆	WT
YHR076W	6	3	71.52	0.475215	0.646068	1.24831	eap1∆	WT
YDL205C	6	3	94.09	0.475604	0.646147	1.09237	eap1∆	WT
YHR137C-A	2	2	26.59	0.476461	0.646863	1.07308	WT	eap1∆
YER026C	2	2	107.48	0.476817	0.646895	1.02168	WT	eap1∆
YIL043C	11	9	264.25	0.477965	0.647581	1.08367	eap1∆	WT
YDR427W	16	12	330.55	0.477985	0.647581	2.38073	eap1∆	WT
YKL007W	9	7	229.24	0.478786	0.647862	1.18238	WT	eap1∆
YOL133W	1	1	36.38	0.478855	0.647862	1.46858	eap1∆	WT
YOR086C	19	9	520	0.480952	0.650249	1.33623	eap1∆	WT
YHL034C	10	7	330.83	0.482195	0.65148	1.10751	eap1∆	WT
YJL168C	10	2	66.87	0.483966	0.652782	1.14883	WT	eap1∆
YJL217W	9	6	320.52	0.484085	0.652782	1.26185	eap1∆	WT
YGR087C	9	2	746.01	0.484161	0.652782	1.09493	WT	eap1∆
YMR011W	3	2	61.19	0.486353	0.653742	1.16202	WT	eap1∆
YGR111W	4	4	91.46	0.486409	0.653742	1.08327	WT	eap1∆
YDR289C	7	2	121.32	0.486438	0.653742	1.12051	WT	eap1∆
YPR052C	4	2	139.92	0.486516	0.653742	1.11509	WT	eap1∆
YNL059C	6	3	76.17	0.486544	0.653742	1.16568	WT	eap1∆
YNL154C	4	3	108.85	0.488511	0.655934	1.16768	WT	eap1∆
YJL045W	3	1	51.21	0.489039	0.656191	1.07942	WT	eap1∆
YFL014W	8	6	780.31	0.490079	0.657136	1.0807	WT	eap1∆
YLR314C	15	8	564.09	0.491039	0.657972	1.11817	eap1∆	WT
YGL041W-A	1	1	15.76	0.492468	0.659435	1.22822	WT	eap1∆
YKL080W	16	14	862.98	0.493441	0.660086	1.05409	WT	eap1∆
YGL171W	7	3	136.12	0.493669	0.660086	1.07987	WT	eap1∆
YDR032C	5	4	297.63	0.493988	0.660086	1.10164	eap1∆	WT
YDL103C	18	13	469.48	0.494305	0.660086	1.09629	eap1∆	WT
YDR496C	12	7	178.43	0.495622	0.661393	2.47535	eap1∆	WT
YKR003W	7	1	49.75	0.496501	0.662115	1.03351	WT	eap1∆
YDL083C	11	8	559.21	0.499401	0.665528	1.05969	WT	eap1∆
YBR252W	6	3	127.32	0.50012	0.666032	1.09114	WT	eap1∆
YGR119C	2	1	46.17	0.500528	0.666122	3.74032	WT	eap1∆
YMR080C	8	4	50.55	0.502142	0.667815	1.17226	WT	eap1∆
YLR438C-A	1	1	15.78	0.503873	0.669042	1.21359	eap1∆	WT
YKL077W	4	3	25.07	0.503976	0.669042	1.12885	eap1∆	WT
YPL225W	10	7	554.29	0.504123	0.669042	1.05975	WT	eap1∆
YER112W	5	3	126.96	0.504434	0.669042	2.51487	eap1∆	WT
YDR267C	3	3	45.34	0.504953	0.669277	1.08883	WT	eap1∆
YDL137W	14	2	753.15	0.506661	0.670503	1.0921	WT	eap1∆
YJL179W	7	4	84.94	0.507139	0.670503	1.06371	eap1∆	WT
YNL132W	17	13	394.41	0.50717	0.670503	1.08159	eap1∆	WT
YBR096W	3	2	79.25	0.50725	0.670503	1.23677	eap1∆	WT
YBR245C	18	6	205.42	0.508299	0.671435	1.12644	WT	eap1∆
YCR031C	11	10	659.14	0.511669	0.675431	1.06822	eap1∆	WT
YMR214W	5	1	91.79	0.516102	0.680823	1.16395	WT	eap1∆
YHR021C	5	5	278.91	0.516522	0.680918	1.08349	WT	eap1∆
YHR053C	1	1	65.38	0.517598	0.681876	1.12951	WT	eap1∆
YPL215W	8	4	78.94	0.519199	0.683525	18.6643	eap1∆	WT
YNL173C	6	3	135.49	0.521667	0.686024	1.19139	WT	eap1∆
YFL038C	8	4	284.55	0.521799	0.686024	1.28402	eap1∆	WT
YGR195W	3	2	44.49	0.522345	0.68628	1.095	WT	eap1∆
YJL069C	5	3	106.1	0.524284	0.687931	1.12858	WT	eap1∆
YOL120C	9	3	463.28	0.524305	0.687931	1.05721	WT	eap1∆
YKR016W	10	7	374.02	0.52515	0.688577	1.51512	eap1∆	WT
YDL121C	2	1	34.01	0.525995	0.689222	2.7241	WT	eap1∆
YNL014W	18	2	913.16	0.526963	0.690028	1.1825	eap1∆	WT
YLR118C	3	3	153.62	0.527517	0.690291	1.08909	WT	eap1∆
YKL184W	7	2	51.27	0.528676	0.691345	1.08958	eap1∆	WT
YMR152W	5	3	45.02	0.530478	0.693238	24.9851	eap1∆	WT
YDR177W	5	5	126.59	0.533017	0.696091	1.05806	WT	eap1∆
YOR155C	5	3	72.13	0.535027	0.69825	1.21297	eap1∆	WT
YPR088C	7	3	130.68	0.538677	0.702267	1.08318	eap1∆	WT
YNL271C	17	2	98.73	0.539097	0.702267	1.24094	eap1∆	WT
YFL008W	13	6	61.93	0.539183	0.702267	1.18436	eap1∆	WT
YMR203W	3	3	95.53	0.540976	0.704134	1.0984	WT	eap1∆
YOL040C	8	6	598.96	0.541816	0.704758	1.05338	eap1∆	WT
YBR218C	39	11	1606.77	0.542345	0.704976	1.29392	WT	eap1∆
YIL121W	3	2	91.75	0.545158	0.708163	1.57106	WT	eap1∆
YGR210C	9	7	216.96	0.546049	0.708849	1.60348	WT	eap1∆
YPL020C	10	2	71.8	0.546579	0.709066	1.03157	WT	eap1∆
YLR378C	6	3	112.8	0.548174	0.710663	1.19823	eap1∆	WT
YGL190C	6	3	62.12	0.549204	0.711526	1.10462	WT	eap1∆
YOR167C	4	3	241.84	0.550373	0.712252	1.10364	eap1∆	WT
YJL173C	2	2	114.9	0.550492	0.712252	1.05513	WT	eap1∆
YDR161W	4	2	63.79	0.552983	0.715001	1.64264	eap1∆	WT
YHR003C	5	1	48.46	0.553487	0.715179	1.06968	eap1∆	WT
YBR214W	4	2	79.18	0.555223	0.716949	1.57129	eap1∆	WT
YKL180W	12	1	851	0.556493	0.717759	1.04859	WT	eap1∆
YNL208W	6	5	357.62	0.556826	0.717759	1.08161	eap1∆	WT
YDR382W	9	9	713.43	0.556952	0.717759	1.06611	eap1∆	WT
YDR392W	5	2	77.45	0.558435	0.719036	1.80173	eap1∆	WT
YLR221C	5	1	57.2	0.558912	0.719036	1.08271	WT	eap1∆
YKR072C	4	1	50.09	0.559106	0.719036	1.68526	WT	eap1∆
YNL182C	4	4	31.92	0.559778	0.719036	1.1088	WT	eap1∆
YBR017C	3	1	107.06	0.559782	0.719036	1.06603	WT	eap1∆
YJL024C	1	1	29.73	0.562985	0.721536	1.04852	WT	eap1∆
YBR041W	6	2	37.56	0.563183	0.721536	1.02454	WT	eap1∆
YOL004W	12	7	72.69	0.563936	0.721536	1.12192	WT	eap1∆
YFL037W	13	12	514.41	0.564018	0.721536	1.04505	WT	eap1∆
YCL035C	6	6	347.22	0.564102	0.721536	1.0458	WT	eap1∆
YPL235W	9	6	297.93	0.564655	0.721536	1.63043	eap1∆	WT
YPR034W	6	1	73.37	0.564822	0.721536	1.17365	WT	eap1∆
YBL068W	10	3	238.74	0.564878	0.721536	1.05734	WT	eap1∆
YIR022W	4	4	150.43	0.56505	0.721536	1.09879	WT	eap1∆
YJR017C	6	4	217.52	0.566505	0.722571	1.13232	eap1∆	WT
YER007C-A	6	4	204.41	0.566828	0.722571	1.08145	WT	eap1∆
YKL164C	4	1	104.09	0.566968	0.722571	1.05592	eap1∆	WT
YNL088W	15	3	112.17	0.567898	0.723284	1.21541	WT	eap1∆
YMR275C	7	2	53.05	0.568622	0.723735	1.92746	eap1∆	WT
YLR222C	6	4	76.89	0.569678	0.724607	1.08939	WT	eap1∆
YER056C	3	3	191.55	0.570855	0.725632	1.25848	eap1∆	WT
YOR091W	6	4	176.9	0.571707	0.726131	1.33738	eap1∆	WT
YKL214C	1	1	64.91	0.571991	0.726131	1.10164	WT	eap1∆
YDR101C	17	13	468.36	0.572575	0.726401	1.05477	eap1∆	WT
YGL203C	5	4	45.47	0.574173	0.727442	1.30332	eap1∆	WT
YLR290C	2	1	17.42	0.574232	0.727442	1.10125	eap1∆	WT
YDR365C	7	4	109.31	0.574512	0.727442	3.4203	eap1∆	WT
YGL101W	5	4	81.97	0.575239	0.727891	1.07185	WT	eap1∆
YNL219C	3	3	79.02	0.576125	0.72808	1.32513	WT	eap1∆
YDR098C;YER174C	7	6	207.44	0.576133	0.72808	1.07121	WT	eap1∆
YMR276W	8	7	220.96	0.576989	0.728525	1.17983	eap1∆	WT
YKL142W	11	8	623.96	0.57723	0.728525	1.05657	eap1∆	WT
YDR148C	6	5	234.27	0.577888	0.728842	1.05464	WT	eap1∆
YHR099W	22	5	167.91	0.578227	0.728842	4.71802	eap1∆	WT
YOR207C	16	7	194.54	0.578832	0.729135	1.0698	WT	eap1∆
YKL028W	8	4	91.2	0.581563	0.731812	1.28182	WT	eap1∆
YDR284C	2	1	32.72	0.581707	0.731812	1.16073	eap1∆	WT
YNL308C	12	6	191.77	0.584611	0.734993	1.06732	eap1∆	WT
YML070W	20	17	845.31	0.586721	0.737071	1.04128	WT	eap1∆
YNR051C	6	3	31.35	0.587042	0.737071	1.05109	eap1∆	WT
YDR493W	4	2	52.81	0.587785	0.737071	1.27739	eap1∆	WT
YKL212W	16	14	554.93	0.587902	0.737071	1.08377	WT	eap1∆
YLR150W	14	11	753.21	0.588149	0.737071	1.04269	WT	eap1∆
YNL200C	4	3	113.69	0.590706	0.739802	1.04855	WT	eap1∆
YOR276W	4	4	91.93	0.591738	0.740619	1.05306	WT	eap1∆
YNL287W	20	18	789.04	0.59317	0.741128	1.03094	WT	eap1∆
YDL145C	32	26	925.58	0.593233	0.741128	1.03296	WT	eap1∆
YBR056W	7	3	167.73	0.593281	0.741128	1.03595	WT	eap1∆
YOR281C	4	2	150.96	0.594951	0.741511	1.11115	eap1∆	WT
YDL237W	1	1	17.25	0.596101	0.741511	3.07439	WT	eap1∆
YFL007W	22	9	213.57	0.596142	0.741511	1.11961	eap1∆	WT
YDR285W	11	1	62.07	0.5963	0.741511	1.35366	eap1∆	WT
YGL238W	9	7	229.27	0.596305	0.741511	1.08423	WT	eap1∆
YCL040W	20	13	698.88	0.596464	0.741511	1.0813	eap1∆	WT
YAR002W	6	5	102.24	0.596475	0.741511	1.05929	WT	eap1∆
YGL224C	3	2	35.55	0.596622	0.741511	3.79893	eap1∆	WT
YCL043C	25	19	1411.02	0.599069	0.744079	1.03795	WT	eap1∆
YMR002W	1	1	39.5	0.601261	0.746327	1.22456	eap1∆	WT
YGL008C	42	10	2113.58	0.604549	0.749656	1.22053	WT	eap1∆
YJL164C	2	1	57.51	0.60471	0.749656	1.33651	WT	eap1∆
YHR060W	5	2	87.48	0.605998	0.750778	11.1956	eap1∆	WT
YOR328W	8	2	172.63	0.606558	0.750995	1.23768	eap1∆	WT
YKL144C	1	1	13.26	0.607749	0.751993	1.42365	WT	eap1∆
YJR047C	4	1	116.36	0.609978	0.754273	2.7213	eap1∆	WT
YLR262C	5	2	162.92	0.610793	0.754804	1.84226	eap1∆	WT
YGL039W	5	4	87.38	0.611646	0.755381	1.03228	WT	eap1∆
YOR316C	4	3	112.35	0.614266	0.757793	1.04311	WT	eap1∆
YMR260C	7	4	313.82	0.614374	0.757793	1.04434	WT	eap1∆
YLR325C	5	3	273.77	0.615416	0.758599	1.03539	eap1∆	WT
YGL022W	5	3	144.12	0.617369	0.76041	1.11763	WT	eap1∆
YML008C	13	12	691.02	0.617663	0.76041	1.11799	WT	eap1∆
YLR448W	16	2	718.97	0.619252	0.761722	1.04241	eap1∆	WT
YLR192C	7	6	389.59	0.619508	0.761722	1.0255	WT	eap1∆
YMR221C	4	1	54.13	0.620161	0.762045	4.72956	eap1∆	WT
YKR048C	10	10	612.4	0.624572	0.766688	1.06699	eap1∆	WT
YBR130C	3	1	74.64	0.624788	0.766688	1.49905	eap1∆	WT
YDL190C	10	4	124.58	0.625115	0.766688	1.20455	eap1∆	WT
YLR348C	8	4	198.52	0.626042	0.767343	1.09405	eap1∆	WT
YHR068W	19	16	822.57	0.627468	0.76861	1.03769	WT	eap1∆
YPL199C	3	2	59.5	0.628343	0.769198	1.53586	WT	eap1∆
YCR081C-A	2	2	16.17	0.628978	0.769494	1.10348	eap1∆	WT
YDL022W	9	7	667.35	0.630087	0.770369	1.04055	WT	eap1∆
YGR281W	19	6	94.12	0.630797	0.770755	1.02729	eap1∆	WT
YOL151W	14	11	471.25	0.631733	0.771416	1.09738	eap1∆	WT
YGR282C	8	6	439.5	0.6328	0.772153	1.04062	eap1∆	WT
YBR126W-A	3	1	23.65	0.633126	0.772153	3.70324	WT	eap1∆
YKL093W	2	1	21.54	0.636514	0.775153	2.06905	eap1∆	WT
YPR154W	2	2	89.96	0.636679	0.775153	1.19731	eap1∆	WT
YMR285C	3	1	29.4	0.636775	0.775153	1.15899	WT	eap1∆
YHR001W	7	3	67.63	0.637368	0.775391	1.19377	eap1∆	WT
YML016C	5	3	29.61	0.638954	0.776837	7.12462	eap1∆	WT
YGL054C	1	1	71.78	0.639492	0.777009	1.04499	WT	eap1∆
YER006W	11	8	433.85	0.641467	0.778621	1.03251	WT	eap1∆
YDL052C	5	2	53.81	0.641616	0.778621	1.02551	eap1∆	WT
YDL198C	12	7	271.39	0.642151	0.778788	1.17309	eap1∆	WT
YER001W	2	1	30.55	0.642786	0.779075	1.15628	WT	eap1∆
YGR240C	59	47	3527.64	0.645178	0.781489	1.02162	eap1∆	WT
YOL094C	7	5	78.42	0.646074	0.781726	1.23621	WT	eap1∆
YER146W	2	2	97.85	0.646173	0.781726	1.08064	WT	eap1∆
YOR099W	5	4	168.55	0.647308	0.782614	1.49255	eap1∆	WT
YEL051W	9	7	177.55	0.64885	0.78382	1.01145	WT	eap1∆
YOR157C	5	4	139.71	0.649107	0.78382	1.10156	eap1∆	WT
YDR064W	11	10	596.26	0.650507	0.785025	1.12214	eap1∆	WT
YOR065W	2	2	74.06	0.652012	0.785075	1.09555	eap1∆	WT
YOR332W	15	13	775.73	0.652057	0.785075	1.02887	WT	eap1∆
YNL052W	3	2	66.83	0.652106	0.785075	1.16488	eap1∆	WT
YDL143W	18	12	431.6	0.652154	0.785075	1.05181	eap1∆	WT
YNR016C	96	77	3665.09	0.65297	0.785574	1.02462	WT	eap1∆
YGR208W	6	6	217.03	0.655088	0.787554	1.08973	eap1∆	WT
YDR380W	2	1	19.05	0.655423	0.787554	1.0636	eap1∆	WT
YGL027C	10	6	192.34	0.656036	0.787808	1.03515	WT	eap1∆
YOR321W	4	1	63.52	0.656581	0.787977	1.00016	WT	eap1∆
YBR085C-A	4	3	194.88	0.65974	0.79121	1.04721	WT	eap1∆
YML094W	6	4	132.95	0.660083	0.79121	1.0229	WT	eap1∆
YBL015W	4	3	82.22	0.661191	0.792051	1.09708	eap1∆	WT
YHR201C	10	8	168.84	0.661743	0.792227	1.08088	eap1∆	WT
YDR188W	18	13	816.68	0.662157	0.792238	1.02804	eap1∆	WT
YDR322C-A	3	1	23.25	0.662967	0.792722	2.35859	eap1∆	WT
YPL146C	8	3	82.15	0.66369	0.793047	1.04142	WT	eap1∆
YAL060W	6	4	115.45	0.66405	0.793047	1.08298	WT	eap1∆
YHL033C	25	5	1426.61	0.667271	0.796191	1.0214	eap1∆	WT
YPL098C	1	1	17.43	0.667497	0.796191	1.22855	WT	eap1∆
YBR273C	6	2	50.74	0.668592	0.797011	1.05707	WT	eap1∆
YOR063W	34	25	1707.99	0.670516	0.798817	1.03257	WT	eap1∆
YGR083C	10	5	109.52	0.673999	0.802477	1.04058	WT	eap1∆
YPL079W	10	1	416.46	0.674705	0.802829	1.1922	eap1∆	WT
YMR205C	34	28	1715.5	0.675334	0.803089	1.03206	WT	eap1∆
YMR208W	7	5	266.14	0.678299	0.805163	1.11421	WT	eap1∆
YDR272W	5	4	165.46	0.678557	0.805163	1.0567	WT	eap1∆
YBR269C	3	3	85.79	0.678557	0.805163	1.03089	WT	eap1∆
YBL002W	8	5	293.57	0.678726	0.805163	1.37297	eap1∆	WT
YGR269W	2	1	20.24	0.681138	0.807535	1.00734	WT	eap1∆
YLR025W	5	3	99.76	0.68362	0.809633	1.29034	eap1∆	WT
YLR421C	4	4	86.62	0.683736	0.809633	1.03081	WT	eap1∆
YDR168W	19	12	364.92	0.684408	0.809938	1.06847	WT	eap1∆
YGR080W	8	7	240.29	0.685026	0.810179	1.05037	WT	eap1∆
YLR409C	8	4	127.75	0.686254	0.810511	1.08	eap1∆	WT
YFL005W	10	7	350.38	0.686826	0.810511	1.02946	WT	eap1∆
YKR057W	8	1	513.38	0.68683	0.810511	1.01773	WT	eap1∆
YKL193C	7	4	166.62	0.686965	0.810511	1.13079	eap1∆	WT
YMR145C	10	4	132.62	0.687699	0.810754	1.46352	eap1∆	WT
YIL155C	8	4	134.86	0.688	0.810754	1.0355	WT	eap1∆
YNL181W	11	5	76.22	0.688639	0.811017	1.07131	WT	eap1∆
YAL046C	2	2	48.99	0.689495	0.811151	1.00165	eap1∆	WT
YOR014W	1	1	21.15	0.68981	0.811151	1.03878	eap1∆	WT
YGL123W	19	13	891.28	0.689997	0.811151	1.026	WT	eap1∆
YNL067W	14	2	781.28	0.690667	0.811451	1.24631	eap1∆	WT
YNL255C	6	5	284.97	0.692943	0.813636	1.03824	eap1∆	WT
YNL035C	2	1	29.54	0.69465	0.815151	1.03424	eap1∆	WT
YMR049C	7	7	272.24	0.696506	0.816839	1.02572	WT	eap1∆
YER155C	15	5	156.07	0.698409	0.818343	1.00408	WT	eap1∆
YGR034W	13	2	600.3	0.698627	0.818343	1.07068	WT	eap1∆
YGL200C	4	4	127.75	0.700447	0.819984	1.31579	eap1∆	WT
YBR156C	7	1	52.26	0.701256	0.82044	1.48632	WT	eap1∆
YPL101W	2	1	44.96	0.703194	0.822216	1.18454	eap1∆	WT
YML110C	6	4	64.83	0.705962	0.824958	1.05369	eap1∆	WT
YKL190W	3	2	55.56	0.70721	0.825729	1.05763	WT	eap1∆
YJL193W	1	1	16.79	0.707466	0.825729	2.54065	eap1∆	WT
YJR133W	5	3	90.76	0.708297	0.826206	1.02079	WT	eap1∆
YOR327C	3	2	48.96	0.709115	0.826582	1.11503	WT	eap1∆
YNL197C	3	2	33.73	0.709465	0.826582	1.08384	WT	eap1∆
YDR170W-A	7	1	239.38	0.713195	0.830433	1.33813	WT	eap1∆
YBL007C	13	6	240.95	0.714282	0.831203	1.03688	eap1∆	WT
YOR158W	2	1	29.81	0.715088	0.831646	1.00738	eap1∆	WT
YDR299W	5	4	85.91	0.717347	0.833777	1.08735	WT	eap1∆
YDL225W	8	5	175.97	0.720159	0.836379	1.11891	eap1∆	WT
YLL008W	12	5	198.04	0.720441	0.836379	1.07018	WT	eap1∆
YNL243W	17	9	477.59	0.721586	0.836746	2.03513	WT	eap1∆
YDR119W	2	1	42.22	0.721614	0.836746	4.54237	WT	eap1∆
YKR025W	3	3	82.2	0.722498	0.836934	1.04709	eap1∆	WT
YIL088C	3	1	59.96	0.722631	0.836934	1.26256	WT	eap1∆
YOR253W	2	2	137.78	0.724017	0.837236	1.22138	eap1∆	WT
YOR363C	6	1	47.81	0.724029	0.837236	1.02361	eap1∆	WT
YJL122W	3	1	75.85	0.724661	0.837236	1.02962	WT	eap1∆
YNL175C	9	8	148.35	0.724918	0.837236	1.05991	WT	eap1∆
YML063W	29	3	1232.04	0.725033	0.837236	1.02958	eap1∆	WT
YOR160W	2	2	38.66	0.726087	0.837958	1.36176	eap1∆	WT
YOR196C	2	1	36.27	0.727819	0.839461	1.81569	WT	eap1∆
YLR066W	2	2	44.29	0.728449	0.839692	1.17153	eap1∆	WT
YDL125C	6	4	306.13	0.728947	0.839771	1.02836	WT	eap1∆
YGL078C	14	11	306.24	0.732336	0.843178	1.02988	WT	eap1∆
YML024W	11	9	802.35	0.732768	0.843179	1.02153	eap1∆	WT
YGL125W	14	9	484.64	0.735122	0.844602	1.34201	eap1∆	WT
YKL191W	6	3	94.65	0.735231	0.844602	1.28938	eap1∆	WT
YPR083W	5	2	25.65	0.735605	0.844602	1.14595	eap1∆	WT
YJL180C	4	4	27.14	0.735733	0.844602	1.02139	eap1∆	WT
YHR205W	4	1	30.39	0.736336	0.844799	1.25343	WT	eap1∆
YKL165C	3	3	40.94	0.736959	0.84489	1.07587	eap1∆	WT
YHR091C	6	2	100.28	0.73728	0.84489	1.25364	eap1∆	WT
YBL022C	9	7	150.68	0.738618	0.845805	1.02307	eap1∆	WT
YNL323W	5	5	73.81	0.738944	0.845805	1.099	eap1∆	WT
YBR160W	6	4	111.09	0.741125	0.847311	1.01076	WT	eap1∆
YKL151C	4	2	65.25	0.741158	0.847311	1.06246	eap1∆	WT
YMR250W	5	3	112.11	0.741559	0.847311	1.32831	eap1∆	WT
YHR182W	14	7	118.01	0.744413	0.850074	1.0936	eap1∆	WT
YLR418C	10	5	162.37	0.746122	0.851447	1.64147	WT	eap1∆
YJR117W	8	7	249.22	0.746486	0.851447	1.14269	WT	eap1∆
YGL153W	7	5	180.12	0.747212	0.851778	1.6528	WT	eap1∆
YLR100W	2	1	80.41	0.748229	0.85244	1.08744	eap1∆	WT
YGL246C	3	2	135.56	0.749802	0.853735	1.15854	WT	eap1∆
YOR202W	4	3	58.2	0.751148	0.85477	1.5914	eap1∆	WT
YLR447C	11	11	404.93	0.754246	0.857796	1.0373	eap1∆	WT
YJR125C	3	3	53.97	0.754925	0.858069	1.03366	eap1∆	WT
YKL073W	6	3	111.64	0.755458	0.858176	1.13084	eap1∆	WT
YLR335W	15	11	354.47	0.756053	0.858353	1.11283	eap1∆	WT
YDL112W	13	8	154.05	0.758854	0.861033	1.08496	eap1∆	WT
YOR211C	11	3	76.11	0.76098	0.862918	1.02906	WT	eap1∆
YGR020C	6	5	162.76	0.761398	0.862918	1.01473	WT	eap1∆
YPL217C	10	6	134.53	0.761873	0.862956	1.07315	eap1∆	WT
YCR012W	39	32	3130.49	0.76392	0.864774	1.02182	WT	eap1∆
YNL316C	3	2	62.89	0.764592	0.865033	1.44314	eap1∆	WT
YOR293W	9	7	440.31	0.765037	0.865036	1.00845	WT	eap1∆
YDL235C	8	6	263.13	0.766676	0.866388	1.11838	WT	eap1∆
YKL021C	8	2	121.21	0.767185	0.866463	1.06541	eap1∆	WT
YKR001C	23	17	539.91	0.768742	0.86772	1.18641	eap1∆	WT
YDR002W	11	5	256.62	0.769337	0.867891	1.02524	eap1∆	WT
YNL307C	14	9	363.68	0.770039	0.868181	1.02451	eap1∆	WT
YER063W	6	3	228.81	0.770893	0.868291	1.02116	eap1∆	WT
YBR171W	2	2	33.17	0.771025	0.868291	1.86309	eap1∆	WT
YMR110C	4	2	31.16	0.774876	0.871366	1.39742	eap1∆	WT
YOR117W	18	13	502.55	0.77503	0.871366	1.02591	eap1∆	WT
YJR099W	2	1	21.08	0.775271	0.871366	1.02115	WT	eap1∆
YOR151C	18	12	323.87	0.775538	0.871366	1.0332	eap1∆	WT
YPR160W	15	12	422.12	0.776361	0.87179	1.07773	eap1∆	WT
YMR202W	3	3	152.36	0.778931	0.874173	1.6372	eap1∆	WT
YOL006C	9	3	70.2	0.779427	0.874228	1.04011	eap1∆	WT
YGL223C	2	2	25.8	0.780344	0.874755	1.61823	WT	eap1∆
YJL171C	3	3	71.06	0.783783	0.878106	1.16559	eap1∆	WT
YJR073C	2	2	79.77	0.784335	0.878221	1.173	eap1∆	WT
YDR293C	15	12	371.47	0.784908	0.87836	1.00377	WT	eap1∆
YHR135C	2	2	75.72	0.786751	0.879586	1.45868	eap1∆	WT
YDL236W	6	5	182.91	0.787475	0.879586	1.64259	eap1∆	WT
YMR297W	9	8	234.29	0.788445	0.879586	1.09412	eap1∆	WT
YOR046C	13	11	539.66	0.788685	0.879586	1.05358	eap1∆	WT
YER029C	3	2	36.72	0.788896	0.879586	1.03888	WT	eap1∆
YMR008C	2	1	45.94	0.789092	0.879586	1.72844	WT	eap1∆
YDL047W	7	5	104.34	0.789153	0.879586	1.07641	eap1∆	WT
YNL069C	20	8	705.5	0.793209	0.883166	1.02673	eap1∆	WT
YLR186W	6	5	217.83	0.793268	0.883166	1.02193	eap1∆	WT
YKR093W	3	1	20.16	0.794526	0.883532	1.05873	WT	eap1∆
YGR085C	10	7	440.94	0.794862	0.883532	1.01904	eap1∆	WT
YGL092W	10	5	119.17	0.794953	0.883532	1.94863	eap1∆	WT
YNL206C	4	2	26.37	0.79575	0.883783	2.08248	eap1∆	WT
YGL037C	6	5	178.37	0.796082	0.883783	1.06655	eap1∆	WT
YFR021W	3	1	39.02	0.797835	0.885226	1.01291	eap1∆	WT
YCR073W-A	5	4	189.29	0.799152	0.885718	1.08357	eap1∆	WT
YOR224C	5	4	225.83	0.799185	0.885718	1.00377	eap1∆	WT
YOR241W	6	1	59.4	0.800493	0.886665	1.41291	eap1∆	WT
YKL024C	14	7	419.02	0.801567	0.887352	1.28325	eap1∆	WT
YMR027W	18	10	518.66	0.802998	0.887482	1.0278	WT	eap1∆
YPL274W	1	1	26.5	0.80316	0.887482	1.72588	WT	eap1∆
YDR477W	8	3	96.4	0.803445	0.887482	1.0306	eap1∆	WT
YDL188C	8	7	215.66	0.803501	0.887482	1.07871	eap1∆	WT
YGL016W	5	1	39.38	0.806353	0.890129	1.05532	WT	eap1∆
YGL252C	10	4	197.06	0.806878	0.890207	1.02962	WT	eap1∆
YPL243W	12	9	471.94	0.807755	0.890672	1.16308	WT	eap1∆
YKL128C	4	4	61.02	0.809536	0.892133	1.08364	WT	eap1∆
YLR359W	27	19	1018.7	0.810537	0.892732	1.01625	eap1∆	WT
YLR406C	10	1	526.79	0.813181	0.89514	1.01052	WT	eap1∆
YKL068W	2	1	16.14	0.814695	0.895267	1.02984	eap1∆	WT
YDR348C	4	1	83.36	0.814735	0.895267	1.33516	WT	eap1∆
YLR340W	18	15	815.89	0.814741	0.895267	1.02989	eap1∆	WT
YLR022C	5	2	59.53	0.815128	0.895267	1.05322	eap1∆	WT
YIL114C	2	1	21.46	0.817125	0.896956	2.28466	eap1∆	WT
YOR061W	8	7	168.42	0.82014	0.898997	1.01903	eap1∆	WT
YHR137W	2	2	56.21	0.820267	0.898997	1.17915	WT	eap1∆
YGR253C	9	8	360.87	0.820364	0.898997	1.03135	WT	eap1∆
YFR010W	10	9	283.56	0.82111	0.899157	1.01419	WT	eap1∆
YML012W	5	4	191.53	0.82143	0.899157	1.15115	WT	eap1∆
YLR387C	6	3	29.44	0.825173	0.902749	1.03485	WT	eap1∆
YLR220W	3	2	61.79	0.827642	0.903723	1.04728	eap1∆	WT
YEL054C	12	9	771.43	0.827667	0.903723	1.01019	WT	eap1∆
YNL178W	24	18	1496.52	0.827854	0.903723	1.01663	WT	eap1∆
YLL023C	1	1	46.95	0.827912	0.903723	1.5448	WT	eap1∆
YDL174C	6	4	119.16	0.829977	0.905471	1.18058	WT	eap1∆
YIL033C	10	8	205.64	0.831941	0.907108	1.01372	eap1∆	WT
YLR433C	4	3	39.09	0.834777	0.909693	1.03367	eap1∆	WT
YLR450W	3	1	33.29	0.836183	0.910717	1.5894	eap1∆	WT
YER031C	7	4	355.55	0.836819	0.910814	1.06283	eap1∆	WT
YKR008W	8	2	74.13	0.837419	0.910814	1.8539	eap1∆	WT
YMR269W	3	2	108.59	0.837691	0.910814	1.51703	WT	eap1∆
YML085C	10	7	453.59	0.838135	0.910814	1.00752	WT	eap1∆
YPR072W	12	6	145.64	0.838703	0.910925	1.02473	WT	eap1∆
YDL229W	41	2	2866.13	0.844155	0.916337	1.00651	WT	eap1∆
YLR258W	6	5	186.3	0.846164	0.918004	1.06381	WT	eap1∆
YJR074W	2	2	102.89	0.84663	0.918004	1.03041	eap1∆	WT
YOL095C	6	1	42.3	0.847565	0.918509	1.94147	WT	eap1∆
YDL082W	10	1	466.35	0.848461	0.918657	2.1786	eap1∆	WT
YCR083W	5	5	135.19	0.848642	0.918657	1.21531	WT	eap1∆
YOR163W	3	3	84.72	0.850804	0.920488	1.02153	WT	eap1∆
YBR291C	4	1	68.37	0.852633	0.921956	1.10899	eap1∆	WT
YDR321W	8	8	286.89	0.853367	0.92224	1.01014	eap1∆	WT
YIL078W	38	33	1794.23	0.854552	0.922736	1.01439	eap1∆	WT
YBL072C	11	10	685.07	0.855063	0.922736	1.00716	WT	eap1∆
YDR012W	19	2	1453.04	0.85539	0.922736	1.08141	eap1∆	WT
YML069W	14	8	385.7	0.855714	0.922736	1.04797	WT	eap1∆
YBL055C	2	1	35.25	0.856764	0.923133	1.11195	eap1∆	WT
YNR007C	3	1	56.01	0.857026	0.923133	1.13075	eap1∆	WT
YPL091W	19	11	594.04	0.858486	0.924196	1.00476	WT	eap1∆
YJR068W	8	2	116.78	0.859315	0.92458	1.10597	eap1∆	WT
YBR034C	6	3	105.09	0.86207	0.927034	1.10481	eap1∆	WT
YER094C	5	2	303.05	0.863326	0.927798	1.01037	WT	eap1∆
YBR025C	28	21	1260.88	0.864178	0.927798	1.01279	eap1∆	WT
YDR363W-A	1	1	60.43	0.864205	0.927798	1.07476	eap1∆	WT
YML130C	6	6	182.16	0.864846	0.927922	1.20425	eap1∆	WT
YHR087W	5	4	309.93	0.865871	0.927922	1.01925	eap1∆	WT
YOL092W	2	1	59.08	0.866346	0.927922	1.15954	WT	eap1∆
YBR287W	1	1	51.63	0.86635	0.927922	1.42212	eap1∆	WT
YKR078W	7	2	55.51	0.866987	0.927922	7.29582	eap1∆	WT
YLL034C	9	6	68.36	0.867168	0.927922	1.24568	WT	eap1∆
YKL143W	3	2	74.72	0.869427	0.92983	1.03638	eap1∆	WT
YPR173C	8	3	64.43	0.870757	0.930744	1.02116	eap1∆	WT
YOL052C	4	4	76.75	0.871883	0.931097	1.05418	eap1∆	WT
YAL059W	4	1	118	0.87204	0.931097	1.00683	eap1∆	WT
YKL157W	31	25	1394.4	0.872676	0.931267	1.02346	eap1∆	WT
YEL024W	2	1	100.02	0.873293	0.931417	1.11741	WT	eap1∆
YBR009C	5	5	263.59	0.875706	0.933482	1.00168	eap1∆	WT
YNL071W	13	9	460.74	0.877904	0.935256	1.07859	eap1∆	WT
YJR135W-A	4	2	128.62	0.878327	0.935256	1.03009	eap1∆	WT
YHR088W	3	2	48.15	0.879696	0.936083	1.04812	eap1∆	WT
YML125C	7	6	341.49	0.880062	0.936083	1.16987	eap1∆	WT
YLR196W	9	6	372.71	0.88123	0.936477	1.00343	WT	eap1∆
YGR086C	16	11	1004.76	0.88139	0.936477	1.01823	eap1∆	WT
YFL059W	9	1	201.54	0.88198	0.936595	1.01127	eap1∆	WT
YOR210W	4	3	102.14	0.88265	0.936797	1.01664	WT	eap1∆
YNL118C	10	4	109.71	0.884697	0.93846	1.00073	WT	eap1∆
YGR175C	7	1	102.32	0.887037	0.940432	2.79993	WT	eap1∆
YNL265C	4	1	63.65	0.889619	0.942659	1.04917	eap1∆	WT
YPL266W	8	3	133.57	0.890632	0.943221	1.19995	eap1∆	WT
YNL016W	9	6	171.1	0.892114	0.944279	1.08421	eap1∆	WT
YOR103C	3	3	150.4	0.893565	0.945094	1.00601	WT	eap1∆
YGL012W	5	3	73.88	0.893851	0.945094	1.29496	eap1∆	WT
YIL008W	1	1	79.83	0.894516	0.945286	1.1653	WT	eap1∆
YLR249W	66	47	3683.35	0.895986	0.946328	1.00352	eap1∆	WT
YNL268W	4	3	77.13	0.897005	0.946892	2.43633	eap1∆	WT
YBL030C	16	10	712.49	0.898718	0.948188	1.01589	WT	eap1∆
YBR205W	7	4	98.49	0.901076	0.950164	1.14252	eap1∆	WT
YLR292C	2	1	17.9	0.902943	0.951619	1.41811	eap1∆	WT
YPR190C	4	2	70.42	0.903544	0.951739	1.00001	WT	eap1∆
YOR232W	7	6	347.01	0.906376	0.954208	1.02456	eap1∆	WT
YKR014C	7	6	235.44	0.906923	0.954271	1.04659	eap1∆	WT
YGL030W	9	9	734	0.908495	0.955411	1.01383	WT	eap1∆
YJR069C	9	9	384.59	0.909814	0.955821	1.05726	WT	eap1∆
YKL065C	4	2	57.19	0.910315	0.955821	1.48851	eap1∆	WT
YDR500C	2	1	87.03	0.910934	0.955821	1.00638	WT	eap1∆
YDL072C	6	4	149.52	0.911081	0.955821	1.10598	eap1∆	WT
YOL030W	4	4	150.1	0.91133	0.955821	1.13639	WT	eap1∆
YLR259C	30	22	2048.83	0.911884	0.955889	1.01754	eap1∆	WT
YER099C	7	2	180.24	0.913257	0.956482	1.02302	WT	eap1∆
YER009W	3	2	208.33	0.913428	0.956482	1.01542	eap1∆	WT
YNL247W	33	21	909.48	0.914263	0.956844	1.00369	eap1∆	WT
YGR012W	5	2	116.94	0.915878	0.958021	1.42067	WT	eap1∆
YPL240C	46	6	3119.81	0.916569	0.958231	1.02617	eap1∆	WT
YLR060W	24	17	809.84	0.918025	0.95924	1.00219	WT	eap1∆
YMR207C	14	1	223.13	0.920481	0.961293	1.40623	eap1∆	WT
YEL026W	5	4	303.48	0.921084	0.961409	1.02794	WT	eap1∆
YGR143W	2	1	74.48	0.921985	0.961836	15.357	eap1∆	WT
YBR154C	3	2	122.61	0.922853	0.96202	1.27423	eap1∆	WT
YOR126C	2	2	30.04	0.923381	0.96202	1.13098	WT	eap1∆
YML128C	6	5	116.03	0.923638	0.96202	1.08422	WT	eap1∆
YLR048W	13	3	695.8	0.924268	0.962081	1.14389	WT	eap1∆
YDL148C	9	3	136.84	0.92468	0.962081	1.01775	WT	eap1∆
YPL249C-A	10	2	496.15	0.925402	0.962319	1.02583	WT	eap1∆
YLR291C	5	3	89.48	0.926014	0.962444	1.02676	WT	eap1∆
YPR187W	2	2	48.83	0.926595	0.962537	1.02047	WT	eap1∆
YLR032W	3	1	43.83	0.927755	0.963229	1.28243	WT	eap1∆
YLR347C	7	6	174.63	0.929319	0.964341	1.00859	eap1∆	WT
YDL111C	4	2	87.5	0.931192	0.965772	1.49784	WT	eap1∆
YKL120W	13	9	435.21	0.932455	0.966569	1.00262	WT	eap1∆
YLL029W	8	2	61.98	0.9332	0.966828	1.11877	WT	eap1∆
YMR120C	36	21	2110.29	0.938011	0.970263	1.00257	WT	eap1∆
YOR369C	9	9	862.23	0.938137	0.970263	1.00963	eap1∆	WT
YJR145C	22	14	1127.63	0.938682	0.970263	1.00174	WT	eap1∆
YNL075W	1	1	48.08	0.938745	0.970263	1.27369	WT	eap1∆
YLR276C	5	3	121.46	0.938997	0.970263	1.01466	eap1∆	WT
YHR104W	15	11	643.91	0.939808	0.970293	1.00116	eap1∆	WT
YLR431C	6	1	35	0.940617	0.970293	7.95551	eap1∆	WT
YER141W	4	1	97.34	0.941006	0.970293	1.43674	WT	eap1∆
YGL137W	27	24	921.45	0.94101	0.970293	1.00077	WT	eap1∆
YPR172W	3	2	28.65	0.943595	0.970963	1.00385	WT	eap1∆
YBR101C	8	6	137.28	0.943756	0.970963	1.0001	WT	eap1∆
YGR181W	3	3	210.91	0.943999	0.970963	1.1134	eap1∆	WT
YGL040C	7	6	224.64	0.944177	0.970963	1.07867	eap1∆	WT
YDR525W-A	1	1	49.46	0.944309	0.970963	3.07299	WT	eap1∆
YBL041W	7	7	173.8	0.944641	0.970963	1.02323	eap1∆	WT
YGR082W	5	5	202.84	0.945867	0.971713	1.51309	WT	eap1∆
YKL181W	10	7	308.37	0.946634	0.97199	1.1158	eap1∆	WT
YER017C	3	1	36.6	0.947488	0.972357	1.37165	eap1∆	WT
YHR199C	3	1	40.6	0.949558	0.97397	1.44933	WT	eap1∆
YPL085W	16	9	183.5	0.95032	0.97424	1.0269	eap1∆	WT
YPL126W	5	2	57.96	0.953168	0.976648	1.18886	eap1∆	WT
YJR123W	16	14	1023.59	0.954224	0.977217	1.00709	WT	eap1∆
YEL002C	6	6	212.74	0.955537	0.977927	1.74751	eap1∆	WT
YDL081C	2	1	196.8	0.955917	0.977927	1.33892	WT	eap1∆
YPL170W	5	3	136.89	0.956851	0.978114	1.03528	eap1∆	WT
YGR231C	4	3	176.35	0.957101	0.978114	1.65538	WT	eap1∆
YIL034C	6	6	176.15	0.958249	0.978554	1.00138	WT	eap1∆
YIR003W	3	2	51.27	0.958855	0.978554	1.14207	WT	eap1∆
YCL057C-A	3	2	76.92	0.959033	0.978554	1.4199	WT	eap1∆
YBL051C	4	2	64.09	0.960394	0.979432	1.02166	eap1∆	WT
YNL036W	3	1	33.35	0.961568	0.980117	1.26814	eap1∆	WT
YJL033W	6	3	109.42	0.962241	0.980293	1.0721	WT	eap1∆
YNL207W	2	1	79.88	0.963128	0.980685	1.00401	eap1∆	WT
YCL044C	1	1	29.95	0.965991	0.983088	1.08611	WT	eap1∆
YCR072C	7	4	94.61	0.96842	0.984956	1.03993	eap1∆	WT
YDR190C	14	11	342.64	0.968834	0.984956	1.00074	eap1∆	WT
YOR021C	12	10	324.96	0.969969	0.985598	1.07166	eap1∆	WT
YJL008C	19	13	750.71	0.971416	0.986516	1.00438	WT	eap1∆
YLR354C	20	15	1367.96	0.971882	0.986516	1.02097	eap1∆	WT
YKL100C	4	2	96.69	0.973054	0.987193	1.31346	eap1∆	WT
YGL228W	12	5	198.62	0.973808	0.987445	1.15719	WT	eap1∆
YBR199W	3	1	26.76	0.975029	0.988171	1.1002	WT	eap1∆
YJR077C	12	11	492.55	0.976045	0.988607	1.15539	WT	eap1∆
YGR135W	10	7	489.72	0.976471	0.988607	1.00961	eap1∆	WT
YMR179W	8	1	63.71	0.977576	0.989204	1.48664	eap1∆	WT
YDR298C	10	8	332.98	0.978072	0.989204	1.01721	eap1∆	WT
YLR295C	4	3	94.54	0.98029	0.990611	2.88944	eap1∆	WT
YMR131C	9	7	287.8	0.980986	0.990611	1.13849	eap1∆	WT
YOR027W	29	25	1215.08	0.982419	0.990611	1.00151	WT	eap1∆
YGR132C	8	4	146.62	0.98264	0.990611	1.12367	WT	eap1∆
YDR258C	28	21	755.91	0.982751	0.990611	1.0448	eap1∆	WT
YHR012W	2	1	37.98	0.983419	0.990611	1.00288	WT	eap1∆
YDL140C	26	20	698.43	0.983545	0.990611	1.00086	eap1∆	WT
YDR152W	4	3	85.85	0.983861	0.990611	1.0757	eap1∆	WT
YBR247C	8	6	254.66	0.984628	0.990611	1.00192	eap1∆	WT
YER003C	14	12	593.25	0.984946	0.990611	1.00882	eap1∆	WT
YDR346C	8	8	229.27	0.985085	0.990611	1.00428	eap1∆	WT
YKR081C	5	2	149.68	0.985544	0.990611	1.04459	WT	eap1∆
YDR507C	17	4	99.64	0.988004	0.992055	1.54047	WT	eap1∆
YDR345C	8	7	294.01	0.98801	0.992055	1.15981	WT	eap1∆
YAR002C-A	2	2	34.4	0.98873	0.992055	1.0091	eap1∆	WT
YPR112C	7	3	115.78	0.98901	0.992055	1.01859	WT	eap1∆
YPL090C	17	14	895.03	0.989914	0.992452	1.00345	eap1∆	WT
YHL007C	7	1	57.19	0.991818	0.993851	1.07179	WT	eap1∆
YDR294C	9	6	102.25	0.996395	0.997927	1.01352	eap1∆	WT
YOR243C	12	8	359.21	0.997069	0.99809	1.07467	eap1∆	WT
YLR061W	6	3	228.12	0.997741	0.998252	1.00014	eap1∆	WT
YBR006W	8	5	116.16	0.998976	0.998976	1.28703	eap1∆	WT

## Sheet: Dataset5. WT VS ∆∆ proteome
Accession	Peptide.count	Peptides.used.for.quantitation	Confidence.score	Anova..p.	FDR	Max.fold.change	Highest.mean.condition	Lowest.mean.condition
YBR014C	2	2	28.74	5.62e-12	8.46515e-09	263.473	WT	∆∆
YLR074C	1	1	44.2	8.66e-12	8.46515e-09	Inf	WT	∆∆
YDR392W	5	2	77.45	8.46e-10	5.5131e-07	Inf	WT	∆∆
YOL133W	1	1	36.38	1.43e-09	6.98913e-07	Inf	WT	∆∆
YFR009W	17	12	455.58	7.29e-09	2.85039e-06	2.41966	∆∆	WT
YAL005C	50	12	3486.48	2.01e-07	6.54925e-05	1.68237	∆∆	WT
YOL140W	9	8	243.36	2.5e-07	6.98214e-05	4.061	WT	∆∆
YEL021W	30	26	1843.79	5.04e-07	0.000123165	3.09787	∆∆	WT
YJR148W	19	13	869.26	6.03e-07	0.000130985	2.412	WT	∆∆
YDL066W;YLR174W	33	21	1663.38	7.87e-07	0.000153858	1.83639	WT	∆∆
YKL029C	26	20	943.12	9.68e-07	0.00017204	2.3336	WT	∆∆
YLR300W	12	10	380.35	1.2e-06	0.000190988	3.04431	∆∆	WT
YGL009C	62	49	3152.93	1.27e-06	0.000190988	2.15922	WT	∆∆
YMR108W	30	25	1425.77	1.39e-06	0.000194104	1.71587	WT	∆∆
YGR200C	6	6	160.64	1.77e-06	0.00022885	1.63433	∆∆	WT
YBR145W	7	3	177.32	1.93e-06	0.00022885	3.5057	WT	∆∆
YDL097C	12	9	361.5	1.99e-06	0.00022885	1.67296	∆∆	WT
YHR091C	6	2	100.28	2.71e-06	0.000276828	15.2645	WT	∆∆
YFL045C	18	14	745.19	3e-06	0.000276828	1.80082	WT	∆∆
YER175C	9	4	241.76	3.08e-06	0.000276828	3.20165	WT	∆∆
YBL047C	29	21	1064.48	3.25e-06	0.000276828	2.15826	∆∆	WT
YPR145W	32	20	1347.93	3.36e-06	0.000276828	1.93217	WT	∆∆
YHR208W	23	17	1526.6	3.37e-06	0.000276828	2.0189	WT	∆∆
YML123C	5	2	85.28	3.42e-06	0.000276828	26.3969	∆∆	WT
YKL210W	40	30	1624.89	3.54e-06	0.000276828	1.59958	∆∆	WT
YKL126W;YMR104C	6	4	134.37	4.02e-06	0.000295422	2.26	∆∆	WT
YER122C	15	10	241.23	4.08e-06	0.000295422	4.31359	WT	∆∆
YLR303W	15	12	929.53	5.18e-06	0.000360664	1.79127	WT	∆∆
YKL215C	13	7	270.4	5.35e-06	0.000360664	2.71929	∆∆	WT
YEL071W	32	25	1467.26	5.58e-06	0.00036363	2.11361	WT	∆∆
YOR363C	6	1	47.81	6.22e-06	0.000385502	173.448	WT	∆∆
YKL001C	5	2	106.4	6.31e-06	0.000385502	7.25093	WT	∆∆
YJR076C	9	5	150.04	7.34e-06	0.000434839	1.53294	∆∆	WT
YJL088W	15	12	576.14	7.61e-06	0.000437575	2.48728	WT	∆∆
YHR023W	18	4	176.48	9.87e-06	0.00055131	4.9665	∆∆	WT
YOR276W	4	4	91.93	1.08e-05	0.0005865	10.8158	WT	∆∆
YLR438W	17	15	612.44	1.16e-05	0.000612919	1.58619	WT	∆∆
YPL271W	2	2	92.13	1.23e-05	0.000632803	1.59945	WT	∆∆
YKR066C	10	7	281.26	1.41e-05	0.000690767	2.36306	WT	∆∆
YOL058W	25	21	1476.73	1.5e-05	0.000690767	1.95309	WT	∆∆
YOR209C	13	10	449.34	1.5e-05	0.000690767	1.4493	WT	∆∆
YBL099W	29	20	1078.5	1.53e-05	0.000690767	1.99554	WT	∆∆
YDR074W	20	16	673.68	1.53e-05	0.000690767	1.9354	∆∆	WT
YGL173C	33	23	706.65	1.56e-05	0.000690767	1.82195	∆∆	WT
YNL037C	13	12	576.07	1.59e-05	0.000690767	1.74085	WT	∆∆
YNL123W	15	12	331.82	1.66e-05	0.0007055	1.99103	∆∆	WT
YER151C	13	5	244.72	1.76e-05	0.000732085	2.81152	∆∆	WT
YLR129W	10	5	166.61	1.84e-05	0.000749417	7.84823	WT	∆∆
YOL154W	4	3	99.73	1.96e-05	0.000755167	14.4467	WT	∆∆
YOR347C	8	5	308.66	1.97e-05	0.000755167	2.19644	∆∆	WT
YML125C	7	6	341.49	1.97e-05	0.000755167	3.51082	∆∆	WT
YDR117C	6	3	102.22	2.02e-05	0.000759442	26.1986	WT	∆∆
YPL110C	9	4	169.74	2.09e-05	0.000770934	12.0581	∆∆	WT
YKR089C	6	1	28.59	2.36e-05	0.000838873	258.06	WT	∆∆
YKL110C	3	1	49.07	2.36e-05	0.000838873	6.61923	WT	∆∆
YDL215C	24	17	748.48	2.45e-05	0.000855312	1.98817	WT	∆∆
YLL021W	17	9	276.02	2.78e-05	0.000953491	2.54268	∆∆	WT
YMR173W	9	8	292.07	3.27e-05	0.00109016	15.6398	WT	∆∆
YAR071W;YHR215W	8	3	215.63	3.29e-05	0.00109016	20.5208	∆∆	WT
YDR298C	10	8	332.98	3.4e-05	0.00110783	2.36572	WT	∆∆
YBR010W	3	2	81.1	3.46e-05	0.0011089	3.71721	∆∆	WT
YHL004W	2	1	13.39	3.53e-05	0.00111309	151.844	WT	∆∆
YIR034C	15	11	562.07	3.69e-05	0.00114507	2.09525	WT	∆∆
YPL231W	107	84	5678.91	3.82e-05	0.00116689	1.92336	∆∆	WT
YNL002C	8	4	163.03	5.33e-05	0.0016031	1.48901	∆∆	WT
YPR173C	8	3	64.43	5.56e-05	0.00164694	2.69252	WT	∆∆
YML100W	23	19	573.02	5.9e-05	0.001702	1.94742	∆∆	WT
YBL024W	27	22	752.49	5.92e-05	0.001702	1.80883	∆∆	WT
YFR049W	6	5	74.04	6.1e-05	0.00172833	1.92603	∆∆	WT
YDR129C	26	19	1020.98	6.31e-05	0.00176229	1.40906	∆∆	WT
YIR001C	6	4	67.42	6.81e-05	0.00187515	3.26791	WT	∆∆
YLR113W	5	4	150.62	7.13e-05	0.00190026	3.21109	∆∆	WT
YFL007W	22	9	213.57	7.23e-05	0.00190026	3.07526	WT	∆∆
YFR051C	6	4	63.94	7.28e-05	0.00190026	5.26516	WT	∆∆
YJR109C	60	47	3097.2	7.29e-05	0.00190026	1.76743	∆∆	WT
YOR298C-A	6	4	279.64	7.59e-05	0.00195243	2.27096	∆∆	WT
YHL030W	17	7	326.06	7.86e-05	0.00199562	6.59855	∆∆	WT
YDR001C	13	7	276.82	8.35e-05	0.00209285	2.11109	∆∆	WT
YLR089C	15	12	382.39	8.8e-05	0.00215294	1.87265	WT	∆∆
YKR078W	7	2	55.51	8.81e-05	0.00215294	9.63199	WT	∆∆
YDR153C	4	2	116.18	9.07e-05	0.00218912	6.70631	WT	∆∆
YDR063W	1	1	45.76	9.28e-05	0.00221249	1.63354	∆∆	WT
YER086W	27	22	724.89	9.98e-05	0.00235071	1.81076	WT	∆∆
YML128C	6	5	116.03	0.000103024	0.00239776	10.4686	WT	∆∆
YMR304W	8	4	108	0.000107355	0.00246917	2.3673	∆∆	WT
YLR270W	13	9	402.04	0.000109159	0.00248146	1.50881	∆∆	WT
YER073W	27	19	1034.68	0.00011139	0.00250307	1.70783	WT	∆∆
YJL153C	16	11	785.93	0.000122586	0.00272336	1.88419	WT	∆∆
YER069W	35	27	1284.68	0.000124228	0.00272883	1.51159	WT	∆∆
YLR134W	16	8	616.93	0.000126689	0.00273081	7.58053	WT	∆∆
YMR096W	15	6	651.09	0.000127112	0.00273081	2.27516	WT	∆∆
YKL010C	11	7	242.67	0.000135947	0.00288887	5.44369	∆∆	WT
YOR220W	5	3	151.16	0.000138213	0.00290544	1.80324	∆∆	WT
YOR253W	2	2	137.78	0.000150683	0.00313389	3.48237	∆∆	WT
YPR110C	9	8	340.71	0.000154474	0.00317891	2.68419	WT	∆∆
YGR271W	9	2	61.4	0.000160344	0.00326534	1.53528	WT	∆∆
YGR234W	19	15	1027.26	0.000164882	0.00332314	1.44551	WT	∆∆
YBR088C	11	9	477.99	0.000168799	0.00334062	1.57273	∆∆	WT
YCL040W	20	13	698.88	0.000169167	0.00334062	1.50443	∆∆	WT
YER012W	6	4	235.91	0.000172569	0.00337372	1.52686	∆∆	WT
YAL049C	5	3	103.6	0.000175656	0.00340007	1.83892	∆∆	WT
YNR007C	3	1	56.01	0.000182889	0.00348499	70.193	WT	∆∆
YLR406C	10	1	526.79	0.000183608	0.00348499	33.8053	WT	∆∆
YGL206C	53	44	2237.19	0.000196233	0.00368844	1.52528	∆∆	WT
YMR217W	27	20	1149.79	0.000199723	0.00368844	1.29957	WT	∆∆
YJL010C	7	4	130.85	0.00020006	0.00368844	4.6581	WT	∆∆
YGR088W	10	9	189.58	0.0002041	0.00368844	2.40594	WT	∆∆
YDR158W	23	23	1175.44	0.000204718	0.00368844	1.45453	WT	∆∆
YML105C	3	2	70.29	0.000205647	0.00368844	5.55075	∆∆	WT
YKL113C	4	2	40.25	0.000207691	0.00369124	2.04322	∆∆	WT
YER090W	16	13	772.44	0.000210899	0.00371448	1.30538	WT	∆∆
YHR027C	26	22	1087.37	0.00021647	0.00377856	1.521	∆∆	WT
YJR088C	6	3	255.49	0.000222009	0.00384095	4.04011	∆∆	WT
YJR132W	5	4	155.14	0.000230636	0.003934	2.24662	∆∆	WT
YER052C	16	12	638.91	0.00023592	0.003934	1.72574	WT	∆∆
YCL037C	9	8	405.13	0.000236213	0.003934	1.73374	∆∆	WT
YDR304C	7	6	171.52	0.000237945	0.003934	1.35052	∆∆	WT
YOR230W	17	15	825.87	0.000239616	0.003934	1.48074	WT	∆∆
YER081W	18	6	820.12	0.000239976	0.003934	2.67922	WT	∆∆
YPL212C	16	10	223.35	0.000241473	0.003934	1.54813	WT	∆∆
YKL054C	17	16	333.64	0.000245184	0.00396144	1.59868	∆∆	WT
YER155C	15	5	156.07	0.00025903	0.00415085	3.01528	WT	∆∆
YMR095C	5	4	101.11	0.000272761	0.00433535	5.74619	WT	∆∆
YDL064W	3	1	23.57	0.000279402	0.00434175	1.85406	∆∆	WT
YGL224C	3	2	35.55	0.000281093	0.00434175	51.0648	WT	∆∆
YLL024C	54	12	3788.76	0.00028191	0.00434175	1.511	∆∆	WT
YDL171C	53	39	1797.4	0.000282047	0.00434175	1.58109	WT	∆∆
YPL063W	11	7	183.17	0.000286153	0.00435871	2.27754	∆∆	WT
YJR016C	42	36	2242.49	0.000287608	0.00435871	1.57542	WT	∆∆
YBR092C	10	2	184.41	0.000299256	0.00450035	1.88209	∆∆	WT
YPR033C	24	18	1132.43	0.000303297	0.0045263	1.2957	WT	∆∆
YDR353W;YHR106W	18	15	1156.05	0.00031297	0.00463528	1.25042	∆∆	WT
YHL034C	10	7	330.83	0.000319995	0.00469216	1.4538	∆∆	WT
YPR035W	21	15	754.26	0.000322948	0.00469216	1.59104	WT	∆∆
YIL002C	4	1	43.33	0.000325722	0.00469216	2019.33	∆∆	WT
YOR320C	4	2	46.08	0.000328547	0.00469216	2.09837	∆∆	WT
YOL139C	11	7	565.2	0.000328811	0.00469216	1.38617	WT	∆∆
YMR129W	6	3	45.88	0.000333477	0.00472426	2.66786	WT	∆∆
YOR020C	7	3	378.22	0.000338607	0.00476242	1.49772	∆∆	WT
YOR303W	9	5	284.2	0.000348109	0.00486109	2.09365	WT	∆∆
YHR121W	4	4	215.27	0.000351567	0.0048691	2.56512	∆∆	WT
YDL117W	4	1	40.89	0.000353868	0.0048691	76.6526	WT	∆∆
YOL059W	13	10	542.76	0.000357073	0.0048691	1.43348	WT	∆∆
YCL035C	6	6	347.22	0.000362694	0.0048691	1.25859	∆∆	WT
YOR374W	26	19	1219.35	0.000362944	0.0048691	1.89633	∆∆	WT
YFR033C	1	1	34.06	0.000363626	0.0048691	62.4686	WT	∆∆
YOR197W	6	6	208.37	0.000366679	0.00487658	1.88858	∆∆	WT
YOR184W	20	19	1212.9	0.000371218	0.00490359	1.51546	WT	∆∆
YCL034W	3	3	69.93	0.000375531	0.00492727	3.02355	WT	∆∆
YOR128C	25	18	959.66	0.000378073	0.00492755	1.62921	∆∆	WT
YDR127W	68	53	2630.57	0.000393806	0.00509861	1.33372	∆∆	WT
YJR121W	24	23	1438.21	0.000397542	0.00511065	2.01912	WT	∆∆
YDL055C	19	16	1304.76	0.000399964	0.00511065	1.53191	∆∆	WT
YDR211W	11	9	251.43	0.000405073	0.00514232	1.82411	∆∆	WT
YBR263W	18	12	646.48	0.000410232	0.00517422	1.40907	WT	∆∆
YBR189W	15	1	772.63	0.000422131	0.00529017	2.813	WT	∆∆
YNL134C	16	14	1036.24	0.000430485	0.0053605	1.74736	∆∆	WT
YLR419W	15	7	95.14	0.000438622	0.00542725	2.33713	WT	∆∆
YNR033W	7	1	44.38	0.000455101	0.00559574	31.2526	∆∆	WT
YNL112W	17	13	706.61	0.000466544	0.00570058	1.38889	WT	∆∆
YOL143C	9	8	255.45	0.000488857	0.00593612	1.93962	WT	∆∆
YHR046C	3	2	40.34	0.000502332	0.00606209	3.18137	WT	∆∆
YPR016C	6	5	288.78	0.000532126	0.00638225	1.56725	∆∆	WT
YPL228W	5	2	31.35	0.000559864	0.0066616	1.93909	∆∆	WT
YBR039W	7	7	275.18	0.000562232	0.0066616	2.18426	WT	∆∆
YMR109W	20	11	414.1	0.000568647	0.00669702	1.48756	∆∆	WT
YMR138W	1	1	15.25	0.000579714	0.00678647	1.88891	∆∆	WT
YHR111W	4	1	41.97	0.000598159	0.00692186	31.0458	WT	∆∆
YGL195W	52	37	1750.18	0.00059836	0.00692186	1.7214	∆∆	WT
YIL053W	22	13	1351.84	0.000608924	0.00698269	1.51118	WT	∆∆
YEL019C	2	2	20.15	0.000610762	0.00698269	3.9872	∆∆	WT
YEL058W	13	10	546.01	0.000619523	0.00704167	1.56847	∆∆	WT
YDR086C	1	1	31.43	0.000632043	0.00714245	Inf	∆∆	WT
YCL064C	15	9	431.98	0.000637532	0.00715885	3.25518	∆∆	WT
YML010W	20	15	535.76	0.000640818	0.00715885	1.66703	∆∆	WT
YNL088W	15	3	112.17	0.000653516	0.00725169	17.9674	WT	∆∆
YBR093C	7	2	133.74	0.000656547	0.00725169	2.57793	∆∆	WT
YMR272C	5	3	53.46	0.000663134	0.0072833	2.74844	∆∆	WT
YOL021C	10	8	269.97	0.000675598	0.00737874	1.80676	∆∆	WT
YIL137C	11	7	287.22	0.000683999	0.00742899	2.67063	∆∆	WT
YGR147C	2	2	16.2	0.000696672	0.00752483	2.48635	∆∆	WT
YMR178W	7	4	212.58	0.000703481	0.00755662	1.60308	∆∆	WT
YFR030W	26	20	826.64	0.000747116	0.00798148	1.58856	WT	∆∆
YBR049C	13	5	184.01	0.000756529	0.00803812	3.34878	WT	∆∆
YIR004W	5	1	84.04	0.000763871	0.0080576	2.56194	∆∆	WT
YLL026W	39	32	1643.11	0.000766605	0.0080576	2.43565	∆∆	WT
YKL204W	5	3	99.75	0.000793301	0.0082936	51.3183	WT	∆∆
YLR410W	22	14	469.83	0.000808986	0.00841259	1.93072	∆∆	WT
YJR070C	21	16	832.06	0.000821732	0.00849993	1.37227	WT	∆∆
YFR024C-A	4	1	122.17	0.000835128	0.00859303	22.8651	WT	∆∆
YJL076W	10	4	212.89	0.000843033	0.00862895	6.39711	WT	∆∆
YDR233C	9	7	333.89	0.000872191	0.0088809	3.53034	WT	∆∆
YHR138C	2	1	40.24	0.000886662	0.00898147	7.60758	∆∆	WT
YLR388W	5	2	280.9	0.000892308	0.00899207	3.99855	WT	∆∆
YIL083C	9	9	291.8	0.000919755	0.0091714	1.77393	WT	∆∆
YMR083W	13	7	436.56	0.000921659	0.0091714	1.33175	WT	∆∆
YNL135C	9	7	482.23	0.000924177	0.0091714	1.32061	∆∆	WT
YOR187W	16	14	569.8	0.000931106	0.0091935	1.37206	∆∆	WT
YPR060C	8	6	183.23	0.000951739	0.0093277	2.22074	WT	∆∆
YGL048C	15	9	452.87	0.000966919	0.0093277	1.7243	∆∆	WT
YLR035C	6	3	28.8	0.000967957	0.0093277	1.64868	∆∆	WT
YDR171W	3	3	50.5	0.000969332	0.0093277	1.76729	∆∆	WT
YDR032C	5	4	297.63	0.000971819	0.0093277	1.5658	∆∆	WT
YMR222C	1	1	29.74	0.000973325	0.0093277	49.873	WT	∆∆
YKR002W	5	1	43.63	0.000981741	0.00936246	2.11429	∆∆	WT
YPR019W	4	2	77.53	0.00103037	0.00975204	8.95271	∆∆	WT
YKR057W	8	1	513.38	0.0010328	0.00975204	1.65829	∆∆	WT
YMR146C	14	13	728.16	0.0010388	0.00975204	1.40212	∆∆	WT
YCR035C	3	2	45.13	0.00104584	0.00975204	41.6227	∆∆	WT
YKL028W	8	4	91.2	0.00105125	0.00975204	4.52048	WT	∆∆
YFL037W	13	12	514.41	0.00105252	0.00975204	1.34566	∆∆	WT
YGR254W	41	16	2400.2	0.00106164	0.00978642	1.51726	∆∆	WT
YLR167W;YIL148W	12	8	627.68	0.00106624	0.00978642	1.38653	∆∆	WT
YDR226W	24	16	1139.74	0.00109417	0.00995602	1.55336	WT	∆∆
YOR158W	2	1	29.81	0.00109491	0.00995602	30.8452	WT	∆∆
YBR208C	22	13	384.3	0.00110412	0.00999327	1.59157	WT	∆∆
YNL160W	5	5	217.64	0.00112454	0.0101312	1.97238	∆∆	WT
YGL012W	5	3	73.88	0.001143	0.0102503	2.89069	∆∆	WT
YAL062W	12	2	454.72	0.00115208	0.0102846	6.43886	WT	∆∆
YML085C	10	7	453.59	0.00118966	0.0105717	1.27973	∆∆	WT
YFR053C	22	17	1107.57	0.00120532	0.0106625	1.58558	∆∆	WT
YDL126C	46	40	2088.88	0.00121773	0.0107237	1.3354	∆∆	WT
YJL068C	6	5	224.74	0.0012266	0.0107283	1.82732	∆∆	WT
YKL182W	105	93	5258.32	0.00122923	0.0107283	1.54366	∆∆	WT
YDL131W	24	5	1371.84	0.00128466	0.0111623	1.934	WT	∆∆
YOR109W	9	5	249.25	0.00129473	0.0111999	3.34556	∆∆	WT
YCR028C-A	5	2	248.07	0.00130564	0.0112446	7.23725	WT	∆∆
YBR053C	9	7	228.13	0.00131171	0.0112473	1.518	∆∆	WT
YMR260C	7	4	313.82	0.00133621	0.0113621	2.70905	WT	∆∆
YKL206C	2	2	41.32	0.00133672	0.0113621	2.16191	∆∆	WT
YGR240C	59	47	3527.64	0.00134399	0.0113638	1.24456	∆∆	WT
YDR019C	12	12	397.51	0.00134855	0.0113638	1.38313	WT	∆∆
YDR054C	3	2	82.37	0.00138711	0.0116386	1.80239	WT	∆∆
YAL021C	7	2	53.93	0.00141591	0.0118295	2.23317	∆∆	WT
YPL249C-A	10	2	496.15	0.00144396	0.0120126	10.2459	WT	∆∆
YDR388W	11	8	284.53	0.00146093	0.0121022	2.41024	∆∆	WT
YMR247C	12	7	204.91	0.00147574	0.0121733	1.74195	∆∆	WT
YLR429W	18	14	552.34	0.00150312	0.012347	2.68926	WT	∆∆
YER127W	5	2	31.6	0.00151869	0.0124061	12.2895	WT	∆∆
YCR060W	1	1	14.31	0.00152794	0.0124061	40.27	∆∆	WT
YGR218W	18	11	444.1	0.00152935	0.0124061	1.65234	∆∆	WT
YDL130W	2	2	171.16	0.00156389	0.0125938	1.63338	∆∆	WT
YLL050C	11	11	651.29	0.00156735	0.0125938	1.27306	∆∆	WT
YMR062C	24	18	1097.34	0.00157181	0.0125938	1.88436	WT	∆∆
YNL148C	6	1	50.89	0.00157916	0.0126011	1.70719	∆∆	WT
YLR355C	33	28	2073.3	0.00160127	0.0127255	1.42887	WT	∆∆
YJR064W	18	14	616.62	0.00163873	0.0129255	1.23836	∆∆	WT
YOR361C	29	24	979.67	0.00164087	0.0129255	1.38514	∆∆	WT
YJR144W	7	6	177.28	0.00164626	0.0129255	3.07661	WT	∆∆
YCR075W-A	2	1	25.24	0.00165529	0.0129317	4.60329	WT	∆∆
YAL016W	12	8	247.76	0.001666	0.0129317	1.54105	∆∆	WT
YJL180C	4	4	27.14	0.00166689	0.0129317	4.07518	WT	∆∆
YPR135W	11	3	133.11	0.00171586	0.0132589	2.79846	∆∆	WT
YMR318C	17	16	835.67	0.00183296	0.0140648	1.34158	∆∆	WT
YNL111C	2	1	43.1	0.00184062	0.0140648	5.2266	∆∆	WT
YJR025C	10	7	287.37	0.00185262	0.0140648	1.76007	WT	∆∆
YJR104C	12	9	605.26	0.00185535	0.0140648	1.3434	∆∆	WT
YGL190C	6	3	62.12	0.00185612	0.0140648	2.38907	WT	∆∆
YJL217W	9	6	320.52	0.0018735	0.0140853	1.62796	WT	∆∆
YGR001C	4	3	130.08	0.00187859	0.0140853	1.41132	WT	∆∆
YBL030C	16	10	712.49	0.00188044	0.0140853	2.36381	WT	∆∆
YAL046C	2	2	48.99	0.00196255	0.0146442	4.49978	WT	∆∆
YKL213C	8	4	101.02	0.00198293	0.01474	3.46907	WT	∆∆
YJL026W	18	12	594.36	0.00204184	0.0151204	1.39607	WT	∆∆
YGL120C	12	10	176.04	0.0020663	0.0152438	1.39035	∆∆	WT
YLR432W	24	7	1557.45	0.00213064	0.0156594	1.46323	∆∆	WT
YLR244C	10	9	325.18	0.00219396	0.0160644	1.40052	WT	∆∆
YHR018C	19	14	888.07	0.00221463	0.0161298	1.60032	WT	∆∆
YPL004C	15	9	1006.39	0.00222176	0.0161298	1.18661	WT	∆∆
YOR123C	4	3	129.94	0.00222765	0.0161298	3.37938	∆∆	WT
YBR046C	8	6	222.56	0.00224966	0.0162291	1.92286	WT	∆∆
YJR139C	19	17	1004.77	0.00226853	0.0163051	1.31345	WT	∆∆
YJL045W	3	1	51.21	0.00230138	0.0164806	8.09804	WT	∆∆
YJL060W	12	11	400.59	0.00233073	0.0166233	1.29168	WT	∆∆
YMR295C	3	3	60.48	0.00233831	0.0166233	2.05566	WT	∆∆
YNL287W	20	18	789.04	0.00236835	0.0167758	1.26893	∆∆	WT
YHR216W	15	2	899.2	0.0024077	0.0169354	1.95741	WT	∆∆
YGR083C	10	5	109.52	0.0024082	0.0169354	2.1208	WT	∆∆
YGL037C	6	5	178.37	0.00241891	0.0169497	1.50877	∆∆	WT
YPR108W	11	9	340.83	0.00252632	0.0175761	1.44562	∆∆	WT
YNL255C	6	5	284.97	0.00252947	0.0175761	3.97148	WT	∆∆
YDL095W	9	5	103.04	0.00253528	0.0175761	4.16198	WT	∆∆
YGR111W	4	4	91.46	0.00255653	0.0176608	1.68499	∆∆	WT
YNL061W	12	9	446.48	0.00259543	0.0178252	2.10981	WT	∆∆
YGR085C	10	7	440.94	0.00260418	0.0178252	1.49745	∆∆	WT
YPL273W;YMR321C	12	8	431.17	0.00262163	0.0178252	1.77522	WT	∆∆
YDL040C	26	20	754.08	0.00265349	0.0178252	1.30141	∆∆	WT
YPL019C	8	3	44.92	0.00265588	0.0178252	8.54608	WT	∆∆
YER168C	6	4	70.06	0.00267155	0.0178252	1.43009	∆∆	WT
YOR157C	5	4	139.71	0.00267433	0.0178252	1.80155	∆∆	WT
YHR164C	14	2	64.86	0.00267675	0.0178252	9.82112	∆∆	WT
YPL093W	14	6	337.32	0.00267976	0.0178252	1.84408	∆∆	WT
YNL247W	33	21	909.48	0.00268384	0.0178252	1.22739	∆∆	WT
YJL200C	17	12	510.84	0.00268752	0.0178252	1.27139	WT	∆∆
YNL168C	5	1	80.8	0.00268973	0.0178252	1.3537	∆∆	WT
YIL133C	19	7	654.57	0.00270543	0.0178687	1.93287	WT	∆∆
YOL064C	10	8	388.8	0.00272047	0.0178898	2.01921	WT	∆∆
YJL164C	2	1	57.51	0.00273537	0.0178898	7.70516	WT	∆∆
YPL010W	5	3	134.4	0.00273609	0.0178898	1.79875	∆∆	WT
YGR130C	23	13	553.41	0.0027679	0.0180375	1.6312	∆∆	WT
YBR084W	22	14	552.52	0.002795	0.0181536	3.05761	WT	∆∆
YHR143W-A	2	1	119.51	0.0028112	0.0181875	1.54724	∆∆	WT
YGR280C	3	3	44.03	0.00283181	0.0181875	8.81293	∆∆	WT
YML079W	4	3	130.95	0.00283349	0.0181875	2.20197	WT	∆∆
YFR052W	9	8	307.21	0.00283743	0.0181875	1.70216	∆∆	WT
YER133W	8	7	316.38	0.00286578	0.0183091	1.56525	WT	∆∆
YGL020C	1	1	65.52	0.00287789	0.0183266	Inf	WT	∆∆
YNL209W	40	1	2959.32	0.00291292	0.0184895	1.48522	∆∆	WT
YOR145C	9	2	68.6	0.00292686	0.0185178	3.78749	WT	∆∆
YNL079C	18	15	958.78	0.00294376	0.0185647	1.47839	WT	∆∆
YMR092C	15	11	401.91	0.00304149	0.0190421	1.3982	∆∆	WT
YNL055C	16	12	793.81	0.00304369	0.0190421	1.86755	WT	∆∆
YCR004C	8	5	267.97	0.00304868	0.0190421	1.45026	∆∆	WT
YOL030W	4	4	150.1	0.00306147	0.0190474	8.48973	WT	∆∆
YLR371W	14	2	61.97	0.00306902	0.0190474	2.10052	∆∆	WT
YLR025W	5	3	99.76	0.00311405	0.0192657	3.02063	WT	∆∆
YBL039C	24	19	952.7	0.00314437	0.019392	1.67169	∆∆	WT
YCR053W	34	27	1599.33	0.00320567	0.0197078	1.55767	WT	∆∆
YGR032W	21	2	749.58	0.00322419	0.0197595	4.52098	WT	∆∆
YIL075C	24	15	701.77	0.00328631	0.0200773	1.41092	∆∆	WT
YOL060C	2	2	26.72	0.00334783	0.0203894	12.9324	WT	∆∆
YKL150W	10	8	256.52	0.00336621	0.0204377	1.45358	WT	∆∆
YKR084C	10	8	106.66	0.00339277	0.0205174	1.61796	WT	∆∆
YGR167W	11	8	397.97	0.00340033	0.0205174	1.7042	∆∆	WT
YDR087C	6	3	55.33	0.00342409	0.0205972	2.05976	WT	∆∆
YDL080C	5	2	179.66	0.00355082	0.021294	9.94621	WT	∆∆
YOR014W	1	1	21.15	0.0035978	0.0215098	24.4848	WT	∆∆
YGR116W	30	17	631.45	0.00362248	0.0215913	1.56173	∆∆	WT
YER006W	11	8	433.85	0.00373497	0.0221941	1.43302	WT	∆∆
YKL121W	4	2	24.56	0.00377922	0.022389	2.30023	WT	∆∆
YGR009C	6	2	105.56	0.00385108	0.0227164	1.48403	WT	∆∆
YPL081W	15	1	774.91	0.00385772	0.0227164	20.2203	WT	∆∆
YGR279C	8	4	352.55	0.00390252	0.0229112	1.98217	WT	∆∆
YDL173W	2	2	61.21	0.00393067	0.0230074	4.28339	WT	∆∆
YKL096W	5	4	330.65	0.00398958	0.0232825	3.36503	∆∆	WT
YNL131W	5	4	218.87	0.00407233	0.0236947	1.53988	WT	∆∆
YKL216W	8	5	337.87	0.0040926	0.0237419	1.71582	WT	∆∆
YDR487C	9	9	394.27	0.00417475	0.0241468	1.41699	WT	∆∆
YAL035W	36	19	1151.08	0.00435972	0.0251424	1.35734	∆∆	WT
YHR001W	7	3	67.63	0.00441331	0.0253766	1.61367	WT	∆∆
YMR315W	13	9	540.6	0.00443502	0.0254266	1.29343	∆∆	WT
YML070W	20	17	845.31	0.00451251	0.025723	1.26099	∆∆	WT
YIL121W	3	2	91.75	0.00452754	0.025723	22.7802	∆∆	WT
YOR195W	11	4	98	0.00452757	0.025723	2.57946	∆∆	WT
YKL014C	19	6	191.44	0.00454034	0.025723	54.2442	∆∆	WT
YDL022W	9	7	667.35	0.00455251	0.025723	1.49335	∆∆	WT
YOR164C	6	3	135.5	0.00458962	0.0257995	5.3576	WT	∆∆
YLR351C	12	10	417.37	0.00459244	0.0257995	1.71248	WT	∆∆
YBL102W	3	1	131.7	0.00461352	0.0258436	1.77402	∆∆	WT
YIL138C	13	10	379.78	0.00464458	0.0258987	1.94341	WT	∆∆
YPR074C	32	26	1355.08	0.00466267	0.0258987	1.21506	WT	∆∆
YOL109W	12	8	517.44	0.00466309	0.0258987	1.8031	WT	∆∆
YHR170W	14	10	469.02	0.0047058	0.0260619	1.4327	WT	∆∆
YIL109C	15	11	422.14	0.00473206	0.0261185	1.22511	∆∆	WT
YGR061C	58	50	2725.29	0.00474274	0.0261185	1.44673	∆∆	WT
YHL033C	25	5	1426.61	0.00480163	0.026266	1.63169	∆∆	WT
YIL110W	6	3	50.68	0.00480629	0.026266	6.8724	WT	∆∆
YGL157W	15	10	388.4	0.00480984	0.026266	1.4	∆∆	WT
YLR075W	19	15	899.67	0.00485519	0.0264212	1.48798	∆∆	WT
YJR117W	8	7	249.22	0.00486995	0.0264212	3.38806	∆∆	WT
YER024W	5	3	75.94	0.0048854	0.0264212	2.81184	WT	∆∆
YOR283W	6	4	109.52	0.00489231	0.0264212	3.71402	WT	∆∆
YNL212W	10	3	59.28	0.00491449	0.0264678	4.6147	WT	∆∆
YFR044C	15	10	605.81	0.00501352	0.026927	1.52426	∆∆	WT
YOL040C	8	6	598.96	0.00509531	0.0272913	1.41672	WT	∆∆
YNL096C	18	7	648.36	0.00521933	0.0278792	1.27753	∆∆	WT
YNL052W	3	2	66.83	0.00531908	0.0282612	6.05399	WT	∆∆
YBR200W	3	1	51.49	0.00531976	0.0282612	Inf	WT	∆∆
YDL029W	14	10	391.94	0.00569402	0.0301675	1.36864	∆∆	WT
YIR003W	3	2	51.27	0.00571494	0.0301965	5.4086	WT	∆∆
YBL076C	56	42	2140.42	0.00576092	0.0303574	1.32068	∆∆	WT
YGR136W	2	2	90.99	0.00580124	0.0304036	1.6785	∆∆	WT
YDL128W	1	1	69.88	0.00580798	0.0304036	17.7809	∆∆	WT
YML117W	9	1	66.64	0.00581633	0.0304036	4.1639	∆∆	WT
YPR113W	6	3	77.06	0.0058926	0.0307201	3.80439	WT	∆∆
YLR328W	3	2	103.23	0.00591998	0.0307807	2.56638	∆∆	WT
YPR191W	17	9	625.94	0.00597895	0.0310049	1.41868	WT	∆∆
YPL031C	6	2	102.94	0.00604925	0.0312865	9.1351	∆∆	WT
YBL087C	13	9	593.67	0.00608284	0.0313772	1.51603	∆∆	WT
YNL206C	4	2	26.37	0.00613703	0.0315734	5.83407	WT	∆∆
YPR169W	5	2	48.12	0.00615528	0.0315842	2.37198	WT	∆∆
YDL051W	8	5	316.51	0.00640245	0.0327315	1.29171	WT	∆∆
YPL211W	2	1	23.95	0.00641236	0.0327315	3.54248	WT	∆∆
YDR377W	2	2	27.76	0.00647423	0.0327984	7.46881	WT	∆∆
YLR460C	5	2	108.31	0.0064841	0.0327984	3.99006	∆∆	WT
YOL022C	7	3	76.17	0.00649058	0.0327984	1.98807	WT	∆∆
YJL159W;YJL160C	5	2	176.5	0.00650405	0.0327984	4.73445	WT	∆∆
YDR481C	10	6	200.61	0.00650934	0.0327984	2.01907	∆∆	WT
YDR044W	5	2	53.67	0.00654867	0.0329117	1.45528	WT	∆∆
YGL201C	8	3	187.2	0.00669996	0.0335857	3.5575	∆∆	WT
YDL143W	18	12	431.6	0.00674398	0.0336491	1.56944	∆∆	WT
YMR309C	17	11	777.28	0.00674703	0.0336491	1.45364	∆∆	WT
YBL015W	4	3	82.22	0.00676495	0.0336526	2.06791	∆∆	WT
YBL002W	8	5	293.57	0.00680883	0.0337849	1.46862	WT	∆∆
YGR233C	11	3	109.66	0.00690754	0.0341216	26.5923	∆∆	WT
YBR094W	4	1	51.43	0.00692715	0.0341216	1.49683	∆∆	WT
YPL226W	36	31	1048.86	0.00692904	0.0341216	1.19857	∆∆	WT
YHR088W	3	2	48.15	0.00694956	0.0341366	2.46209	WT	∆∆
YGR267C	9	8	321.22	0.00716341	0.0350695	1.58865	WT	∆∆
YDL182W	22	4	1174.95	0.00717536	0.0350695	1.71424	WT	∆∆
YPL117C	11	10	336.07	0.00729277	0.0354196	1.77653	WT	∆∆
YPL215W	8	4	78.94	0.00729743	0.0354196	3.56085	WT	∆∆
YHR020W	34	25	1495.17	0.00730133	0.0354196	1.19957	WT	∆∆
YDR207C	4	2	28.98	0.00733845	0.0355116	8.01445	WT	∆∆
YDR448W	1	1	15.47	0.00745338	0.0359787	7.75664	WT	∆∆
YPL111W	11	7	231.04	0.0075336	0.0361964	1.446	WT	∆∆
YOR356W	6	3	186.03	0.0075571	0.0361964	2.97842	WT	∆∆
YBR172C	6	2	110.26	0.00757197	0.0361964	3.05087	∆∆	WT
YBR288C	4	2	97.18	0.00757254	0.0361964	3.12419	∆∆	WT
YMR235C	14	12	542.92	0.00772709	0.036845	1.44406	∆∆	WT
YLR359W	27	19	1018.7	0.00782412	0.0372169	1.42318	∆∆	WT
YDR037W	30	26	1499.85	0.0079168	0.0375664	1.1736	WT	∆∆
YGR266W	8	6	113.33	0.00796959	0.0377253	2.99293	WT	∆∆
YBL101C	10	6	91.02	0.00801047	0.0377738	1.6585	WT	∆∆
YPL061W	37	32	2272.85	0.00802407	0.0377738	1.35873	∆∆	WT
YNL308C	12	6	191.77	0.0080378	0.0377738	1.59738	WT	∆∆
YPR181C	19	17	815.7	0.00812782	0.0381053	1.49911	WT	∆∆
YDL226C	16	11	370.63	0.00816147	0.0381715	1.69421	WT	∆∆
YFL010C	5	3	98.31	0.00818989	0.038213	5.38304	WT	∆∆
YGR173W	6	6	218.15	0.00826742	0.0384829	1.44299	∆∆	WT
YOR202W	4	3	58.2	0.00838574	0.0389409	2.78497	∆∆	WT
YKR016W	10	7	374.02	0.00848917	0.0393278	4.34018	∆∆	WT
YGR204W	44	33	1930.23	0.00852469	0.0393497	1.17169	∆∆	WT
YIL052C	5	2	199.98	0.00853415	0.0393497	1.90412	∆∆	WT
YEL022W	11	4	132.66	0.00866895	0.0398742	1.94288	∆∆	WT
YDR172W	18	13	485.28	0.00869948	0.0398742	1.27871	∆∆	WT
YOR056C	3	2	100.74	0.00871065	0.0398742	12.52	WT	∆∆
YOR259C	8	7	288.11	0.00874236	0.0398742	1.33901	∆∆	WT
YMR305C	5	4	225.54	0.00877246	0.0398742	1.85847	∆∆	WT
YER120W	8	6	340.99	0.00878472	0.0398742	1.51096	WT	∆∆
YOR086C	19	9	520	0.00880934	0.0398742	2.51334	∆∆	WT
YOL056W	5	2	66.88	0.00881221	0.0398742	4.28706	WT	∆∆
YIL091C	5	2	65.23	0.00883148	0.0398742	3.72369	WT	∆∆
YDR092W	3	2	59.9	0.00889157	0.0399594	3.03101	WT	∆∆
YOL041C	14	7	205.03	0.00890282	0.0399594	1.80934	WT	∆∆
YLR106C	54	28	1024.91	0.00891166	0.0399594	2.75183	∆∆	WT
YCL009C	11	11	465.48	0.00893431	0.0399693	1.25172	WT	∆∆
YKR006C	2	2	52.4	0.00900118	0.0401765	2.14371	WT	∆∆
YHR200W	7	7	349.14	0.00902205	0.0401779	1.52025	∆∆	WT
YGL070C	3	2	79	0.00938081	0.0416806	1.88688	∆∆	WT
YEL051W	9	7	177.55	0.00949822	0.0421066	1.5175	∆∆	WT
YNL189W	12	10	315.33	0.00954587	0.0422221	1.92255	∆∆	WT
YGL026C	33	27	1766.05	0.00960689	0.0423961	1.17275	WT	∆∆
YDL058W	31	9	322.94	0.00972127	0.0428042	3.12933	WT	∆∆
YLR401C	10	6	289.6	0.010078	0.0442753	1.69023	WT	∆∆
YLL022C	4	2	35	0.0101037	0.0442887	1.67314	∆∆	WT
YLR186W	6	5	217.83	0.010274	0.0449342	1.5744	∆∆	WT
YPL079W	10	1	416.46	0.0103633	0.0452239	112.906	∆∆	WT
YDR051C	3	3	93.27	0.0104299	0.045413	1.88529	WT	∆∆
YDR432W	9	5	372.69	0.0104822	0.0454893	1.90671	∆∆	WT
YPL023C	7	2	107.02	0.0104939	0.0454893	2.55132	∆∆	WT
YAR007C	9	8	189.93	0.0105745	0.0457372	2.06899	∆∆	WT
YDL137W	14	2	753.15	0.0107148	0.0461489	1.8874	∆∆	WT
YPR147C	3	2	30.96	0.0107169	0.0461489	2.49686	WT	∆∆
YER026C	2	2	107.48	0.0107607	0.0462357	12.9108	∆∆	WT
YMR008C	2	1	45.94	0.0107846	0.0462365	129.746	WT	∆∆
YER062C	16	4	563.3	0.0108228	0.046299	1.50133	∆∆	WT
YGL147C	13	1	734.28	0.0109217	0.0466198	1.34458	∆∆	WT
YGL082W	3	2	55.29	0.0109761	0.04675	3.84995	WT	∆∆
YAR042W	14	6	112.86	0.0111193	0.0472569	2.52454	∆∆	WT
YBR127C	31	23	1813.62	0.0111877	0.0474446	1.21444	∆∆	WT
YCR088W	23	18	751.5	0.0112832	0.0477461	1.2719	∆∆	WT
YGL040C	7	6	224.64	0.0113633	0.047981	1.87367	WT	∆∆
YNR050C	22	19	907.34	0.0115567	0.0486925	1.28594	WT	∆∆
YJL109C	17	12	391.9	0.0116534	0.0489356	3.30151	∆∆	WT
YDL047W	7	5	104.34	0.0116644	0.0489356	1.82059	∆∆	WT
YBR252W	6	3	127.32	0.0117192	0.04906	1.50056	WT	∆∆
YPL129W	4	4	157.83	0.0117652	0.0491473	1.6899	WT	∆∆
YPR080W	34	22	1762.15	0.0120636	0.0502864	1.29952	∆∆	WT
YOR234C	8	2	415.14	0.0121757	0.0506014	1.45345	∆∆	WT
YIR012W	3	1	55.63	0.0121909	0.0506014	1.47078	WT	∆∆
YGL099W	15	8	204.01	0.0122516	0.0506867	1.3496	∆∆	WT
YOR257W	3	2	61.35	0.0122762	0.0506867	4.15962	WT	∆∆
YDR515W	5	1	64.88	0.0122893	0.0506867	10.0494	WT	∆∆
YIL125W	17	14	409.78	0.0124645	0.0513011	1.29589	∆∆	WT
YIL036W	5	2	44.81	0.0125076	0.0513707	11.1719	WT	∆∆
YDL125C	6	4	306.13	0.0125636	0.0514922	1.34862	∆∆	WT
YBR154C	3	2	122.61	0.0126643	0.0517963	2.61302	∆∆	WT
YKR080W	10	7	308.81	0.0128737	0.052543	1.77813	∆∆	WT
YOR112W	7	2	49.24	0.0130555	0.0531739	21.6559	∆∆	WT
YDR035W	16	11	652.18	0.0131346	0.0533849	1.22597	WT	∆∆
YHR021C	5	5	278.91	0.013749	0.0557661	1.36238	∆∆	WT
YLR347C	7	6	174.63	0.013863	0.0561119	1.43026	∆∆	WT
YOL098C	12	7	180.47	0.0139586	0.0563822	1.63515	∆∆	WT
YKL191W	6	3	94.65	0.0139947	0.0564115	1.62582	WT	∆∆
YPR028W	3	2	38.64	0.014104	0.0567351	2.19165	WT	∆∆
YLR185W	5	4	200.47	0.0141532	0.0568163	2.14535	WT	∆∆
YLR291C	5	3	89.48	0.0142404	0.0570492	1.59707	WT	∆∆
YLR179C	9	6	405.43	0.0143943	0.0575479	1.33671	WT	∆∆
YDL060W	4	4	102.18	0.0145258	0.0579549	1.30781	∆∆	WT
YHR132C	3	2	68.37	0.0146435	0.0583054	1.48562	WT	∆∆
YDR381W	10	4	375.11	0.0146862	0.0583072	1.40433	WT	∆∆
YLR447C	11	11	404.93	0.0147035	0.0583072	1.27429	∆∆	WT
YKL104C	34	28	1021.66	0.0148441	0.0587455	1.29341	∆∆	WT
YBR256C	9	9	344.77	0.0149077	0.0588778	1.68653	WT	∆∆
YGR106C	1	1	20.57	0.014944	0.0589023	2.17856	∆∆	WT
YIR037W	6	4	201.61	0.0150456	0.0591662	1.57533	WT	∆∆
YDR012W	19	2	1453.04	0.0150715	0.0591662	1.63831	∆∆	WT
YOR254C	15	7	291.08	0.0152064	0.0593443	2.47451	∆∆	WT
YML024W	11	9	802.35	0.0152156	0.0593443	1.31557	∆∆	WT
YOR261C	8	6	198.64	0.015224	0.0593443	1.38668	∆∆	WT
YDL116W	3	1	39.45	0.0152383	0.0593443	5.91519	∆∆	WT
YMR203W	3	3	95.53	0.0153028	0.0594772	1.60936	∆∆	WT
YMR131C	9	7	287.8	0.0154515	0.0599357	1.32557	WT	∆∆
YFR002W	8	3	132.58	0.0159726	0.0617954	36.639	∆∆	WT
YDR170W-A	7	1	239.38	0.0159941	0.0617954	563.706	∆∆	WT
YJR103W	11	6	177.82	0.0161727	0.0623051	1.43167	WT	∆∆
YOL076W	12	2	65.03	0.0161898	0.0623051	6.71491	WT	∆∆
YPR154W	2	2	89.96	0.0162868	0.0625552	2.42466	∆∆	WT
YGL011C	16	13	592.49	0.0163679	0.0627435	1.21248	∆∆	WT
YOR163W	3	3	84.72	0.0166808	0.0637047	1.91867	WT	∆∆
YIR036C	5	4	178.14	0.0167158	0.0637047	2.86157	∆∆	WT
YGR080W	8	7	240.29	0.0167164	0.0637047	1.29067	∆∆	WT
YER055C	16	15	770.98	0.017052	0.0648572	1.11866	WT	∆∆
YPL094C	3	2	30.41	0.0171208	0.0648803	1.85082	∆∆	WT
YDR394W	10	7	376.86	0.0171244	0.0648803	1.45787	∆∆	WT
YLR027C	21	19	1088.62	0.0171643	0.0649055	1.23848	WT	∆∆
YNR038W	5	1	65.53	0.0172173	0.0649804	8.15791	WT	∆∆
YJL172W	11	10	292.54	0.0173711	0.0652871	1.6766	WT	∆∆
YDR165W	8	7	194.85	0.0174034	0.0652871	1.3204	WT	∆∆
YLR325C	5	3	273.77	0.0174218	0.0652871	1.38479	∆∆	WT
YKL069W	4	2	54.42	0.0174322	0.0652871	1.75744	∆∆	WT
YFL034C-A	5	2	135.17	0.0175351	0.0655472	2.1023	WT	∆∆
YFR006W	10	6	124.46	0.0178908	0.066749	2.11092	∆∆	WT
YBR247C	8	6	254.66	0.0180906	0.067366	2.38587	WT	∆∆
YJL178C	4	3	52.09	0.0182406	0.0677952	5.56927	WT	∆∆
YGR157W	10	4	187.56	0.0183387	0.0680305	2.26566	WT	∆∆
YNL313C	8	6	200.37	0.0184174	0.0681052	3.63813	∆∆	WT
YHR039C-A	8	5	369.45	0.0184285	0.0681052	1.52878	WT	∆∆
YLR370C	6	3	153.26	0.0186098	0.0686043	1.58584	∆∆	WT
YGL123W	19	13	891.28	0.0186935	0.0686043	1.48393	∆∆	WT
YKL211C	15	11	321.77	0.0187309	0.0686043	1.28647	WT	∆∆
YBL056W	10	4	330.7	0.0187331	0.0686043	1.51022	∆∆	WT
YJR060W	4	2	130.56	0.018739	0.0686043	1.573	∆∆	WT
YBR072W	11	10	734.56	0.0190009	0.069393	1.30539	∆∆	WT
YLR384C	17	11	389.75	0.0190254	0.069393	1.29399	WT	∆∆
YKL157W	31	25	1394.4	0.0192454	0.0700647	1.21363	∆∆	WT
YDR182W	6	3	65.93	0.0195265	0.0709561	1.93588	∆∆	WT
YLL040C	23	8	253.53	0.0196901	0.0714177	3.30645	WT	∆∆
YLL029W	8	2	61.98	0.0200939	0.0727474	3.73717	WT	∆∆
YCR030C	4	4	154.35	0.0201968	0.0728395	1.61618	∆∆	WT
YBR022W	2	1	21.79	0.0202293	0.0728395	3.8369	∆∆	WT
YJL081C	2	1	47.08	0.0202311	0.0728395	4.72875	WT	∆∆
YGR232W	4	4	100.36	0.0203072	0.0729791	2.30566	WT	∆∆
YDR299W	5	4	85.91	0.0203613	0.0730078	1.58786	∆∆	WT
YCR073W-A	5	4	189.29	0.0203899	0.0730078	1.33661	∆∆	WT
YOR165W	13	9	170.71	0.0206509	0.0738071	2.09066	∆∆	WT
YMR012W	34	26	1325.89	0.0209156	0.0746169	1.22609	∆∆	WT
YAL044W-A	3	2	31.34	0.021056	0.0749808	3.11022	WT	∆∆
YJL214W	2	1	20.17	0.021219	0.0753823	4.10831	WT	∆∆
YML057W	3	3	62.38	0.0212631	0.0753823	1.402	∆∆	WT
YDR170C	23	15	483.96	0.0212844	0.0753823	1.87205	∆∆	WT
YKR095W	24	14	279.39	0.0213438	0.0754559	1.72776	∆∆	WT
YPL131W	20	15	1006.13	0.0214425	0.0755584	1.30347	∆∆	WT
YJL033W	6	3	109.42	0.0214501	0.0755584	3.11882	∆∆	WT
YDL122W	7	4	106.39	0.0217266	0.0763949	1.5523	WT	∆∆
YDR381C-A	2	2	31.57	0.0218189	0.0765246	10.4288	WT	∆∆
YBR121C	43	36	1941.61	0.0218418	0.0765246	1.27626	∆∆	WT
YDR101C	17	13	468.36	0.0219148	0.0766428	1.21877	∆∆	WT
YLR295C	4	3	94.54	0.0220475	0.0769694	1.60784	WT	∆∆
YIL076W	7	5	212.85	0.0220928	0.0769901	1.84855	∆∆	WT
YOL151W	14	11	471.25	0.0221779	0.077149	1.3854	∆∆	WT
YBR177C	10	9	482.57	0.0222793	0.0772358	1.67106	WT	∆∆
YEL047C	20	13	683.74	0.0222818	0.0772358	1.32221	WT	∆∆
YCL045C	9	2	183.31	0.022517	0.0779128	2.75806	∆∆	WT
YBR272C	7	2	56.82	0.0225822	0.0780003	16.5881	∆∆	WT
YBR112C	12	9	315.72	0.0226513	0.0781009	1.5341	∆∆	WT
YBL004W	10	2	130.78	0.0228689	0.0787125	12.1322	∆∆	WT
YJL173C	2	2	114.9	0.0229551	0.0787892	1.28254	∆∆	WT
YGR158C	3	3	73.47	0.0229718	0.0787892	1.67458	WT	∆∆
YKL151C	4	2	65.25	0.0232662	0.0796592	5.42959	∆∆	WT
YLR249W	66	47	3683.35	0.0233754	0.0798932	1.36911	∆∆	WT
YJR002W	10	3	132.51	0.0237144	0.080834	1.62854	WT	∆∆
YML103C	9	5	206	0.0237334	0.080834	4.20814	∆∆	WT
YGR178C	3	3	37.57	0.0240043	0.0816147	3.62812	WT	∆∆
YCR081C-A	2	2	16.17	0.0240582	0.0816452	1.46772	∆∆	WT
YBR011C;YPL112C	24	19	1269.67	0.0240968	0.0816452	1.18649	∆∆	WT
YER048C	10	7	429.61	0.0241761	0.0817719	1.26582	∆∆	WT
YMR116C	21	19	1314.38	0.0243985	0.0823817	1.22289	∆∆	WT
YNL241C	23	18	929.55	0.0245679	0.0828108	1.18915	WT	∆∆
YGL256W	3	3	46.11	0.0246707	0.0830141	1.68532	WT	∆∆
YPR118W	9	7	268.85	0.0248876	0.0836	1.4504	∆∆	WT
YKR059W	26	21	1897.25	0.0250424	0.0839759	1.24379	∆∆	WT
YKR071C	5	4	147.05	0.0252229	0.0844364	1.15074	WT	∆∆
YGL189C	4	3	252.24	0.0253703	0.0846269	1.36649	∆∆	WT
YDR408C	6	6	352.86	0.0254039	0.0846269	1.2284	∆∆	WT
YNL312W	3	2	56.5	0.0254097	0.0846269	4.44591	WT	∆∆
YER165W	29	23	1473.94	0.0255585	0.0849777	1.20412	WT	∆∆
YBL068W	10	3	238.74	0.0257652	0.0855193	2.76538	WT	∆∆
YDR059C	2	1	70.91	0.0259124	0.0858622	7.7968	∆∆	WT
YNL280C	2	2	72.65	0.0260597	0.0860803	4.20327	WT	∆∆
YBL017C	18	9	327.35	0.0260663	0.0860803	1.29937	WT	∆∆
YNL180C	4	4	64.01	0.0263473	0.0868616	1.55439	∆∆	WT
YBR156C	7	1	52.26	0.0265147	0.0872665	230.415	WT	∆∆
YDL219W	1	1	15.14	0.0268292	0.0880826	5.44752	WT	∆∆
YFL017C	3	2	47.27	0.0268528	0.0880826	1.47835	WT	∆∆
YNL307C	14	9	363.68	0.0272792	0.0891747	1.28931	∆∆	WT
YKL180W	12	1	851	0.0273365	0.0891747	1.38786	∆∆	WT
YNL069C	20	8	705.5	0.0273632	0.0891747	1.34455	WT	∆∆
YHR029C	9	6	446.67	0.0273682	0.0891747	1.81355	WT	∆∆
YIL070C	4	3	111.74	0.0276994	0.0900948	1.28796	WT	∆∆
YLR335W	15	11	354.47	0.027788	0.0900948	1.33514	WT	∆∆
YOR198C	31	19	1046.37	0.0278179	0.0900948	1.3415	WT	∆∆
YAR075W	5	1	211.03	0.0278501	0.0900948	1.81168	∆∆	WT
YDL201W	4	4	195.31	0.027881	0.0900948	2.40306	WT	∆∆
YDL092W	2	2	93.48	0.0281523	0.0908212	1.17423	∆∆	WT
YOL077C	4	3	79.47	0.0282494	0.0909631	1.13472	∆∆	WT
YLR008C	4	2	103.3	0.0282893	0.0909631	2.02283	∆∆	WT
YLR017W	7	5	150.71	0.0283438	0.0909888	1.43043	∆∆	WT
YER023W	14	10	407.07	0.0283988	0.0910159	1.22523	∆∆	WT
YPR129W	5	5	237.11	0.0285479	0.0912857	1.76119	WT	∆∆
YER004W	5	3	63.57	0.0285764	0.0912857	1.76938	WT	∆∆
YDR188W	18	13	816.68	0.0288591	0.0920384	1.24416	∆∆	WT
YNL001W	6	1	75.78	0.0292353	0.0930864	2.46308	WT	∆∆
YHR137C-A	2	2	26.59	0.0295126	0.0938165	2.58783	WT	∆∆
YNL098C	7	5	246.45	0.0296522	0.0941072	1.87993	∆∆	WT
YBR249C	19	14	741.56	0.029746	0.094252	1.32684	WT	∆∆
YMR149W	2	2	128.4	0.0298118	0.0943075	37.12	∆∆	WT
YML094W	6	4	132.95	0.030053	0.094802	1.21138	WT	∆∆
YOR155C	5	3	72.13	0.0300651	0.094802	2.74167	WT	∆∆
YIL108W	4	4	71.55	0.0302202	0.0951375	1.91905	∆∆	WT
YPR160W	15	12	422.12	0.0305209	0.0959297	1.54132	∆∆	WT
YLR276C	5	3	121.46	0.0305964	0.0960128	1.87063	∆∆	WT
YDR272W	5	4	165.46	0.0308058	0.0965149	1.84914	∆∆	WT
YDL078C	7	3	209.85	0.0310215	0.0970354	1.56101	WT	∆∆
YKL144C	1	1	13.26	0.0312687	0.0975271	5.12486	WT	∆∆
YEL003W	2	1	38.01	0.0312785	0.0975271	1.67365	WT	∆∆
YOR272W	8	7	168.38	0.031357	0.0975465	1.84151	∆∆	WT
YJR009C	35	6	2131.41	0.0313845	0.0975465	1.20788	WT	∆∆
YGL137W	27	24	921.45	0.0316225	0.0980186	1.21026	∆∆	WT
YHR025W	12	11	489.67	0.0316537	0.0980186	1.20056	WT	∆∆
YCL018W	4	3	66.57	0.0317132	0.0980186	12.251	WT	∆∆
YOR326W	25	14	646.19	0.031737	0.0980186	2.47046	∆∆	WT
YFR001W	2	2	130.53	0.0319574	0.0985437	1.42071	WT	∆∆
YOR191W	16	3	131.9	0.0321721	0.0990495	4.08392	∆∆	WT
YLR009W	3	2	17.07	0.0322993	0.0992849	9.38553	WT	∆∆
YBL032W	5	1	36.21	0.0324472	0.099583	2.13808	WT	∆∆
YPL184C	6	2	71.69	0.0327472	0.100277	1.73872	∆∆	WT
YDR390C	5	1	57.73	0.0327758	0.100277	9.64285	∆∆	WT
YDR486C	4	3	66.56	0.0337226	0.102626	1.35542	∆∆	WT
YDR200C	3	1	42.83	0.0337284	0.102626	3.04069	WT	∆∆
YPL127C	8	5	155.03	0.0338013	0.102626	1.65335	WT	∆∆
YBR109C	8	7	573.99	0.0338037	0.102626	1.1773	WT	∆∆
YDR477W	8	3	96.4	0.0338062	0.102626	2.65484	∆∆	WT
YPL143W	7	1	401.12	0.0340143	0.103097	1.31334	∆∆	WT
YAR015W	21	12	947.1	0.0341716	0.103414	1.47055	∆∆	WT
YOR027W	29	25	1215.08	0.0345947	0.104533	1.13543	WT	∆∆
YFL018C	23	19	890.38	0.0348084	0.105016	1.18142	WT	∆∆
YDR368W	14	8	509.78	0.0349841	0.105384	1.19212	∆∆	WT
YML028W	14	12	932.85	0.0351351	0.105588	1.17791	∆∆	WT
YLR253W	4	1	25.97	0.03516	0.105588	5.49932	WT	∆∆
YER136W	17	12	363.68	0.0352989	0.105843	1.29071	∆∆	WT
YLR200W	6	3	342.11	0.0355328	0.106152	1.19362	∆∆	WT
YDL132W	8	4	151.92	0.0355414	0.106152	1.93287	∆∆	WT
YLR420W	12	9	197.45	0.035565	0.106152	1.59793	WT	∆∆
YOL052C	4	4	76.75	0.0356958	0.10638	1.3855	WT	∆∆
YLR268W	2	1	43.81	0.0358028	0.106472	2.06969	∆∆	WT
YOR085W	3	2	51.33	0.0358355	0.106472	31.4148	∆∆	WT
YBR009C	5	5	263.59	0.0360623	0.106983	1.62741	WT	∆∆
YOR167C	4	3	241.84	0.0361837	0.107181	1.26654	∆∆	WT
YOR369C	9	9	862.23	0.0364763	0.107749	1.30629	∆∆	WT
YGR264C	30	25	1093.44	0.036486	0.107749	1.15721	WT	∆∆
YDR500C	2	1	87.03	0.036567	0.107826	4.0038	WT	∆∆
YGL200C	4	4	127.75	0.0367347	0.108157	5.61881	∆∆	WT
YLR109W	15	14	913.02	0.036962	0.108663	1.24261	∆∆	WT
YPL154C	12	10	673.4	0.0371883	0.109122	1.19261	WT	∆∆
YLR258W	6	5	186.3	0.0372299	0.109122	1.75523	WT	∆∆
YBR261C	3	1	22.05	0.0373562	0.109328	5.21618	WT	∆∆
YGL100W	3	3	71.56	0.0376504	0.110025	3.40592	∆∆	WT
YHR005C-A	2	2	116.07	0.037747	0.110142	1.49763	WT	∆∆
YKL142W	11	8	623.96	0.0381419	0.110865	1.19034	∆∆	WT
YDL086W	9	7	194.32	0.0381444	0.110865	1.16928	∆∆	WT
YCL043C	25	19	1411.02	0.0381649	0.110865	1.16645	∆∆	WT
YGL008C	42	10	2113.58	0.038456	0.111545	2.20644	∆∆	WT
YMR264W	4	4	146.31	0.0387809	0.112321	2.95262	∆∆	WT
YNL104C	39	19	1726.5	0.0389898	0.112759	1.18545	WT	∆∆
YHR113W	7	5	110.34	0.0392478	0.113337	1.80345	∆∆	WT
YOL097C	14	9	448.17	0.0395021	0.113811	1.28983	WT	∆∆
YJL111W	15	11	592.91	0.0395283	0.113811	1.32365	∆∆	WT
YHR099W	22	5	167.91	0.0396074	0.113871	1.96028	∆∆	WT
YPR139C	1	1	45.78	0.0400176	0.114882	Inf	WT	∆∆
YOR217W	8	2	83.72	0.0401201	0.115007	2.5261	WT	∆∆
YDL061C	6	5	308.65	0.0404031	0.115649	1.94687	WT	∆∆
YDR267C	3	3	45.34	0.0404953	0.115743	1.61278	WT	∆∆
YDL141W	4	2	29.82	0.0407072	0.116099	1.44297	WT	∆∆
YOR160W	2	2	38.66	0.0407933	0.116099	2.72722	∆∆	WT
YGR060W	1	1	45.1	0.0407979	0.116099	Inf	WT	∆∆
YNL064C	14	14	616.44	0.0410952	0.116679	1.16784	∆∆	WT
YMR276W	8	7	220.96	0.0411213	0.116679	1.5305	∆∆	WT
YHR193C	11	11	509.54	0.041182	0.116682	1.25141	∆∆	WT
YMR140W	2	1	16.26	0.0412511	0.116709	5.45413	∆∆	WT
YBR143C	19	15	846.74	0.0417419	0.117927	1.31664	∆∆	WT
YOR091W	6	4	176.9	0.0423072	0.119352	1.75805	∆∆	WT
YKL035W	28	21	1177.46	0.0424514	0.119586	1.39321	∆∆	WT
YDR404C	4	2	73.38	0.0426958	0.12008	1.7533	WT	∆∆
YAL029C	8	1	112.67	0.0427496	0.12008	2.912	WT	∆∆
YBL072C	11	10	685.07	0.0431322	0.120981	1.19942	∆∆	WT
YBR160W	6	4	111.09	0.0432658	0.121181	1.90539	WT	∆∆
YCL028W	7	4	202.69	0.0437198	0.122177	1.306	∆∆	WT
YIL039W	1	1	16.68	0.0437464	0.122177	19.421	WT	∆∆
YJR099W	2	1	21.08	0.0440369	0.122608	2.04119	∆∆	WT
YOL144W	3	1	31.73	0.0440936	0.122608	30.283	WT	∆∆
YGL103W	9	7	338.98	0.0441872	0.122608	1.36561	∆∆	WT
YER049W	14	9	370.14	0.0442067	0.122608	1.35089	WT	∆∆
YHR182W	14	7	118.01	0.0442141	0.122608	1.68531	WT	∆∆
YDL213C	5	3	77.33	0.0443232	0.122721	1.55275	WT	∆∆
YLR056W	4	2	36.96	0.0443803	0.122721	3.62643	WT	∆∆
YJL008C	19	13	750.71	0.0445351	0.122975	1.23188	∆∆	WT
YGL150C	13	5	55.32	0.0447773	0.123469	4.12626	∆∆	WT
YOR120W	5	2	204.01	0.0448631	0.123532	2.20675	WT	∆∆
YLR248W	8	4	113.13	0.0450824	0.123961	1.66363	WT	∆∆
YBR079C	35	24	1111.37	0.0456009	0.12521	1.16212	∆∆	WT
YLR229C	2	1	61.53	0.0458419	0.125695	2.43664	WT	∆∆
YOL005C	3	2	48.7	0.046198	0.126494	1.96375	WT	∆∆
YNL141W	9	7	293.95	0.0462623	0.126494	1.33219	WT	∆∆
YDR212W	18	11	630.74	0.0466572	0.127395	1.24374	∆∆	WT
YKL129C	22	4	287.05	0.0476506	0.129815	2.12464	WT	∆∆
YER030W	6	4	150.86	0.0477201	0.129815	1.91077	WT	∆∆
YML078W	6	3	290.56	0.0477429	0.129815	1.4374	WT	∆∆
YDR023W	34	28	1627.88	0.0484068	0.131438	1.13441	∆∆	WT
YDL192W	13	2	714.79	0.0485825	0.131592	1.32761	∆∆	WT
YMR038C	8	5	300.41	0.048598	0.131592	1.25113	WT	∆∆
YML052W	4	2	100.27	0.0488259	0.132026	2.47263	WT	∆∆
YDR238C	24	15	930.11	0.0490393	0.13242	1.10503	∆∆	WT
YDL212W	2	1	39.46	0.0492117	0.132572	3.56633	WT	∆∆
YFR047C	4	2	140.47	0.0492388	0.132572	1.3175	∆∆	WT
YKL080W	16	14	862.98	0.0492993	0.132572	1.36472	∆∆	WT
YPL208W	4	2	48.47	0.0496144	0.133236	2.04752	WT	∆∆
YKL093W	2	1	21.54	0.0497238	0.133347	2.94443	WT	∆∆
YHR104W	15	11	643.91	0.0498485	0.133437	1.53766	∆∆	WT
YBR101C	8	6	137.28	0.0498937	0.133437	1.77404	WT	∆∆
YNR034W	2	2	77.03	0.0502479	0.1342	1.54876	∆∆	WT
YDL145C	32	26	925.58	0.0505886	0.134926	1.27527	∆∆	WT
YDR057W	5	1	47.39	0.0508057	0.135321	2.43443	WT	∆∆
YHR074W	9	8	205.42	0.0510662	0.135693	1.41561	WT	∆∆
YNL102W	13	4	63.98	0.0510843	0.135693	3.66835	∆∆	WT
YPL032C	7	5	110.36	0.0512916	0.136058	1.35251	∆∆	WT
YML072C	21	14	692.21	0.0515156	0.136467	1.94431	WT	∆∆
YLR093C	1	1	19.42	0.0516981	0.136666	Inf	WT	∆∆
YOR074C	6	4	154	0.0517305	0.136666	1.50142	∆∆	WT
YML001W	7	4	328.18	0.052618	0.138823	1.41617	WT	∆∆
YKR093W	3	1	20.16	0.052742	0.138963	1.73873	WT	∆∆
YDR002W	11	5	256.62	0.0533197	0.140296	1.26003	∆∆	WT
YER048W-A	5	2	59.99	0.0536549	0.140917	2.67101	WT	∆∆
YGR277C	5	4	90.56	0.0536997	0.140917	3.63617	∆∆	WT
YPR020W	2	1	63.05	0.0538445	0.141107	3.33794	WT	∆∆
YDL160C	10	9	320.3	0.0540892	0.141474	1.21406	∆∆	WT
YNR016C	96	77	3665.09	0.0541632	0.141474	1.18021	∆∆	WT
YBL058W	12	7	382.62	0.0542016	0.141474	1.14424	∆∆	WT
YLL001W	13	11	333.6	0.0547176	0.14263	1.24022	∆∆	WT
YLR153C	29	24	1293.21	0.0560154	0.145819	1.179	WT	∆∆
YNL220W	22	20	1040.13	0.0564841	0.146844	1.14431	WT	∆∆
YLR356W	2	2	45.48	0.0567226	0.147268	7.51923	∆∆	WT
YKR014C	7	6	235.44	0.0575293	0.149045	1.32855	WT	∆∆
YHR024C	6	3	100.79	0.0575596	0.149045	1.26924	∆∆	WT
YDL136W	10	6	742.34	0.0577735	0.149401	1.27184	WT	∆∆
YPL091W	19	11	594.04	0.0580289	0.149863	1.17644	∆∆	WT
YDL205C	6	3	94.09	0.0583436	0.150471	1.34985	∆∆	WT
YJR142W	2	1	46.84	0.0584183	0.150471	7.27443	WT	∆∆
YKL007W	9	7	229.24	0.0588341	0.151343	1.50954	WT	∆∆
YDL075W	10	1	531.59	0.0589141	0.15135	1.88252	WT	∆∆
YBR025C	28	21	1260.88	0.0595145	0.152691	1.13248	∆∆	WT
YNL087W	7	4	181.15	0.0605196	0.155067	5.17076	∆∆	WT
YCL050C	12	12	483.18	0.0609182	0.155884	1.15783	WT	∆∆
YER148W	4	1	46.08	0.0611762	0.156339	3.97522	WT	∆∆
YDL124W	18	16	701.86	0.0620416	0.158344	1.25589	∆∆	WT
YMR189W	22	16	719.56	0.0626348	0.159649	1.15868	WT	∆∆
YDR141C	15	3	90.6	0.0630083	0.160392	2.62281	WT	∆∆
YPR069C	18	17	856.1	0.06326	0.160824	1.27862	∆∆	WT
YFR010W	10	9	283.56	0.0642866	0.163221	1.26066	WT	∆∆
YMR242C	17	14	871.88	0.0645921	0.163784	1.22274	∆∆	WT
R0020C	4	2	73.98	0.0648365	0.164191	1.62649	∆∆	WT
YGR169C-A	3	1	125.29	0.0649809	0.164341	50.9025	∆∆	WT
YIL002W-A	6	5	134.85	0.0650638	0.164341	1.47375	WT	∆∆
YNR034W-A	1	1	101.48	0.0651648	0.164384	2.06545	∆∆	WT
YPL266W	8	3	133.57	0.0655101	0.165042	2.1465	WT	∆∆
YGL184C	4	2	68.59	0.0659413	0.165914	1.75435	∆∆	WT
YLR257W	8	8	210.66	0.066198	0.166346	2.26483	WT	∆∆
YNL016W	9	6	171.1	0.0666025	0.167147	1.34278	WT	∆∆
YER043C	31	27	1700.62	0.0670663	0.168096	1.18529	∆∆	WT
YOR332W	15	13	775.73	0.0672709	0.168224	1.37333	∆∆	WT
YDR011W	13	8	200.56	0.0672897	0.168224	1.98583	WT	∆∆
YJL168C	10	2	66.87	0.0678904	0.169291	1.61759	WT	∆∆
YPR062W	6	6	270.93	0.0679618	0.169291	1.14498	WT	∆∆
YLR206W	4	1	70.64	0.0680488	0.169291	2.69619	WT	∆∆
YBR089C-A	3	1	75.17	0.0680628	0.169291	1.41331	∆∆	WT
YMR246W	19	12	415.49	0.068681	0.170522	1.55979	WT	∆∆
YNL049C	3	1	71.67	0.068732	0.170522	172.665	WT	∆∆
YPR036W	16	13	467.37	0.0688341	0.170559	1.38677	∆∆	WT
YDL100C	8	5	316.84	0.0691916	0.171227	1.25799	∆∆	WT
YMR216C	4	3	94	0.0693718	0.171456	2.06832	WT	∆∆
YOR271C	4	3	119.81	0.0711746	0.175496	3.20009	∆∆	WT
YLR196W	9	6	372.71	0.0711859	0.175496	1.39039	∆∆	WT
YGR123C	9	5	189.11	0.071614	0.176329	1.43301	∆∆	WT
YML106W;YMR271C	11	7	623.26	0.0718066	0.176581	1.06165	∆∆	WT
YDL195W	32	24	961.2	0.0719475	0.176705	1.12335	∆∆	WT
YLR348C	8	4	198.52	0.0723875	0.177168	1.53281	∆∆	WT
YOR117W	18	13	502.55	0.0724728	0.177168	1.18056	∆∆	WT
YEL057C	2	1	23.8	0.0724801	0.177168	Inf	∆∆	WT
YJL208C	1	1	15.85	0.0724985	0.177168	23.4977	WT	∆∆
YOR375C	25	15	1776.25	0.0727102	0.177464	1.13472	∆∆	WT
YPL105C	9	4	103.01	0.0729232	0.177607	1.5479	∆∆	WT
YKL114C	5	3	81.23	0.0729506	0.177607	1.68526	∆∆	WT
YNL099C	1	1	31.1	0.0731744	0.17793	2.2202	WT	∆∆
YPR183W	10	8	213.56	0.0747866	0.181381	1.24264	WT	∆∆
YDR120C	11	4	111.8	0.0748475	0.181381	1.27317	WT	∆∆
YER105C	11	4	124.06	0.0749384	0.181381	2.20494	∆∆	WT
YJR123W	16	14	1023.59	0.0750337	0.181381	1.45425	∆∆	WT
YIL116W	13	9	470.89	0.0750574	0.181381	1.17645	WT	∆∆
YGR118W	11	10	362.75	0.0757095	0.182731	1.30069	WT	∆∆
YML120C	4	3	44.72	0.0758332	0.182804	2.80797	WT	∆∆
YHR049W	10	9	263.94	0.0761075	0.183239	1.34217	∆∆	WT
YGL234W	37	32	1842.94	0.0768971	0.184912	1.23129	∆∆	WT
YPR063C	1	1	19.22	0.0775128	0.186164	13.3552	∆∆	WT
YNL121C	21	13	630.59	0.0778024	0.186522	1.39687	WT	∆∆
YGR184C	13	7	123.36	0.0778528	0.186522	26.4281	∆∆	WT
YGL056C	6	4	99.44	0.0781325	0.186963	3.69628	∆∆	WT
YEL024W	2	1	100.02	0.078665	0.188007	2.95139	WT	∆∆
YPR189W	11	5	119.25	0.0792885	0.189171	3.12707	∆∆	WT
YGL076C	21	1	1074.63	0.0793454	0.189171	3.41158	WT	∆∆
YKR042W	1	1	22.33	0.0801655	0.190893	2.99955	WT	∆∆
YGR271C-A	4	2	79.86	0.0804813	0.191412	1.64523	WT	∆∆
YGL238W	9	7	229.27	0.0807549	0.191789	1.24616	∆∆	WT
YHL011C	14	12	478.64	0.0808357	0.191789	1.20045	∆∆	WT
YJL121C	7	6	207.14	0.081074	0.192121	1.21757	∆∆	WT
YIL124W	6	5	195.28	0.08141	0.192683	1.9613	∆∆	WT
YBR052C	3	3	126.73	0.082068	0.194006	1.93808	∆∆	WT
YAL003W	17	13	849.4	0.0821753	0.194025	1.45347	WT	∆∆
YOL027C	10	6	206.16	0.0825774	0.194739	1.60826	WT	∆∆
YDL166C	3	2	89.06	0.0830418	0.195598	1.76333	∆∆	WT
YPL237W	18	12	555.62	0.0834764	0.196385	1.12672	WT	∆∆
YER164W	8	2	98.72	0.0836083	0.196459	3.76982	WT	∆∆
YPL146C	8	3	82.15	0.0838977	0.196903	1.98625	∆∆	WT
YJL024C	1	1	29.73	0.0841428	0.197241	2.8462	WT	∆∆
YOL039W	7	6	482.43	0.0843036	0.197381	2.04733	∆∆	WT
YEL011W	5	4	53.62	0.0846587	0.197619	1.96406	∆∆	WT
YEL042W	8	6	194.53	0.0846904	0.197619	1.2443	WT	∆∆
YKL196C	9	6	425.7	0.0848662	0.197619	1.56277	∆∆	WT
YPL028W	20	17	1119.52	0.0848942	0.197619	1.2665	∆∆	WT
YBR207W	2	1	51.21	0.0849104	0.197619	1.68175	WT	∆∆
YBR042C	4	2	45.75	0.0859814	0.199786	2.82034	WT	∆∆
YLR378C	6	3	112.8	0.0860904	0.199786	1.84406	∆∆	WT
YLR390W-A	3	3	52.94	0.0862272	0.199786	1.42997	∆∆	WT
YMR056C	9	2	146.4	0.0864063	0.199786	1.51992	WT	∆∆
YPL086C	9	6	191.22	0.0864677	0.199786	1.26047	∆∆	WT
YJR004C	3	3	68.99	0.0864836	0.199786	1.52725	∆∆	WT
YML131W	4	3	55.29	0.0865567	0.199786	1.4513	WT	∆∆
YNL292W	2	2	64.92	0.0868601	0.200249	1.98964	WT	∆∆
YMR207C	14	1	223.13	0.0873268	0.200962	2.95432	∆∆	WT
YDR328C	8	6	249.81	0.0873748	0.200962	1.21922	WT	∆∆
YMR220W	7	4	210.79	0.0880964	0.202384	1.35401	WT	∆∆
YJL167W	14	7	684.69	0.0886169	0.203341	1.17133	WT	∆∆
YNL268W	4	3	77.13	0.0890128	0.204009	34.4344	∆∆	WT
YNL263C	2	2	31.54	0.0894815	0.204807	1.65088	WT	∆∆
YDR293C	15	12	371.47	0.0895703	0.204807	1.42991	∆∆	WT
YIL115C	15	9	236.04	0.0897947	0.20508	1.42423	∆∆	WT
YPL225W	10	7	554.29	0.0906018	0.206682	1.20867	∆∆	WT
YDL237W	1	1	17.25	0.0907438	0.206765	12.4015	WT	∆∆
YIL074C	17	7	729.63	0.0913365	0.207873	1.38925	WT	∆∆
YNL045W	4	4	100.95	0.0915423	0.207951	1.13947	WT	∆∆
YJL034W	30	19	1088.09	0.0915834	0.207951	1.27892	WT	∆∆
YPL260W	11	6	218.47	0.0919275	0.20849	1.26164	∆∆	WT
YGR269W	2	1	20.24	0.0921222	0.208509	2.54334	WT	∆∆
YDR380W	2	1	19.05	0.0921494	0.208509	1.28522	∆∆	WT
YIL033C	10	8	205.64	0.0925642	0.209206	1.15345	∆∆	WT
YGL139W	4	2	52.39	0.092845	0.209598	1.78856	∆∆	WT
YHR183W	32	20	1652.72	0.0931714	0.210092	1.12523	∆∆	WT
YIL145C	4	3	69.8	0.0936937	0.211027	2.27516	∆∆	WT
YGR162W	23	16	620.27	0.093962	0.211387	1.34147	WT	∆∆
YER094C	5	2	303.05	0.0941836	0.211643	1.3047	∆∆	WT
YHR039C	8	7	156.69	0.0958024	0.215033	1.52151	∆∆	WT
YIL069C	9	6	456.39	0.0960106	0.215079	1.22667	∆∆	WT
YGR124W	30	19	1307.22	0.0960428	0.215079	1.21058	∆∆	WT
YMR075W	9	1	84.45	0.0965692	0.215813	1.99546	WT	∆∆
YGR214W	13	2	665.01	0.0965913	0.215813	1.84184	∆∆	WT
YPL078C	4	3	278.22	0.0973759	0.21702	1.64795	WT	∆∆
YBR068C	4	2	79.17	0.0974084	0.21702	27.0043	∆∆	WT
YDR292C	4	2	84.05	0.0974647	0.21702	1.62104	WT	∆∆
YKL140W	1	1	41.47	0.0977358	0.217376	2.7145	WT	∆∆
YNL281W	4	4	239.61	0.0980225	0.217649	1.26773	WT	∆∆
YBL064C	7	5	252.27	0.0980812	0.217649	1.23206	∆∆	WT
YBR058C	5	3	107.33	0.0983457	0.217989	2.41511	∆∆	WT
YLR450W	3	1	33.29	0.0987434	0.218622	2.18843	WT	∆∆
YAR035W	4	3	65.04	0.0988995	0.21872	1.17624	∆∆	WT
YPR112C	7	3	115.78	0.0993906	0.219558	2.04433	WT	∆∆
YOR039W	4	3	90.38	0.0999507	0.220546	1.79172	WT	∆∆
YBR205W	7	4	98.49	0.100588	0.221701	1.76704	WT	∆∆
YOR153W	16	9	477.72	0.101449	0.223349	1.39285	WT	∆∆
YOR251C	6	4	270.08	0.101667	0.223575	1.77819	∆∆	WT
YDR395W	11	7	323.15	0.102722	0.225643	1.75882	∆∆	WT
YGL030W	9	9	734	0.104793	0.229933	1.3581	∆∆	WT
YER070W	14	8	415.1	0.104999	0.230128	1.66863	∆∆	WT
YGL019W	1	1	36.72	0.10582	0.231666	2.27472	∆∆	WT
YKL067W	9	8	535.12	0.106112	0.232047	1.16295	∆∆	WT
YOR051C	10	6	252.74	0.106686	0.23304	1.43481	WT	∆∆
YGR284C	2	2	110.16	0.107351	0.234231	1.37294	∆∆	WT
YLR225C	4	1	47.06	0.107473	0.234236	1.63707	∆∆	WT
YNR043W	7	7	409.13	0.108084	0.235305	1.19701	WT	∆∆
YGL022W	5	3	144.12	0.108808	0.236384	3.19804	∆∆	WT
YDR155C	11	7	766.92	0.108821	0.236384	1.17997	∆∆	WT
YML092C	8	7	379.55	0.109061	0.236641	1.22569	WT	∆∆
YBR199W	3	1	26.76	0.109498	0.237157	8.24393	WT	∆∆
YPR010C-A	1	1	33.39	0.109593	0.237157	2.76802	WT	∆∆
YKL193C	7	4	166.62	0.109768	0.237157	1.22277	∆∆	WT
YMR194W	9	1	412.78	0.109784	0.237157	1.10523	WT	∆∆
YGL125W	14	9	484.64	0.11021	0.237816	1.33492	WT	∆∆
YMR229C	41	26	1058.67	0.110523	0.238228	1.49669	∆∆	WT
YPL269W	6	2	30.13	0.111223	0.239472	1.92038	WT	∆∆
YHR012W	2	1	37.98	0.112612	0.241989	1.83343	WT	∆∆
YPR024W	12	5	95.84	0.112678	0.241989	1.4263	WT	∆∆
YNL108C	8	7	162.53	0.112846	0.241989	1.30713	WT	∆∆
YJL080C	54	44	2113.36	0.112887	0.241989	1.10481	∆∆	WT
YMR125W	14	10	335.23	0.114789	0.245744	2.12671	∆∆	WT
YOL123W	5	5	156.82	0.11489	0.245744	1.29217	WT	∆∆
YDL103C	18	13	469.48	0.115125	0.245976	1.29756	∆∆	WT
YLR061W	6	3	228.12	0.115576	0.246671	1.18836	∆∆	WT
YJR047C	4	1	116.36	0.115983	0.247207	9685.07	∆∆	WT
YLR330W	14	12	462.15	0.11608	0.247207	1.17675	∆∆	WT
YCR009C	13	8	269.03	0.117899	0.250807	3.58291	∆∆	WT
YDL178W	8	6	242.9	0.118323	0.251207	1.17415	∆∆	WT
YDR502C	24	11	1313.02	0.118344	0.251207	1.08119	WT	∆∆
YKL024C	14	7	419.02	0.118892	0.251961	1.20849	∆∆	WT
YNL138W	9	7	292.65	0.119015	0.251961	1.59199	∆∆	WT
YLR216C	21	16	608.95	0.119199	0.251961	1.23063	WT	∆∆
YDR372C	8	6	209.87	0.119214	0.251961	1.40044	WT	∆∆
YHR094C	8	4	157.91	0.119485	0.25226	1.16582	WT	∆∆
YML022W	4	2	190.09	0.120027	0.253132	1.22579	∆∆	WT
YMR105C	9	7	297.05	0.120446	0.25374	1.18699	WT	∆∆
YDR346C	8	8	229.27	0.121642	0.255746	1.32293	WT	∆∆
YBR159W	6	3	148.49	0.121773	0.255746	1.43375	WT	∆∆
YOR108W	24	6	1010.84	0.12179	0.255746	1.22603	WT	∆∆
YER042W	8	7	162.55	0.122216	0.256212	1.17966	∆∆	WT
YOL012C	4	1	125.07	0.122477	0.256212	1.9871	WT	∆∆
YOL100W	10	2	79.33	0.122514	0.256212	1.39474	WT	∆∆
YNL153C	5	3	188.51	0.122536	0.256212	1.89106	WT	∆∆
YDR284C	2	1	32.72	0.123243	0.257414	1.67689	WT	∆∆
YDR177W	5	5	126.59	0.123474	0.257499	1.10628	WT	∆∆
YKR092C	3	3	44.18	0.123547	0.257499	1.51273	WT	∆∆
YGR189C	5	3	207.09	0.123825	0.257639	2.41002	∆∆	WT
YJL055W	8	7	207.75	0.123878	0.257639	1.26505	WT	∆∆
YNL178W	24	18	1496.52	0.124108	0.257845	1.19592	∆∆	WT
YIL153W	1	1	30.72	0.124263	0.257892	2.62219	∆∆	WT
YER002W	4	2	60.78	0.125052	0.259094	1.47364	WT	∆∆
YJR096W	6	4	141.1	0.125107	0.259094	1.5053	∆∆	WT
YLR397C	9	5	120.09	0.125801	0.260254	2.82226	∆∆	WT
YBR191W	10	1	462.37	0.126534	0.261277	1.19334	∆∆	WT
YJL128C	3	1	26.14	0.126563	0.261277	1.63125	∆∆	WT
YPR187W	2	2	48.83	0.126722	0.261331	1.6684	WT	∆∆
YEL055C	13	10	208.52	0.127988	0.263663	1.82633	∆∆	WT
YPR083W	5	2	25.65	0.128468	0.264374	2.53461	WT	∆∆
YBR222C	8	3	171.11	0.128838	0.264857	1.31812	WT	∆∆
YLR304C	40	30	1603.02	0.129684	0.266316	1.09495	∆∆	WT
YMR241W	8	5	389.3	0.129823	0.266321	1.9988	∆∆	WT
YDL082W	10	1	466.35	0.130163	0.266738	31.299	∆∆	WT
YHL021C	9	9	275.68	0.130483	0.267114	1.1499	WT	∆∆
YDR348C	4	1	83.36	0.130937	0.26759	2.00449	WT	∆∆
YNL067W	14	2	781.28	0.130989	0.26759	1.32633	∆∆	WT
YKR043C	10	8	561.67	0.131277	0.267899	1.19579	WT	∆∆
YPL098C	1	1	17.43	0.131677	0.268435	1.5116	∆∆	WT
YOR021C	12	10	324.96	0.131822	0.268451	1.37456	∆∆	WT
YMR080C	8	4	50.55	0.133138	0.270847	1.51849	WT	∆∆
YJL186W	6	4	187.52	0.133358	0.271014	1.437	∆∆	WT
YNL036W	3	1	33.35	0.134227	0.272234	6.76465	WT	∆∆
YGL148W	14	12	580.43	0.134237	0.272234	1.13845	WT	∆∆
YOL057W	13	8	237.61	0.13501	0.273518	1.42231	WT	∆∆
YLR324W	2	2	32.22	0.135221	0.273661	5.47005	∆∆	WT
YOR204W	26	20	1420.27	0.135613	0.274171	1.30758	∆∆	WT
YDR050C	21	18	1358.12	0.136977	0.276643	1.16609	∆∆	WT
YFL044C	2	1	25.77	0.137173	0.276752	1.66441	WT	∆∆
YML126C	21	15	889.36	0.137841	0.277814	1.07414	WT	∆∆
YDR361C	7	5	141.67	0.138117	0.278082	1.49304	∆∆	WT
YIL142W	23	13	923.25	0.138692	0.278954	1.26773	WT	∆∆
YER036C	21	17	1086.13	0.138921	0.279126	1.08612	∆∆	WT
YLR220W	3	2	61.79	0.139814	0.280634	1.19148	∆∆	WT
YGL167C	7	3	109.55	0.140052	0.280823	1.65641	∆∆	WT
YER146W	2	2	97.85	0.140209	0.280849	1.7735	∆∆	WT
YPL218W	7	7	361.99	0.141186	0.282517	1.18023	∆∆	WT
YML017W	8	5	133.7	0.143285	0.286179	1.74164	∆∆	WT
YJL087C	6	3	22.33	0.143309	0.286179	1.53327	WT	∆∆
YOR096W	18	8	503.11	0.143539	0.286345	1.20382	∆∆	WT
YDR509W	1	1	22.5	0.143798	0.286571	Inf	∆∆	WT
YMR196W	8	4	102.57	0.144082	0.286844	2.01758	∆∆	WT
YIL114C	2	1	21.46	0.144234	0.286854	4.09717	∆∆	WT
YAL036C	10	5	145.71	0.145211	0.288224	1.30892	∆∆	WT
YER010C	5	2	75.69	0.145218	0.288224	1.62241	WT	∆∆
YPL048W	19	11	781.26	0.145559	0.288609	1.1508	WT	∆∆
YKL081W	23	15	982.69	0.145726	0.288647	1.11139	WT	∆∆
YNL239W	14	8	572.69	0.146253	0.289397	1.1203	WT	∆∆
YDR324C	11	5	154.7	0.146674	0.289937	2.2885	∆∆	WT
YPL183C	14	5	122.51	0.147531	0.291337	1.41799	∆∆	WT
YPL058C	12	4	103.17	0.14775	0.291474	1.18428	∆∆	WT
YJR010W	13	11	268.54	0.148313	0.29229	1.18043	WT	∆∆
YGL101W	5	4	81.97	0.148685	0.292453	1.14525	∆∆	WT
YHR064C	25	22	1099.33	0.148695	0.292453	1.10968	WT	∆∆
YJR074W	2	2	102.89	0.149129	0.292929	1.82145	∆∆	WT
YCR072C	7	4	94.61	0.149236	0.292929	1.8031	WT	∆∆
YER083C	3	2	97.62	0.150466	0.295047	1.56422	WT	∆∆
YLR259C	30	22	2048.83	0.150976	0.29575	1.07901	∆∆	WT
YMR091C	2	2	53.07	0.152331	0.298104	2.79166	∆∆	WT
Q0250	3	2	53.23	0.153092	0.299294	2.23616	∆∆	WT
YJR135W-A	4	2	128.62	0.154307	0.301369	1.43497	WT	∆∆
YPL134C	1	1	16.17	0.155021	0.30232	3.5622	∆∆	WT
YLR069C	9	4	39.75	0.155203	0.30232	1.39967	WT	∆∆
YKL218C	5	4	106.24	0.155312	0.30232	1.43772	WT	∆∆
YKL094W	4	2	72.8	0.155412	0.30232	1.24827	WT	∆∆
YLR147C	3	1	33.43	0.156675	0.304472	1.39043	∆∆	WT
YNL219C	3	3	79.02	0.157327	0.305436	1.43213	∆∆	WT
YNL274C	6	2	105.73	0.157576	0.305615	1.49416	WT	∆∆
YLR262C-A	4	3	106.16	0.158459	0.307025	1.20791	WT	∆∆
YCL011C	8	6	154.94	0.159457	0.308652	1.15997	WT	∆∆
YDR258C	28	21	755.91	0.160191	0.309765	1.39523	∆∆	WT
YKL181W	10	7	308.37	0.160398	0.30986	1.16742	∆∆	WT
YBL051C	4	2	64.09	0.161646	0.311963	1.54632	WT	∆∆
YDR516C	8	6	265.8	0.162403	0.312812	1.17227	WT	∆∆
YBR176W	2	1	15.54	0.162406	0.312812	1.507	WT	∆∆
YHL001W;YKL006W	13	6	659.53	0.162566	0.312812	1.26006	∆∆	WT
YPL239W	7	5	230.4	0.16314	0.313607	1.3513	WT	∆∆
YJR105W	18	14	1095.29	0.164328	0.315581	1.16899	WT	∆∆
YMR031C	22	10	538.06	0.164669	0.315919	1.22829	∆∆	WT
YER021W	14	9	429.85	0.164981	0.315919	1.24526	∆∆	WT
YML012W	5	4	191.53	0.165042	0.315919	2.19326	∆∆	WT
YBR291C	4	1	68.37	0.16515	0.315919	68.2185	∆∆	WT
YOR239W	10	6	204	0.165594	0.316169	1.20844	WT	∆∆
YMR226C	16	12	750.7	0.165604	0.316169	1.08873	WT	∆∆
YDR148C	6	5	234.27	0.165987	0.316466	1.13208	∆∆	WT
YML008C	13	12	691.02	0.166084	0.316466	1.36446	WT	∆∆
YKR074W	4	1	78.18	0.166382	0.316724	2.04744	∆∆	WT
YDL140C	26	20	698.43	0.168093	0.319489	1.09969	∆∆	WT
YDR317W	3	1	30.42	0.168161	0.319489	1.65473	WT	∆∆
YLR287C	6	5	90.32	0.168382	0.3196	1.45013	∆∆	WT
YAL038W	53	42	3354.46	0.168905	0.32028	1.11186	∆∆	WT
YOR260W	4	2	54.89	0.169212	0.320551	1.31182	WT	∆∆
YKL085W	17	14	776.47	0.169588	0.320953	1.28301	∆∆	WT
YDL007W	16	11	487.19	0.169975	0.321375	1.24548	∆∆	WT
YLR457C	3	2	21.56	0.171282	0.323532	1.67355	WT	∆∆
YHR135C	2	2	75.72	0.173677	0.32774	4.66489	WT	∆∆
YOR206W	10	7	172.21	0.174311	0.328619	1.32047	WT	∆∆
YLR163C	3	2	47.02	0.17523	0.330033	2.98689	∆∆	WT
YCR012W	39	32	3130.49	0.175609	0.330189	1.09273	∆∆	WT
YFL048C	5	2	150.56	0.17565	0.330189	1.282	WT	∆∆
YIL136W	5	3	211.17	0.176581	0.331618	2.20929	∆∆	WT
YAL044C	6	5	511.16	0.176835	0.331777	1.12315	WT	∆∆
YGL135W	13	11	729.27	0.177058	0.331877	1.13389	WT	∆∆
YGR286C	6	2	84.71	0.177276	0.331968	1.27571	WT	∆∆
YPR091C	6	5	66.74	0.178442	0.333271	2.21206	∆∆	WT
YGR261C	9	4	80.98	0.178457	0.333271	1.52554	WT	∆∆
YHR008C	10	7	311.43	0.178491	0.333271	1.13758	WT	∆∆
YPL059W	6	5	262.31	0.178653	0.333271	1.23669	WT	∆∆
YBL003C	4	2	153.97	0.178987	0.333574	1.20977	WT	∆∆
YLL008W	12	5	198.04	0.180296	0.335689	1.37464	WT	∆∆
YDL198C	12	7	271.39	0.180498	0.335689	3.24789	∆∆	WT
YKR003W	7	1	49.75	0.180692	0.335689	1.79818	WT	∆∆
YMR250W	5	3	112.11	0.180808	0.335689	2.36738	∆∆	WT
YGL039W	5	4	87.38	0.181028	0.335778	1.21361	WT	∆∆
YPL232W	4	2	61.76	0.182298	0.337713	1.34801	WT	∆∆
YNL265C	4	1	63.65	0.182417	0.337713	2.27293	∆∆	WT
YOL016C	3	1	24.68	0.182792	0.33808	1.2687	∆∆	WT
YKR044W	3	1	30.16	0.183049	0.33808	2.16518	WT	∆∆
YDR033W	3	1	129.48	0.183134	0.33808	1.47471	∆∆	WT
YJL174W	1	1	15.49	0.183374	0.338128	1.33729	WT	∆∆
YML035C	9	5	139.7	0.183505	0.338128	2.8488	∆∆	WT
YMR268C	5	1	35.71	0.184645	0.339907	1.47002	WT	∆∆
YBL091C	8	4	190.16	0.186386	0.342516	1.1252	WT	∆∆
YNL154C	4	3	108.85	0.186413	0.342516	2.29771	WT	∆∆
YDR150W	16	6	196.61	0.187323	0.343865	1.87578	∆∆	WT
YEL031W	22	15	664.68	0.187614	0.344076	1.25068	∆∆	WT
YOR131C	5	2	31.47	0.187826	0.344141	1.38611	WT	∆∆
YJR080C	6	4	82.74	0.188443	0.344776	1.58211	WT	∆∆
YER029C	3	2	36.72	0.188524	0.344776	1.50704	WT	∆∆
YKL214C	1	1	64.91	0.189291	0.345661	1.34738	∆∆	WT
YBL027W	12	10	678.09	0.189392	0.345661	1.19142	∆∆	WT
YGL203C	5	4	45.47	0.189539	0.345661	1.81088	WT	∆∆
YDR285W	11	1	62.07	0.190548	0.346903	1.89633	WT	∆∆
YOR286W	6	2	129.32	0.190575	0.346903	1.30146	∆∆	WT
YGL111W	5	2	78.99	0.191263	0.347833	1.43486	WT	∆∆
YIL041W	16	14	718.55	0.192623	0.349979	1.10782	∆∆	WT
YDR469W	2	1	74.36	0.193012	0.350361	1.88665	WT	∆∆
YOR171C	2	1	60.82	0.195545	0.354629	1.42374	WT	∆∆
YOR173W	3	1	117.15	0.196312	0.355561	1.45381	WT	∆∆
YML130C	6	6	182.16	0.196484	0.355561	2.90792	∆∆	WT
YKL033W-A	7	5	300.95	0.196892	0.355561	1.15882	WT	∆∆
YCL001W	2	2	38.18	0.196959	0.355561	1.68798	WT	∆∆
YJL101C	5	4	69.49	0.196968	0.355561	1.21134	∆∆	WT
YHR069C	5	4	166.39	0.197617	0.356078	1.14055	∆∆	WT
YKR082W	7	3	89.32	0.197619	0.356078	4.50307	∆∆	WT
YPL037C	8	5	297.19	0.198505	0.357346	1.11777	∆∆	WT
YMR261C	16	10	381.43	0.200535	0.360499	1.15612	∆∆	WT
YHR042W	21	14	734.21	0.200626	0.360499	1.37139	WT	∆∆
YIL162W	2	2	28.45	0.201072	0.360765	1.4528	WT	∆∆
YKL164C	4	1	104.09	0.201142	0.360765	2.71793	WT	∆∆
YLR172C	6	2	203.97	0.201361	0.360825	1.09221	WT	∆∆
YOR294W	2	2	93.94	0.201801	0.361149	1.22634	WT	∆∆
YAL012W	14	12	894.85	0.201911	0.361149	1.09955	WT	∆∆
YMR089C	8	1	79.47	0.20298	0.362728	1.49201	WT	∆∆
YCL057W	16	10	489.87	0.203572	0.363456	1.87352	∆∆	WT
YKL018W	1	1	25.04	0.204186	0.364218	2.58703	∆∆	WT
YHR179W	22	18	1119.45	0.204474	0.3644	1.1669	WT	∆∆
YMR024W	4	2	41.7	0.205393	0.36562	1.76478	WT	∆∆
YKL172W	9	5	256.41	0.205592	0.36562	1.59431	WT	∆∆
YPL234C	1	1	30.27	0.20572	0.36562	2.1226	∆∆	WT
YHR108W	6	4	204.83	0.206401	0.366438	1.26501	WT	∆∆
YLR022C	5	2	59.53	0.206555	0.366438	1.26169	WT	∆∆
YGR208W	6	6	217.03	0.206772	0.36649	1.38143	∆∆	WT
YMR278W	10	3	46.63	0.208067	0.368452	1.36107	WT	∆∆
YOR016C	4	1	87.64	0.208611	0.36895	2.15597	WT	∆∆
YKR081C	5	2	149.68	0.208726	0.36895	1.42981	WT	∆∆
YMR170C	7	3	234.44	0.209046	0.3691	1.24527	WT	∆∆
YLR133W	5	3	70.81	0.209254	0.3691	1.56312	WT	∆∆
YPR188C	3	3	67.4	0.209377	0.3691	1.28855	WT	∆∆
YDR100W	1	1	15.05	0.210077	0.369759	5.26785	WT	∆∆
YPR172W	3	2	28.65	0.210129	0.369759	1.52465	WT	∆∆
YKL013C	5	4	123.07	0.210577	0.370214	1.32221	∆∆	WT
YMR314W	11	8	400.76	0.211605	0.371687	1.15022	WT	∆∆
YLR100W	2	1	80.41	0.215595	0.378356	2.53689	∆∆	WT
YNL323W	5	5	73.81	0.21697	0.380141	1.36498	WT	∆∆
YGL242C	6	4	141.37	0.217175	0.380141	1.1474	WT	∆∆
YPL249C	6	2	106.33	0.217196	0.380141	1.28894	WT	∆∆
YDR517W	4	3	60.1	0.218085	0.381072	1.44307	∆∆	WT
YPR052C	4	2	139.92	0.218118	0.381072	1.30541	∆∆	WT
YER009W	3	2	208.33	0.218502	0.381402	1.99856	∆∆	WT
YNL316C	3	2	62.89	0.21891	0.381775	12.3512	∆∆	WT
YOR099W	5	4	168.55	0.219395	0.382279	1.33635	WT	∆∆
YJL130C	114	83	5536.06	0.220171	0.38329	1.09724	WT	∆∆
YJR093C	1	1	34.24	0.22037	0.383294	1.29448	∆∆	WT
YGL228W	12	5	198.62	0.221251	0.384485	1.88008	WT	∆∆
YDR189W	7	1	111.78	0.221495	0.384568	1.52172	WT	∆∆
YGL106W	7	5	303.67	0.221812	0.384763	1.13765	WT	∆∆
YCR093W	16	10	216.51	0.222001	0.384763	1.44464	∆∆	WT
YPR088C	7	3	130.68	0.223579	0.386989	10.3659	∆∆	WT
YDR091C	19	15	647.34	0.223682	0.386989	1.24875	∆∆	WT
YPL170W	5	3	136.89	0.224264	0.387653	1.34356	∆∆	WT
YJR125C	3	3	53.97	0.225683	0.389538	1.32412	∆∆	WT
YPR103W	8	7	272.7	0.225753	0.389538	1.27372	WT	∆∆
YBL055C	2	1	35.25	0.226055	0.38971	1.73731	∆∆	WT
YOR270C	14	10	697.6	0.226251	0.38971	1.44901	WT	∆∆
YEL054C	12	9	771.43	0.227412	0.390879	1.14582	∆∆	WT
YIL062C	4	3	151.05	0.227436	0.390879	1.40448	∆∆	WT
YIL065C	2	1	23.5	0.22753	0.390879	2.1842	WT	∆∆
YLR180W	22	9	1200.74	0.228507	0.392214	1.06471	∆∆	WT
YGL097W	3	3	62.63	0.228827	0.392419	1.22885	WT	∆∆
YOR316C	4	3	112.35	0.229151	0.39263	1.67097	WT	∆∆
YFR021W	3	1	39.02	0.230519	0.394627	1.65476	WT	∆∆
YGL198W	1	1	30.32	0.232719	0.398045	1.43595	∆∆	WT
YJL193W	1	1	16.79	0.234337	0.400114	579.043	∆∆	WT
YMR266W	3	1	73.43	0.23444	0.400114	8.61841	∆∆	WT
YGL041W-A	1	1	15.76	0.234543	0.400114	1.97743	WT	∆∆
YOR226C	4	2	77.61	0.235862	0.402014	1.88238	WT	∆∆
YDL053C	1	1	73.55	0.237298	0.404066	1.77958	WT	∆∆
YFL005W	10	7	350.38	0.237479	0.404066	1.16687	WT	∆∆
YJL115W	3	3	82.69	0.238948	0.405947	1.55614	WT	∆∆
YDL014W	15	11	496.65	0.239	0.405947	1.27808	∆∆	WT
YOR328W	8	2	172.63	0.239298	0.406101	2.45611	WT	∆∆
YIL126W	16	4	121.51	0.240457	0.407713	1.84447	∆∆	WT
YGL187C	3	3	90.3	0.240968	0.408062	1.21273	∆∆	WT
YIL063C	9	5	180.1	0.24108	0.408062	1.20736	WT	∆∆
YNL085W	5	3	117.11	0.242534	0.410168	1.36465	WT	∆∆
YJR137C	49	39	1672.92	0.243077	0.410731	1.13183	WT	∆∆
YKL009W	9	5	300.24	0.24402	0.411484	1.14592	∆∆	WT
YLR048W	13	3	695.8	0.244063	0.411484	1.43376	∆∆	WT
YLR083C	4	4	176.29	0.244154	0.411484	1.37482	WT	∆∆
YKL148C	5	2	116.07	0.244916	0.41231	3.72828	∆∆	WT
YKL100C	4	2	96.69	0.245066	0.41231	12.2215	∆∆	WT
YFL004W	12	7	96.56	0.245687	0.412365	1.31732	WT	∆∆
YIL018W	17	14	786.17	0.245945	0.412365	1.14519	∆∆	WT
YJL069C	5	3	106.1	0.245974	0.412365	1.28244	WT	∆∆
YDR496C	12	7	178.43	0.246114	0.412365	1.18761	WT	∆∆
YOR310C	17	15	630.37	0.246154	0.412365	1.62486	∆∆	WT
YOL092W	2	1	59.08	0.247009	0.413444	Inf	WT	∆∆
YPR058W	7	4	184.47	0.247605	0.413902	3.80826	∆∆	WT
YKL120W	13	9	435.21	0.247719	0.413902	1.31607	WT	∆∆
YDL072C	6	4	149.52	0.247918	0.413902	14.386	∆∆	WT
YDR354W	3	3	56.14	0.248523	0.414343	1.30908	WT	∆∆
YPL206C	2	1	29.04	0.248606	0.414343	1.38904	WT	∆∆
YJR133W	5	3	90.76	0.249365	0.415254	1.20079	∆∆	WT
YGR145W	6	2	100.7	0.251397	0.418206	1.18049	∆∆	WT
YFR028C	2	1	60.63	0.251758	0.418206	1.38484	WT	∆∆
YNL113W	6	5	260.49	0.251909	0.418206	1.12562	WT	∆∆
YGL093W	8	1	68.08	0.251993	0.418206	2.18326	∆∆	WT
YLR438C-A	1	1	15.78	0.254153	0.421432	1.18523	∆∆	WT
YJR068W	8	2	116.78	0.254906	0.422324	1.46787	WT	∆∆
YCL054W	15	7	158.78	0.255512	0.422656	4.25653	∆∆	WT
YDR300C	5	5	176.35	0.255539	0.422656	1.09636	WT	∆∆
YOR335C	52	39	2279.08	0.256401	0.423723	1.06831	WT	∆∆
YDR497C	3	2	66.77	0.257492	0.425167	2.17548	∆∆	WT
YDR097C	14	2	70.06	0.258545	0.426362	2.02784	∆∆	WT
YDL229W	41	2	2866.13	0.258652	0.426362	1.13561	∆∆	WT
YJL123C	10	6	453.1	0.259529	0.426918	1.11779	∆∆	WT
YML101C	1	1	13.77	0.259846	0.426918	2.32681	∆∆	WT
YML086C	11	8	331.59	0.259965	0.426918	1.27821	WT	∆∆
YBR218C	39	11	1606.77	0.260081	0.426918	1.52951	WT	∆∆
YDL121C	2	1	34.01	0.260081	0.426918	2.67455	WT	∆∆
YLR398C	16	5	136.5	0.260925	0.427944	2.93011	∆∆	WT
YDR453C	4	1	71.83	0.261653	0.428422	2.76234	∆∆	WT
YJR007W	19	13	500.25	0.261655	0.428422	1.21897	WT	∆∆
YNR035C	8	8	329.38	0.262661	0.429708	1.12416	∆∆	WT
YGL251C	9	1	37.21	0.263749	0.431128	1.50812	∆∆	WT
YHR003C	5	1	48.46	0.265147	0.433051	1.16868	WT	∆∆
YOR176W	9	5	173.04	0.266129	0.433926	1.19582	∆∆	WT
YGL221C	12	9	393.37	0.266354	0.433926	1.09539	WT	∆∆
YJL082W	6	3	80.31	0.266415	0.433926	1.45389	WT	∆∆
YMR179W	8	1	63.71	0.266719	0.433926	1.30429	∆∆	WT
YDR424C	5	2	76.28	0.266841	0.433926	1.63857	∆∆	WT
YIL034C	6	6	176.15	0.267015	0.433926	1.15617	∆∆	WT
YLR321C	3	2	26.26	0.268003	0.434584	1.82752	∆∆	WT
YGR103W	14	14	381.83	0.268079	0.434584	1.12593	WT	∆∆
YLR118C	3	3	153.62	0.268086	0.434584	1.24709	∆∆	WT
YGL001C	3	2	143.83	0.270249	0.437728	1.37322	∆∆	WT
YNL208W	6	5	357.62	0.270952	0.438503	1.14809	WT	∆∆
YOL006C	9	3	70.2	0.271869	0.439622	1.27078	∆∆	WT
YML048W	10	8	352.07	0.273604	0.442008	1.24103	WT	∆∆
YOR327C	3	2	48.96	0.273796	0.442008	1.26162	∆∆	WT
YDL153C	8	5	180.87	0.274199	0.442293	1.39532	WT	∆∆
YDR399W	14	13	496.73	0.274857	0.442988	1.09142	WT	∆∆
YAL059W	4	1	118	0.275233	0.443229	1.17237	∆∆	WT
YLR342W	36	17	1254.12	0.276637	0.445124	1.10155	WT	∆∆
YHR019C	30	27	1495.68	0.277572	0.446261	1.12414	∆∆	WT
YOR142W	9	6	336.18	0.279007	0.448199	1.23639	∆∆	WT
YHR119W	8	1	83.48	0.28095	0.450951	1.56625	WT	∆∆
YOL031C	5	1	31.73	0.282121	0.452458	1.95368	WT	∆∆
YDR190C	14	11	342.64	0.28294	0.453399	1.14144	WT	∆∆
YNL197C	3	2	33.73	0.283389	0.453748	1.32343	∆∆	WT
YBR234C	14	7	304.42	0.283865	0.454138	1.11836	∆∆	WT
YER134C	4	2	53.22	0.284313	0.454482	8.15435	∆∆	WT
YKL040C	7	7	305.48	0.284626	0.454584	1.1595	WT	∆∆
YNL015W	4	3	191.81	0.284843	0.454584	1.19033	WT	∆∆
YKL077W	4	3	25.07	0.285074	0.454584	1.74833	∆∆	WT
YLR433C	4	3	39.09	0.285455	0.45475	1.33062	∆∆	WT
YCR057C	3	1	77.34	0.285644	0.45475	1.77605	∆∆	WT
YHR030C	4	2	48.19	0.286699	0.456059	1.9005	∆∆	WT
YGR244C	12	9	201.03	0.288001	0.457757	1.25438	WT	∆∆
YPR068C	4	2	34.89	0.288753	0.458579	1.09961	WT	∆∆
YDR363W-A	1	1	60.43	0.289252	0.458999	1.27036	∆∆	WT
YFR050C	4	2	142.4	0.29038	0.460416	1.11971	∆∆	WT
YBR287W	1	1	51.63	0.291776	0.462255	1.27034	WT	∆∆
YGL054C	1	1	71.78	0.292078	0.462359	1.66629	∆∆	WT
YDL235C	8	6	263.13	0.29278	0.462832	1.17893	∆∆	WT
YJR053W	5	3	38.56	0.292851	0.462832	1.10351	WT	∆∆
YGL043W	10	7	305.28	0.295723	0.46697	1.19297	WT	∆∆
YCL017C	7	4	103.28	0.295947	0.46697	1.25987	WT	∆∆
YOR151C	18	12	323.87	0.2965	0.467266	1.21987	WT	∆∆
YJL140W	3	3	104.56	0.296612	0.467266	1.13117	∆∆	WT
YBR244W	6	3	221.56	0.296985	0.467476	1.1583	WT	∆∆
YPL235W	9	6	297.93	0.29795	0.4686	1.11428	WT	∆∆
YIL022W	12	7	320.84	0.298345	0.4686	1.00804	∆∆	WT
YGL252C	10	4	197.06	0.298418	0.4686	1.1581	WT	∆∆
YGL156W	6	4	74.02	0.299578	0.469736	6.89992	∆∆	WT
YIR035C	3	2	60.65	0.299622	0.469736	1.47436	∆∆	WT
YMR205C	34	28	1715.5	0.301357	0.472078	1.11507	∆∆	WT
YOR175C	5	2	71.29	0.301893	0.472538	2.79292	∆∆	WT
YPL178W	5	2	97.66	0.304105	0.47562	1.31932	∆∆	WT
YBR115C	39	30	1255.67	0.304426	0.475742	1.07037	∆∆	WT
YLL013C	6	3	182.14	0.304692	0.475778	1.58726	∆∆	WT
YJR075W	3	1	55.76	0.305299	0.476344	1.42368	WT	∆∆
YDR529C	3	2	121.97	0.307087	0.478752	1.28534	∆∆	WT
YCL030C	48	39	2525.89	0.308578	0.480693	1.07565	WT	∆∆
YNL229C	5	3	97.5	0.309115	0.481146	1.20218	∆∆	WT
YNL330C	2	2	95.51	0.310727	0.483271	1.27048	WT	∆∆
YKL127W	13	11	399.64	0.312226	0.484798	1.54302	∆∆	WT
YPR072W	12	6	145.64	0.31239	0.484798	1.86735	WT	∆∆
YLR175W	16	13	496.38	0.312453	0.484798	1.07545	WT	∆∆
YNL118C	10	4	109.71	0.313825	0.48654	1.28263	WT	∆∆
YHR047C	15	10	441.87	0.314541	0.487264	1.14105	WT	∆∆
YPL145C	12	10	397.35	0.316079	0.48926	1.14189	WT	∆∆
YGR037C	8	6	553.4	0.316448	0.489296	1.05615	∆∆	WT
YKL021C	8	2	121.21	0.316603	0.489296	1.595	∆∆	WT
YDR483W	10	9	290.27	0.317184	0.489806	1.17376	∆∆	WT
YMR291W	6	2	56.95	0.322245	0.496998	49.9165	∆∆	WT
YGL253W	34	25	1761.14	0.32235	0.496998	1.08794	WT	∆∆
YDR119W	2	1	42.22	0.324167	0.499406	1.93126	∆∆	WT
YOL061W	10	8	302.85	0.325025	0.499857	1.10275	WT	∆∆
YMR206W	2	1	19.12	0.325026	0.499857	2.78272	∆∆	WT
YOR321W	4	1	63.52	0.325226	0.499857	16.064	∆∆	WT
YJR017C	6	4	217.52	0.328374	0.504298	1.25199	∆∆	WT
YDR152W	4	3	85.85	0.329451	0.505554	1.07703	WT	∆∆
YGR038W	1	1	21.77	0.330181	0.506278	1.07337	∆∆	WT
YMR015C	4	1	25.34	0.330774	0.50679	1.14264	WT	∆∆
YPR190C	4	2	70.42	0.331332	0.506975	1.1983	WT	∆∆
YMR290C	8	6	231.08	0.331414	0.506975	1.3079	∆∆	WT
YEL046C	15	12	672.81	0.332462	0.50818	1.10187	WT	∆∆
YHR132W-A	5	3	53.81	0.335362	0.512213	1.24937	∆∆	WT
YBR006W	8	5	116.16	0.336371	0.513353	1.15009	WT	∆∆
YIL118W	4	4	167.28	0.337038	0.51397	1.23762	WT	∆∆
YGR281W	19	6	94.12	0.33951	0.516941	1.13569	∆∆	WT
YBR034C	6	3	105.09	0.339515	0.516941	1.13802	∆∆	WT
YDL083C	11	8	559.21	0.339911	0.517141	1.18349	∆∆	WT
YJR057W	3	1	34.98	0.341136	0.518601	1.32577	WT	∆∆
YJL145W	10	7	133.02	0.342776	0.520689	1.10783	WT	∆∆
YGR128C	9	5	244.9	0.343583	0.521509	1.37275	∆∆	WT
YGL014W	4	2	38.31	0.344241	0.522104	1.2776	WT	∆∆
YGL207W	24	16	747.77	0.344683	0.522368	1.12454	∆∆	WT
YKL008C	2	1	44.58	0.345259	0.522836	1.92037	∆∆	WT
YHR026W	1	1	41.33	0.345632	0.522937	1.46331	WT	∆∆
YAR002W	6	5	102.24	0.345861	0.522937	1.1512	WT	∆∆
YIL088C	3	1	59.96	0.346593	0.523236	Inf	WT	∆∆
YMR047C	2	1	57.56	0.346593	0.523236	Inf	WT	∆∆
YHR141C	5	3	148.02	0.347337	0.523751	5.84963	∆∆	WT
YLR222C	6	4	76.89	0.347504	0.523751	1.51909	∆∆	WT
YDR525W-A	1	1	49.46	0.347938	0.523751	3.86818	WT	∆∆
YKL046C	1	1	15.37	0.348006	0.523751	1.01047	WT	∆∆
YBR029C	4	1	89.57	0.348822	0.524575	1.17953	WT	∆∆
YDL099W	5	1	46.14	0.349549	0.525263	1.24619	WT	∆∆
YDR214W	15	12	444.56	0.349954	0.525468	1.09653	WT	∆∆
YLR044C	42	32	3404.59	0.352529	0.52893	1.0875	∆∆	WT
YHR098C	7	5	180.64	0.352931	0.52898	1.23612	∆∆	WT
YML096W	2	1	20.82	0.35327	0.52898	12.7918	WT	∆∆
YLR380W	7	6	224.61	0.353573	0.52898	1.1971	WT	∆∆
YML069W	14	8	385.7	0.353667	0.52898	1.25924	∆∆	WT
YMR298W	2	1	24.94	0.353916	0.52898	612.097	∆∆	WT
YMR297W	9	8	234.29	0.354664	0.529425	1.21749	∆∆	WT
YBR086C	6	2	116.28	0.354755	0.529425	3.75596	WT	∆∆
YPL171C	3	1	40.53	0.355294	0.529824	2.05581	WT	∆∆
YGR211W	15	10	526.77	0.355875	0.530286	1.21534	∆∆	WT
YOR341W	28	17	766.91	0.35637	0.530619	1.13556	∆∆	WT
YML034W	6	2	60.73	0.356739	0.530765	1.35376	WT	∆∆
YKR046C	5	1	148.63	0.359241	0.53408	1.19572	∆∆	WT
YPR041W	17	12	597.84	0.359712	0.534227	1.51554	∆∆	WT
YDL081C	2	1	196.8	0.359947	0.534227	1.94444	∆∆	WT
YJL014W	17	13	499.21	0.360159	0.534227	1.16736	∆∆	WT
YGL246C	3	2	135.56	0.361312	0.535531	1.35545	WT	∆∆
YDL084W	25	19	1027.3	0.361763	0.535793	1.06768	WT	∆∆
YBR017C	3	1	107.06	0.362671	0.536731	1.1603	∆∆	WT
YPL210C	12	8	379.07	0.36517	0.539734	1.32232	∆∆	WT
YJL001W	11	7	398.92	0.365252	0.539734	1.61834	∆∆	WT
YMR011W	3	2	61.19	0.365557	0.539776	1.26768	WT	∆∆
YPL126W	5	2	57.96	0.367252	0.54187	1.11132	WT	∆∆
YHR060W	5	2	87.48	0.367882	0.542011	1.09962	∆∆	WT
YBR170C	9	3	79.31	0.367902	0.542011	1.3247	∆∆	WT
YCL008C	2	2	26.23	0.369511	0.543576	1.32463	WT	∆∆
YDR098C;YER174C	7	6	207.44	0.369713	0.543576	1.11222	∆∆	WT
YDR429C	10	8	427.81	0.369799	0.543576	1.11511	∆∆	WT
YJR042W	5	1	60.55	0.371419	0.545548	2.82679	∆∆	WT
YBR286W	13	10	471.37	0.372113	0.546157	1.06723	WT	∆∆
YGL245W	47	33	1934.2	0.373018	0.547075	1.0345	WT	∆∆
YJL189W	2	2	90.8	0.376476	0.551733	1.14673	∆∆	WT
YLL062C	4	3	82.17	0.37794	0.553463	1.27905	WT	∆∆
YNL192W	2	1	38.16	0.379305	0.555046	4.90311	WT	∆∆
YBR078W	3	3	205.66	0.380721	0.556701	1.00021	∆∆	WT
YGR008C	4	2	87.63	0.382063	0.55801	1.44017	WT	∆∆
YKL152C	19	16	1026.12	0.382187	0.55801	1.06163	WT	∆∆
YJL124C	4	3	32.44	0.382978	0.558749	1.03148	∆∆	WT
YHR065C	7	3	152.56	0.384005	0.559829	1.59418	∆∆	WT
YIL155C	8	4	134.86	0.386289	0.562389	2.00248	∆∆	WT
YJL184W	5	4	137.92	0.386337	0.562389	1.16773	WT	∆∆
YNL166C	7	5	194.26	0.388848	0.565595	1.11723	WT	∆∆
YJL122W	3	1	75.85	0.389118	0.565595	1.0648	WT	∆∆
YMR074C	2	2	116.89	0.390068	0.566555	1.14227	WT	∆∆
YPR180W	2	2	39.8	0.390919	0.567369	1.24367	WT	∆∆
YGR253C	9	8	360.87	0.392195	0.568799	1.11526	WT	∆∆
YDL004W	2	1	20.83	0.393763	0.57065	1.14717	WT	∆∆
YOR020W-A	2	2	63.89	0.39497	0.571736	1.2482	WT	∆∆
YGR231C	4	3	176.35	0.395097	0.571736	2.65186	WT	∆∆
YJL052W	29	14	1429.99	0.395876	0.572439	1.05852	WT	∆∆
YMR208W	7	5	266.14	0.397719	0.574679	1.3637	WT	∆∆
YGR019W	15	14	273.55	0.398083	0.574779	2.02059	∆∆	WT
YER007C-A	6	4	204.41	0.39913	0.575866	1.13561	∆∆	WT
YNL183C	6	3	58.97	0.400471	0.577375	1.26235	WT	∆∆
YJL050W	10	4	225.1	0.401278	0.578113	3.45101	∆∆	WT
YJL002C	6	6	143.69	0.402156	0.578951	1.17055	∆∆	WT
YHR196W	2	1	131.5	0.402457	0.578957	1.16195	WT	∆∆
YGR185C	21	14	804.06	0.403086	0.579436	1.07842	WT	∆∆
YDR322C-A	3	1	23.25	0.404331	0.580798	1.17599	∆∆	WT
YOR196C	2	1	36.27	0.407223	0.584523	2.19265	WT	∆∆
YLR181C	4	1	31.75	0.408982	0.586618	1.16611	∆∆	WT
YER056C	3	3	191.55	0.409702	0.587219	1.08709	∆∆	WT
YBR015C	7	1	114.31	0.410358	0.587728	1.29599	∆∆	WT
YGL244W	7	4	98.74	0.41117	0.588461	1.09793	WT	∆∆
YMR049C	7	7	272.24	0.411837	0.588985	1.08279	∆∆	WT
YCL059C	8	5	136.02	0.414952	0.593005	1.10889	WT	∆∆
YGL049C	10	3	213.55	0.415269	0.593025	1.49461	∆∆	WT
YJL183W	5	4	63.14	0.41586	0.593436	1.1369	WT	∆∆
YLR150W	14	11	753.21	0.417543	0.595278	1.08943	WT	∆∆
YGL077C	1	1	63.09	0.41776	0.595278	8.14883	WT	∆∆
YDR511W	2	1	21.66	0.419654	0.59754	2.23461	∆∆	WT
YDL190C	10	4	124.58	0.420799	0.598735	1.47974	∆∆	WT
YGR087C	9	2	746.01	0.421579	0.599408	1.7539	∆∆	WT
YOR207C	16	7	194.54	0.422565	0.600374	1.90576	∆∆	WT
YLR059C	2	1	105.91	0.423405	0.600934	1.35347	WT	∆∆
YHR063C	12	8	412.17	0.423574	0.600934	1.08788	WT	∆∆
YDL147W	14	6	327.88	0.425169	0.601086	1.10013	WT	∆∆
YML074C	4	3	148.53	0.425228	0.601086	1.06918	∆∆	WT
YMR058W	6	6	109.87	0.425397	0.601086	1.12633	WT	∆∆
YMR296C	4	3	133.02	0.42554	0.601086	1.42129	WT	∆∆
YGR135W	10	7	489.72	0.42617	0.601086	1.09053	WT	∆∆
YGL129C	5	1	24.52	0.426551	0.601086	1.19401	WT	∆∆
YGR181W	3	3	210.91	0.426635	0.601086	1.10441	WT	∆∆
YHR137W	2	2	56.21	0.426678	0.601086	1.16978	WT	∆∆
YEL040W	3	3	28.61	0.426952	0.601086	1.96126	∆∆	WT
YGL062W	37	9	1609.95	0.42712	0.601086	1.14964	∆∆	WT
YNL010W	11	9	415.31	0.427158	0.601086	1.07372	WT	∆∆
YPL217C	10	6	134.53	0.427371	0.601086	5.51572	∆∆	WT
YKL117W	5	5	288.17	0.428531	0.60192	1.06858	WT	∆∆
YBR283C	5	4	56.78	0.42858	0.60192	1.49636	WT	∆∆
YJL041W	20	17	381.3	0.429382	0.602615	1.05683	WT	∆∆
YNL175C	9	8	148.35	0.432541	0.606612	1.2188	WT	∆∆
YGL087C	3	2	106.85	0.433196	0.607095	1.23509	∆∆	WT
YML056C	15	3	938.2	0.433704	0.607373	1.25013	∆∆	WT
YPL009C	11	5	146.23	0.434626	0.608041	1.15061	∆∆	WT
YBR077C	1	1	49.2	0.434863	0.608041	1.09244	WT	∆∆
YBR273C	6	2	50.74	0.435115	0.608041	1.14661	∆∆	WT
YGL055W	9	6	265.69	0.436709	0.609833	1.19957	∆∆	WT
YMR269W	3	2	108.59	0.437704	0.610786	1.35035	∆∆	WT
YJR014W	4	2	116.98	0.438613	0.611196	1.10184	WT	∆∆
YOR281C	4	2	150.96	0.438623	0.611196	1.17824	∆∆	WT
YER057C	7	5	275.4	0.439471	0.611942	1.12062	WT	∆∆
YDR168W	19	12	364.92	0.441508	0.613955	1.13678	WT	∆∆
YKL192C	2	2	85.11	0.441545	0.613955	1.08708	WT	∆∆
YKL056C	11	10	639.96	0.442739	0.615178	1.08405	WT	∆∆
YGL068W	7	1	100.55	0.443665	0.616026	1.11739	∆∆	WT
YGR081C	3	2	31.57	0.444531	0.61679	1.08655	WT	∆∆
YPL169C	4	1	62.92	0.446718	0.619386	2.19254	WT	∆∆
YKL165C	3	3	40.94	0.44851	0.621142	1.18409	WT	∆∆
YOR323C	19	14	706.46	0.44862	0.621142	1.04709	WT	∆∆
YOR241W	6	1	59.4	0.449421	0.621811	1.31831	WT	∆∆
YML026C	19	14	737.26	0.449829	0.621935	1.08521	∆∆	WT
YFL059W	9	1	201.54	0.450541	0.622479	1.17579	WT	∆∆
YGL078C	14	11	306.24	0.452017	0.623761	1.06144	WT	∆∆
YBR151W	3	2	84.02	0.452107	0.623761	1.07817	WT	∆∆
YDR457W	27	11	299.53	0.45349	0.625228	1.10503	WT	∆∆
YGL092W	10	5	119.17	0.454161	0.625712	1.38704	∆∆	WT
YLR250W	4	4	123.42	0.454692	0.626002	1.10961	WT	∆∆
YGL065C	5	3	184.24	0.458589	0.630924	5.96335	∆∆	WT
YLR043C	11	6	533.47	0.459459	0.631572	1.10519	WT	∆∆
YPR163C	26	24	876.8	0.459773	0.631572	1.09647	WT	∆∆
YGL232W	10	5	252.84	0.46003	0.631572	1.08599	WT	∆∆
YDR099W	18	3	1123.16	0.460418	0.631661	1.09011	WT	∆∆
YDR513W	6	5	181.91	0.460832	0.631785	1.08559	WT	∆∆
YGR132C	8	4	146.62	0.461426	0.632157	2.48784	∆∆	WT
YER003C	14	12	593.25	0.463995	0.635082	1.04534	∆∆	WT
YDR331W	1	1	19.15	0.464211	0.635082	1.2842	∆∆	WT
YBR096W	3	2	79.25	0.464962	0.635665	1.10544	WT	∆∆
YJL136C	8	1	578.19	0.466097	0.636772	1.07608	∆∆	WT
YCL057C-A	3	2	76.92	0.467139	0.637378	2.38759	WT	∆∆
R0040C	3	2	98.06	0.467193	0.637378	1.02255	WT	∆∆
YOR103C	3	3	150.4	0.468664	0.638939	1.9625	∆∆	WT
YMR079W	15	14	559.4	0.470495	0.640725	1.0754	WT	∆∆
YMR285C	3	1	29.4	0.470866	0.640725	1.09486	∆∆	WT
YGL181W	3	1	62.96	0.470958	0.640725	1.60243	∆∆	WT
YLR448W	16	2	718.97	0.471618	0.641178	1.03621	WT	∆∆
YHR205W	4	1	30.39	0.472946	0.642537	1.28582	∆∆	WT
YGR054W	14	12	374.35	0.474289	0.643319	1.06447	WT	∆∆
YPL240C	46	6	3119.81	0.474677	0.643319	1.21077	∆∆	WT
YGR034W	13	2	600.3	0.474695	0.643319	1.31227	∆∆	WT
YJR063W	3	2	122.55	0.474864	0.643319	1.01067	∆∆	WT
YDR232W	6	5	126.79	0.475168	0.643319	1.15755	∆∆	WT
YLR231C	7	6	128.05	0.475706	0.643603	1.06133	WT	∆∆
YNR052C	2	1	71.13	0.476954	0.644845	1.05013	∆∆	WT
YNR001C	12	10	667.4	0.477289	0.644851	1.0641	WT	∆∆
YDR135C	11	4	177.36	0.477849	0.645074	1.10099	WT	∆∆
YOL111C	2	2	52.48	0.478157	0.645074	1.07771	∆∆	WT
YDL188C	8	7	215.66	0.478444	0.645074	1.16019	∆∆	WT
YPR133C	9	5	227.05	0.479188	0.645633	3.22015	∆∆	WT
YDR070C	2	2	22.44	0.479739	0.64593	3.19289	∆∆	WT
YBR221C	9	8	450.65	0.481776	0.647808	1.07796	WT	∆∆
YKL016C	4	4	163.46	0.481797	0.647808	1.26648	WT	∆∆
YNL173C	6	3	135.49	0.482672	0.648538	1.16337	WT	∆∆
YLR314C	15	8	564.09	0.484161	0.650092	1.48438	∆∆	WT
YJL020C	14	10	266.12	0.484519	0.650127	1.42743	∆∆	WT
YPL012W	12	9	290.47	0.485487	0.650978	1.10135	WT	∆∆
YGR095C	3	1	54.51	0.486333	0.651213	1.13226	∆∆	WT
YER112W	5	3	126.96	0.486642	0.651213	1.07191	WT	∆∆
YOR061W	8	7	168.42	0.486661	0.651213	1.12069	∆∆	WT
YNL275W	4	2	32.53	0.487156	0.65143	1.9239	WT	∆∆
YJR065C	19	15	506.18	0.487937	0.652027	1.07539	∆∆	WT
YNL200C	4	3	113.69	0.489399	0.653535	1.00945	WT	∆∆
YKL190W	3	2	55.56	0.490362	0.654374	1.14366	∆∆	WT
YDR378C	4	4	179.32	0.49208	0.656219	1.0727	∆∆	WT
YDR321W	8	8	286.89	0.493524	0.657695	1.07431	WT	∆∆
YNL129W	3	1	79.48	0.495218	0.659504	1.20716	WT	∆∆
YOR211C	11	3	76.11	0.497905	0.662631	1.19188	∆∆	WT
YAR002C-A	2	2	34.4	0.499589	0.66442	1.07627	WT	∆∆
YDL174C	6	4	119.16	0.500801	0.665172	3.13706	∆∆	WT
YJL177W	12	1	844.62	0.500835	0.665172	1.12233	∆∆	WT
YGR159C	14	14	640.5	0.501842	0.665961	1.04134	WT	∆∆
YGR148C	10	3	486.41	0.502111	0.665961	1.10215	WT	∆∆
YLR029C;YMR121C	12	9	653.5	0.503072	0.666366	1.08597	WT	∆∆
YJL179W	7	4	84.94	0.503098	0.666366	1.12513	∆∆	WT
YOR280C	3	2	108.72	0.504268	0.667464	1.0217	WT	∆∆
YGL016W	5	1	39.38	0.504628	0.667484	1.09952	∆∆	WT
YML110C	6	4	64.83	0.504966	0.667484	1.71717	∆∆	WT
YLL045C	23	4	1490.31	0.505649	0.667935	1.07658	∆∆	WT
YLR452C	9	4	80.95	0.507547	0.66999	1.37865	∆∆	WT
YPL020C	10	2	71.8	0.508409	0.670675	1.0129	WT	∆∆
YLR441C	28	4	1218.77	0.509105	0.67114	1.13593	∆∆	WT
YGR207C	13	10	390.55	0.510418	0.672374	1.13292	WT	∆∆
YGL031C	11	3	509.47	0.510729	0.672374	1.17728	∆∆	WT
YLR038C	1	1	22.54	0.511738	0.673249	1.0449	WT	∆∆
YIL078W	38	33	1794.23	0.512427	0.673609	1.03149	∆∆	WT
YGR193C	9	3	126.06	0.512888	0.673609	1.13449	WT	∆∆
YNR067C	4	3	98.99	0.513045	0.673609	1.23787	WT	∆∆
YHR174W	50	27	3951.49	0.513469	0.673712	1.06502	∆∆	WT
YGL105W	14	13	658.42	0.514413	0.674499	1.12756	∆∆	WT
YMR158W	3	2	30.72	0.515579	0.675148	1.20235	∆∆	WT
YGR005C	4	1	50.18	0.516689	0.675148	1.89392	∆∆	WT
YDL208W	4	3	86.03	0.516715	0.675148	1.92257	∆∆	WT
YNL007C	15	12	608.97	0.516769	0.675148	1.0578	WT	∆∆
YDL110C	6	4	283.48	0.516866	0.675148	1.17178	∆∆	WT
YKR018C	13	9	310.44	0.51698	0.675148	1.04098	WT	∆∆
YGR229C	6	3	88.42	0.51849	0.676667	1.18613	WT	∆∆
YHR087W	5	4	309.93	0.519105	0.677019	1.06519	WT	∆∆
YOR048C	5	2	38.21	0.519668	0.677068	1.10572	WT	∆∆
YEL038W	3	2	90.8	0.520025	0.677068	1.13418	WT	∆∆
YNL070W	1	1	71.54	0.520605	0.677068	1.16394	WT	∆∆
YNR053C	11	5	211.82	0.521021	0.677068	1.08527	WT	∆∆
YIL038C	9	2	76.5	0.521214	0.677068	1.2822	WT	∆∆
YDR025W	12	10	573.82	0.521221	0.677068	1.04783	∆∆	WT
YAL007C	4	1	37.28	0.522228	0.677925	1.21823	∆∆	WT
YCR052W	5	2	33.83	0.523093	0.678322	1.08387	WT	∆∆
YDR382W	9	9	713.43	0.523228	0.678322	1.1006	∆∆	WT
YHR192W	1	1	25.2	0.524633	0.679693	1.04379	∆∆	WT
YMR093W	4	4	56.51	0.525289	0.679883	4.20983	∆∆	WT
YNR015W	5	1	59.37	0.525475	0.679883	1.19858	∆∆	WT
YGR175C	7	1	102.32	0.53086	0.686397	8.16997	WT	∆∆
YGR192C	37	11	2437.19	0.531272	0.686476	1.07892	∆∆	WT
YAL060W	6	4	115.45	0.534486	0.690172	1.15005	WT	∆∆
YCR005C	9	8	280.3	0.535219	0.690663	1.041	∆∆	WT
YBR085W	6	1	86.41	0.53779	0.693523	1.88207	∆∆	WT
YKL195W	4	2	41.28	0.538607	0.694118	1.70502	∆∆	WT
YML004C	9	5	193.94	0.540118	0.695537	1.03774	WT	∆∆
YDR213W	9	3	45.13	0.54042	0.695537	9.8104	∆∆	WT
YGR020C	6	5	162.76	0.54303	0.698237	1.05397	WT	∆∆
YER089C	10	6	346.13	0.543232	0.698237	1.05749	WT	∆∆
YMR197C	4	2	146.38	0.544524	0.699438	1.50578	∆∆	WT
YFL039C	37	34	1830.53	0.54507	0.699642	1.04976	WT	∆∆
YKL207W	2	1	80.33	0.545399	0.699642	1.15877	∆∆	WT
YKL145W	14	9	388.26	0.546804	0.700708	1.04243	∆∆	WT
YKR096W	3	2	19.78	0.546946	0.700708	1.0592	∆∆	WT
YKL027W	4	3	45.56	0.548922	0.702325	1.03994	∆∆	WT
YNL216W	7	5	130.2	0.548927	0.702325	1.21233	∆∆	WT
YJL148W	2	1	48.49	0.550028	0.702817	1.17303	WT	∆∆
YBR041W	6	2	37.56	0.550042	0.702817	1.00876	∆∆	WT
YDR406W	8	2	123.95	0.55039	0.702817	1.0686	WT	∆∆
YER001W	2	1	30.55	0.552092	0.704372	1.22999	WT	∆∆
YPL262W	17	12	622.37	0.552329	0.704372	1.05671	∆∆	WT
YEL020W-A	3	3	131.78	0.553737	0.70546	1.14362	∆∆	WT
YGL115W	8	6	194.43	0.553941	0.70546	1.1161	∆∆	WT
YNL132W	17	13	394.41	0.554264	0.70546	1.18032	∆∆	WT
YMR027W	18	10	518.66	0.555146	0.706122	1.21321	∆∆	WT
YBR126W-A	3	1	23.65	0.558993	0.710554	1.42972	WT	∆∆
YDR289C	7	2	121.32	0.561492	0.713176	1.05497	WT	∆∆
YPR004C	13	9	307.17	0.561987	0.713176	1.05643	∆∆	WT
YLR340W	18	15	815.89	0.562151	0.713176	1.17935	∆∆	WT
YIR008C	6	2	55.14	0.563444	0.714354	10.6874	∆∆	WT
YDL120W	2	2	114.38	0.563917	0.714489	1.22557	∆∆	WT
YBR031W	19	2	1358.81	0.564427	0.714673	1.96151	∆∆	WT
YER063W	6	3	228.81	0.565134	0.715105	1.05173	WT	∆∆
YGR078C	4	1	94.1	0.569358	0.719984	1.51429	∆∆	WT
YBR106W	6	4	129.74	0.570609	0.7211	1.04934	∆∆	WT
YNR051C	6	3	31.35	0.571245	0.721436	1.06875	∆∆	WT
YCR087C-A	5	3	90.02	0.572093	0.721761	1.68035	∆∆	WT
YDL015C	5	2	68.45	0.57224	0.721761	1.30657	∆∆	WT
YPL139C	3	1	56.49	0.573156	0.72245	3.72606	∆∆	WT
YOL094C	7	5	78.42	0.575452	0.724877	1.72694	∆∆	WT
YGR187C	3	1	90.03	0.577129	0.726521	1.3943	∆∆	WT
YGL202W	23	20	1393.69	0.578181	0.727107	1.034	WT	∆∆
YPR010C	29	22	979.11	0.578521	0.727107	1.06472	∆∆	WT
YKL103C	11	9	347.45	0.578967	0.727107	1.04551	WT	∆∆
YIL016W	1	1	24.81	0.579082	0.727107	1.58681	∆∆	WT
YMR002W	1	1	39.5	0.580848	0.72869	1.15966	∆∆	WT
YHR190W	9	7	301.78	0.581088	0.72869	1.02487	WT	∆∆
YPR034W	6	1	73.37	0.582048	0.729217	10.2927	∆∆	WT
YNL271C	17	2	98.73	0.582406	0.729217	1.0314	∆∆	WT
YJL171C	3	3	71.06	0.582628	0.729217	6.13743	∆∆	WT
YIL008W	1	1	79.83	0.584089	0.730578	1.34745	∆∆	WT
YDR341C	38	28	1323.06	0.585266	0.731583	1.19892	∆∆	WT
YLR032W	3	1	43.83	0.585997	0.732028	1.98271	WT	∆∆
YOR290C	11	3	67.05	0.587327	0.732989	1.54956	∆∆	WT
YJR045C	37	18	1830.01	0.587516	0.732989	1.07618	∆∆	WT
YPR040W	4	3	31.69	0.590847	0.735146	1.05994	WT	∆∆
YHR122W	3	2	118.54	0.590933	0.735146	1.08546	∆∆	WT
YHR051W	4	4	208.7	0.590968	0.735146	1.15622	WT	∆∆
YGL112C	4	2	67.17	0.591095	0.735146	1.62851	∆∆	WT
YGR285C	22	18	857.05	0.591125	0.735146	1.04029	WT	∆∆
YBR248C	27	20	1152.46	0.59396	0.738202	1.02592	WT	∆∆
YMR009W	2	2	105.28	0.596339	0.740437	1.961	∆∆	WT
YJR143C	4	4	107.78	0.596761	0.740437	1.2322	∆∆	WT
YHR053C	1	1	65.38	0.596938	0.740437	1.24907	WT	∆∆
YOR317W	27	20	823.98	0.598004	0.740437	1.03772	WT	∆∆
YEL013W	9	5	241.68	0.598057	0.740437	1.22942	∆∆	WT
YDR071C	10	9	543.75	0.598336	0.740437	1.04777	WT	∆∆
YPR148C	9	8	258.38	0.598462	0.740437	1.00957	WT	∆∆
YPR159W	6	5	216.04	0.598788	0.740437	1.23706	∆∆	WT
YBR003W	4	1	24.46	0.600625	0.742085	1.39183	∆∆	WT
YLR332W	1	1	59.26	0.60088	0.742085	1.89604	WT	∆∆
YMR110C	4	2	31.16	0.601555	0.74245	1.46622	∆∆	WT
YLL023C	1	1	46.95	0.60306	0.743838	2.33439	∆∆	WT
YGL223C	2	2	25.8	0.604707	0.745036	1.29043	WT	∆∆
YOR362C	9	8	252.13	0.604794	0.745036	1.05267	WT	∆∆
YNL231C	12	7	268.91	0.605397	0.745309	1.03742	WT	∆∆
YPL090C	17	14	895.03	0.606511	0.746211	1.05586	∆∆	WT
YHR007C	7	5	207.92	0.607097	0.746462	1.2002	∆∆	WT
YKL073W	6	3	111.64	0.608155	0.747293	1.23917	WT	∆∆
YER017C	3	1	36.6	0.608716	0.747512	1.00597	∆∆	WT
YHL038C	2	2	18.3	0.612907	0.751875	1.07551	WT	∆∆
YOR182C	2	2	132	0.613544	0.751875	1.18757	∆∆	WT
YBL098W	5	1	44.51	0.613676	0.751875	1.15552	WT	∆∆
YML036W	6	3	184.16	0.613807	0.751875	1.06291	WT	∆∆
YFR037C	14	5	401.89	0.616305	0.754463	1.15863	∆∆	WT
YHL007C	7	1	57.19	0.616838	0.754576	1.35357	WT	∆∆
YDL025C	5	1	91.58	0.617903	0.754576	1.44454	WT	∆∆
YDL109C	4	2	27.78	0.61793	0.754576	1.34627	WT	∆∆
YMR145C	10	4	132.62	0.617942	0.754576	8.48101	∆∆	WT
YPR073C	3	2	47.82	0.620464	0.757183	1.34067	∆∆	WT
YDR068W	7	3	114.59	0.621416	0.757871	1.0075	∆∆	WT
YDR519W	8	5	262.31	0.622605	0.758849	1.15871	∆∆	WT
YDL031W	11	4	96.66	0.623988	0.760061	1.29641	∆∆	WT
YGL197W	12	1	113.4	0.624705	0.76028	1.06753	∆∆	WT
YGR074W	2	2	55.57	0.624946	0.76028	1.11499	WT	∆∆
YKR025W	3	3	82.2	0.626793	0.762021	1.26195	∆∆	WT
YDL148C	9	3	136.84	0.62718	0.762021	1.1375	WT	∆∆
YFR016C	12	5	151.36	0.627853	0.762021	1.06088	WT	∆∆
YOL038W	8	6	282.21	0.627936	0.762021	1.03998	WT	∆∆
YOR126C	2	2	30.04	0.629463	0.7634	1.35181	WT	∆∆
YPR086W	6	1	86.54	0.630391	0.764051	1.03222	WT	∆∆
YCR031C	11	10	659.14	0.632307	0.765553	1.03729	WT	∆∆
YJR072C	6	4	124.26	0.632414	0.765553	1.04454	WT	∆∆
YNL267W	5	1	69.73	0.633047	0.765845	5.3983	∆∆	WT
YDR144C	3	2	32.36	0.63396	0.766476	1.04242	WT	∆∆
YLL034C	9	6	68.36	0.63512	0.766908	1.08936	WT	∆∆
YOR185C	11	8	474.55	0.635463	0.766908	1.03053	WT	∆∆
YBR080C	15	8	253.8	0.635926	0.766908	1.04125	WT	∆∆
YOR340C	3	2	74.15	0.636704	0.766908	1.06672	∆∆	WT
YDR454C	11	6	588.61	0.636877	0.766908	1.0417	∆∆	WT
YBR056W	7	3	167.73	0.637028	0.766908	1.10701	∆∆	WT
YLR449W	4	2	97.31	0.637063	0.766908	1.23825	∆∆	WT
YPL199C	3	2	59.5	0.63886	0.768598	5.42066	∆∆	WT
YIL051C	6	6	384.31	0.639313	0.76867	1.30706	∆∆	WT
YDL108W	4	1	57.73	0.642499	0.771598	1.01711	∆∆	WT
YGL027C	10	6	192.34	0.642538	0.771598	1.03841	WT	∆∆
YNL157W	4	2	66.81	0.643047	0.771736	1.09408	∆∆	WT
YLR364W	3	3	59.95	0.643814	0.772117	2.80283	∆∆	WT
YPR043W	6	6	382.98	0.644155	0.772117	1.04257	∆∆	WT
YNL246W	1	1	29.79	0.644557	0.772126	1.19503	WT	∆∆
YPR149W	2	1	54.9	0.646348	0.773797	7.38906	∆∆	WT
YOR089C	4	3	127.91	0.649427	0.777007	1.10779	∆∆	WT
YPL050C	7	2	139.18	0.650679	0.778028	1.07075	∆∆	WT
YLR028C	23	13	1082.24	0.651347	0.778313	1.02902	WT	∆∆
YER125W	15	13	405.73	0.652345	0.778313	1.04078	WT	∆∆
YOR095C	7	5	266.21	0.65241	0.778313	1.04099	WT	∆∆
YBL022C	9	7	150.68	0.652593	0.778313	1.10024	∆∆	WT
YLR389C	9	5	145.08	0.652907	0.778313	1.04669	∆∆	WT
YGR195W	3	2	44.49	0.654462	0.779691	1.49545	∆∆	WT
YHR005C	5	2	96.27	0.658734	0.784303	1.98653	∆∆	WT
YER031C	7	4	355.55	0.664003	0.790094	1.11624	∆∆	WT
YMR183C	5	3	145.43	0.666193	0.792219	1.72149	∆∆	WT
YBL026W	2	2	116.14	0.666894	0.792569	1.94747	∆∆	WT
YGR086C	16	11	1004.76	0.667554	0.792873	1.02341	∆∆	WT
YNL248C	12	6	194.96	0.669042	0.794158	1.06191	∆∆	WT
YLL011W	9	2	147.33	0.669614	0.794354	1.90332	∆∆	WT
YNL035C	2	1	29.54	0.673071	0.797971	1.06267	∆∆	WT
YLL009C	1	1	51.4	0.673934	0.79851	1.34177	∆∆	WT
YER110C	29	26	1534.23	0.677042	0.801422	1.03631	∆∆	WT
YOL127W	11	9	396.74	0.677596	0.801422	1.03681	WT	∆∆
YIR006C	12	7	334.1	0.677622	0.801422	2.25286	∆∆	WT
YBR164C	4	3	105.75	0.683956	0.808425	1.04947	WT	∆∆
YDR476C	2	2	87.9	0.685825	0.809837	1.00375	WT	∆∆
YLR060W	24	17	809.84	0.68598	0.809837	1.02785	∆∆	WT
YLR421C	4	4	86.62	0.686717	0.809932	1.0522	∆∆	WT
YMR307W	8	8	529.44	0.686888	0.809932	1.24636	∆∆	WT
YBR111C	6	6	183.62	0.68916	0.812121	1.04039	WT	∆∆
YAL023C	10	7	342.29	0.691321	0.814176	1.00577	WT	∆∆
YDL135C	5	5	181.69	0.693596	0.815655	1.05254	∆∆	WT
YNL290W	2	2	101.28	0.693612	0.815655	1.21263	WT	∆∆
YOR168W	40	28	1444.23	0.694077	0.815655	1.02549	WT	∆∆
YBR035C	13	11	514.26	0.694246	0.815655	1.03624	WT	∆∆
YHR052W	7	3	217.83	0.695278	0.815815	1.06855	∆∆	WT
YIL027C	4	3	91.46	0.695357	0.815815	2.40624	∆∆	WT
YHR028C	5	1	41.85	0.695633	0.815815	1.83247	WT	∆∆
YFR032C-A	2	1	19.88	0.696748	0.816452	46.1057	∆∆	WT
YGL231C	1	1	21.21	0.69706	0.816452	16.146	∆∆	WT
YHR076W	6	3	71.52	0.697533	0.816452	1.50558	∆∆	WT
YEL002C	6	6	212.74	0.697847	0.816452	1.0796	WT	∆∆
YPL135W	3	1	81.25	0.698766	0.817038	1.27993	∆∆	WT
YOR210W	4	3	102.14	0.700067	0.81807	1.23883	∆∆	WT
YKR048C	10	10	612.4	0.701918	0.819743	1.08647	∆∆	WT
YJL158C	3	1	141.52	0.702789	0.819918	1.51641	∆∆	WT
YKL058W	2	2	64.15	0.702907	0.819918	2.32819	∆∆	WT
YML124C	14	11	506.66	0.704409	0.820769	1.28624	∆∆	WT
YBR130C	3	1	74.64	0.704476	0.820769	1.89024	∆∆	WT
YNL071W	13	9	460.74	0.706317	0.822424	1.12626	∆∆	WT
YER099C	7	2	180.24	0.707599	0.823249	1.04867	∆∆	WT
YML016C	5	3	29.61	0.707867	0.823249	1.11382	WT	∆∆
YNL075W	1	1	48.08	0.711562	0.827053	4.42508	∆∆	WT
YKR008W	8	2	74.13	0.712568	0.827377	1.90382	∆∆	WT
YOR069W	7	3	51.28	0.712687	0.827377	1.68936	∆∆	WT
YDL111C	4	2	87.5	0.713159	0.827433	7.13148	WT	∆∆
YIR022W	4	4	150.43	0.714322	0.828291	1.05174	∆∆	WT
YBR171W	2	2	33.17	0.716629	0.830474	2.35575	∆∆	WT
YDR036C	4	1	54.62	0.717678	0.830607	1.0343	WT	∆∆
YKR056W	6	2	80.95	0.717958	0.830607	1.17286	∆∆	WT
YMR214W	5	1	91.79	0.718091	0.830607	1.09922	WT	∆∆
YOR265W	6	6	232.04	0.718745	0.830607	1.03697	WT	∆∆
YIR038C	7	5	173.49	0.718868	0.830607	1.07224	∆∆	WT
YGR090W	16	11	360.96	0.720625	0.832145	1.05072	∆∆	WT
YOR122C	4	4	279.09	0.722121	0.83226	1.04033	WT	∆∆
YBR198C	12	4	92.2	0.72323	0.83226	1.009	∆∆	WT
YCR017C	1	1	15.77	0.723529	0.83226	1.77134	WT	∆∆
YDR345C	8	7	294.01	0.723576	0.83226	1.09927	∆∆	WT
YDL065C	3	1	30.18	0.723664	0.83226	1.49282	∆∆	WT
YHR128W	9	5	331.03	0.723948	0.83226	1.03824	WT	∆∆
YFL014W	8	6	780.31	0.724628	0.83226	1.11878	∆∆	WT
YDR060W	10	6	229.96	0.724798	0.83226	1.21618	WT	∆∆
YDR294C	9	6	102.25	0.725036	0.83226	1.04238	WT	∆∆
YLR197W	15	14	715.94	0.725259	0.83226	1.02587	WT	∆∆
YCR077C	7	3	109.72	0.725408	0.83226	1.05093	WT	∆∆
YJL054W	1	1	17.36	0.727261	0.832888	1.3024	WT	∆∆
YDL185W	60	53	2885.56	0.728557	0.832888	1.01964	WT	∆∆
YEL032W	9	4	112.32	0.728999	0.832888	1.27385	∆∆	WT
YHR199C	3	1	40.6	0.729095	0.832888	1.42701	WT	∆∆
YKL068W	2	1	16.14	0.729174	0.832888	1.03655	∆∆	WT
YLR354C	20	15	1367.96	0.729795	0.832888	1.03252	∆∆	WT
YOR224C	5	4	225.83	0.730002	0.832888	1.04112	∆∆	WT
YIL064W	5	3	49.26	0.7302	0.832888	1.25056	∆∆	WT
YDR493W	4	2	52.81	0.730638	0.832888	1.07361	∆∆	WT
YOL149W	1	1	64.57	0.73094	0.832888	1.98741	∆∆	WT
YKL060C	31	28	2081.44	0.730959	0.832888	1.01812	WT	∆∆
YHR112C	7	4	75.74	0.731067	0.832888	1.04137	∆∆	WT
YBR245C	18	6	205.42	0.734469	0.836276	1.04691	WT	∆∆
YKL197C	7	1	44.56	0.735668	0.837155	2.48925	∆∆	WT
YKL065C	4	2	57.19	0.738738	0.840158	1.38047	∆∆	WT
YDL112W	13	8	154.05	0.740456	0.841623	1.0625	WT	∆∆
YPR143W	4	2	73.33	0.741647	0.842487	1.04825	∆∆	WT
YMR202W	3	3	152.36	0.745318	0.846165	1.0185	WT	∆∆
YNL014W	18	2	913.16	0.748779	0.849496	1.89624	∆∆	WT
YDR174W	6	4	184.22	0.749352	0.849496	1.00807	∆∆	WT
YPL085W	16	9	183.5	0.749556	0.849496	1.05578	WT	∆∆
YOR133W	68	57	4253.77	0.750419	0.849763	1.03057	∆∆	WT
YPR085C	3	1	28.83	0.750661	0.849763	14.9554	∆∆	WT
YBL045C	18	15	563.91	0.751753	0.850507	1.03545	∆∆	WT
YKL143W	3	2	74.72	0.753314	0.85178	1.06756	WT	∆∆
YGR094W	56	38	2348.78	0.754799	0.852967	1.01421	WT	∆∆
YIL094C	17	12	609.18	0.756016	0.853705	1.00828	WT	∆∆
YNL004W	6	5	93.55	0.756326	0.853705	1.06681	∆∆	WT
YLR274W	6	2	61.24	0.758544	0.855715	1.05866	∆∆	WT
YKR070W	4	3	106.01	0.760163	0.857047	1.1258	∆∆	WT
YGR209C	10	6	524.31	0.764132	0.861024	1.02361	WT	∆∆
YER091C	53	46	3631.87	0.767488	0.863896	1.01293	WT	∆∆
YPL265W	6	5	110.36	0.767564	0.863896	1.20092	∆∆	WT
YBL050W	12	11	373.59	0.769919	0.866048	1.02832	∆∆	WT
YPL190C	7	6	159.37	0.772447	0.868392	1.20199	∆∆	WT
YDR064W	11	10	596.26	0.773289	0.868839	1.05785	∆∆	WT
YIL021W	4	2	109.85	0.775575	0.870907	1.10504	WT	∆∆
YPL106C	47	28	2424.39	0.776483	0.8714	1.01079	WT	∆∆
YHL039W	8	4	130.58	0.776905	0.8714	1.80072	∆∆	WT
YLR178C	6	6	189.93	0.777376	0.871428	1.08581	∆∆	WT
YCR002C	11	9	303.61	0.77942	0.873219	1.01951	∆∆	WT
YML093W	7	3	42.04	0.781716	0.87495	1.75249	∆∆	WT
YFL028C	3	3	71.74	0.78186	0.87495	1.09563	∆∆	WT
YBR214W	4	2	79.18	0.783591	0.876385	1.23964	∆∆	WT
YMR243C	6	3	144.2	0.784711	0.877136	1.19209	∆∆	WT
YLR088W	4	4	101.55	0.787593	0.879089	1.01151	∆∆	WT
YMR039C	4	2	139.23	0.787921	0.879089	1.04897	∆∆	WT
YOR293W	9	7	440.31	0.788333	0.879089	1.00613	WT	∆∆
YBR279W	7	4	71.26	0.789356	0.879089	1.07322	∆∆	WT
YOR063W	34	25	1707.99	0.79009	0.879089	1.0051	WT	∆∆
YJL012C	6	4	139.81	0.790454	0.879089	2.09248	∆∆	WT
YOL120C	9	3	463.28	0.790709	0.879089	1.0162	WT	∆∆
YOR243C	12	8	359.21	0.791043	0.879089	1.02677	WT	∆∆
YMR152W	5	3	45.02	0.791136	0.879089	1.6903	∆∆	WT
YLL048C	24	11	324.89	0.791153	0.879089	1.14379	∆∆	WT
YOL086C	25	13	1643.35	0.791405	0.879089	1.03196	∆∆	WT
YDR510W	6	4	181.13	0.792139	0.879404	1.07209	∆∆	WT
YKL212W	16	14	554.93	0.792794	0.879632	1.41497	∆∆	WT
YDR303C	8	1	75.91	0.793272	0.879664	1.65208	∆∆	WT
YER068W	3	2	19.3	0.796579	0.882518	1.10997	∆∆	WT
YNL181W	11	5	76.22	0.796761	0.882518	1.03289	WT	∆∆
YNL182C	4	4	31.92	0.7972	0.882518	13.5268	∆∆	WT
YLR221C	5	1	57.2	0.800281	0.885427	1.06963	WT	∆∆
YCR051W	5	4	232.1	0.801014	0.885736	1.00269	WT	∆∆
YJR077C	12	11	492.55	0.802739	0.887142	1.24214	∆∆	WT
YDL052C	5	2	53.81	0.803342	0.887307	1.08755	WT	∆∆
YOL004W	12	7	72.69	0.804775	0.888221	1.71021	WT	∆∆
YBR026C	10	5	268.74	0.805079	0.888221	1.00763	WT	∆∆
YMR275C	7	2	53.05	0.807176	0.890033	1.22399	∆∆	WT
YGR027C	7	4	352.33	0.808059	0.890505	1.0016	WT	∆∆
YEL030W	18	3	533.86	0.809506	0.891597	1.08748	∆∆	WT
YDR518W	4	4	76.6	0.810527	0.892219	1.01438	∆∆	WT
YOR007C	21	16	944.02	0.811078	0.892322	1.06731	WT	∆∆
YBL041W	7	7	173.8	0.811916	0.892742	1.02433	∆∆	WT
YDL161W	9	3	146.55	0.813867	0.894385	1.12951	WT	∆∆
YFL022C	22	17	1152.56	0.815726	0.895924	1.0765	∆∆	WT
YBR162C	6	5	205.51	0.817021	0.896734	1.19937	∆∆	WT
YDR161W	4	2	63.79	0.817743	0.896734	1.00964	WT	∆∆
YKL053C-A	2	2	36.11	0.81784	0.896734	1.17316	∆∆	WT
YBR126C	18	14	643.62	0.822841	0.901712	1.03476	∆∆	WT
YJR049C	4	2	47.81	0.824004	0.902289	2.25774	∆∆	WT
YOL121C	15	8	633.29	0.824291	0.902289	1.04005	∆∆	WT
YLR372W	2	1	81.64	0.825878	0.903132	10.5151	∆∆	WT
YBR269C	3	3	85.79	0.825984	0.903132	1.06274	∆∆	WT
YNR046W	3	1	104.21	0.826743	0.903456	1.68654	∆∆	WT
YDR234W	15	9	395.34	0.828687	0.905075	1.04233	∆∆	WT
YLR195C	8	6	194.01	0.830396	0.906434	1.01891	WT	∆∆
YBR137W	2	1	96.79	0.832108	0.907735	1.01431	∆∆	WT
YDR533C	9	8	335.35	0.832717	0.907735	1.01113	WT	∆∆
YOR285W	7	7	166.98	0.83298	0.907735	1.03091	∆∆	WT
YCR083W	5	5	135.19	0.834648	0.909046	1.22586	WT	∆∆
YLR002C	7	2	114.22	0.838971	0.912794	18.8436	∆∆	WT
YMR237W	7	3	83.09	0.839023	0.912794	1.01855	∆∆	WT
YGL153W	7	5	180.12	0.840017	0.913367	1.74778	WT	∆∆
YGR119C	2	1	46.17	0.840884	0.913801	1.23142	WT	∆∆
YOR181W	7	2	69.53	0.841827	0.913954	3.13883	WT	∆∆
YMR308C	9	7	238.39	0.841959	0.913954	1.07714	∆∆	WT
YOR194C	1	1	58.62	0.843112	0.914697	1.9554	∆∆	WT
YGR282C	8	6	439.5	0.84542	0.916692	1.15027	WT	∆∆
YHL015W	12	12	630.18	0.846558	0.917418	1.03874	∆∆	WT
YOL049W	11	5	261.52	0.847661	0.917988	1.06804	∆∆	WT
YLR058C	37	34	1973.83	0.848024	0.917988	1.01776	∆∆	WT
YHR201C	10	8	168.84	0.849006	0.91846	1.02517	∆∆	WT
YER143W	3	2	28.65	0.849399	0.91846	1.02588	∆∆	WT
YDR507C	17	4	99.64	0.851392	0.919536	1.4607	WT	∆∆
YMR071C	2	2	42.77	0.851401	0.919536	1.36813	∆∆	WT
YLR301W	12	9	541.36	0.851806	0.919536	1.0489	∆∆	WT
YLR192C	7	6	389.59	0.85309	0.919647	1.03103	∆∆	WT
YJL190C	11	9	747.85	0.854214	0.919647	1.01041	∆∆	WT
YDR465C	4	2	60.5	0.854347	0.919647	1.70851	∆∆	WT
YLR409C	8	4	127.75	0.854734	0.919647	1.04884	∆∆	WT
YLR290C	2	1	17.42	0.854771	0.919647	2.22896	WT	∆∆
YMR076C	6	2	47.34	0.854961	0.919647	1.51127	∆∆	WT
YJR145C	22	14	1127.63	0.855201	0.919647	1.01839	∆∆	WT
YCL026C-B	1	1	34.44	0.855758	0.919696	6.1253	WT	∆∆
YNL084C	5	3	140.93	0.856188	0.919696	1.31063	∆∆	WT
YMR130W	6	4	61.68	0.858965	0.922173	4.28312	∆∆	WT
YJR069C	9	9	384.59	0.860237	0.922693	1.01516	∆∆	WT
YML063W	29	3	1232.04	0.860693	0.922693	1.00599	WT	∆∆
YOR137C	6	4	39.24	0.861002	0.922693	2.40695	∆∆	WT
YER178W	24	18	798.4	0.861337	0.922693	1.02962	∆∆	WT
YBL020W	2	2	51.25	0.863285	0.923582	1.15216	∆∆	WT
YPL274W	1	1	26.5	0.863855	0.923582	1.45848	∆∆	WT
YKR039W	3	1	46.75	0.8639	0.923582	1.55155	WT	∆∆
YLR285W	2	2	58.33	0.864057	0.923582	1.0391	WT	∆∆
YOR002W	2	2	35.6	0.865974	0.925126	1.0038	∆∆	WT
YIL044C	1	1	52.63	0.867677	0.926242	3.98105	∆∆	WT
YMR300C	23	19	768.97	0.867967	0.926242	1.00437	WT	∆∆
YBL092W	8	5	358.83	0.869008	0.926847	1.01389	∆∆	WT
YER156C	13	8	362.17	0.869885	0.927277	1.02304	∆∆	WT
YJR073C	2	2	79.77	0.870686	0.927367	1.39301	∆∆	WT
YPL120W	4	1	37.26	0.871741	0.927367	1.20641	∆∆	WT
YAL022C	2	1	14.73	0.872078	0.927367	3.36235	∆∆	WT
YIR026C	2	2	66.3	0.872247	0.927367	1.22696	WT	∆∆
YKL179C	9	3	78.26	0.872542	0.927367	2.82507	∆∆	WT
YBR196C	32	27	1673.68	0.872816	0.927367	1.01679	∆∆	WT
YHR068W	19	16	822.57	0.874602	0.928259	1.0004	WT	∆∆
YNL244C	9	7	287.28	0.874605	0.928259	1.01122	∆∆	WT
YMR311C	7	7	65.62	0.876831	0.930064	1.04482	∆∆	WT
YKR001C	23	17	539.91	0.877257	0.930064	1.04504	∆∆	WT
YDL168W	8	7	308.6	0.879073	0.931484	1.01191	∆∆	WT
YMR186W	51	10	3375.25	0.879641	0.931581	1.02388	∆∆	WT
YLR066W	2	2	44.29	0.883949	0.935636	1.16084	∆∆	WT
YGR186W	12	6	85.55	0.884647	0.935868	1.02661	∆∆	WT
YEL037C	10	10	376.19	0.887549	0.938431	1.03042	∆∆	WT
YHR013C	5	5	119.79	0.889475	0.939959	1.29508	∆∆	WT
YEL034W	12	9	705.18	0.890736	0.940179	1.00033	WT	∆∆
YDL144C	3	2	46.73	0.89083	0.940179	1.11199	∆∆	WT
YEL056W	4	3	56.27	0.891126	0.940179	1.01572	WT	∆∆
YOR124C	7	3	75.67	0.892135	0.940736	1.26752	∆∆	WT
YHR158C	15	10	161.67	0.89298	0.941119	1.14007	∆∆	WT
YGR155W	36	31	2135.47	0.895175	0.942924	1.0123	∆∆	WT
YML127W	6	4	49.05	0.896219	0.943515	1.09307	∆∆	WT
YKL128C	4	4	61.02	0.89716	0.943863	1.05716	∆∆	WT
YFL008W	13	6	61.93	0.897514	0.943863	1.00571	WT	∆∆
YIL105C	6	2	59.65	0.898569	0.944464	1.01923	WT	∆∆
YBL036C	11	7	276.77	0.900507	0.945992	1.00527	WT	∆∆
YML073C	18	4	811.86	0.90272	0.947626	1.05998	∆∆	WT
YPL263C	9	6	283.19	0.903032	0.947626	1.07218	∆∆	WT
YBL007C	13	6	240.95	0.905362	0.949139	1.23904	∆∆	WT
YHR010W	11	1	676.67	0.905444	0.949139	1.9197	∆∆	WT
YMR099C	21	16	823.06	0.90659	0.949347	1.00433	WT	∆∆
YLR387C	6	3	29.44	0.906614	0.949347	1.00287	WT	∆∆
YNR021W	8	4	165.7	0.907559	0.949508	1.07908	∆∆	WT
YMR215W	8	6	284.56	0.907739	0.949508	1.11466	∆∆	WT
YHR037W	10	9	188.89	0.908991	0.950002	1.01275	∆∆	WT
YLR431C	6	1	35	0.909184	0.950002	1.32132	WT	∆∆
YDR045C	1	1	35.97	0.910237	0.950595	1.02093	∆∆	WT
YLR208W	13	12	534.02	0.911254	0.951104	1.07117	∆∆	WT
YGR082W	5	5	202.84	0.911698	0.951104	1.77983	WT	∆∆
YOR065W	2	2	74.06	0.913513	0.95249	2.34987	WT	∆∆
YHR089C	6	3	120.6	0.914273	0.952774	1.00575	∆∆	WT
YBR169C	19	5	680.34	0.915306	0.953005	1.02137	WT	∆∆
YCL025C	5	1	38.85	0.915469	0.953005	2.97024	∆∆	WT
YKR072C	4	1	50.09	0.916311	0.953373	2.29826	WT	∆∆
YEL060C	10	6	299.47	0.918319	0.954225	1.24664	∆∆	WT
YER025W	23	18	908.51	0.918522	0.954225	1.01881	∆∆	WT
YGR210C	9	7	216.96	0.918594	0.954225	1.28638	WT	∆∆
YLR418C	10	5	162.37	0.920452	0.955647	1.65215	WT	∆∆
YGR012W	5	2	116.94	0.922476	0.956632	1.89749	∆∆	WT
YGL213C	3	2	69.38	0.922762	0.956632	1.62787	∆∆	WT
YMR306W	10	5	89.86	0.922869	0.956632	1.44723	∆∆	WT
YCL044C	1	1	29.95	0.924349	0.957217	1.48929	∆∆	WT
YER019C-A	3	3	69.76	0.924871	0.957217	1.16852	∆∆	WT
YBR085C-A	4	3	194.88	0.925541	0.957217	1.06433	∆∆	WT
YFR004W	7	6	176.91	0.925739	0.957217	1.00553	WT	∆∆
YNL059C	6	3	76.17	0.925881	0.957217	1.0424	WT	∆∆
YDL225W	8	5	175.97	0.93079	0.961783	1.04018	∆∆	WT
YHR107C	12	8	230.88	0.932709	0.963258	1.02788	∆∆	WT
YER103W	28	11	1321.4	0.936072	0.965997	1.0106	WT	∆∆
YKL184W	7	2	51.27	0.93635	0.965997	1.02	∆∆	WT
YLR292C	2	1	17.9	0.939119	0.968342	1.64712	∆∆	WT
YNL207W	2	1	79.88	0.940972	0.969742	1.18248	∆∆	WT
YGR275W	2	1	74.26	0.942089	0.970382	1.30947	WT	∆∆
YEL026W	5	4	303.48	0.945249	0.972863	1.00837	∆∆	WT
YOR136W	14	11	671.78	0.945494	0.972863	1.00413	∆∆	WT
YLR344W	13	2	572.12	0.946911	0.973809	1.18349	∆∆	WT
YGL013C	4	2	51	0.949384	0.975839	1.27772	∆∆	WT
YNL044W	5	3	152.87	0.950513	0.976486	1.19587	∆∆	WT
YER141W	4	1	97.34	0.951337	0.976819	1.66153	WT	∆∆
YJR149W	4	1	39.03	0.951964	0.97695	1.13088	WT	∆∆
YML030W	2	1	33.13	0.954079	0.978606	1.33021	WT	∆∆
YMR128W	14	6	178.33	0.95469	0.97872	1.23102	∆∆	WT
YNR017W	5	5	132.85	0.9553	0.978832	1.03054	∆∆	WT
YPL160W	48	44	2010.61	0.957156	0.980073	1.00945	∆∆	WT
YHR146W	12	8	320.4	0.957894	0.980073	1.00579	∆∆	WT
YDR062W	10	7	222.15	0.958015	0.980073	1.49487	∆∆	WT
YPR125W	13	2	97.16	0.959624	0.981205	1.29234	WT	∆∆
YGR033C	2	1	56.26	0.96224	0.983273	3.49904	∆∆	WT
YDR356W	14	2	71.83	0.962652	0.983273	1.31248	∆∆	WT
YPR165W	9	5	299.15	0.964763	0.984416	1.23886	∆∆	WT
YFL038C	8	4	284.55	0.965434	0.984416	1.02385	∆∆	WT
YMR072W	8	5	152.26	0.965459	0.984416	1.2323	∆∆	WT
YKR026C	3	2	78.66	0.965785	0.984416	1.0337	∆∆	WT
YLR199C	4	4	143.69	0.967035	0.984672	1.06015	∆∆	WT
YOR046C	13	11	539.66	0.967155	0.984672	1.00936	∆∆	WT
YOL113W	5	3	32.49	0.967578	0.984672	1.37637	∆∆	WT
YOR232W	7	6	347.01	0.968062	0.984672	1.05672	∆∆	WT
YBR082C	5	3	114.73	0.969708	0.984672	1.02444	∆∆	WT
YPL243W	12	9	471.94	0.969719	0.984672	1.25471	WT	∆∆
YCR084C	22	16	852.73	0.969746	0.984672	1.02634	∆∆	WT
YDR427W	16	12	330.55	0.970066	0.984672	1.04489	∆∆	WT
YLR262C	5	2	162.92	0.972157	0.986283	1.20119	∆∆	WT
YIL043C	11	9	264.25	0.972737	0.986359	1.23627	∆∆	WT
YKR038C	4	2	40.87	0.975294	0.988385	1.057	∆∆	WT
YGL171W	7	3	136.12	0.975746	0.988385	1.00864	∆∆	WT
YBR149W	16	13	613.39	0.977417	0.988934	1.00397	∆∆	WT
YBL057C	4	1	115.53	0.977737	0.988934	1.18937	∆∆	WT
YGR143W	2	1	74.48	0.977805	0.988934	1.47972	∆∆	WT
YLR209C	6	5	140.02	0.978901	0.98953	1.00211	∆∆	WT
YKL057C	9	3	118.36	0.979931	0.989807	1.1852	∆∆	WT
YER080W	19	15	437.61	0.980441	0.989807	1.02004	∆∆	WT
YER177W	20	5	1233.31	0.980694	0.989807	1.01439	∆∆	WT
YNL243W	17	9	477.59	0.982642	0.991262	1.95989	WT	∆∆
YHR163W	9	8	353.88	0.985332	0.993376	1.00694	∆∆	WT
YHR009C	7	6	227.52	0.985754	0.993376	1.00126	∆∆	WT
YLL018C	31	28	1523.78	0.987034	0.994008	1.01163	∆∆	WT
YGR048W	6	2	91.7	0.987611	0.994008	1.21896	∆∆	WT
YDR365C	7	4	109.31	0.987907	0.994008	1.01139	WT	∆∆
YDL236W	6	5	182.91	0.988504	0.994097	1.01401	∆∆	WT
YMR221C	4	1	54.13	0.99043	0.995313	6.54298	∆∆	WT
YOR042W	9	5	134.87	0.99087	0.995313	1.03545	∆∆	WT
YPL101W	2	1	44.96	0.991241	0.995313	4.09544	∆∆	WT
YMR153W	3	2	35.36	0.992593	0.99616	16.957	∆∆	WT
YGR180C	19	16	932.86	0.994846	0.997683	1.01359	∆∆	WT
YOL095C	6	1	42.3	0.995131	0.997683	2.56398	WT	∆∆
YMR120C	36	21	2110.29	0.996699	0.998291	1.00715	∆∆	WT
YOR116C	8	4	126.8	0.996772	0.998291	1.225	WT	∆∆
YMR142C	10	1	499.81	0.99727	0.998291	1.6036	∆∆	WT
YDR472W	1	1	47.29	0.999813	1	5.24693	∆∆	WT
YLL041C	1	1	43.6	1	1	1	---	---

## Sheet: Dataset6.WT VS caf20M2 proteome
Accession	Peptide.count	Peptides.used.for.quantitation	Confidence.score	Anova..p.	FDR	Max.fold.change	Highest.mean.condition	Lowest.mean.condition
YLR303W	15	12	929.53	1.34e-09	2.6197e-06	40.515	WT	caf20M2
YGL251C	9	1	37.21	3.14e-08	3.06935e-05	176.12	caf20M2	WT
YHR111W	4	1	41.97	8.36e-08	5.44793e-05	38855999	WT	caf20M2
YKL110C	3	1	49.07	1.43e-07	6.5688e-05	14.9281	WT	caf20M2
YLR438W	17	15	612.44	1.68e-07	6.5688e-05	2.14833	WT	caf20M2
YOL139C	11	7	565.2	2.73e-07	7.25794e-05	3.52756	WT	caf20M2
YOR124C	7	3	75.67	2.82e-07	7.25794e-05	4.17575	caf20M2	WT
YOR202W	4	3	58.2	2.97e-07	7.25794e-05	63.5093	caf20M2	WT
YDR348C	4	1	83.36	4.64e-07	0.000100791	Inf	WT	caf20M2
YJL159W;YJL160C	5	2	176.5	5.54e-07	0.000108307	10.8331	WT	caf20M2
YPR191W	17	9	625.94	7.37e-07	0.000130985	1.54672	WT	caf20M2
YDR086C	1	1	31.43	1.08e-06	0.00017595	Inf	caf20M2	WT
YKL210W	40	30	1624.89	1.96e-06	0.000286268	1.69599	caf20M2	WT
YNL212W	10	3	59.28	2.05e-06	0.000286268	19.8534	WT	caf20M2
YOR042W	9	5	134.87	2.77e-06	0.000361023	1.50778	WT	caf20M2
YDR515W	5	1	64.88	3.28e-06	0.000400775	Inf	WT	caf20M2
YNL244C	9	7	287.28	3.7e-06	0.0004255	1.35111	caf20M2	WT
YGL082W	3	2	55.29	6.28e-06	0.000682078	8.18484	WT	caf20M2
YBR149W	16	13	613.39	7.07e-06	0.000727466	1.33382	WT	caf20M2
YBL099W	29	20	1078.5	8.61e-06	0.000841628	1.96291	WT	caf20M2
YMR170C	7	3	234.44	1.23e-05	0.00111079	3.45003	WT	caf20M2
YBR039W	7	7	275.18	1.25e-05	0.00111079	2.24476	WT	caf20M2
YDR258C	28	21	755.91	1.54e-05	0.001309	1.59483	WT	caf20M2
YCR035C	3	2	45.13	1.93e-05	0.00157215	44.9154	caf20M2	WT
YAR035W	4	3	65.04	2.44e-05	0.00190808	196.309	WT	caf20M2
YBR286W	13	10	471.37	2.57e-05	0.00193244	1.43142	WT	caf20M2
YKL196C	9	6	425.7	2.9e-05	0.00209982	2.49528	caf20M2	WT
YOR356W	6	3	186.03	3.08e-05	0.0021505	3.38456	WT	caf20M2
YPL028W	20	17	1119.52	3.33e-05	0.00224488	1.31214	WT	caf20M2
YOL143C	9	8	255.45	3.68e-05	0.00232708	2.77121	WT	caf20M2
YBR010W	3	2	81.1	3.69e-05	0.00232708	4.74553	caf20M2	WT
YNR001C	12	10	667.4	4.64e-05	0.00283475	1.38767	WT	caf20M2
YIL064W	5	3	49.26	4.86e-05	0.00287664	2.70007	caf20M2	WT
YDR292C	4	2	84.05	5.12e-05	0.00287664	5.14907	WT	caf20M2
YKL181W	10	7	308.37	5.15e-05	0.00287664	1.43927	caf20M2	WT
YLR460C	5	2	108.31	5.64e-05	0.00306283	3.57562	caf20M2	WT
YJR121W	24	23	1438.21	7.68e-05	0.00397174	2.08344	WT	caf20M2
YPL231W	107	84	5678.91	7.72e-05	0.00397174	1.7125	caf20M2	WT
YIR001C	6	4	67.42	8.43e-05	0.0042228	1.9232	WT	caf20M2
YMR297W	9	8	234.29	8.64e-05	0.0042228	2.15023	WT	caf20M2
YKR089C	6	1	28.59	9.42e-05	0.00449173	171.667	WT	caf20M2
YNR046W	3	1	104.21	0.000103442	0.00481498	2.02731	caf20M2	WT
YAL029C	8	1	112.67	0.000106188	0.00481894	100.912	WT	caf20M2
YKL104C	34	28	1021.66	0.000108457	0.00481894	1.58432	caf20M2	WT
YDL117W	4	1	40.89	0.000120912	0.00525296	102.616	WT	caf20M2
YJR144W	7	6	177.28	0.000129991	0.00552462	3.07261	WT	caf20M2
YKL067W	9	8	535.12	0.000134471	0.00554246	1.58494	caf20M2	WT
YDR032C	5	4	297.63	0.000138603	0.00554246	1.86604	WT	caf20M2
YAL005C	50	12	3486.48	0.000138916	0.00554246	1.30998	caf20M2	WT
YDR392W	5	2	77.45	0.000142296	0.00556377	91.349	WT	caf20M2
YLR172C	6	2	203.97	0.000152992	0.00586469	1.57929	WT	caf20M2
YKL117W	5	5	288.17	0.000159388	0.00599238	1.65076	caf20M2	WT
YFL018C	23	19	890.38	0.000166341	0.00613579	1.43733	WT	caf20M2
YDR117C	6	3	102.22	0.000187641	0.00666625	14.0263	WT	caf20M2
YIL116W	13	9	470.89	0.00019172	0.00666625	1.55383	WT	caf20M2
YBR263W	18	12	646.48	0.00019487	0.00666625	1.30962	WT	caf20M2
YPL106C	47	28	2424.39	0.000195326	0.00666625	1.25919	WT	caf20M2
YGL245W	47	33	1934.2	0.000197771	0.00666625	1.15589	WT	caf20M2
YKL182W	105	93	5258.32	0.000203587	0.00670526	1.64549	caf20M2	WT
YER086W	27	22	724.89	0.000205788	0.00670526	1.60689	WT	caf20M2
YHR164C	14	2	64.86	0.000228878	0.00733535	5.38971	caf20M2	WT
YGL256W	3	3	46.11	0.000236418	0.00745479	2.24598	WT	caf20M2
YJL026W	18	12	594.36	0.000253076	0.00785339	1.28036	WT	caf20M2
YLR060W	24	17	809.84	0.000270115	0.00825117	1.25534	WT	caf20M2
YIR034C	15	11	562.07	0.000279328	0.00834074	2.23632	WT	caf20M2
YBR112C	12	9	315.72	0.00028158	0.00834074	1.53083	caf20M2	WT
YOL097C	14	9	448.17	0.000304452	0.00888364	1.33882	WT	caf20M2
YHR013C	5	5	119.79	0.000312276	0.00897793	1.57766	caf20M2	WT
YBR249C	19	14	741.56	0.000324496	0.00916088	1.59896	WT	caf20M2
YDR233C	9	7	333.89	0.000328011	0.00916088	1.81333	WT	caf20M2
YLR058C	37	34	1973.83	0.000356052	0.00980397	1.36866	WT	caf20M2
YBL076C	56	42	2140.42	0.000376808	0.0102314	1.21335	caf20M2	WT
YML126C	21	15	889.36	0.000387433	0.0103758	1.40211	WT	caf20M2
YHL030W	17	7	326.06	0.000418545	0.0109651	4.69785	caf20M2	WT
YCR088W	23	18	751.5	0.000420654	0.0109651	1.24892	WT	caf20M2
YKL080W	16	14	862.98	0.000438078	0.011269	1.3047	caf20M2	WT
YER090W	16	13	772.44	0.000460655	0.0115897	1.2566	WT	caf20M2
YKR071C	5	4	147.05	0.000467625	0.0115897	1.47796	caf20M2	WT
YPL271W	2	2	92.13	0.000468331	0.0115897	1.59507	WT	caf20M2
YBR058C	5	3	107.33	0.000476265	0.0116387	5.82442	caf20M2	WT
YML105C	3	2	70.29	0.00049432	0.0119308	3.66558	caf20M2	WT
YBL036C	11	7	276.77	0.000519515	0.012386	1.31945	WT	caf20M2
YBR126C	18	14	643.62	0.000546044	0.0128616	1.26676	WT	caf20M2
YLR088W	4	4	101.55	0.00055371	0.0128869	1.28962	WT	caf20M2
YKL140W	1	1	41.47	0.000588043	0.013525	29.74	WT	caf20M2
YER103W	28	11	1321.4	0.00059907	0.0136184	1.94645	WT	caf20M2
YER010C	5	2	75.69	0.000610315	0.0137146	2.63004	WT	caf20M2
YDL053C	1	1	73.55	0.000641647	0.0142548	2.59149	caf20M2	WT
YLR384C	17	11	389.75	0.000652513	0.0142959	1.65788	WT	caf20M2
YGL202W	23	20	1393.69	0.000660875	0.0142959	1.42195	WT	caf20M2
YDL131W	24	5	1371.84	0.000665437	0.0142959	1.26394	WT	caf20M2
YER120W	8	6	340.99	0.000686162	0.0145809	1.51812	WT	caf20M2
YJR042W	5	1	60.55	0.000733881	0.0153428	6.88832	WT	caf20M2
YOR153W	16	9	477.72	0.000740925	0.0153428	2.7647	WT	caf20M2
YOR109W	9	5	249.25	0.000751954	0.0153428	1.74841	caf20M2	WT
YGR085C	10	7	440.94	0.000753408	0.0153428	1.27611	caf20M2	WT
YDL215C	24	17	748.48	0.000771065	0.0155405	2.07148	WT	caf20M2
YNL079C	18	15	958.78	0.000789124	0.0157422	1.58659	WT	caf20M2
YKL172W	9	5	256.41	0.000812061	0.0160361	1.68025	caf20M2	WT
YPL091W	19	11	594.04	0.000823815	0.0161056	1.33994	WT	caf20M2
YMR226C	16	12	750.7	0.000842323	0.0163044	1.34758	WT	caf20M2
YOL022C	7	3	76.17	0.000870828	0.0165735	1.53276	WT	caf20M2
YEL046C	15	12	672.81	0.000874943	0.0165735	1.32012	WT	caf20M2
YER031C	7	4	355.55	0.000885356	0.0165735	1.57456	WT	caf20M2
YDL135C	5	5	181.69	0.000890138	0.0165735	1.34376	WT	caf20M2
YML070W	20	17	845.31	0.000913919	0.0168558	1.25244	WT	caf20M2
YJL172W	11	10	292.54	0.000944612	0.0171607	2.32876	WT	caf20M2
YMR105C	9	7	297.05	0.000951668	0.0171607	1.67377	WT	caf20M2
YKR059W	26	21	1897.25	0.000958107	0.0171607	1.2788	caf20M2	WT
YCR060W	1	1	14.31	0.000965562	0.0171607	87.2746	caf20M2	WT
YLR364W	3	3	59.95	0.000991906	0.0173482	5.01022	caf20M2	WT
YGL026C	33	27	1766.05	0.000993861	0.0173482	1.43373	WT	caf20M2
YPL154C	12	10	673.4	0.00103819	0.0178096	1.56321	WT	caf20M2
YLR017W	7	5	150.71	0.00103852	0.0178096	1.45812	WT	caf20M2
YDR272W	5	4	165.46	0.00105916	0.0180058	1.77445	WT	caf20M2
YKL053C-A	2	2	36.11	0.00107853	0.0181769	3.26083	caf20M2	WT
YOR046C	13	11	539.66	0.00110639	0.0184872	1.43766	WT	caf20M2
YOR176W	9	5	173.04	0.00115962	0.0189847	2.17801	WT	caf20M2
YLR134W	16	8	616.93	0.00116759	0.0189847	1.83866	caf20M2	WT
YFL017C	3	2	47.27	0.00117962	0.0189847	1.8287	WT	caf20M2
YFL048C	5	2	150.56	0.00118425	0.0189847	2.19036	WT	caf20M2
YGR081C	3	2	31.57	0.00118472	0.0189847	1.47423	caf20M2	WT
YJL140W	3	3	104.56	0.00120458	0.0191028	1.4512	WT	caf20M2
YNL308C	12	6	191.77	0.00121278	0.0191028	1.70427	WT	caf20M2
YNL055C	16	12	793.81	0.0012214	0.0191028	1.76501	WT	caf20M2
YOR276W	4	4	91.93	0.0012769	0.01966	2.84954	WT	caf20M2
YKL206C	2	2	41.32	0.00128731	0.01966	1.61953	caf20M2	WT
YKL184W	7	2	51.27	0.00130187	0.01966	2.73275	caf20M2	WT
YBR080C	15	8	253.8	0.00130281	0.01966	1.40814	WT	caf20M2
YHR170W	14	10	469.02	0.00130732	0.01966	1.38138	WT	caf20M2
YLR250W	4	4	123.42	0.00133255	0.0198865	1.90513	WT	caf20M2
YOL016C	3	1	24.68	0.00139137	0.020607	1.34732	WT	caf20M2
YNL220W	22	20	1040.13	0.00141903	0.0207357	1.12446	WT	caf20M2
YGL221C	12	9	393.37	0.00142127	0.0207357	1.37233	WT	caf20M2
YGL097W	3	3	62.63	0.00143907	0.0208398	2.60988	WT	caf20M2
YIL022W	12	7	320.84	0.00146766	0.0210977	1.80374	WT	caf20M2
YAL016W	12	8	247.76	0.00153482	0.021902	1.58248	caf20M2	WT
YER055C	16	15	770.98	0.0015527	0.0219711	1.19639	WT	caf20M2
YNL160W	5	5	217.64	0.00156214	0.0219711	2.42842	WT	caf20M2
YGR001C	4	3	130.08	0.00162869	0.0225113	1.21487	WT	caf20M2
YML094W	6	4	132.95	0.00163126	0.0225113	1.33469	WT	caf20M2
YMR235C	14	12	542.92	0.00163523	0.0225113	1.3833	caf20M2	WT
YNR038W	5	1	65.53	0.00165007	0.0225113	23.1713	WT	caf20M2
YBR072W	11	10	734.56	0.00165812	0.0225113	2.53943	WT	caf20M2
YKL069W	4	2	54.42	0.00167928	0.0226414	1.98432	caf20M2	WT
YML127W	6	4	49.05	0.00172666	0.0231206	1.43812	caf20M2	WT
YKL018W	1	1	25.04	0.00174861	0.0232553	4.59419	caf20M2	WT
YCR052W	5	2	33.83	0.00178815	0.0234911	1.54611	caf20M2	WT
YLR027C	21	19	1088.62	0.00179037	0.0234911	1.46371	WT	caf20M2
YML092C	8	7	379.55	0.0018371	0.0238043	1.40997	WT	caf20M2
YLR335W	15	11	354.47	0.00183859	0.0238043	1.36569	WT	caf20M2
YMR062C	24	18	1097.34	0.00185977	0.0239201	1.71457	WT	caf20M2
YFL022C	22	17	1152.56	0.00187641	0.0239763	1.24781	WT	caf20M2
YAL035W	36	19	1151.08	0.00192255	0.0244064	1.60837	caf20M2	WT
YPL212C	16	10	223.35	0.00195122	0.024549	1.6796	WT	caf20M2
YCR081C-A	2	2	16.17	0.0019589	0.024549	1.97734	caf20M2	WT
YAL060W	6	4	115.45	0.00197731	0.0246219	2.03117	caf20M2	WT
YOR020C	7	3	378.22	0.00201088	0.024831	1.3758	caf20M2	WT
YCR004C	8	5	267.97	0.0020195	0.024831	1.52554	WT	caf20M2
YFR051C	6	4	63.94	0.00203951	0.0249203	1.56649	WT	caf20M2
YOR184W	20	19	1212.9	0.0020631	0.0250519	1.46923	WT	caf20M2
YJL052W	29	14	1429.99	0.00221935	0.0267829	2.14813	WT	caf20M2
YBR056W	7	3	167.73	0.00230941	0.0276988	2.12131	WT	caf20M2
YKR018C	13	9	310.44	0.00235062	0.0280211	1.58508	caf20M2	WT
YDR063W	1	1	45.76	0.00240683	0.0285173	1.53904	caf20M2	WT
YLR420W	12	9	197.45	0.00246151	0.0289895	1.73716	WT	caf20M2
YDR037W	30	26	1499.85	0.00258423	0.0299799	1.3425	WT	caf20M2
YAL022C	2	1	14.73	0.00258794	0.0299799	7.6078	caf20M2	WT
YOR317W	27	20	823.98	0.00259161	0.0299799	1.51518	WT	caf20M2
YLR397C	9	5	120.09	0.00262798	0.0302218	1.5584	WT	caf20M2
YDR097C	14	2	70.06	0.00267745	0.0306106	2.7166	caf20M2	WT
YCR002C	11	9	303.61	0.00271493	0.0308587	1.60039	WT	caf20M2
YNL274C	6	2	105.73	0.00280624	0.0315415	1.57886	WT	caf20M2
YBR222C	8	3	171.11	0.00280727	0.0315415	2.03917	WT	caf20M2
YJR049C	4	2	47.81	0.00288685	0.0322502	3.21538	WT	caf20M2
YBR177C	10	9	482.57	0.0029349	0.0326008	1.81306	WT	caf20M2
YDL122W	7	4	106.39	0.0030099	0.033245	1.43972	WT	caf20M2
YHR037W	10	9	188.89	0.00304732	0.0334692	1.55909	WT	caf20M2
YOR230W	17	15	825.87	0.0030804	0.0335606	1.5101	WT	caf20M2
YMR009W	2	2	105.28	0.00309799	0.0335606	2.52558	caf20M2	WT
YPL078C	4	3	278.22	0.00310715	0.0335606	3.09698	WT	caf20M2
YBR068C	4	2	79.17	0.00313409	0.0336657	6.67656	caf20M2	WT
YDL022W	9	7	667.35	0.00316109	0.0337702	1.51528	WT	caf20M2
YKL126W;YMR104C	6	4	134.37	0.00320614	0.0340652	1.9882	caf20M2	WT
YLR208W	13	12	534.02	0.00324777	0.0341218	1.32686	WT	caf20M2
YKL085W	17	14	776.47	0.00325028	0.0341218	1.60967	caf20M2	WT
YBR160W	6	4	111.09	0.00327091	0.0341218	1.37395	WT	caf20M2
YNL061W	12	9	446.48	0.00328128	0.0341218	1.54093	WT	caf20M2
YIL083C	9	9	291.8	0.00333332	0.0344386	1.81791	WT	caf20M2
YPR145W	32	20	1347.93	0.00334697	0.0344386	1.51912	WT	caf20M2
YBR006W	8	5	116.16	0.00339354	0.0347349	1.82455	WT	caf20M2
YDR408C	6	6	352.86	0.00342846	0.0349096	2.18128	caf20M2	WT
YFL014W	8	6	780.31	0.0034882	0.0353339	2.11658	WT	caf20M2
YKR043C	10	8	561.67	0.00352691	0.0353345	1.2475	caf20M2	WT
YBR127C	31	23	1813.62	0.00352873	0.0353345	1.22137	WT	caf20M2
YGR185C	21	14	804.06	0.00354249	0.0353345	1.33625	WT	caf20M2
YFL005W	10	7	350.38	0.00360001	0.0355448	1.48528	WT	caf20M2
YOL140W	9	8	243.36	0.00361316	0.0355448	2.20472	WT	caf20M2
YPL010W	5	3	134.4	0.00363312	0.0355448	1.82565	caf20M2	WT
YOR074C	6	4	154	0.0036534	0.0355448	1.43917	caf20M2	WT
YKL204W	5	3	99.75	0.00365448	0.0355448	3.74305	WT	caf20M2
YKR082W	7	3	89.32	0.00371539	0.0359583	2.63914	caf20M2	WT
YHR046C	3	2	40.34	0.00375212	0.0360208	2.14461	WT	caf20M2
YLR209C	6	5	140.02	0.00375869	0.0360208	1.55915	WT	caf20M2
YDL226C	16	11	370.63	0.00386956	0.0369024	1.59984	WT	caf20M2
YDL213C	5	3	77.33	0.0039193	0.0371953	1.91807	WT	caf20M2
YDL141W	4	2	29.82	0.00399672	0.0377468	1.44803	WT	caf20M2
YML052W	4	2	100.27	0.00407492	0.0381893	6.69738	WT	caf20M2
YAR007C	9	8	189.93	0.00408265	0.0381893	1.55571	caf20M2	WT
YKL040C	7	7	305.48	0.00410379	0.0382044	1.3351	caf20M2	WT
YPL111W	11	7	231.04	0.00414701	0.0384238	1.77748	WT	caf20M2
YIL041W	16	14	718.55	0.00417907	0.0385381	1.29908	WT	caf20M2
YPR165W	9	5	299.15	0.00423179	0.0386479	1.79633	WT	caf20M2
YHR104W	15	11	643.91	0.00425373	0.0386479	1.23499	WT	caf20M2
YHR192W	1	1	25.2	0.00426547	0.0386479	Inf	WT	caf20M2
YAL021C	7	2	53.93	0.0042861	0.0386479	1.78696	caf20M2	WT
YDL078C	7	3	209.85	0.00430607	0.0386479	2.33792	WT	caf20M2
YER089C	10	6	346.13	0.00430958	0.0386479	1.32726	WT	caf20M2
YAL044C	6	5	511.16	0.00434116	0.0387533	1.59682	caf20M2	WT
YBL058W	12	7	382.62	0.00439375	0.0390415	1.35578	WT	caf20M2
YNL045W	4	4	100.95	0.00441338	0.0390415	1.4326	WT	caf20M2
YMR307W	8	8	529.44	0.004462	0.039177	1.22584	WT	caf20M2
YBR244W	6	3	221.56	0.00446878	0.039177	1.65063	WT	caf20M2
YBR159W	6	3	148.49	0.00450806	0.0393449	3.1481	caf20M2	WT
YPL129W	4	4	157.83	0.00480002	0.0415328	1.67773	WT	caf20M2
YPR113W	6	3	77.06	0.00480123	0.0415328	2.85031	WT	caf20M2
YLR351C	12	10	417.37	0.00485085	0.0416332	1.51122	WT	caf20M2
YBL091C	8	4	190.16	0.00485544	0.0416332	1.33966	WT	caf20M2
YDR035W	16	11	652.18	0.00490983	0.0419158	1.31245	WT	caf20M2
YNL248C	12	6	194.96	0.00497852	0.0423174	1.6818	WT	caf20M2
YPL206C	2	1	29.04	0.00502546	0.04252	13.5678	WT	caf20M2
YOR158W	2	1	29.81	0.00504585	0.04252	3.90086	WT	caf20M2
YOL144W	3	1	31.73	0.0052835	0.0443315	2565.34	WT	caf20M2
YDR448W	1	1	15.47	0.00548714	0.0458434	1.98212	WT	caf20M2
YOR257W	3	2	61.35	0.00564193	0.0469361	4.07733	WT	caf20M2
YDR516C	8	6	265.8	0.00571597	0.0472096	1.41653	WT	caf20M2
YBR009C	5	5	263.59	0.00575921	0.0472096	1.36505	WT	caf20M2
YPL160W	48	44	2010.61	0.005795	0.0472096	1.12237	WT	caf20M2
YBR169C	19	5	680.34	0.00580976	0.0472096	2.11392	WT	caf20M2
YAL059W	4	1	118	0.0058171	0.0472096	1.51266	caf20M2	WT
YHR200W	7	7	349.14	0.00582701	0.0472096	1.30167	caf20M2	WT
YNL154C	4	3	108.85	0.00584384	0.0472096	2.66621	WT	caf20M2
YDR152W	4	3	85.85	0.0060727	0.0488565	1.8424	WT	caf20M2
YER073W	27	19	1034.68	0.00619198	0.0495906	1.65055	WT	caf20M2
YDL195W	32	24	961.2	0.00621468	0.0495906	1.35499	WT	caf20M2
YMR031C	22	10	538.06	0.00634864	0.0503548	1.46128	WT	caf20M2
YKL081W	23	15	982.69	0.00637781	0.0503548	1.19397	caf20M2	WT
YDR381C-A	2	2	31.57	0.00643131	0.0503548	3.7289	caf20M2	WT
YCR005C	9	8	280.3	0.00644185	0.0503548	1.74225	caf20M2	WT
YLR410W	22	14	469.83	0.00647027	0.0503548	1.41099	caf20M2	WT
YJL217W	9	6	320.52	0.00648131	0.0503548	1.98327	WT	caf20M2
YGR086C	16	11	1004.76	0.00649075	0.0503548	1.25924	WT	caf20M2
YBR208C	22	13	384.3	0.00689307	0.0532646	1.27144	WT	caf20M2
YNR033W	7	1	44.38	0.00695563	0.0534879	6.32942	caf20M2	WT
YKL152C	19	16	1026.12	0.00699253	0.0534879	1.19305	caf20M2	WT
YLR244C	10	9	325.18	0.00703704	0.0534879	1.34372	WT	caf20M2
YGR271W	9	2	61.4	0.00703705	0.0534879	1.60602	WT	caf20M2
YEL037C	10	10	376.19	0.00705952	0.0534879	1.34259	WT	caf20M2
YKL180W	12	1	851	0.00708612	0.0534879	1.3582	caf20M2	WT
YCR075W-A	2	1	25.24	0.00711483	0.053498	3.12502	WT	caf20M2
YOR340C	3	2	74.15	0.00724799	0.0542905	1.39687	WT	caf20M2
YDR099W	18	3	1123.16	0.00731804	0.054606	1.14478	WT	caf20M2
YHR146W	12	8	320.4	0.00738521	0.0548976	1.50063	WT	caf20M2
YJL130C	114	83	5536.06	0.00762769	0.0564854	1.21269	WT	caf20M2
YLR270W	13	9	402.04	0.00767086	0.0565907	1.24909	WT	caf20M2
YER133W	8	7	316.38	0.00778848	0.0572424	1.21968	WT	caf20M2
YIL162W	2	2	28.45	0.00819767	0.0600241	1.44744	WT	caf20M2
YLR038C	1	1	22.54	0.00831039	0.0606225	2.17635	caf20M2	WT
YNL330C	2	2	95.51	0.00838331	0.060927	2.13258	WT	caf20M2
YLR056W	4	2	36.96	0.00847692	0.0613792	2.58612	WT	caf20M2
YDR177W	5	5	126.59	0.00857449	0.0617154	1.49717	WT	caf20M2
YKL192C	2	2	85.11	0.00860369	0.0617154	1.89496	caf20M2	WT
YDR304C	7	6	171.52	0.00864425	0.0617154	1.35073	WT	caf20M2
YER069W	35	27	1284.68	0.00868811	0.0617154	1.62949	WT	caf20M2
YMR145C	10	4	132.62	0.00869517	0.0617154	2.72542	WT	caf20M2
YLR355C	33	28	2073.3	0.00871276	0.0617154	1.42165	WT	caf20M2
YDL110C	6	4	283.48	0.00875838	0.0618146	1.37532	caf20M2	WT
YIL021W	4	2	109.85	0.00880101	0.0618728	2.86066	WT	caf20M2
YGR158C	3	3	73.47	0.00883297	0.0618728	1.93977	WT	caf20M2
YBR026C	10	5	268.74	0.00887365	0.0618728	1.20265	WT	caf20M2
YKL094W	4	2	72.8	0.00889323	0.0618728	1.64285	WT	caf20M2
YKL216W	8	5	337.87	0.00905476	0.0627732	1.95745	WT	caf20M2
YKR081C	5	2	149.68	0.00929706	0.0642253	2.18963	WT	caf20M2
YCR084C	22	16	852.73	0.00958692	0.0659945	1.18512	caf20M2	WT
YHL011C	14	12	478.64	0.00978108	0.0670948	1.39182	caf20M2	WT
YGR118W	11	10	362.75	0.00987843	0.0675256	1.24287	WT	caf20M2
YJR065C	19	15	506.18	0.00996227	0.0678614	1.35274	WT	caf20M2
YOR320C	4	2	46.08	0.010051	0.0682283	2.33145	caf20M2	WT
YNL173C	6	3	135.49	0.0100899	0.0682552	2.35088	WT	caf20M2
YJR004C	3	3	68.99	0.010156	0.0684652	2.36923	WT	caf20M2
YJL164C	2	1	57.51	0.0102456	0.0686887	10.525	WT	caf20M2
YGR285C	22	18	857.05	0.0103032	0.0686887	1.17439	WT	caf20M2
YHR121W	4	4	215.27	0.0103284	0.0686887	1.51066	caf20M2	WT
YPR110C	9	8	340.71	0.0103297	0.0686887	1.19805	WT	caf20M2
YBR207W	2	1	51.21	0.0105185	0.0696728	3.75896	WT	caf20M2
YJR007W	19	13	500.25	0.0105489	0.0696728	1.22199	caf20M2	WT
YAR042W	14	6	112.86	0.010696	0.0704061	1.85702	caf20M2	WT
YLR324W	2	2	32.22	0.0109688	0.0719599	5.39873	caf20M2	WT
YLR113W	5	4	150.62	0.0111271	0.0727541	1.73794	caf20M2	WT
YCL043C	25	19	1411.02	0.011338	0.073886	1.27131	WT	caf20M2
YKL024C	14	7	419.02	0.0113903	0.0739802	2.37794	caf20M2	WT
YKR038C	4	2	40.87	0.0114806	0.0743201	1.55496	caf20M2	WT
YDR170C	23	15	483.96	0.0118305	0.0763318	1.45656	caf20M2	WT
YHR019C	30	27	1495.68	0.0118725	0.0763512	1.16311	WT	caf20M2
YFL039C	37	34	1830.53	0.0119711	0.0767331	1.24111	WT	caf20M2
YEL042W	8	6	194.53	0.0120721	0.0769057	1.56516	WT	caf20M2
YLR216C	21	16	608.95	0.0121152	0.0769057	1.25553	WT	caf20M2
YKL058W	2	2	64.15	0.0121411	0.0769057	2.99222	caf20M2	WT
YDL185W	60	53	2885.56	0.0121554	0.0769057	1.19981	WT	caf20M2
YLR419W	15	7	95.14	0.0124597	0.0784578	1.3331	WT	caf20M2
YDL051W	8	5	316.51	0.012481	0.0784578	1.24747	WT	caf20M2
YML123C	5	2	85.28	0.0125343	0.0785405	2.80356	caf20M2	WT
YMR202W	3	3	152.36	0.0126243	0.0788514	1.74409	WT	caf20M2
YGR088W	10	9	189.58	0.0126649	0.078853	1.79994	WT	caf20M2
YPL120W	4	1	37.26	0.0128423	0.0794555	1.90387	caf20M2	WT
YBR089C-A	3	1	75.17	0.0128912	0.0794555	1.59617	caf20M2	WT
YJL109C	17	12	391.9	0.0129045	0.0794555	1.55691	caf20M2	WT
YLR259C	30	22	2048.83	0.0129576	0.0794555	1.18351	caf20M2	WT
YER012W	6	4	235.91	0.0129716	0.0794555	1.21838	caf20M2	WT
YLL024C	54	12	3788.76	0.0130055	0.0794555	1.20377	caf20M2	WT
YPR147C	3	2	30.96	0.0131014	0.0797871	1.5462	caf20M2	WT
YDR378C	4	4	179.32	0.0131414	0.0797871	1.22229	WT	caf20M2
YKR048C	10	10	612.4	0.013283	0.0801174	1.20999	caf20M2	WT
YMR072W	8	5	152.26	0.0133212	0.0801174	1.35761	WT	caf20M2
YHR074W	9	8	205.42	0.0133491	0.0801174	1.48217	WT	caf20M2
YJL111W	15	11	592.91	0.0133597	0.0801174	1.22779	caf20M2	WT
YOR120W	5	2	204.01	0.0134454	0.0803846	2.38403	WT	caf20M2
YEL024W	2	1	100.02	0.0136309	0.0812454	6.52723	WT	caf20M2
YFR001W	2	2	130.53	0.0136998	0.081314	1.50767	WT	caf20M2
YKL056C	11	10	639.96	0.0137256	0.081314	1.33031	caf20M2	WT
YHR179W	22	18	1119.45	0.013776	0.0813661	1.20942	WT	caf20M2
YJR009C	35	6	2131.41	0.0139718	0.0822737	1.88425	WT	caf20M2
YBR256C	9	9	344.77	0.0140939	0.0827436	1.709	WT	caf20M2
YNL121C	21	13	630.59	0.0144023	0.0840424	1.52449	WT	caf20M2
YGR173W	6	6	218.15	0.014428	0.0840424	1.31722	WT	caf20M2
YOR283W	6	4	109.52	0.0144653	0.0840424	1.67836	WT	caf20M2
YNL113W	6	5	260.49	0.0144871	0.0840424	1.53292	WT	caf20M2
YOR165W	13	9	170.71	0.0147033	0.0848522	1.45267	caf20M2	WT
YLL048C	24	11	324.89	0.0147135	0.0848522	2.72703	caf20M2	WT
YOR171C	2	1	60.82	0.0148189	0.0852089	2.12486	WT	caf20M2
YOR298C-A	6	4	279.64	0.0148709	0.0852568	1.26698	caf20M2	WT
YHR024C	6	3	100.79	0.0149569	0.0854992	1.38807	caf20M2	WT
YGL055W	9	6	265.69	0.0151945	0.0866041	1.37984	caf20M2	WT
YCL030C	48	39	2525.89	0.0154563	0.0878404	1.25341	WT	caf20M2
YCL009C	11	11	465.48	0.0157101	0.0890238	1.41485	WT	caf20M2
YAL038W	53	42	3354.46	0.0158509	0.0895622	1.35346	caf20M2	WT
YJL069C	5	3	106.1	0.0159954	0.0901183	1.78348	WT	caf20M2
YIL036W	5	2	44.81	0.0160475	0.0901516	10.1405	WT	caf20M2
YIL043C	11	9	264.25	0.0162388	0.0909651	1.6831	WT	caf20M2
YDR062W	10	7	222.15	0.016326	0.0911922	1.55138	caf20M2	WT
YOL058W	25	21	1476.73	0.0165022	0.0919139	1.61201	WT	caf20M2
YDL128W	1	1	69.88	0.0165587	0.0919668	10.5903	caf20M2	WT
YIL109C	15	11	422.14	0.016609	0.0919845	1.25627	WT	caf20M2
YPR103W	8	7	272.7	0.0167161	0.0923162	1.3586	WT	caf20M2
YOR369C	9	9	862.23	0.0168605	0.0928517	1.13405	caf20M2	WT
YIR035C	3	2	60.65	0.0169153	0.0928916	2.35778	WT	caf20M2
YAR015W	21	12	947.1	0.0171026	0.093497	1.64663	caf20M2	WT
YIL138C	13	10	379.78	0.0171212	0.093497	1.49682	WT	caf20M2
YDL066W;YLR174W	33	21	1663.38	0.0172898	0.0941175	1.45038	WT	caf20M2
YOR335C	52	39	2279.08	0.0173311	0.0941175	1.17395	WT	caf20M2
YLR167W;YIL148W	12	8	627.68	0.0173998	0.0942287	1.36506	caf20M2	WT
YMR093W	4	4	56.51	0.0174769	0.0943849	2.31915	WT	caf20M2
YIL094C	17	12	609.18	0.0176617	0.0951199	1.1757	caf20M2	WT
YPR183W	10	8	213.56	0.0177125	0.0951316	1.46378	WT	caf20M2
YHR009C	7	6	227.52	0.0179245	0.0960068	1.32418	WT	caf20M2
YGL093W	8	1	68.08	0.0181757	0.0970861	3.73204	WT	caf20M2
YDR023W	34	28	1627.88	0.0183388	0.0976902	1.16037	WT	caf20M2
YOR270C	14	10	697.6	0.0184762	0.0981547	2.31462	WT	caf20M2
YDL236W	6	5	182.91	0.0186358	0.0987346	1.77563	WT	caf20M2
YNL229C	5	3	97.5	0.0188442	0.0995689	1.4316	WT	caf20M2
YOR020W-A	2	2	63.89	0.0190657	0.100468	2.38748	WT	caf20M2
YPR040W	4	3	31.69	0.0192499	0.101166	1.58676	WT	caf20M2
YOR209C	13	10	449.34	0.019835	0.103961	1.19274	WT	caf20M2
YHL021C	9	9	275.68	0.0199244	0.103989	1.45055	WT	caf20M2
YMR295C	3	3	60.48	0.0199468	0.103989	2.02257	WT	caf20M2
YMR108W	30	25	1425.77	0.020046	0.104073	1.35466	WT	caf20M2
YGR032W	21	2	749.58	0.0201116	0.104073	2.77628	WT	caf20M2
YJL136C	8	1	578.19	0.0201226	0.104073	1.4213	WT	caf20M2
YNR007C	3	1	56.01	0.0204533	0.105505	2.62932	WT	caf20M2
YDR298C	10	8	332.98	0.0205566	0.105589	1.79645	WT	caf20M2
YNL007C	15	12	608.97	0.0206015	0.105589	1.20673	WT	caf20M2
YDR390C	5	1	57.73	0.0206316	0.105589	7.78237	caf20M2	WT
YDR051C	3	3	93.27	0.0209492	0.106934	1.67531	WT	caf20M2
YKL060C	31	28	2081.44	0.0210669	0.106983	1.25075	caf20M2	WT
YGL253W	34	25	1761.14	0.0211412	0.106983	1.19789	WT	caf20M2
YKL096W	5	4	330.65	0.0211495	0.106983	1.48329	caf20M2	WT
YJL179W	7	4	84.94	0.0211777	0.106983	1.30702	WT	caf20M2
YLR175W	16	13	496.38	0.0212759	0.107074	1.18692	WT	caf20M2
YJL024C	1	1	29.73	0.0213418	0.107074	2.43703	WT	caf20M2
YIR037W	6	4	201.61	0.0214259	0.107074	1.30555	WT	caf20M2
YKL215C	13	7	270.4	0.0214703	0.107074	1.3663	caf20M2	WT
YGR162W	23	16	620.27	0.0215635	0.107074	1.29513	WT	caf20M2
YDR453C	4	1	71.83	0.0215669	0.107074	1.86562	caf20M2	WT
YGR033C	2	1	56.26	0.021579	0.107074	3.39208	WT	caf20M2
YOR332W	15	13	775.73	0.0220162	0.108733	1.20149	WT	caf20M2
YML004C	9	5	193.94	0.0220486	0.108733	1.73155	WT	caf20M2
YHR208W	23	17	1526.6	0.0220855	0.108733	1.48085	WT	caf20M2
YKL103C	11	9	347.45	0.0222273	0.108733	1.3033	WT	caf20M2
YER049W	14	9	370.14	0.0222812	0.108733	1.33682	WT	caf20M2
YHR064C	25	22	1099.33	0.0222935	0.108733	1.18805	WT	caf20M2
YJL081C	2	1	47.08	0.0223027	0.108733	4.65383	WT	caf20M2
YJL082W	6	3	80.31	0.0223761	0.108819	1.21899	caf20M2	WT
YJL076W	10	4	212.89	0.0225513	0.109399	1.63403	WT	caf20M2
YCL040W	20	13	698.88	0.0228017	0.11034	1.28496	WT	caf20M2
YER048C	10	7	429.61	0.0228721	0.110407	1.18833	WT	caf20M2
YLR248W	8	4	113.13	0.0229893	0.1107	1.51086	WT	caf20M2
YNR050C	22	19	907.34	0.0231548	0.111172	1.42706	WT	caf20M2
YDL130W	2	2	171.16	0.0232011	0.111172	1.4359	caf20M2	WT
YFR010W	10	9	283.56	0.023285	0.111301	1.26793	WT	caf20M2
YHR029C	9	6	446.67	0.023342	0.111302	1.71056	WT	caf20M2
YPL190C	7	6	159.37	0.0233997	0.111305	1.51505	caf20M2	WT
YBL068W	10	3	238.74	0.0235472	0.111735	1.39424	WT	caf20M2
YJL167W	14	7	684.69	0.0237565	0.112257	1.32287	WT	caf20M2
YAL036C	10	5	145.71	0.023772	0.112257	1.28489	caf20M2	WT
YGR200C	6	6	160.64	0.0239299	0.112609	1.40307	caf20M2	WT
YDR267C	3	3	45.34	0.0239618	0.112609	1.60564	WT	caf20M2
YGL232W	10	5	252.84	0.0241367	0.113159	1.29756	WT	caf20M2
YNR035C	8	8	329.38	0.0245701	0.114915	1.16112	WT	caf20M2
YAL046C	2	2	48.99	0.0247201	0.115341	2.09594	caf20M2	WT
YKR025W	3	3	82.2	0.024955	0.11616	1.30646	caf20M2	WT
YOR362C	9	8	252.13	0.0251177	0.116639	1.26922	WT	caf20M2
YDR382W	9	9	713.43	0.0254699	0.117772	1.18666	caf20M2	WT
YJR109C	60	47	3097.2	0.0254822	0.117772	1.32901	WT	caf20M2
YHR163W	9	8	353.88	0.0257068	0.11853	1.95874	caf20M2	WT
YMR131C	9	7	287.8	0.0264456	0.121056	1.19429	WT	caf20M2
YNL059C	6	3	76.17	0.0264807	0.121056	1.61875	WT	caf20M2
YDL103C	18	13	469.48	0.0264898	0.121056	1.29578	WT	caf20M2
YLR022C	5	2	59.53	0.0265024	0.121056	1.38194	WT	caf20M2
YKL033W-A	7	5	300.95	0.0266598	0.12132	1.69613	caf20M2	WT
YKL214C	1	1	64.91	0.0266842	0.12132	1.65194	caf20M2	WT
YGR116W	30	17	631.45	0.0268746	0.121902	1.58152	caf20M2	WT
YFL010C	5	3	98.31	0.0269642	0.122026	1.72589	WT	caf20M2
YPL004C	15	9	1006.39	0.0276515	0.124677	1.13444	WT	caf20M2
YOR323C	19	14	706.46	0.0277232	0.124677	1.25261	WT	caf20M2
YBR022W	2	1	21.79	0.0277415	0.124677	3.25955	caf20M2	WT
YDR212W	18	11	630.74	0.0280681	0.125657	1.26832	caf20M2	WT
YLR009W	3	2	17.07	0.028088	0.125657	4.47277	WT	caf20M2
YBR287W	1	1	51.63	0.0282279	0.125994	12.4262	caf20M2	WT
YPR028W	3	2	38.64	0.0283947	0.126335	1.59946	WT	caf20M2
YPR172W	3	2	28.65	0.0284334	0.126335	1.2794	WT	caf20M2
YGR280C	3	3	44.03	0.0287978	0.127664	5.41695	caf20M2	WT
YDR496C	12	7	178.43	0.0290713	0.128585	1.76626	WT	caf20M2
YAL049C	5	3	103.6	0.0294971	0.130173	1.61569	caf20M2	WT
YDR321W	8	8	286.89	0.0298798	0.131565	1.25346	WT	caf20M2
YPR019W	4	2	77.53	0.0301978	0.132667	2.90945	caf20M2	WT
YHR089C	6	3	120.6	0.0302855	0.132754	1.40635	WT	caf20M2
YGL101W	5	4	81.97	0.0303687	0.132821	1.41267	WT	caf20M2
YML120C	4	3	44.72	0.0308149	0.134471	2.28878	WT	caf20M2
YGL157W	15	10	388.4	0.0316728	0.137907	1.26354	caf20M2	WT
YML100W	23	19	573.02	0.0320129	0.139078	1.0755	WT	caf20M2
YPR112C	7	3	115.78	0.0323755	0.140342	1.87343	WT	caf20M2
YMR308C	9	7	238.39	0.0326159	0.141071	1.30492	caf20M2	WT
YML034W	6	2	60.73	0.0334342	0.144291	5.82564	caf20M2	WT
YBR053C	9	7	228.13	0.0335624	0.144525	1.31442	WT	caf20M2
YLL018C	31	28	1523.78	0.0336947	0.144776	1.1652	WT	caf20M2
YER056C	3	3	191.55	0.0338472	0.145067	2.9564	caf20M2	WT
YMR246W	19	12	415.49	0.0339108	0.145067	1.32871	WT	caf20M2
YDR469W	2	1	74.36	0.0342636	0.145913	1.41909	WT	caf20M2
YKL157W	31	25	1394.4	0.0343146	0.145913	1.19339	caf20M2	WT
YMR092C	15	11	401.91	0.0343325	0.145913	1.23705	WT	caf20M2
YDR165W	8	7	194.85	0.0345678	0.146594	1.30499	WT	caf20M2
YHR138C	2	1	40.24	0.0349683	0.147674	3.7846	caf20M2	WT
YNL035C	2	1	29.54	0.0349734	0.147674	1.3606	WT	caf20M2
YMR268C	5	1	35.71	0.0350638	0.147736	4.62459	WT	caf20M2
YPL093W	14	6	337.32	0.0356181	0.149432	1.41602	caf20M2	WT
YJR088C	6	3	255.49	0.0356192	0.149432	2.15668	caf20M2	WT
YJL158C	3	1	141.52	0.0358372	0.150025	1.61259	WT	caf20M2
YKL213C	8	4	101.02	0.036435	0.152202	2.08483	WT	caf20M2
YER004W	5	3	63.57	0.0367251	0.152631	1.47393	WT	caf20M2
YDR057W	5	1	47.39	0.0367283	0.152631	3.92338	WT	caf20M2
YML093W	7	3	42.04	0.0367721	0.152631	2.57734	caf20M2	WT
YBR115C	39	30	1255.67	0.0369025	0.152848	1.23984	WT	caf20M2
YBR085W	6	1	86.41	0.0375237	0.154825	2.30094	caf20M2	WT
YHR025W	12	11	489.67	0.0375382	0.154825	1.12859	WT	caf20M2
YIL145C	4	3	69.8	0.0377088	0.155053	2.61031	caf20M2	WT
YLR197W	15	14	715.94	0.0377521	0.155053	1.19228	WT	caf20M2
YER143W	3	2	28.65	0.0378683	0.155204	1.23283	WT	caf20M2
YDL190C	10	4	124.58	0.038273	0.156535	2.00775	WT	caf20M2
YOR014W	1	1	21.15	0.0384585	0.156965	4.71605	WT	caf20M2
YNL138W	9	7	292.65	0.0387767	0.157934	1.21269	WT	caf20M2
YDR120C	11	4	111.8	0.0391117	0.158641	1.38916	WT	caf20M2
YGR009C	6	2	105.56	0.039142	0.158641	1.29501	WT	caf20M2
YBR200W	3	1	51.49	0.0391938	0.158641	18.6922	WT	caf20M2
YLR129W	10	5	166.61	0.0395714	0.159597	1.46795	WT	caf20M2
YKR095W	24	14	279.39	0.0395931	0.159597	2.69501	caf20M2	WT
YIL039W	1	1	16.68	0.0398435	0.160276	23.4822	WT	caf20M2
YOR286W	6	2	129.32	0.0405284	0.16247	1.89666	caf20M2	WT
YNL192W	2	1	38.16	0.0405553	0.16247	Inf	WT	caf20M2
YOR191W	16	3	131.9	0.0410211	0.163603	1.56495	caf20M2	WT
[truncated: 1,466 more rows]

## Sheet: Dataset7. CAF20-FL IP RNA Seq
gene_name	genes	logFC	logCPM	LR	PValue	FDR
[truncated: 5,719 more rows]

[truncated: 4 more sheets: Dataset8. CAF20m2-FL IP RNA Seq, Dataset9. Caf20Core4E-DEP mRNAs, Dataset10 Caf20Core4E-IND mRNAs, Dataset11. 3'UTR Meme Motif]
